# Supplementary material for: Transcriptomic and functional analysis of ANGPTL4 overexpression in pancreatic cancer nominates targets that reverse chemoresistance
Source: Springer Nature journal article supplement (doi:10.1186/s12885-023-11010-1), 2023-06-08

**Supplemental Figure S1: a)** Kaplan-Meier curve of Recurrence/Disease Free Survival (RFS) using GEPIA PPAD dataset. Logrank  $p=0.047$  **b)** Protein abundance of ANGPTL4 in cell lysate and supernatant as measured by ALPHAlisa assay for normalization by cell input. MP2\_ANGPTL4\_OE vs MP2\_ANGPTL4\_KD  $p=0.0075$  and  $0.0018$  (\*\*) for lysate and supernatant. MP2\_ANGPTL4\_OE vs MP2  $p=0.0055$  (\*\*) for lysate. **c)** Heatmap of RNA-seq data for 1198 DEG from MP2\_ANGPTL4\_OE vs MP2\_ANGPTL4\_KD with thresholds: baseMean $>10$  padj $<0.05$ , and  $\log_2$  fold change  $\pm 0.7$ . **d)** Kaplan-Meier plot for overall survival using TCGA-PAAD data. Patients with top (red) and bottom (blue) 25% average ANGPTL4 gene expression and APOL1 plus ITGB4 gene expression ( $p=0.015$ , log-rank test).

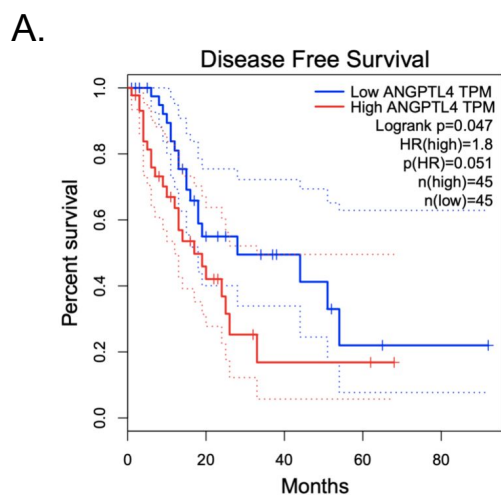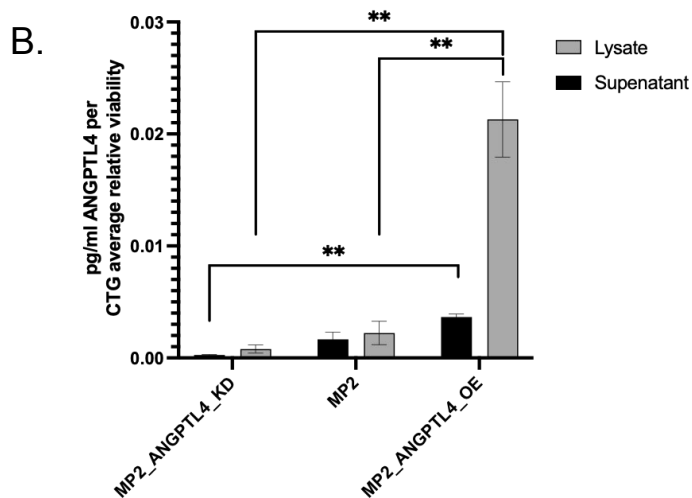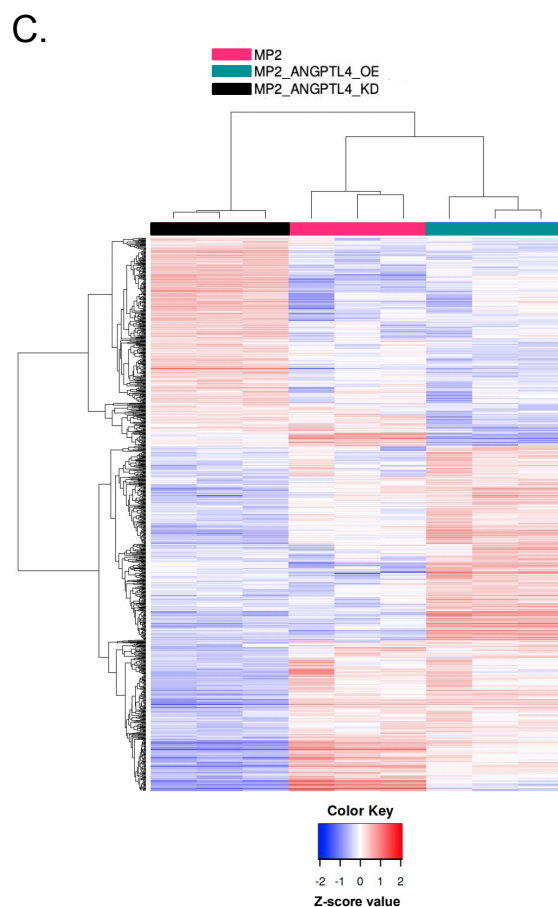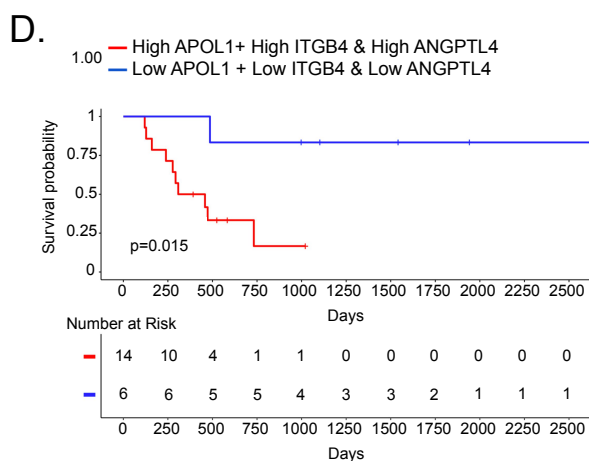

Supplement: MOESM1 [file 25464062]
