# Supplementary material for: Transcriptomic and functional analysis of ANGPTL4 overexpression in pancreatic cancer nominates targets that reverse chemoresistance
Source: Springer Nature journal article supplement (doi:10.1186/s12885-023-11010-1), 2023-06-08

**Supplemental Figure 2: a)** ITGB4 expression measured by qPCR and normalized by the housekeeping gene *ACTB*. All data points are plotted relative to the ANGPTL4\_OE line. **b)** *APOL1* expression measured by qPCR and normalized by the housekeeping gene *ACTB*. All data points are plotted relative to the ANGPTL4\_OE line. **c)** Cell viability over time normalized to control MP2 cells (lt. pink) at time 0 for MP2\_NTC (pink), MP2\_ANGPTL4\_OE+DsiRNA\_NTC (turquoise), MP2\_ANGPTL4\_OE\_ITGB4\_KD (lavender), and MP2\_ANGPTL4\_OE\_APOL1\_KD (purple).

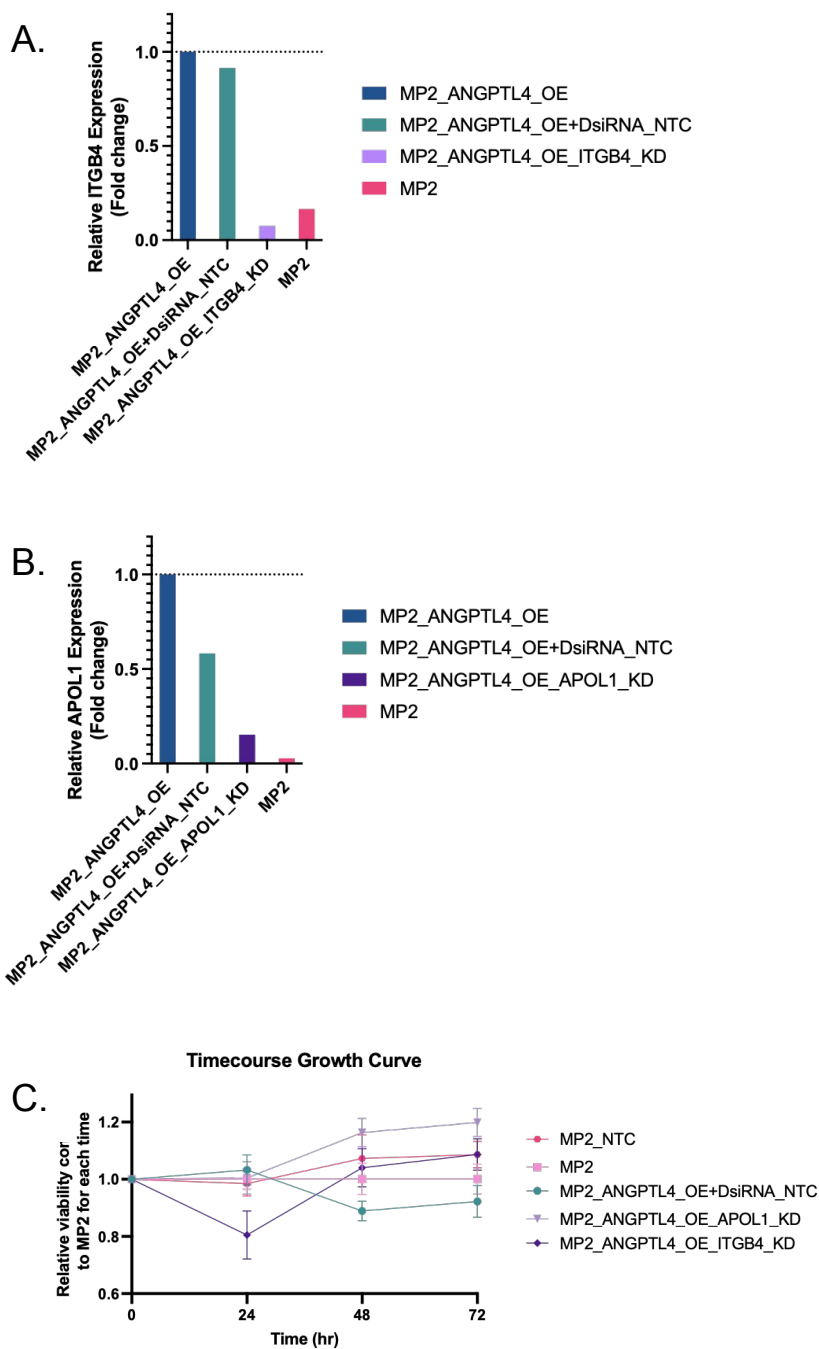

Supplement: MOESM2 [file 25464062]
