# Supplementary material for: Transcriptomic and functional analysis of ANGPTL4 overexpression in pancreatic cancer nominates targets that reverse chemoresistance
Source: Springer Nature journal article supplement (doi:10.1186/s12885-023-11010-1), 2023-06-08
Supplement: MOESM3 [file 25464062]

Supplementary Table 1: P-values associated with qPCR and viability data

| Figure Association | Experimental Measure                         | Comparison                                                                        | P-value | Significance Flags |
|--------------------|----------------------------------------------|-----------------------------------------------------------------------------------|---------|--------------------|
| 1B                 | qPCR ANGPTL4 Fold Change                     | MP2_ANGPTL4_KD vs MP2                                                             | <0.0001 | ****               |
| 1B                 | qPCR ANGPTL4 Fold Change                     | MP2_ANGPTL4_KD vs MP2_ANGPTL4_OE                                                  | <0.0001 | ****               |
| 1B                 | qPCR ANGPTL4 Fold Change                     | MP2_ANGPTL4_OE vs MP2                                                             | <0.0001 | ****               |
| 2A                 | Relative Viability                           | 0nM Gemcitabine MP2_NTC vs 5nM Gemcitabine MP2_ANGPTL4_KD                         | 0.0007  | ***                |
| 2A                 | Relative Viability                           | 0nM Gemcitabine MP2_NTC vs 12.5nM Gemcitabine MP2_ANGPTL4_KD                      | <0.0001 | ****               |
| 2A                 | Relative Viability                           | 0nM Gemcitabine MP2_NTC vs 5nM Gemcitabine MP2_ANGPTL4_OE                         | <0.0001 | ****               |
| 2A                 | Relative Viability                           | 0nM Gemcitabine MP2_NTC vs 12.5nM Gemcitabine MP2_ANGPTL4_OE                      | 0.0021  | **                 |
| 2A                 | Relative Viability                           | 5nM Gemcitabine MP2_ANGPTL4_KD vs 5nM Gemcitabine MP2_ANGPTL4_OE                  | 0.0005  | ***                |
| 2A                 | Relative Viability                           | 12.5nM Gemcitabine MP2_ANGPTL4_KD vs 12.5nM Gemcitabine MP2_ANGPTL4_OE            | 0.0005  | ***                |
| 3C                 | qPCR relative ANGPTL4 Expression-Fold Change | MP2 vs MP2_ANGPTL4_OE_DsiRNA_NTC                                                  | <0.0001 | ****               |
| 3C                 | qPCR relative ANGPTL4 Expression-Fold Change | MP2_ANGPTL4_OE_DsiRNA_NTC vs MP2_ANGPTL4_OE_APOL1_KD                              | <0.0001 | ****               |
| 3C                 | qPCR relative ANGPTL4 Expression-Fold Change | MP2_ANGPTL4_OE_DsiRNA_NTC vs MP2_ANGPTL4_OE_ITGB4_KD                              | <0.0001 | ****               |
| 3D                 | Relative Viability                           | 5nM Gemcitabine MP2_ANGPTL4_KD vs 5nM Gemcitabine MP2_ANGPTL4_OE_DsiRNA_NTC       | <0.0001 | ****               |
| 3D                 | Relative Viability                           | 5nM Gemcitabine MP2_ANGPTL4_OE_DsiRNA_NTC vs 5nM MP2_ANGPTL4_OE_APOL1_KD          | 0.0002  | ***                |
| 3D                 | Relative Viability                           | 5nM Gemcitabine MP2_ANGPTL4_OE_DsiRNA_NTC vs 5nM MP2_ANGPTL4_OE_ITGB4_KD          | <0.0001 | ****               |
| 3D                 | Relative Viability                           | 12.5nM Gemcitabine MP2_ANGPTL4_KD vs 12.5nM Gemcitabine MP2_ANGPTL4_OE_DsiRNA_NTC | <0.0001 | ****               |
| 3D                 | Relative Viability                           | 12.5nM Gemcitabine MP2_ANGPTL4_OE_DsiRNA_NTC vs 12.5nM MP2_ANGPTL4_OE_APOL1_KD    | <0.0001 | ****               |
| 3D                 | Relative Viability                           | 12.5nM Gemcitabine MP2_ANGPTL4_OE_DsiRNA_NTC vs 12.5nM MP2_ANGPTL4_OE_ITGB4_KD    | <0.0001 | ****               |
| 4C                 | t1/2 gap                                     | MP2_NTC vs MP2_ANGPTL4_OE_DsiRNA_NTC                                              | 0.0064  | **                 |
| 4C                 | t1/2 gap                                     | MP2_ANGPTL4_OE_DsiRNA_NTC vs 12.5nM MP2_ANGPTL4_OE_APOL1_KD                       | 0.0057  | **                 |
| 4C                 | t1/2 gap                                     | MP2_ANGPTL4_OE_DsiRNA_NTC vs 12.5nM MP2_ANGPTL4_OE_ITGB4_KD                       | 0.0169  | **                 |
