# Supplementary material for: Transcriptomic and functional analysis of ANGPTL4 overexpression in pancreatic cancer nominates targets that reverse chemoresistance
Source: Springer Nature journal article supplement (doi:10.1186/s12885-023-11010-1), 2023-06-08
Supplement: MOESM4 [file 25464062]

Supplementary Table 2: DEG from MP2\_ANGPTL4\_OE vs MP2\_ANGPTL4\_KD analysis with or without gemcitabine treatment

| Ensembl Gene    | HGNC Symbol | baseMean | log2       |       | stat    | pvalue   | padj     | Gemcitabine Treatment |
|-----------------|-------------|----------|------------|-------|---------|----------|----------|-----------------------|
|                 |             |          | FoldChange | lfcSE |         |          |          |                       |
| ENSG00000125398 | SOX9        | 339.357  | 2.209      | 0.105 | 21.087  | 1.05E-98 | 1.41E-94 | no                    |
| ENSG00000159200 | RCAN1       | 161.447  | 2.928      | 0.145 | 20.151  | 2.64E-90 | 1.76E-86 | no                    |
| ENSG00000177606 | JUN         | 442.895  | 1.465      | 0.077 | 18.935  | 5.85E-80 | 2.60E-76 | no                    |
| ENSG00000137831 | UACA        | 595.936  | 1.675      | 0.089 | 18.887  | 1.47E-79 | 4.89E-76 | no                    |
| ENSG00000023445 | BIRC3       | 139.420  | 2.291      | 0.125 | 18.399  | 1.35E-75 | 3.59E-72 | no                    |
| ENSG00000127603 | MACF1       | 714.172  | 1.464      | 0.081 | 18.182  | 7.14E-74 | 1.59E-70 | no                    |
| ENSG00000119917 | IFIT3       | 91.516   | 3.099      | 0.171 | 18.151  | 1.26E-73 | 2.39E-70 | no                    |
| ENSG00000163661 | PTX3        | 49.016   | 4.081      | 0.235 | 17.360  | 1.65E-67 | 2.74E-64 | no                    |
| ENSG00000118515 | SGK1        | 148.656  | 2.271      | 0.133 | 17.110  | 1.25E-65 | 1.86E-62 | no                    |
| ENSG00000172137 | CALB2       | 70.722   | 2.868      | 0.178 | 16.154  | 1.07E-58 | 1.42E-55 | no                    |
| ENSG00000119922 | IFIT2       | 120.866  | 2.743      | 0.172 | 15.991  | 1.47E-57 | 1.78E-54 | no                    |
| ENSG00000175745 | NR2F1       | 439.988  | 2.109      | 0.132 | 15.946  | 3.02E-57 | 3.35E-54 | no                    |
| ENSG00000075223 | SEMA3C      | 148.607  | 2.454      | 0.155 | 15.874  | 9.65E-57 | 9.89E-54 | no                    |
| ENSG00000156453 | PCDH1       | 96.811   | 3.564      | 0.225 | 15.853  | 1.33E-56 | 1.27E-53 | no                    |
| ENSG00000154263 | ABCA10      | 36.405   | 4.635      | 0.293 | 15.830  | 1.92E-56 | 1.71E-53 | no                    |
| ENSG00000105810 | CDK6        | 198.946  | 2.972      | 0.189 | 15.756  | 6.28E-56 | 5.23E-53 | no                    |
| ENSG00000100852 | ARHGAP5     | 343.284  | 1.631      | 0.104 | 15.713  | 1.22E-55 | 9.59E-53 | no                    |
| ENSG00000080824 | HSP90AA1    | 5750.170 | -1.002     | 0.064 | -15.698 | 1.55E-55 | 1.15E-52 | no                    |
| ENSG00000075711 | DLG1        | 303.613  | 1.565      | 0.100 | 15.624  | 5.00E-55 | 3.51E-52 | no                    |
| ENSG00000041353 | RAB27B      | 130.622  | 2.479      | 0.160 | 15.516  | 2.72E-54 | 1.81E-51 | no                    |
| ENSG00000196141 | SPATS2L     | 392.103  | 1.612      | 0.104 | 15.487  | 4.26E-54 | 2.70E-51 | no                    |
| ENSG00000137962 | ARHGAP29    | 523.492  | 1.529      | 0.099 | 15.412  | 1.36E-53 | 8.22E-51 | no                    |
| ENSG00000139318 | DUSP6       | 145.802  | -2.069     | 0.137 | -15.123 | 1.14E-51 | 6.60E-49 | no                    |
| ENSG00000141682 | PMAIP1      | 96.891   | 2.196      | 0.150 | 14.634  | 1.69E-48 | 9.40E-46 | no                    |
| ENSG00000116717 | GADD45A     | 177.352  | 1.472      | 0.101 | 14.596  | 2.97E-48 | 1.58E-45 | no                    |
| ENSG00000117592 | PRDX6       | 357.748  | -1.140     | 0.079 | -14.376 | 7.35E-47 | 3.77E-44 | no                    |
| ENSG00000140105 | WARS1       | 362.491  | 1.336      | 0.093 | 14.315  | 1.77E-46 | 8.71E-44 | no                    |
| ENSG00000187608 | ISG15       | 103.432  | 2.516      | 0.177 | 14.237  | 5.38E-46 | 2.56E-43 | no                    |
| ENSG00000163735 | CXCL5       | 57.101   | 2.698      | 0.192 | 14.021  | 1.16E-44 | 5.33E-42 | no                    |
| ENSG00000163347 | CLDN1       | 81.998   | 2.309      | 0.167 | 13.792  | 2.86E-43 | 1.27E-40 | no                    |
| ENSG00000135114 | OASL        | 32.690   | 4.251      | 0.309 | 13.763  | 4.26E-43 | 1.83E-40 | no                    |
| ENSG00000146648 | EGFR        | 299.075  | 1.290      | 0.094 | 13.668  | 1.57E-42 | 6.54E-40 | no                    |
| ENSG00000065613 | SLK         | 579.073  | 1.071      | 0.078 | 13.647  | 2.10E-42 | 8.47E-40 | no                    |
| ENSG00000205413 | SAMD9       | 74.455   | 4.096      | 0.301 | 13.602  | 3.92E-42 | 1.53E-39 | no                    |
| ENSG00000138646 | HERC5       | 46.361   | 3.231      | 0.238 | 13.585  | 4.91E-42 | 1.87E-39 | no                    |
| ENSG00000135318 | NT5E        | 187.939  | 1.904      | 0.142 | 13.416  | 4.85E-41 | 1.80E-38 | no                    |
| ENSG00000156510 | HKDC1       | 104.578  | -2.599     | 0.195 | -13.316 | 1.87E-40 | 6.74E-38 | no                    |
| ENSG00000189403 | HMGB1       | 444.777  | -1.115     | 0.084 | -13.231 | 5.84E-40 | 2.05E-37 | no                    |
| ENSG00000130766 | SESN2       | 178.352  | 1.821      | 0.139 | 13.114  | 2.73E-39 | 9.32E-37 | no                    |
| ENSG00000026508 | CD44        | 874.240  | 0.971      | 0.074 | 13.047  | 6.63E-39 | 2.21E-36 | no                    |

|                 |          |          |        |       |         |          |          |    |
|-----------------|----------|----------|--------|-------|---------|----------|----------|----|
| ENSG00000117724 | CENPF    | 1443.623 | -0.830 | 0.064 | -13.042 | 7.09E-39 | 2.30E-36 | no |
| ENSG00000163739 | CXCL1    | 39.192   | 2.837  | 0.219 | 12.950  | 2.36E-38 | 7.47E-36 | no |
| ENSG00000132470 | ITGB4    | 100.207  | 2.168  | 0.168 | 12.894  | 4.87E-38 | 1.51E-35 | no |
| ENSG00000135046 | ANXA1    | 412.100  | 1.021  | 0.080 | 12.834  | 1.06E-37 | 3.20E-35 | no |
| ENSG00000170689 | HOXB9    | 64.610   | 2.509  | 0.196 | 12.801  | 1.61E-37 | 4.77E-35 | no |
| ENSG00000126777 | KTN1     | 2524.085 | 0.829  | 0.066 | 12.587  | 2.48E-36 | 7.19E-34 | no |
| ENSG00000183668 | PSG9     | 29.969   | -4.287 | 0.341 | -12.580 | 2.74E-36 | 7.76E-34 | no |
| ENSG00000075618 | FSCN1    | 157.715  | 1.843  | 0.151 | 12.229  | 2.18E-34 | 6.06E-32 | no |
| ENSG00000075391 | RASAL2   | 115.531  | -2.176 | 0.179 | -12.132 | 7.15E-34 | 1.94E-31 | no |
| ENSG00000116133 | DHCR24   | 169.768  | -1.402 | 0.116 | -12.060 | 1.72E-33 | 4.58E-31 | no |
| ENSG00000124942 | AHNAK    | 439.064  | 0.978  | 0.081 | 12.026  | 2.61E-33 | 6.81E-31 | no |
| ENSG00000181104 | F2R      | 181.861  | -1.524 | 0.127 | -11.957 | 5.94E-33 | 1.52E-30 | no |
| ENSG00000142089 | IFITM3   | 481.099  | 1.448  | 0.122 | 11.821  | 3.05E-32 | 7.66E-30 | no |
| ENSG00000167772 | ANGPTL4  | 29.969   | 3.379  | 0.287 | 11.785  | 4.69E-32 | 1.16E-29 | no |
| ENSG00000130779 | CLIP1    | 493.116  | 0.993  | 0.084 | 11.781  | 4.90E-32 | 1.19E-29 | no |
| ENSG00000127947 | PTPN12   | 306.965  | 0.886  | 0.076 | 11.708  | 1.16E-31 | 2.77E-29 | no |
| ENSG00000108342 | CSF3     | 19.686   | 3.067  | 0.264 | 11.624  | 3.10E-31 | 7.25E-29 | no |
| ENSG00000072571 | HMMR     | 255.950  | -1.043 | 0.090 | -11.612 | 3.59E-31 | 8.25E-29 | no |
| ENSG00000162366 | PDZK1IP1 | 29.958   | 3.628  | 0.314 | 11.553  | 7.13E-31 | 1.61E-28 | no |
| ENSG00000107201 | DDX58    | 51.948   | 2.570  | 0.223 | 11.527  | 9.64E-31 | 2.14E-28 | no |
| ENSG00000050344 | NFE2L3   | 71.258   | 2.078  | 0.181 | 11.466  | 1.95E-30 | 4.27E-28 | no |
| ENSG00000167522 | ANKRD11  | 909.273  | 0.815  | 0.071 | 11.458  | 2.14E-30 | 4.54E-28 | no |
| ENSG00000104332 | SFRP1    | 27.576   | 3.883  | 0.339 | 11.458  | 2.14E-30 | 4.54E-28 | no |
| ENSG00000115267 | IFIH1    | 41.210   | 2.616  | 0.229 | 11.412  | 3.64E-30 | 7.57E-28 | no |
| ENSG00000166750 | SLFN5    | 65.462   | 2.155  | 0.189 | 11.403  | 4.03E-30 | 8.27E-28 | no |
| ENSG00000110047 | EHD1     | 130.784  | 1.719  | 0.151 | 11.366  | 6.19E-30 | 1.25E-27 | no |
| ENSG00000067082 | KLF6     | 378.170  | 0.821  | 0.073 | 11.324  | 9.96E-30 | 1.98E-27 | no |
| ENSG00000196526 | AFAP1    | 79.723   | 1.934  | 0.172 | 11.221  | 3.21E-29 | 6.30E-27 | no |
| ENSG00000154027 | AK5      | 28.914   | 3.012  | 0.269 | 11.185  | 4.81E-29 | 9.29E-27 | no |
| ENSG00000123094 | RASSF8   | 172.841  | 1.636  | 0.146 | 11.175  | 5.43E-29 | 1.03E-26 | no |
| ENSG00000090861 | AARS1    | 305.041  | 1.118  | 0.100 | 11.134  | 8.55E-29 | 1.60E-26 | no |
| ENSG00000105993 | DNAJB6   | 174.925  | 1.165  | 0.105 | 11.065  | 1.85E-28 | 3.42E-26 | no |
| ENSG00000175048 | ZDHHC14  | 92.811   | 1.895  | 0.172 | 10.999  | 3.86E-28 | 7.05E-26 | no |
| ENSG00000134057 | CCNB1    | 391.313  | -1.009 | 0.092 | -10.934 | 7.97E-28 | 1.40E-25 | no |
| ENSG00000173193 | PARP14   | 108.206  | 1.683  | 0.154 | 10.934  | 7.95E-28 | 1.40E-25 | no |
| ENSG00000075213 | SEMA3A   | 312.088  | 1.246  | 0.114 | 10.935  | 7.81E-28 | 1.40E-25 | no |
| ENSG00000156011 | PSD3     | 103.303  | 1.897  | 0.174 | 10.927  | 8.52E-28 | 1.47E-25 | no |
| ENSG00000110619 | CARS1    | 339.682  | 1.313  | 0.120 | 10.922  | 9.08E-28 | 1.55E-25 | no |
| ENSG00000113810 | SMC4     | 1417.539 | -0.760 | 0.070 | -10.883 | 1.40E-27 | 2.35E-25 | no |
| ENSG00000070814 | TCOF1    | 240.185  | -1.071 | 0.099 | -10.834 | 2.38E-27 | 3.97E-25 | no |
| ENSG00000235609 | n/a      | 40.588   | -2.284 | 0.211 | -10.808 | 3.16E-27 | 5.20E-25 | no |
| ENSG00000117984 | CTSD     | 363.134  | 1.408  | 0.130 | 10.790  | 3.83E-27 | 6.23E-25 | no |
| ENSG00000186591 | UBE2H    | 236.755  | 1.169  | 0.108 | 10.783  | 4.13E-27 | 6.62E-25 | no |

|                 |          |          |        |       |         |          |          |    |
|-----------------|----------|----------|--------|-------|---------|----------|----------|----|
| ENSG00000123240 | OPTN     | 166.154  | 1.174  | 0.110 | 10.706  | 9.52E-27 | 1.51E-24 | no |
| ENSG00000134146 | DPH6     | 49.999   | -2.451 | 0.230 | -10.658 | 1.60E-26 | 2.50E-24 | no |
| ENSG00000111145 | ELK3     | 117.773  | 1.374  | 0.129 | 10.616  | 2.50E-26 | 3.88E-24 | no |
| ENSG00000153827 | TRIP12   | 512.769  | 0.948  | 0.089 | 10.608  | 2.73E-26 | 4.17E-24 | no |
| ENSG00000111331 | OAS3     | 42.949   | 2.509  | 0.239 | 10.516  | 7.27E-26 | 1.10E-23 | no |
| ENSG00000147251 | DOCK11   | 136.232  | 1.202  | 0.115 | 10.478  | 1.09E-25 | 1.63E-23 | no |
| ENSG00000181467 | RAP2B    | 166.948  | 1.709  | 0.165 | 10.390  | 2.76E-25 | 4.09E-23 | no |
| ENSG00000137628 | DDX60    | 61.775   | 2.566  | 0.247 | 10.381  | 3.03E-25 | 4.38E-23 | no |
| ENSG00000164611 | PTTG1    | 309.045  | -0.930 | 0.090 | -10.382 | 2.99E-25 | 4.38E-23 | no |
| ENSG00000110888 | CAPRIN2  | 428.918  | 1.273  | 0.123 | 10.352  | 4.09E-25 | 5.80E-23 | no |
| ENSG00000167641 | PPP1R14A | 95.843   | -3.141 | 0.303 | -10.353 | 4.07E-25 | 5.80E-23 | no |
| ENSG00000100994 | PYGB     | 423.073  | 1.334  | 0.129 | 10.335  | 4.88E-25 | 6.84E-23 | no |
| ENSG00000168461 | RAB31    | 170.245  | 1.246  | 0.121 | 10.323  | 5.54E-25 | 7.68E-23 | no |
| ENSG00000011422 | PLAUR    | 131.985  | 2.039  | 0.198 | 10.279  | 8.75E-25 | 1.20E-22 | no |
| ENSG00000167601 | AXL      | 245.721  | 1.215  | 0.118 | 10.259  | 1.08E-24 | 1.46E-22 | no |
| ENSG00000139433 | GLTP     | 82.601   | 1.494  | 0.146 | 10.249  | 1.20E-24 | 1.62E-22 | no |
| ENSG00000101457 | DNTTIP1  | 135.358  | 1.478  | 0.144 | 10.238  | 1.34E-24 | 1.78E-22 | no |
| ENSG00000154133 | ROBO4    | 29.565   | 2.573  | 0.252 | 10.221  | 1.60E-24 | 2.10E-22 | no |
| ENSG00000109321 | AREG     | 454.603  | -1.112 | 0.110 | -10.112 | 4.90E-24 | 6.40E-22 | no |
| ENSG00000105939 | ZC3HAV1  | 205.340  | 0.963  | 0.095 | 10.111  | 4.95E-24 | 6.40E-22 | no |
| ENSG00000170485 | NPAS2    | 54.788   | 2.582  | 0.256 | 10.082  | 6.64E-24 | 8.51E-22 | no |
| ENSG00000181381 | DDX60L   | 45.840   | 2.100  | 0.209 | 10.057  | 8.53E-24 | 1.08E-21 | no |
| ENSG00000126709 | IFI6     | 41.801   | 2.331  | 0.232 | 10.054  | 8.85E-24 | 1.11E-21 | no |
| ENSG00000189060 | H1-0     | 103.915  | 1.755  | 0.176 | 9.980   | 1.86E-23 | 2.30E-21 | no |
| ENSG00000144802 | NFKBIZ   | 37.663   | 2.753  | 0.276 | 9.971   | 2.05E-23 | 2.50E-21 | no |
| ENSG00000163110 | PDLIM5   | 165.656  | 1.070  | 0.108 | 9.945   | 2.65E-23 | 3.21E-21 | no |
| ENSG00000130066 | SAT1     | 369.063  | 1.008  | 0.101 | 9.943   | 2.71E-23 | 3.26E-21 | no |
| ENSG00000134138 | MEIS2    | 57.569   | -2.671 | 0.270 | -9.906  | 3.92E-23 | 4.66E-21 | no |
| ENSG00000155368 | DBI      | 366.890  | -0.872 | 0.089 | -9.797  | 1.16E-22 | 1.37E-20 | no |
| ENSG00000166510 | CCDC68   | 45.340   | 2.057  | 0.210 | 9.779   | 1.38E-22 | 1.62E-20 | no |
| ENSG00000120694 | HSPH1    | 865.135  | -0.986 | 0.102 | -9.713  | 2.66E-22 | 3.08E-20 | no |
| ENSG00000111057 | KRT18    | 1526.946 | 0.704  | 0.073 | 9.702   | 2.97E-22 | 3.41E-20 | no |
| ENSG00000161243 | FBXO27   | 111.710  | 2.361  | 0.243 | 9.699   | 3.05E-22 | 3.47E-20 | no |
| ENSG00000159167 | STC1     | 41.811   | -2.395 | 0.247 | -9.698  | 3.07E-22 | 3.47E-20 | no |
| ENSG00000110330 | BIRC2    | 163.381  | 1.159  | 0.120 | 9.630   | 5.97E-22 | 6.68E-20 | no |
| ENSG00000181649 | PHLDA2   | 293.590  | 1.152  | 0.120 | 9.568   | 1.09E-21 | 1.21E-19 | no |
| ENSG00000048544 | MRPS10   | 240.680  | 0.923  | 0.096 | 9.566   | 1.11E-21 | 1.22E-19 | no |
| ENSG00000110958 | PTGES3   | 515.282  | -0.792 | 0.083 | -9.564  | 1.13E-21 | 1.24E-19 | no |
| ENSG00000117395 | EBNA1BP2 | 406.782  | -0.781 | 0.082 | -9.552  | 1.27E-21 | 1.38E-19 | no |
| ENSG00000135842 | NIBAN1   | 91.798   | 1.652  | 0.173 | 9.550   | 1.29E-21 | 1.39E-19 | no |
| ENSG00000197451 | HNRNPAB  | 545.680  | -0.788 | 0.083 | -9.535  | 1.50E-21 | 1.59E-19 | no |
| ENSG00000169908 | TM4SF1   | 499.184  | 0.818  | 0.086 | 9.474   | 2.70E-21 | 2.86E-19 | no |
| ENSG00000198959 | TGM2     | 180.267  | 1.251  | 0.133 | 9.412   | 4.89E-21 | 5.13E-19 | no |

|                 |          |         |        |       |        |          |          |    |
|-----------------|----------|---------|--------|-------|--------|----------|----------|----|
| ENSG00000116285 | ERRFI1   | 667.530 | 0.721  | 0.077 | 9.371  | 7.19E-21 | 7.49E-19 | no |
| ENSG00000138678 | GPAT3    | 78.062  | 1.677  | 0.179 | 9.345  | 9.19E-21 | 9.49E-19 | no |
| ENSG00000137804 | NUSAP1   | 309.187 | -0.834 | 0.090 | -9.276 | 1.76E-20 | 1.81E-18 | no |
| ENSG00000110090 | CPT1A    | 91.930  | 2.008  | 0.218 | 9.220  | 2.97E-20 | 3.02E-18 | no |
| ENSG00000164032 | H2AZ1    | 564.878 | -1.089 | 0.118 | -9.201 | 3.55E-20 | 3.58E-18 | no |
| ENSG00000148180 | GSN      | 97.885  | 1.658  | 0.181 | 9.160  | 5.17E-20 | 5.18E-18 | no |
| ENSG00000175471 | MCTP1    | 39.289  | 3.069  | 0.335 | 9.154  | 5.47E-20 | 5.44E-18 | no |
| ENSG00000120068 | HOXB8    | 94.497  | 2.593  | 0.284 | 9.119  | 7.61E-20 | 7.46E-18 | no |
| ENSG00000106105 | GARS1    | 398.991 | 0.815  | 0.091 | 8.994  | 2.38E-19 | 2.30E-17 | no |
| ENSG00000138685 | FGF2     | 45.520  | 1.640  | 0.183 | 8.983  | 2.63E-19 | 2.52E-17 | no |
| ENSG00000106366 | SERPINE1 | 445.748 | 1.718  | 0.192 | 8.963  | 3.16E-19 | 3.01E-17 | no |
| ENSG00000185745 | IFIT1    | 36.512  | 2.094  | 0.234 | 8.962  | 3.19E-19 | 3.02E-17 | no |
| ENSG00000223949 | ROR1-AS1 | 32.242  | -2.286 | 0.255 | -8.956 | 3.38E-19 | 3.15E-17 | no |
| ENSG00000120075 | HOXB5    | 124.243 | 1.806  | 0.203 | 8.905  | 5.36E-19 | 4.96E-17 | no |
| ENSG00000170456 | DENND5B  | 84.317  | 1.677  | 0.189 | 8.895  | 5.84E-19 | 5.37E-17 | no |
| ENSG00000164056 | SPRY1    | 56.897  | 2.121  | 0.239 | 8.889  | 6.16E-19 | 5.62E-17 | no |
| ENSG00000189223 | PAX8-AS1 | 23.365  | 2.566  | 0.289 | 8.885  | 6.36E-19 | 5.77E-17 | no |
| ENSG00000113070 | HBEGF    | 84.188  | 1.641  | 0.185 | 8.873  | 7.13E-19 | 6.42E-17 | no |
| ENSG00000103257 | SLC7A5   | 205.448 | 1.310  | 0.148 | 8.862  | 7.88E-19 | 7.00E-17 | no |
| ENSG00000101255 | TRIB3    | 93.875  | 1.442  | 0.163 | 8.849  | 8.83E-19 | 7.79E-17 | no |
| ENSG00000196154 | S100A4   | 374.271 | 1.001  | 0.114 | 8.800  | 1.36E-18 | 1.19E-16 | no |
| ENSG00000133321 | PLAAT4   | 16.122  | 3.691  | 0.420 | 8.791  | 1.49E-18 | 1.29E-16 | no |
| ENSG00000048052 | HDAC9    | 42.298  | 2.008  | 0.230 | 8.722  | 2.73E-18 | 2.35E-16 | no |
| ENSG00000139734 | DIAPH3   | 165.776 | -0.981 | 0.113 | -8.700 | 3.31E-18 | 2.83E-16 | no |
| ENSG00000156273 | BACH1    | 36.013  | 1.897  | 0.218 | 8.684  | 3.83E-18 | 3.25E-16 | no |
| ENSG00000157259 | GATAD1   | 142.325 | 1.122  | 0.130 | 8.655  | 4.92E-18 | 4.12E-16 | no |
| ENSG00000132963 | POMP     | 312.055 | -0.839 | 0.097 | -8.624 | 6.48E-18 | 5.40E-16 | no |
| ENSG00000115541 | HSPE1    | 436.385 | -1.178 | 0.137 | -8.575 | 9.90E-18 | 8.14E-16 | no |
| ENSG00000113558 | SKP1     | 372.482 | -0.719 | 0.084 | -8.568 | 1.05E-17 | 8.62E-16 | no |
| ENSG00000126934 | MAP2K2   | 233.020 | 1.088  | 0.128 | 8.496  | 1.97E-17 | 1.58E-15 | no |
| ENSG00000171848 | RRM2     | 195.899 | -1.086 | 0.129 | -8.399 | 4.51E-17 | 3.58E-15 | no |
| ENSG00000013810 | TACC3    | 177.724 | -1.045 | 0.125 | -8.375 | 5.51E-17 | 4.34E-15 | no |
| ENSG00000141367 | CLTC     | 450.783 | -0.766 | 0.092 | -8.364 | 6.08E-17 | 4.77E-15 | no |
| ENSG00000271503 | CCL5     | 10.729  | 4.276  | 0.514 | 8.315  | 9.16E-17 | 7.14E-15 | no |
| ENSG00000128965 | CHAC1    | 50.149  | 1.811  | 0.218 | 8.310  | 9.59E-17 | 7.43E-15 | no |
| ENSG00000135373 | EHF      | 65.538  | 1.475  | 0.178 | 8.306  | 9.87E-17 | 7.60E-15 | no |
| ENSG00000145555 | MYO10    | 222.900 | 0.894  | 0.108 | 8.276  | 1.27E-16 | 9.68E-15 | no |
| ENSG00000163840 | DTX3L    | 118.707 | 1.075  | 0.131 | 8.230  | 1.87E-16 | 1.42E-14 | no |
| ENSG00000116062 | MSH6     | 248.140 | -0.735 | 0.089 | -8.222 | 2.00E-16 | 1.50E-14 | no |
| ENSG00000117472 | TSPAN1   | 34.754  | 1.945  | 0.238 | 8.171  | 3.06E-16 | 2.29E-14 | no |
| ENSG00000081041 | CXCL2    | 15.145  | 3.573  | 0.438 | 8.167  | 3.16E-16 | 2.35E-14 | no |
| ENSG00000109971 | HSPA8    | 626.495 | -0.818 | 0.100 | -8.159 | 3.38E-16 | 2.50E-14 | no |
| ENSG00000133119 | RFC3     | 119.447 | -1.068 | 0.132 | -8.119 | 4.69E-16 | 3.45E-14 | no |

|                 |          |         |        |       |        |          |          |    |
|-----------------|----------|---------|--------|-------|--------|----------|----------|----|
| ENSG00000165527 | ARF6     | 204.730 | 0.824  | 0.102 | 8.076  | 6.69E-16 | 4.87E-14 | no |
| ENSG00000166710 | B2M      | 978.148 | 0.832  | 0.103 | 8.077  | 6.66E-16 | 4.87E-14 | no |
| ENSG00000124145 | SDC4     | 197.324 | 1.021  | 0.127 | 8.054  | 8.00E-16 | 5.76E-14 | no |
| ENSG00000143621 | ILF2     | 235.968 | -0.918 | 0.114 | -8.027 | 1.00E-15 | 7.17E-14 | no |
| ENSG00000169710 | FASN     | 324.998 | -0.752 | 0.094 | -8.016 | 1.09E-15 | 7.76E-14 | no |
| ENSG00000106546 | AHR      | 34.028  | -3.632 | 0.453 | -8.012 | 1.13E-15 | 7.98E-14 | no |
| ENSG00000104738 | MCM4     | 265.707 | -1.018 | 0.127 | -8.006 | 1.19E-15 | 8.36E-14 | no |
| ENSG00000140941 | MAP1LC3B | 177.454 | 0.956  | 0.119 | 8.001  | 1.24E-15 | 8.69E-14 | no |
| ENSG00000187098 | MITF     | 30.326  | -2.968 | 0.371 | -7.993 | 1.32E-15 | 9.21E-14 | no |
| ENSG00000163762 | TM4SF18  | 46.887  | 1.691  | 0.212 | 7.963  | 1.68E-15 | 1.16E-13 | no |
| ENSG00000140403 | DNAJA4   | 13.262  | 4.215  | 0.531 | 7.932  | 2.16E-15 | 1.49E-13 | no |
| ENSG00000242195 | SRRM1P2  | 67.808  | -1.716 | 0.217 | -7.896 | 2.89E-15 | 1.97E-13 | no |
| ENSG00000143476 | DTL      | 84.056  | -1.279 | 0.163 | -7.849 | 4.18E-15 | 2.84E-13 | no |
| ENSG00000196950 | SLC39A10 | 164.831 | 1.083  | 0.139 | 7.804  | 5.98E-15 | 4.02E-13 | no |
| ENSG00000117298 | ECE1     | 369.130 | 0.896  | 0.115 | 7.795  | 6.42E-15 | 4.30E-13 | no |
| ENSG00000077782 | FGFR1    | 75.197  | -1.199 | 0.154 | -7.791 | 6.64E-15 | 4.42E-13 | no |
| ENSG00000087586 | AURKA    | 238.063 | -0.809 | 0.104 | -7.745 | 9.52E-15 | 6.25E-13 | no |
| ENSG00000204592 | HLA-E    | 133.737 | 0.926  | 0.120 | 7.734  | 1.04E-14 | 6.81E-13 | no |
| ENSG00000273706 | LHX1     | 127.982 | -1.036 | 0.134 | -7.732 | 1.06E-14 | 6.90E-13 | no |
| ENSG00000143815 | LBR      | 116.641 | -1.106 | 0.143 | -7.710 | 1.26E-14 | 8.14E-13 | no |
| ENSG00000071575 | TRIB2    | 48.093  | 1.862  | 0.242 | 7.695  | 1.41E-14 | 9.05E-13 | no |
| ENSG00000180530 | NRIP1    | 64.931  | -1.982 | 0.258 | -7.688 | 1.49E-14 | 9.51E-13 | no |
| ENSG00000121060 | TRIM25   | 157.347 | 0.918  | 0.120 | 7.670  | 1.72E-14 | 1.08E-12 | no |
| ENSG00000197121 | PGAP1    | 33.980  | 2.308  | 0.301 | 7.660  | 1.86E-14 | 1.17E-12 | no |
| ENSG00000221869 | CEBPD    | 36.952  | 2.162  | 0.283 | 7.647  | 2.06E-14 | 1.29E-12 | no |
| ENSG00000100219 | XBP1     | 99.308  | 1.090  | 0.143 | 7.646  | 2.08E-14 | 1.29E-12 | no |
| ENSG00000153815 | CMIP     | 211.814 | 0.818  | 0.107 | 7.642  | 2.13E-14 | 1.32E-12 | no |
| ENSG00000111335 | OAS2     | 11.094  | 3.836  | 0.503 | 7.630  | 2.34E-14 | 1.44E-12 | no |
| ENSG00000151849 | CENPJ    | 80.286  | -1.185 | 0.155 | -7.629 | 2.37E-14 | 1.45E-12 | no |
| ENSG00000113368 | LMNB1    | 188.127 | -0.956 | 0.125 | -7.621 | 2.52E-14 | 1.53E-12 | no |
| ENSG00000116161 | CACYBP   | 236.816 | -0.856 | 0.113 | -7.593 | 3.13E-14 | 1.90E-12 | no |
| ENSG00000137285 | TUBB2B   | 36.388  | 3.168  | 0.418 | 7.586  | 3.29E-14 | 1.97E-12 | no |
| ENSG00000171365 | CLCN5    | 65.549  | 1.355  | 0.179 | 7.571  | 3.71E-14 | 2.20E-12 | no |
| ENSG00000175592 | FOSL1    | 173.942 | 1.125  | 0.149 | 7.563  | 3.95E-14 | 2.34E-12 | no |
| ENSG00000102189 | EEA1     | 190.571 | 0.965  | 0.128 | 7.544  | 4.55E-14 | 2.68E-12 | no |
| ENSG00000123975 | CKS2     | 131.251 | -1.027 | 0.136 | -7.540 | 4.69E-14 | 2.75E-12 | no |
| ENSG00000164543 | STK17A   | 150.731 | 0.914  | 0.121 | 7.533  | 4.95E-14 | 2.89E-12 | no |
| ENSG00000070669 | ASNS     | 152.013 | 0.948  | 0.126 | 7.500  | 6.40E-14 | 3.71E-12 | no |
| ENSG00000077152 | UBE2T    | 51.482  | -1.947 | 0.260 | -7.497 | 6.54E-14 | 3.77E-12 | no |
| ENSG00000002079 | MYH16    | 15.842  | 2.425  | 0.324 | 7.495  | 6.65E-14 | 3.80E-12 | no |
| ENSG00000144824 | PHLDB2   | 638.499 | 0.758  | 0.101 | 7.492  | 6.76E-14 | 3.85E-12 | no |
| ENSG00000143799 | PARP1    | 330.206 | -0.758 | 0.101 | -7.487 | 7.03E-14 | 3.98E-12 | no |
| ENSG00000184900 | SUMO3    | 279.482 | 0.717  | 0.096 | 7.453  | 9.15E-14 | 5.14E-12 | no |

|                 |          |         |        |       |        |          |          |    |
|-----------------|----------|---------|--------|-------|--------|----------|----------|----|
| ENSG00000074211 | PPP2R2C  | 45.950  | -1.432 | 0.192 | -7.439 | 1.01E-13 | 5.67E-12 | no |
| ENSG00000163171 | CDC42EP3 | 248.106 | -1.010 | 0.136 | -7.436 | 1.04E-13 | 5.78E-12 | no |
| ENSG00000101911 | PRPS2    | 87.199  | -1.143 | 0.154 | -7.416 | 1.21E-13 | 6.70E-12 | no |
| ENSG00000162733 | DDR2     | 96.566  | 1.247  | 0.169 | 7.391  | 1.45E-13 | 8.01E-12 | no |
| ENSG00000169429 | CXCL8    | 28.413  | 3.062  | 0.415 | 7.371  | 1.69E-13 | 9.22E-12 | no |
| ENSG00000089685 | BIRC5    | 246.593 | -0.847 | 0.115 | -7.368 | 1.74E-13 | 9.44E-12 | no |
| ENSG00000112984 | KIF20A   | 59.365  | -1.578 | 0.215 | -7.357 | 1.88E-13 | 1.02E-11 | no |
| ENSG00000142945 | KIF2C    | 103.691 | -1.069 | 0.146 | -7.317 | 2.54E-13 | 1.36E-11 | no |
| ENSG00000088826 | SMOX     | 40.989  | 1.423  | 0.196 | 7.262  | 3.82E-13 | 2.03E-11 | no |
| ENSG00000042493 | CAPG     | 133.883 | 1.400  | 0.193 | 7.246  | 4.30E-13 | 2.27E-11 | no |
| ENSG00000109452 | INPP4B   | 21.944  | 2.739  | 0.379 | 7.237  | 4.57E-13 | 2.41E-11 | no |
| ENSG00000130589 | HELZ2    | 82.030  | 1.071  | 0.148 | 7.236  | 4.63E-13 | 2.43E-11 | no |
| ENSG00000188549 | CCDC9B   | 42.417  | 1.516  | 0.210 | 7.211  | 5.55E-13 | 2.89E-11 | no |
| ENSG00000089127 | OAS1     | 10.147  | 4.471  | 0.620 | 7.211  | 5.55E-13 | 2.89E-11 | no |
| ENSG00000154134 | ROBO3    | 34.176  | 1.827  | 0.253 | 7.208  | 5.68E-13 | 2.94E-11 | no |
| ENSG00000184349 | EFNA5    | 53.554  | -1.646 | 0.228 | -7.207 | 5.72E-13 | 2.96E-11 | no |
| ENSG00000136108 | CKAP2    | 229.587 | -0.804 | 0.112 | -7.204 | 5.83E-13 | 3.00E-11 | no |
| ENSG00000105327 | BBC3     | 113.295 | 1.105  | 0.154 | 7.166  | 7.72E-13 | 3.91E-11 | no |
| ENSG00000106278 | PTPRZ1   | 19.690  | 2.598  | 0.363 | 7.166  | 7.70E-13 | 3.91E-11 | no |
| ENSG00000122034 | GTF3A    | 207.096 | -0.747 | 0.105 | -7.128 | 1.02E-12 | 5.10E-11 | no |
| ENSG00000018408 | WWTR1    | 340.848 | 0.707  | 0.099 | 7.114  | 1.12E-12 | 5.59E-11 | no |
| ENSG00000123066 | MED13L   | 161.992 | 1.135  | 0.160 | 7.101  | 1.23E-12 | 6.07E-11 | no |
| ENSG00000144118 | RALB     | 147.436 | 0.949  | 0.134 | 7.102  | 1.23E-12 | 6.07E-11 | no |
| ENSG00000051108 | HERPUD1  | 68.204  | 1.309  | 0.184 | 7.097  | 1.28E-12 | 6.25E-11 | no |
| ENSG00000132386 | SERPINF1 | 18.415  | 2.250  | 0.318 | 7.081  | 1.43E-12 | 6.99E-11 | no |
| ENSG00000100906 | NFKBIA   | 387.539 | 0.822  | 0.116 | 7.058  | 1.69E-12 | 8.22E-11 | no |
| ENSG00000136193 | SCRN1    | 139.297 | 1.176  | 0.167 | 7.056  | 1.71E-12 | 8.29E-11 | no |
| ENSG00000269190 | FBXO17   | 119.984 | 1.126  | 0.160 | 7.042  | 1.89E-12 | 9.12E-11 | no |
| ENSG00000221963 | APOL6    | 42.562  | 1.499  | 0.213 | 7.027  | 2.11E-12 | 1.01E-10 | no |
| ENSG00000198707 | CEP290   | 166.470 | 0.801  | 0.114 | 7.028  | 2.09E-12 | 1.01E-10 | no |
| ENSG00000180263 | FGD6     | 56.912  | 1.430  | 0.203 | 7.028  | 2.10E-12 | 1.01E-10 | no |
| ENSG00000113658 | SMAD5    | 189.942 | -0.743 | 0.106 | -7.004 | 2.49E-12 | 1.19E-10 | no |
| ENSG00000117868 | ESYT2    | 123.129 | 0.933  | 0.133 | 6.998  | 2.59E-12 | 1.23E-10 | no |
| ENSG00000170035 | UBE2E3   | 82.739  | 1.245  | 0.178 | 6.997  | 2.61E-12 | 1.23E-10 | no |
| ENSG00000154518 | ATP5MC3  | 458.225 | -0.721 | 0.104 | -6.962 | 3.35E-12 | 1.56E-10 | no |
| ENSG00000082516 | GEMIN5   | 131.756 | -0.750 | 0.108 | -6.955 | 3.52E-12 | 1.64E-10 | no |
| ENSG00000204397 | CARD16   | 23.929  | -1.958 | 0.283 | -6.922 | 4.44E-12 | 2.06E-10 | no |
| ENSG00000184584 | STING1   | 14.626  | 3.882  | 0.561 | 6.917  | 4.62E-12 | 2.14E-10 | no |
| ENSG00000151491 | EPS8     | 70.878  | 2.074  | 0.300 | 6.911  | 4.83E-12 | 2.22E-10 | no |
| ENSG00000101782 | RIOK3    | 126.725 | 0.947  | 0.137 | 6.907  | 4.96E-12 | 2.28E-10 | no |
| ENSG00000171316 | CHD7     | 136.525 | 1.014  | 0.147 | 6.892  | 5.52E-12 | 2.53E-10 | no |
| ENSG00000067066 | SP100    | 97.485  | 0.908  | 0.132 | 6.882  | 5.92E-12 | 2.70E-10 | no |
| ENSG00000125826 | RBCK1    | 179.947 | 0.795  | 0.115 | 6.880  | 5.97E-12 | 2.71E-10 | no |

|                 |           |         |        |       |        |          |          |    |
|-----------------|-----------|---------|--------|-------|--------|----------|----------|----|
| ENSG00000198700 | IPO9      | 230.129 | -0.755 | 0.110 | -6.874 | 6.24E-12 | 2.83E-10 | no |
| ENSG00000141447 | OSBPL1A   | 98.405  | 0.919  | 0.134 | 6.849  | 7.42E-12 | 3.34E-10 | no |
| ENSG00000083642 | PDS5B     | 139.989 | -0.882 | 0.129 | -6.836 | 8.12E-12 | 3.64E-10 | no |
| ENSG00000131495 | NDUFA2    | 138.899 | -0.849 | 0.124 | -6.830 | 8.48E-12 | 3.78E-10 | no |
| ENSG00000049249 | TNFRSF9   | 14.223  | 2.432  | 0.356 | 6.830  | 8.49E-12 | 3.78E-10 | no |
| ENSG00000149485 | FADS1     | 149.671 | 1.079  | 0.158 | 6.826  | 8.70E-12 | 3.87E-10 | no |
| ENSG00000171320 | ESCO2     | 52.428  | -1.220 | 0.179 | -6.817 | 9.32E-12 | 4.11E-10 | no |
| ENSG00000196914 | ARHGEF12  | 155.821 | 0.874  | 0.128 | 6.816  | 9.36E-12 | 4.12E-10 | no |
| ENSG00000175582 | RAB6A     | 110.182 | 0.991  | 0.145 | 6.808  | 9.87E-12 | 4.33E-10 | no |
| ENSG00000182809 | CRIP2     | 81.013  | -1.293 | 0.190 | -6.796 | 1.07E-11 | 4.69E-10 | no |
| ENSG00000113048 | MRPS27    | 121.607 | -0.932 | 0.137 | -6.795 | 1.08E-11 | 4.71E-10 | no |
| ENSG00000117399 | CDC20     | 204.479 | -0.706 | 0.104 | -6.786 | 1.15E-11 | 4.98E-10 | no |
| ENSG00000118640 | VAMP8     | 41.593  | 2.253  | 0.333 | 6.765  | 1.34E-11 | 5.74E-10 | no |
| ENSG00000184743 | ATL3      | 94.323  | 1.277  | 0.189 | 6.758  | 1.40E-11 | 5.98E-10 | no |
| ENSG00000133657 | ATP13A3   | 308.027 | -0.724 | 0.107 | -6.745 | 1.53E-11 | 6.53E-10 | no |
| ENSG00000125740 | FOSB      | 67.021  | 1.344  | 0.200 | 6.732  | 1.68E-11 | 7.12E-10 | no |
| ENSG00000230453 | ANKRD18B  | 14.998  | 2.259  | 0.336 | 6.724  | 1.77E-11 | 7.50E-10 | no |
| ENSG00000090266 | NDUFB2    | 200.303 | -0.803 | 0.120 | -6.671 | 2.55E-11 | 1.07E-09 | no |
| ENSG00000134954 | ETS1      | 77.960  | 1.192  | 0.179 | 6.658  | 2.78E-11 | 1.16E-09 | no |
| ENSG00000094804 | CDC6      | 77.746  | -1.190 | 0.179 | -6.653 | 2.88E-11 | 1.20E-09 | no |
| ENSG00000135378 | PRRG4     | 33.113  | 1.877  | 0.283 | 6.638  | 3.18E-11 | 1.31E-09 | no |
| ENSG00000112118 | MCM3      | 169.595 | -0.779 | 0.118 | -6.631 | 3.33E-11 | 1.37E-09 | no |
| ENSG00000043039 | BARX2     | 14.526  | 2.401  | 0.363 | 6.624  | 3.49E-11 | 1.43E-09 | no |
| ENSG00000176890 | TYMS      | 127.292 | -0.851 | 0.128 | -6.620 | 3.60E-11 | 1.47E-09 | no |
| ENSG00000188290 | HES4      | 33.677  | 1.877  | 0.284 | 6.607  | 3.91E-11 | 1.59E-09 | no |
| ENSG00000173575 | CHD2      | 161.735 | 0.801  | 0.121 | 6.601  | 4.08E-11 | 1.65E-09 | no |
| ENSG00000071539 | TRIP13    | 71.742  | -1.045 | 0.158 | -6.594 | 4.27E-11 | 1.72E-09 | no |
| ENSG00000087074 | PPP1R15A  | 162.218 | 0.995  | 0.151 | 6.591  | 4.38E-11 | 1.76E-09 | no |
| ENSG00000130303 | BST2      | 32.864  | 2.430  | 0.369 | 6.590  | 4.41E-11 | 1.77E-09 | no |
| ENSG00000250072 | SH3TC2-DT | 61.923  | 1.232  | 0.187 | 6.579  | 4.75E-11 | 1.89E-09 | no |
| ENSG00000175197 | DDIT3     | 88.801  | 1.309  | 0.200 | 6.559  | 5.42E-11 | 2.16E-09 | no |
| ENSG00000122026 | RPL21     | 574.659 | -0.814 | 0.124 | -6.557 | 5.47E-11 | 2.17E-09 | no |
| ENSG00000023191 | RNH1      | 160.440 | 0.736  | 0.112 | 6.551  | 5.71E-11 | 2.26E-09 | no |
| ENSG00000196368 | NUDT11    | 21.822  | -2.083 | 0.318 | -6.544 | 5.97E-11 | 2.35E-09 | no |
| ENSG00000151748 | SAV1      | 98.316  | 1.102  | 0.169 | 6.529  | 6.63E-11 | 2.61E-09 | no |
| ENSG00000112096 | SOD2      | 68.304  | 1.068  | 0.164 | 6.513  | 7.36E-11 | 2.89E-09 | no |
| ENSG00000180914 | OXTR      | 12.378  | 2.738  | 0.421 | 6.500  | 8.05E-11 | 3.14E-09 | no |
| ENSG00000182919 | C11orf54  | 50.427  | 1.463  | 0.225 | 6.498  | 8.16E-11 | 3.18E-09 | no |
| ENSG00000189143 | CLDN4     | 249.231 | 0.887  | 0.137 | 6.490  | 8.56E-11 | 3.31E-09 | no |
| ENSG00000184661 | CDCA2     | 114.754 | -0.847 | 0.131 | -6.488 | 8.68E-11 | 3.35E-09 | no |
| ENSG00000175352 | NRIP3     | 28.439  | 2.226  | 0.344 | 6.471  | 9.75E-11 | 3.74E-09 | no |
| ENSG00000134690 | CDCA8     | 123.364 | -0.843 | 0.130 | -6.467 | 9.99E-11 | 3.82E-09 | no |
| ENSG00000164442 | CITED2    | 43.511  | 2.443  | 0.378 | 6.459  | 1.06E-10 | 4.02E-09 | no |

|                 |           |         |        |       |        |          |          |    |
|-----------------|-----------|---------|--------|-------|--------|----------|----------|----|
| ENSG00000128272 | ATF4      | 469.272 | 0.886  | 0.137 | 6.452  | 1.10E-10 | 4.17E-09 | no |
| ENSG00000115415 | STAT1     | 161.309 | 0.776  | 0.120 | 6.450  | 1.12E-10 | 4.22E-09 | no |
| ENSG00000124201 | ZNF1      | 146.862 | 0.888  | 0.138 | 6.450  | 1.12E-10 | 4.22E-09 | no |
| ENSG00000138166 | DUSP5     | 54.294  | 3.096  | 0.481 | 6.433  | 1.25E-10 | 4.70E-09 | no |
| ENSG00000112715 | VEGFA     | 117.858 | 1.010  | 0.157 | 6.428  | 1.29E-10 | 4.83E-09 | no |
| ENSG00000172183 | ISG20     | 22.432  | 1.817  | 0.283 | 6.422  | 1.34E-10 | 5.00E-09 | no |
| ENSG00000126524 | SBDS      | 189.053 | 0.740  | 0.115 | 6.422  | 1.35E-10 | 5.01E-09 | no |
| ENSG00000028203 | VEZT      | 121.229 | 0.862  | 0.134 | 6.421  | 1.36E-10 | 5.04E-09 | no |
| ENSG00000167703 | SLC43A2   | 19.583  | -1.908 | 0.298 | -6.411 | 1.44E-10 | 5.33E-09 | no |
| ENSG00000172216 | CEBPB     | 103.452 | 1.246  | 0.195 | 6.404  | 1.51E-10 | 5.54E-09 | no |
| ENSG00000104856 | RELB      | 44.676  | 1.444  | 0.226 | 6.385  | 1.71E-10 | 6.27E-09 | no |
| ENSG00000110422 | HIPK3     | 68.229  | 1.242  | 0.195 | 6.377  | 1.81E-10 | 6.57E-09 | no |
| ENSG00000168610 | STAT3     | 219.845 | 0.975  | 0.153 | 6.373  | 1.85E-10 | 6.71E-09 | no |
| ENSG00000023171 | GRAMD1B   | 25.689  | -1.691 | 0.266 | -6.363 | 1.98E-10 | 7.15E-09 | no |
| ENSG00000163565 | IFI16     | 45.342  | 2.109  | 0.333 | 6.335  | 2.38E-10 | 8.53E-09 | no |
| ENSG00000169679 | BUB1      | 150.409 | -0.763 | 0.121 | -6.317 | 2.67E-10 | 9.56E-09 | no |
| ENSG00000171604 | CXXC5     | 96.837  | -1.325 | 0.210 | -6.315 | 2.70E-10 | 9.64E-09 | no |
| ENSG00000169230 | PRELID1   | 255.705 | -0.710 | 0.113 | -6.312 | 2.76E-10 | 9.83E-09 | no |
| ENSG00000214900 | LINC01588 | 19.829  | 1.878  | 0.298 | 6.308  | 2.83E-10 | 1.00E-08 | no |
| ENSG00000152422 | XRCC4     | 68.626  | -1.048 | 0.166 | -6.293 | 3.10E-10 | 1.10E-08 | no |
| ENSG00000253276 | CCDC71L   | 212.122 | -1.583 | 0.252 | -6.285 | 3.29E-10 | 1.16E-08 | no |
| ENSG00000126787 | DLGAP5    | 162.879 | -0.769 | 0.122 | -6.279 | 3.40E-10 | 1.19E-08 | no |
| ENSG00000161888 | SPC24     | 32.411  | -1.837 | 0.294 | -6.247 | 4.18E-10 | 1.45E-08 | no |
| ENSG00000133789 | SWAP70    | 126.302 | 0.866  | 0.139 | 6.248  | 4.14E-10 | 1.45E-08 | no |
| ENSG00000145358 | DDIT4L    | 12.735  | -2.613 | 0.419 | -6.239 | 4.42E-10 | 1.53E-08 | no |
| ENSG00000139618 | BRCA2     | 119.148 | -0.822 | 0.132 | -6.233 | 4.57E-10 | 1.58E-08 | no |
| ENSG00000186472 | PCLO      | 25.715  | -2.169 | 0.348 | -6.233 | 4.59E-10 | 1.58E-08 | no |
| ENSG00000169247 | SH3TC2    | 20.910  | 1.871  | 0.301 | 6.213  | 5.20E-10 | 1.79E-08 | no |
| ENSG00000198626 | RYR2      | 46.657  | -1.731 | 0.279 | -6.209 | 5.32E-10 | 1.83E-08 | no |
| ENSG00000224099 | n/a       | 21.881  | 2.260  | 0.364 | 6.202  | 5.57E-10 | 1.91E-08 | no |
| ENSG00000166803 | PCLAF     | 201.781 | -0.813 | 0.131 | -6.192 | 5.95E-10 | 2.02E-08 | no |
| ENSG00000060982 | BCAT1     | 85.424  | 1.272  | 0.206 | 6.185  | 6.21E-10 | 2.10E-08 | no |
| ENSG00000183696 | UPP1      | 123.541 | 1.098  | 0.178 | 6.185  | 6.20E-10 | 2.10E-08 | no |
| ENSG00000186660 | ZFP91     | 190.988 | 0.781  | 0.127 | 6.161  | 7.23E-10 | 2.44E-08 | no |
| ENSG00000135365 | PHF21A    | 93.691  | 0.891  | 0.145 | 6.130  | 8.78E-10 | 2.95E-08 | no |
| ENSG00000139437 | TCHP      | 81.959  | 1.000  | 0.163 | 6.119  | 9.42E-10 | 3.15E-08 | no |
| ENSG00000116857 | TMEM9     | 77.011  | -0.893 | 0.146 | -6.116 | 9.58E-10 | 3.20E-08 | no |
| ENSG00000186480 | INSIG1    | 79.028  | -1.155 | 0.189 | -6.111 | 9.92E-10 | 3.30E-08 | no |
| ENSG00000129534 | MIS18BP1  | 174.401 | -0.709 | 0.116 | -6.110 | 9.94E-10 | 3.30E-08 | no |
| ENSG00000166432 | ZMAT1     | 25.245  | 1.671  | 0.274 | 6.104  | 1.04E-09 | 3.44E-08 | no |
| ENSG00000031698 | SARS1     | 311.467 | 0.785  | 0.129 | 6.077  | 1.22E-09 | 4.03E-08 | no |
| ENSG00000169871 | TRIM56    | 68.286  | 1.147  | 0.189 | 6.075  | 1.24E-09 | 4.06E-08 | no |
| ENSG00000090615 | GOLGA3    | 139.150 | 0.713  | 0.118 | 6.056  | 1.40E-09 | 4.56E-08 | no |



|                 |           |         |        |       |        |          |          |    |
|-----------------|-----------|---------|--------|-------|--------|----------|----------|----|
| ENSG00000164463 | CREBRF    | 90.515  | 0.865  | 0.143 | 6.053  | 1.42E-09 | 4.62E-08 | no |
| ENSG00000156587 | UBE2L6    | 28.588  | 1.492  | 0.247 | 6.053  | 1.42E-09 | 4.63E-08 | no |
| ENSG00000171680 | PLEKHG5   | 44.883  | 1.432  | 0.238 | 6.026  | 1.68E-09 | 5.42E-08 | no |
| ENSG00000152253 | SPC25     | 45.282  | -1.171 | 0.195 | -6.021 | 1.74E-09 | 5.59E-08 | no |
| ENSG00000140350 | ANP32A    | 238.862 | -0.727 | 0.121 | -6.018 | 1.76E-09 | 5.65E-08 | no |
| ENSG00000198742 | SMURF1    | 46.395  | 1.355  | 0.226 | 6.007  | 1.89E-09 | 6.05E-08 | no |
| ENSG00000082641 | NFE2L1    | 109.271 | 0.844  | 0.142 | 5.953  | 2.64E-09 | 8.37E-08 | no |
| ENSG00000182568 | SATB1     | 14.531  | 2.100  | 0.353 | 5.941  | 2.84E-09 | 8.93E-08 | no |
| ENSG00000091317 | CMTM6     | 169.194 | 0.886  | 0.149 | 5.938  | 2.89E-09 | 9.09E-08 | no |
| ENSG00000107438 | PDLIM1    | 80.576  | 1.385  | 0.233 | 5.935  | 2.94E-09 | 9.20E-08 | no |
| ENSG00000166801 | FAM111A   | 94.142  | 1.034  | 0.174 | 5.931  | 3.02E-09 | 9.44E-08 | no |
| ENSG00000156384 | SFR1      | 26.567  | 1.447  | 0.244 | 5.929  | 3.04E-09 | 9.48E-08 | no |
| ENSG00000275342 | PRAG1     | 27.782  | 2.138  | 0.361 | 5.924  | 3.14E-09 | 9.75E-08 | no |
| ENSG00000080503 | SMARCA2   | 36.959  | 1.967  | 0.332 | 5.922  | 3.18E-09 | 9.82E-08 | no |
| ENSG00000117586 | TNFSF4    | 15.978  | -3.074 | 0.519 | -5.922 | 3.18E-09 | 9.82E-08 | no |
| ENSG00000171552 | BCL2L1    | 63.262  | 1.539  | 0.261 | 5.904  | 3.55E-09 | 1.08E-07 | no |
| ENSG00000138347 | MYPN      | 75.149  | -0.871 | 0.147 | -5.904 | 3.56E-09 | 1.08E-07 | no |
| ENSG00000107554 | DNMBP     | 51.518  | 1.329  | 0.225 | 5.903  | 3.58E-09 | 1.09E-07 | no |
| ENSG00000136051 | WASHC4    | 103.437 | 0.871  | 0.148 | 5.892  | 3.81E-09 | 1.15E-07 | no |
| ENSG00000080823 | MOK       | 402.390 | 0.847  | 0.144 | 5.887  | 3.94E-09 | 1.19E-07 | no |
| ENSG00000073417 | PDE8A     | 32.483  | 1.563  | 0.266 | 5.879  | 4.12E-09 | 1.23E-07 | no |
| ENSG00000173141 | MRPL57    | 100.928 | -0.729 | 0.124 | -5.878 | 4.16E-09 | 1.24E-07 | no |
| ENSG00000237187 | NR2F1-AS1 | 24.194  | 1.945  | 0.331 | 5.871  | 4.33E-09 | 1.29E-07 | no |
| ENSG00000166340 | TPP1      | 99.954  | 0.948  | 0.162 | 5.854  | 4.80E-09 | 1.42E-07 | no |
| ENSG00000185022 | MAFF      | 67.239  | 1.125  | 0.192 | 5.853  | 4.82E-09 | 1.43E-07 | no |
| ENSG00000143153 | ATP1B1    | 231.955 | 0.914  | 0.156 | 5.851  | 4.89E-09 | 1.44E-07 | no |
| ENSG00000075218 | GTSE1     | 76.992  | -1.018 | 0.174 | -5.849 | 4.95E-09 | 1.46E-07 | no |
| ENSG00000143248 | RGSS      | 301.565 | -0.713 | 0.122 | -5.848 | 4.98E-09 | 1.46E-07 | no |
| ENSG00000156970 | BUB1B     | 93.113  | -0.966 | 0.165 | -5.844 | 5.09E-09 | 1.49E-07 | no |
| ENSG00000260027 | HOXB7     | 44.567  | 1.695  | 0.290 | 5.841  | 5.20E-09 | 1.52E-07 | no |
| ENSG00000130513 | GDF15     | 369.813 | 0.814  | 0.139 | 5.840  | 5.23E-09 | 1.53E-07 | no |
| ENSG00000112983 | BRD8      | 164.067 | -0.751 | 0.129 | -5.835 | 5.38E-09 | 1.56E-07 | no |
| ENSG00000166548 | TK2       | 42.832  | 1.166  | 0.200 | 5.831  | 5.51E-09 | 1.60E-07 | no |
| ENSG00000111358 | GTF2H3    | 95.612  | 0.766  | 0.131 | 5.825  | 5.71E-09 | 1.65E-07 | no |
| ENSG00000072274 | TFRC      | 191.448 | -0.740 | 0.127 | -5.822 | 5.82E-09 | 1.68E-07 | no |
| ENSG00000100342 | APOL1     | 16.947  | 2.481  | 0.426 | 5.818  | 5.94E-09 | 1.71E-07 | no |
| ENSG00000120948 | TARDBP    | 89.722  | -0.911 | 0.158 | -5.786 | 7.23E-09 | 2.07E-07 | no |
| ENSG00000185306 | C12orf56  | 14.160  | 2.157  | 0.374 | 5.775  | 7.70E-09 | 2.20E-07 | no |
| ENSG00000065328 | MCM10     | 68.434  | -1.062 | 0.184 | -5.772 | 7.84E-09 | 2.24E-07 | no |
| ENSG00000074657 | ZNF532    | 24.275  | 2.083  | 0.362 | 5.757  | 8.54E-09 | 2.43E-07 | no |
| ENSG00000182095 | TNRC18    | 67.821  | 1.037  | 0.180 | 5.750  | 8.91E-09 | 2.52E-07 | no |
| ENSG00000013364 | MVP       | 48.713  | 1.336  | 0.232 | 5.749  | 9.00E-09 | 2.53E-07 | no |
| ENSG00000072682 | P4HA2     | 39.119  | -1.201 | 0.209 | -5.750 | 8.95E-09 | 2.53E-07 | no |

|                 |            |         |        |       |        |          |          |    |
|-----------------|------------|---------|--------|-------|--------|----------|----------|----|
| ENSG00000163507 | CIP2A      | 129.178 | -0.758 | 0.132 | -5.746 | 9.15E-09 | 2.57E-07 | no |
| ENSG00000175161 | CADM2      | 27.292  | 1.561  | 0.272 | 5.742  | 9.34E-09 | 2.62E-07 | no |
| ENSG00000182742 | HOXB4      | 44.562  | 1.987  | 0.346 | 5.742  | 9.36E-09 | 2.62E-07 | no |
| ENSG00000113594 | LIFR       | 46.563  | 1.273  | 0.222 | 5.742  | 9.37E-09 | 2.62E-07 | no |
| ENSG00000138642 | HERC6      | 13.369  | 2.158  | 0.376 | 5.739  | 9.55E-09 | 2.66E-07 | no |
| ENSG00000204388 | HSPA1B     | 44.149  | -1.554 | 0.271 | -5.738 | 9.61E-09 | 2.67E-07 | no |
| ENSG00000117650 | NEK2       | 85.914  | -0.952 | 0.166 | -5.734 | 9.80E-09 | 2.71E-07 | no |
| ENSG00000177200 | CHD9       | 146.038 | 0.711  | 0.124 | 5.732  | 9.92E-09 | 2.74E-07 | no |
| ENSG00000076382 | SPAG5      | 53.531  | -1.150 | 0.201 | -5.729 | 1.01E-08 | 2.79E-07 | no |
| ENSG00000176393 | RNPEP      | 80.926  | -1.037 | 0.181 | -5.726 | 1.03E-08 | 2.84E-07 | no |
| ENSG00000162772 | ATF3       | 50.449  | 1.624  | 0.284 | 5.724  | 1.04E-08 | 2.85E-07 | no |
| ENSG00000178397 | FAM220A    | 40.725  | 1.129  | 0.198 | 5.707  | 1.15E-08 | 3.15E-07 | no |
| ENSG00000091483 | FH         | 73.370  | -1.025 | 0.180 | -5.707 | 1.15E-08 | 3.15E-07 | no |
| ENSG00000168003 | SLC3A2     | 202.781 | 0.805  | 0.141 | 5.703  | 1.18E-08 | 3.22E-07 | no |
| ENSG00000076685 | NT5C2      | 100.661 | 1.019  | 0.179 | 5.696  | 1.22E-08 | 3.33E-07 | no |
| ENSG00000213465 | ARL2       | 82.328  | 0.892  | 0.157 | 5.693  | 1.25E-08 | 3.37E-07 | no |
| ENSG00000120885 | CLU        | 188.876 | -0.788 | 0.139 | -5.678 | 1.36E-08 | 3.66E-07 | no |
| ENSG00000198363 | ASPH       | 457.485 | -0.719 | 0.127 | -5.669 | 1.43E-08 | 3.82E-07 | no |
| ENSG00000096092 | TMEM14A    | 47.522  | -1.341 | 0.237 | -5.651 | 1.59E-08 | 4.23E-07 | no |
| ENSG00000254911 | SCARNA9    | 116.034 | 0.945  | 0.167 | 5.645  | 1.65E-08 | 4.39E-07 | no |
| ENSG00000130813 | SHFL       | 33.857  | 1.323  | 0.235 | 5.637  | 1.73E-08 | 4.57E-07 | no |
| ENSG00000114861 | FOXP1      | 43.371  | 1.220  | 0.217 | 5.629  | 1.81E-08 | 4.77E-07 | no |
| ENSG00000006459 | KDM7A      | 20.969  | 1.685  | 0.300 | 5.620  | 1.91E-08 | 5.02E-07 | no |
| ENSG00000085832 | EPS15      | 91.952  | 0.800  | 0.143 | 5.606  | 2.07E-08 | 5.40E-07 | no |
| ENSG00000142798 | HSPG2      | 37.566  | 1.306  | 0.233 | 5.604  | 2.09E-08 | 5.44E-07 | no |
| ENSG00000085662 | AKR1B1     | 93.028  | -0.784 | 0.140 | -5.603 | 2.11E-08 | 5.48E-07 | no |
| ENSG00000163359 | COL6A3     | 40.723  | 1.062  | 0.190 | 5.588  | 2.30E-08 | 5.93E-07 | no |
| ENSG00000177707 | NECTIN3    | 51.121  | -1.241 | 0.222 | -5.588 | 2.30E-08 | 5.93E-07 | no |
| ENSG00000125618 | PAX8       | 14.817  | 1.969  | 0.353 | 5.584  | 2.36E-08 | 6.06E-07 | no |
| ENSG00000249784 | SCARNA22   | 206.496 | 1.174  | 0.211 | 5.573  | 2.51E-08 | 6.43E-07 | no |
| ENSG00000131711 | MAP1B      | 180.795 | 0.989  | 0.178 | 5.566  | 2.60E-08 | 6.67E-07 | no |
| ENSG00000166833 | NAV2       | 92.301  | 1.260  | 0.227 | 5.561  | 2.69E-08 | 6.87E-07 | no |
| ENSG00000073111 | MCM2       | 123.079 | -1.070 | 0.192 | -5.557 | 2.74E-08 | 6.97E-07 | no |
| ENSG00000121310 | ECHDC2     | 52.107  | 1.206  | 0.217 | 5.555  | 2.77E-08 | 7.03E-07 | no |
| ENSG00000067798 | NAV3       | 25.808  | -1.669 | 0.301 | -5.547 | 2.91E-08 | 7.36E-07 | no |
| ENSG00000101187 | SLCO4A1    | 131.353 | 0.724  | 0.130 | 5.546  | 2.92E-08 | 7.37E-07 | no |
| ENSG00000177556 | ATOX1      | 111.648 | -0.789 | 0.142 | -5.545 | 2.94E-08 | 7.42E-07 | no |
| ENSG00000170776 | AKAP13     | 127.076 | 0.883  | 0.159 | 5.542  | 2.99E-08 | 7.52E-07 | no |
| ENSG00000137807 | KIF23      | 136.515 | -0.773 | 0.140 | -5.524 | 3.32E-08 | 8.33E-07 | no |
| ENSG00000079459 | FDFT1      | 113.034 | -0.737 | 0.133 | -5.523 | 3.33E-08 | 8.34E-07 | no |
| ENSG00000125864 | BFSP1      | 23.692  | 1.529  | 0.277 | 5.522  | 3.34E-08 | 8.36E-07 | no |
| ENSG00000269834 | ZNF528-AS1 | 20.385  | 1.790  | 0.325 | 5.513  | 3.52E-08 | 8.79E-07 | no |
| ENSG00000138496 | PARP9      | 33.877  | 1.232  | 0.224 | 5.510  | 3.58E-08 | 8.93E-07 | no |

|                 |           |          |        |       |        |          |          |    |
|-----------------|-----------|----------|--------|-------|--------|----------|----------|----|
| ENSG00000137812 | KNL1      | 117.039  | -0.814 | 0.149 | -5.478 | 4.30E-08 | 1.06E-06 | no |
| ENSG00000147854 | UHRF2     | 114.163  | 0.796  | 0.145 | 5.479  | 4.27E-08 | 1.06E-06 | no |
| ENSG00000109787 | KLF3      | 92.899   | 0.790  | 0.144 | 5.473  | 4.42E-08 | 1.08E-06 | no |
| ENSG00000125144 | MT1G      | 15.969   | -3.605 | 0.659 | -5.471 | 4.47E-08 | 1.09E-06 | no |
| ENSG00000106070 | GRB10     | 59.524   | 1.033  | 0.189 | 5.470  | 4.51E-08 | 1.10E-06 | no |
| ENSG00000197586 | ENTPD6    | 66.082   | 1.046  | 0.192 | 5.455  | 4.91E-08 | 1.19E-06 | no |
| ENSG00000110066 | KMT5B     | 94.765   | 0.846  | 0.155 | 5.455  | 4.90E-08 | 1.19E-06 | no |
| ENSG00000164626 | KCNK5     | 25.674   | 1.344  | 0.246 | 5.452  | 4.98E-08 | 1.21E-06 | no |
| ENSG00000197956 | S100A6    | 3011.598 | -0.917 | 0.168 | -5.452 | 4.99E-08 | 1.21E-06 | no |
| ENSG00000105971 | CAV2      | 108.654  | 1.113  | 0.205 | 5.442  | 5.27E-08 | 1.27E-06 | no |
| ENSG00000125347 | IRF1      | 57.214   | 0.948  | 0.175 | 5.433  | 5.53E-08 | 1.33E-06 | no |
| ENSG00000140044 | JDP2      | 23.587   | 1.620  | 0.298 | 5.431  | 5.59E-08 | 1.34E-06 | no |
| ENSG00000169021 | UQCRFS1   | 98.309   | -0.814 | 0.150 | -5.428 | 5.69E-08 | 1.37E-06 | no |
| ENSG00000064666 | CNN2      | 148.689  | -0.750 | 0.138 | -5.426 | 5.76E-08 | 1.38E-06 | no |
| ENSG00000114554 | PLXNA1    | 125.308  | -0.744 | 0.137 | -5.416 | 6.10E-08 | 1.46E-06 | no |
| ENSG00000164402 | SEPTIN8   | 61.608   | -0.924 | 0.171 | -5.413 | 6.21E-08 | 1.48E-06 | no |
| ENSG00000180537 | RNF182    | 24.381   | 1.714  | 0.317 | 5.403  | 6.56E-08 | 1.56E-06 | no |
| ENSG00000197324 | LRP10     | 162.335  | 0.866  | 0.160 | 5.395  | 6.87E-08 | 1.63E-06 | no |
| ENSG00000105953 | OGDH      | 109.040  | 0.755  | 0.140 | 5.391  | 7.01E-08 | 1.66E-06 | no |
| ENSG00000167644 | C19orf33  | 236.220  | 0.754  | 0.140 | 5.383  | 7.31E-08 | 1.73E-06 | no |
| ENSG00000104356 | POP1      | 83.398   | -0.923 | 0.171 | -5.383 | 7.33E-08 | 1.73E-06 | no |
| ENSG00000144426 | NBEAL1    | 55.999   | 1.116  | 0.208 | 5.374  | 7.71E-08 | 1.81E-06 | no |
| ENSG00000118503 | TNFAIP3   | 11.743   | 1.881  | 0.350 | 5.373  | 7.76E-08 | 1.82E-06 | no |
| ENSG00000171517 | LPAR3     | 23.627   | 1.395  | 0.260 | 5.369  | 7.93E-08 | 1.85E-06 | no |
| ENSG00000213593 | TMX2      | 92.281   | 0.946  | 0.176 | 5.365  | 8.08E-08 | 1.89E-06 | no |
| ENSG00000152465 | NMT2      | 127.566  | -0.710 | 0.132 | -5.361 | 8.29E-08 | 1.93E-06 | no |
| ENSG00000158805 | ZNF276    | 31.785   | 1.450  | 0.271 | 5.349  | 8.84E-08 | 2.05E-06 | no |
| ENSG00000188313 | PLSCR1    | 42.327   | 1.204  | 0.225 | 5.345  | 9.03E-08 | 2.09E-06 | no |
| ENSG00000137563 | GGH       | 49.991   | -1.268 | 0.238 | -5.330 | 9.81E-08 | 2.26E-06 | no |
| ENSG00000139112 | GABARAPL1 | 43.478   | 1.304  | 0.245 | 5.324  | 1.02E-07 | 2.34E-06 | no |
| ENSG00000125746 | EML2      | 93.110   | 0.840  | 0.158 | 5.316  | 1.06E-07 | 2.44E-06 | no |
| ENSG00000179862 | CITED4    | 53.884   | 1.064  | 0.200 | 5.312  | 1.09E-07 | 2.49E-06 | no |
| ENSG00000074319 | TSG101    | 79.307   | 0.920  | 0.174 | 5.292  | 1.21E-07 | 2.74E-06 | no |
| ENSG00000196584 | XRCC2     | 73.453   | -0.867 | 0.164 | -5.281 | 1.29E-07 | 2.90E-06 | no |
| ENSG00000168209 | DDIT4     | 132.698  | 1.065  | 0.202 | 5.279  | 1.30E-07 | 2.92E-06 | no |
| ENSG00000115758 | ODC1      | 211.288  | -0.729 | 0.138 | -5.269 | 1.37E-07 | 3.07E-06 | no |
| ENSG00000108509 | CAMTA2    | 33.220   | 1.189  | 0.226 | 5.265  | 1.40E-07 | 3.13E-06 | no |
| ENSG00000132842 | AP3B1     | 115.177  | -0.711 | 0.136 | -5.249 | 1.53E-07 | 3.40E-06 | no |
| ENSG00000183955 | KMT5A     | 90.998   | 0.808  | 0.154 | 5.243  | 1.58E-07 | 3.49E-06 | no |
| ENSG00000142875 | PRKACB    | 47.738   | -1.572 | 0.300 | -5.243 | 1.58E-07 | 3.49E-06 | no |
| ENSG00000197965 | MPZL1     | 83.896   | -0.842 | 0.161 | -5.241 | 1.59E-07 | 3.51E-06 | no |
| ENSG00000168078 | PBK       | 96.779   | -0.753 | 0.144 | -5.240 | 1.60E-07 | 3.53E-06 | no |
| ENSG00000070882 | OSBPL3    | 57.112   | 0.961  | 0.183 | 5.236  | 1.64E-07 | 3.59E-06 | no |

|                 |            |         |        |       |        |          |          |    |
|-----------------|------------|---------|--------|-------|--------|----------|----------|----|
| ENSG00000111665 | CDCA3      | 69.479  | -0.947 | 0.181 | -5.230 | 1.70E-07 | 3.70E-06 | no |
| ENSG00000069702 | TGFBR3     | 31.381  | 1.311  | 0.251 | 5.228  | 1.72E-07 | 3.73E-06 | no |
| ENSG00000173917 | HOXB2      | 24.613  | 1.791  | 0.343 | 5.226  | 1.73E-07 | 3.75E-06 | no |
| ENSG00000118971 | CCND2      | 20.415  | 2.459  | 0.472 | 5.210  | 1.89E-07 | 4.08E-06 | no |
| ENSG00000166401 | SERPINB8   | 28.698  | 1.326  | 0.254 | 5.210  | 1.89E-07 | 4.08E-06 | no |
| ENSG00000171492 | LRRRC8D    | 53.883  | 1.029  | 0.198 | 5.204  | 1.95E-07 | 4.19E-06 | no |
| ENSG00000095383 | TBC1D2     | 29.632  | 1.379  | 0.265 | 5.199  | 2.00E-07 | 4.29E-06 | no |
| ENSG00000024422 | EHD2       | 67.231  | 0.918  | 0.177 | 5.197  | 2.02E-07 | 4.34E-06 | no |
| ENSG00000143977 | SNRPG      | 161.784 | -0.964 | 0.186 | -5.190 | 2.10E-07 | 4.49E-06 | no |
| ENSG00000169855 | ROBO1      | 29.656  | -1.369 | 0.264 | -5.188 | 2.13E-07 | 4.53E-06 | no |
| ENSG00000149428 | HYOU1      | 175.752 | 0.745  | 0.144 | 5.172  | 2.31E-07 | 4.91E-06 | no |
| ENSG00000071242 | RPS6KA2    | 14.517  | 2.159  | 0.418 | 5.168  | 2.36E-07 | 5.01E-06 | no |
| ENSG00000247596 | TWF2       | 59.612  | 1.000  | 0.194 | 5.167  | 2.38E-07 | 5.03E-06 | no |
| ENSG00000170677 | SOCS6      | 106.887 | 0.799  | 0.155 | 5.165  | 2.40E-07 | 5.07E-06 | no |
| ENSG00000103995 | CEP152     | 117.710 | -0.885 | 0.171 | -5.163 | 2.43E-07 | 5.11E-06 | no |
| ENSG00000138061 | CYP1B1     | 73.894  | -1.263 | 0.245 | -5.154 | 2.54E-07 | 5.34E-06 | no |
| ENSG00000153551 | CMTM7      | 72.234  | 0.985  | 0.191 | 5.146  | 2.66E-07 | 5.55E-06 | no |
| ENSG00000138134 | STAMBPL1   | 15.510  | 2.154  | 0.419 | 5.143  | 2.70E-07 | 5.63E-06 | no |
| ENSG00000197302 | ZNF720     | 50.985  | 0.956  | 0.186 | 5.139  | 2.76E-07 | 5.72E-06 | no |
| ENSG00000177383 | MAGEF1     | 68.928  | -0.816 | 0.159 | -5.135 | 2.82E-07 | 5.84E-06 | no |
| ENSG00000140836 | ZFH3       | 105.653 | 0.740  | 0.144 | 5.130  | 2.90E-07 | 5.99E-06 | no |
| ENSG00000163508 | EOMES      | 12.104  | -1.742 | 0.341 | -5.114 | 3.16E-07 | 6.48E-06 | no |
| ENSG00000171720 | HDAC3      | 92.401  | -0.726 | 0.142 | -5.102 | 3.36E-07 | 6.87E-06 | no |
| ENSG00000123219 | CENPK      | 72.958  | -0.946 | 0.186 | -5.088 | 3.62E-07 | 7.35E-06 | no |
| ENSG00000114446 | IFT57      | 77.753  | -0.880 | 0.173 | -5.085 | 3.67E-07 | 7.40E-06 | no |
| ENSG00000117691 | NENF       | 114.833 | -0.700 | 0.138 | -5.085 | 3.67E-07 | 7.40E-06 | no |
| ENSG00000075336 | TIMM21     | 41.787  | -1.193 | 0.234 | -5.086 | 3.66E-07 | 7.40E-06 | no |
| ENSG00000011105 | TSPAN9     | 23.668  | 1.340  | 0.264 | 5.082  | 3.74E-07 | 7.51E-06 | no |
| ENSG00000121152 | NCAPH      | 73.047  | -0.995 | 0.196 | -5.080 | 3.78E-07 | 7.59E-06 | no |
| ENSG00000196535 | MYO18A     | 102.975 | 0.861  | 0.170 | 5.078  | 3.81E-07 | 7.62E-06 | no |
| ENSG00000173848 | NET1       | 106.924 | 0.709  | 0.140 | 5.065  | 4.09E-07 | 8.14E-06 | no |
| ENSG00000177666 | PNPLA2     | 73.208  | 0.967  | 0.191 | 5.065  | 4.08E-07 | 8.14E-06 | no |
| ENSG00000152818 | UTRN       | 102.333 | 1.043  | 0.206 | 5.056  | 4.27E-07 | 8.48E-06 | no |
| ENSG00000132646 | PCNA       | 138.303 | -0.858 | 0.170 | -5.036 | 4.76E-07 | 9.40E-06 | no |
| ENSG00000240230 | COX19      | 91.643  | 0.812  | 0.161 | 5.033  | 4.84E-07 | 9.52E-06 | no |
| ENSG00000261373 | VPS9D1-AS1 | 21.339  | 1.460  | 0.290 | 5.033  | 4.84E-07 | 9.52E-06 | no |
| ENSG00000234745 | HLA-B      | 440.335 | 0.722  | 0.144 | 5.021  | 5.15E-07 | 1.01E-05 | no |
| ENSG00000112759 | SLC29A1    | 105.683 | -0.934 | 0.186 | -5.012 | 5.39E-07 | 1.05E-05 | no |
| ENSG00000008256 | CYTH3      | 61.041  | 0.975  | 0.195 | 5.010  | 5.44E-07 | 1.06E-05 | no |
| ENSG00000123096 | SSPN       | 20.332  | 1.545  | 0.309 | 5.002  | 5.68E-07 | 1.10E-05 | no |
| ENSG00000163435 | ELF3       | 47.249  | -1.611 | 0.322 | -4.997 | 5.83E-07 | 1.13E-05 | no |
| ENSG00000100139 | MICALL1    | 38.565  | 0.977  | 0.196 | 4.997  | 5.84E-07 | 1.13E-05 | no |
| ENSG00000178078 | STAP2      | 16.243  | 2.121  | 0.425 | 4.992  | 5.97E-07 | 1.15E-05 | no |

|                 |             |          |        |       |        |          |          |    |
|-----------------|-------------|----------|--------|-------|--------|----------|----------|----|
| ENSG00000181744 | DIPK2A      | 11.601   | -3.001 | 0.602 | -4.987 | 6.12E-07 | 1.18E-05 | no |
| ENSG00000143674 | MAP3K21     | 17.559   | -2.356 | 0.473 | -4.982 | 6.30E-07 | 1.21E-05 | no |
| ENSG00000212464 | SNORA12     | 37.301   | 1.687  | 0.339 | 4.979  | 6.38E-07 | 1.22E-05 | no |
| ENSG00000136146 | MED4        | 93.362   | -0.707 | 0.142 | -4.972 | 6.61E-07 | 1.26E-05 | no |
| ENSG00000170802 | FOXN2       | 47.028   | 0.948  | 0.191 | 4.972  | 6.64E-07 | 1.27E-05 | no |
| ENSG00000209082 | MT-TL1      | 2408.153 | 1.198  | 0.241 | 4.970  | 6.71E-07 | 1.28E-05 | no |
| ENSG00000057019 | DCBLD2      | 364.749  | -0.807 | 0.163 | -4.963 | 6.96E-07 | 1.32E-05 | no |
| ENSG00000257218 | GATC        | 66.964   | 0.814  | 0.164 | 4.962  | 6.99E-07 | 1.33E-05 | no |
| ENSG00000128567 | PODXL       | 164.094  | 1.386  | 0.280 | 4.943  | 7.69E-07 | 1.46E-05 | no |
| ENSG00000169306 | IL1RAPL1    | 16.472   | -2.024 | 0.410 | -4.936 | 7.97E-07 | 1.50E-05 | no |
| ENSG00000132669 | RIN2        | 53.783   | 1.054  | 0.213 | 4.937  | 7.93E-07 | 1.50E-05 | no |
| ENSG00000162426 | SLC45A1     | 15.532   | 1.647  | 0.334 | 4.935  | 7.99E-07 | 1.50E-05 | no |
| ENSG00000154874 | CCDC144B    | 13.993   | 1.727  | 0.350 | 4.934  | 8.04E-07 | 1.51E-05 | no |
| ENSG00000239039 | SNORD13     | 83.464   | 0.970  | 0.197 | 4.922  | 8.57E-07 | 1.60E-05 | no |
| ENSG00000146918 | NCAPG2      | 122.114  | -0.724 | 0.147 | -4.921 | 8.62E-07 | 1.61E-05 | no |
| ENSG00000111981 | ULBP1       | 33.227   | 1.263  | 0.257 | 4.920  | 8.66E-07 | 1.62E-05 | no |
| ENSG00000107560 | RAB11FIP2   | 72.318   | 0.771  | 0.157 | 4.900  | 9.58E-07 | 1.78E-05 | no |
| ENSG00000110497 | AMBRA1      | 19.489   | 1.435  | 0.293 | 4.899  | 9.64E-07 | 1.79E-05 | no |
| ENSG00000152219 | ARL14EP     | 85.528   | 0.866  | 0.177 | 4.894  | 9.86E-07 | 1.82E-05 | no |
| ENSG00000260549 | MT1L        | 70.222   | 1.673  | 0.342 | 4.894  | 9.89E-07 | 1.82E-05 | no |
| ENSG00000156253 | RWDD2B      | 57.061   | 0.930  | 0.190 | 4.894  | 9.88E-07 | 1.82E-05 | no |
| ENSG00000196182 | STK40       | 54.856   | 0.839  | 0.172 | 4.893  | 9.93E-07 | 1.82E-05 | no |
| ENSG00000185112 | FAM43A      | 57.068   | 1.143  | 0.234 | 4.889  | 1.02E-06 | 1.86E-05 | no |
| ENSG00000139083 | ETV6        | 32.068   | 1.289  | 0.264 | 4.882  | 1.05E-06 | 1.92E-05 | no |
| ENSG00000080031 | PTPRH       | 30.917   | 1.287  | 0.264 | 4.882  | 1.05E-06 | 1.92E-05 | no |
| ENSG00000120334 | CENPL       | 34.968   | -1.367 | 0.280 | -4.876 | 1.08E-06 | 1.97E-05 | no |
| ENSG00000006016 | CRLF1       | 36.219   | -1.380 | 0.283 | -4.875 | 1.09E-06 | 1.98E-05 | no |
| ENSG00000155313 | USP25       | 46.781   | 1.040  | 0.213 | 4.873  | 1.10E-06 | 1.99E-05 | no |
| ENSG00000258655 | ARHGAP5-AS1 | 11.456   | 1.822  | 0.375 | 4.864  | 1.15E-06 | 2.08E-05 | no |
| ENSG00000081923 | ATP8B1      | 15.469   | 5.949  | 1.224 | 4.862  | 1.16E-06 | 2.09E-05 | no |
| ENSG00000050820 | BCAR1       | 82.464   | 0.892  | 0.184 | 4.862  | 1.16E-06 | 2.09E-05 | no |
| ENSG00000120093 | HOXB3       | 58.243   | 1.222  | 0.252 | 4.854  | 1.21E-06 | 2.18E-05 | no |
| ENSG00000184205 | TSPYL2      | 68.858   | -1.040 | 0.214 | -4.853 | 1.21E-06 | 2.18E-05 | no |
| ENSG00000156052 | GNAQ        | 37.853   | -1.800 | 0.372 | -4.845 | 1.26E-06 | 2.26E-05 | no |
| ENSG00000107863 | ARHGAP21    | 99.372   | 0.787  | 0.163 | 4.832  | 1.35E-06 | 2.41E-05 | no |
| ENSG00000149809 | TM7SF2      | 37.120   | 1.080  | 0.224 | 4.832  | 1.35E-06 | 2.41E-05 | no |
| ENSG00000108511 | HOXB6       | 39.271   | 1.371  | 0.284 | 4.830  | 1.36E-06 | 2.42E-05 | no |
| ENSG00000136826 | KLF4        | 26.997   | 1.445  | 0.299 | 4.830  | 1.36E-06 | 2.42E-05 | no |
| ENSG00000136928 | GABBR2      | 11.517   | -2.237 | 0.463 | -4.828 | 1.38E-06 | 2.45E-05 | no |
| ENSG00000157483 | MYO1E       | 69.543   | 0.774  | 0.160 | 4.825  | 1.40E-06 | 2.48E-05 | no |
| ENSG00000122378 | PRXL2A      | 62.364   | 0.914  | 0.190 | 4.818  | 1.45E-06 | 2.56E-05 | no |
| ENSG00000189337 | KAZN        | 54.575   | -0.982 | 0.204 | -4.817 | 1.46E-06 | 2.57E-05 | no |
| ENSG00000132635 | PCED1A      | 57.692   | 1.174  | 0.244 | 4.816  | 1.46E-06 | 2.58E-05 | no |

|                 |             |         |        |       |        |          |          |    |
|-----------------|-------------|---------|--------|-------|--------|----------|----------|----|
| ENSG00000215039 | CD27-AS1    | 19.273  | 1.328  | 0.276 | 4.813  | 1.48E-06 | 2.61E-05 | no |
| ENSG00000117697 | NSL1        | 48.411  | -1.039 | 0.216 | -4.807 | 1.53E-06 | 2.69E-05 | no |
| ENSG00000147224 | PRPS1       | 65.006  | -0.949 | 0.197 | -4.806 | 1.54E-06 | 2.69E-05 | no |
| ENSG00000139725 | RHOF        | 47.684  | 1.036  | 0.216 | 4.801  | 1.58E-06 | 2.76E-05 | no |
| ENSG00000188641 | DPYD        | 99.498  | -0.885 | 0.184 | -4.799 | 1.60E-06 | 2.79E-05 | no |
| ENSG00000161671 | EMC10       | 47.481  | 1.456  | 0.303 | 4.797  | 1.61E-06 | 2.81E-05 | no |
| ENSG00000089248 | ERP29       | 153.333 | 0.706  | 0.147 | 4.794  | 1.63E-06 | 2.85E-05 | no |
| ENSG00000224945 | n/a         | 19.292  | 1.182  | 0.246 | 4.793  | 1.64E-06 | 2.85E-05 | no |
| ENSG00000189057 | FAM111B     | 85.587  | -0.927 | 0.193 | -4.792 | 1.65E-06 | 2.86E-05 | no |
| ENSG00000110987 | BCL7A       | 43.488  | 1.067  | 0.223 | 4.791  | 1.66E-06 | 2.87E-05 | no |
| ENSG00000149311 | ATM         | 103.505 | 0.732  | 0.154 | 4.765  | 1.89E-06 | 3.25E-05 | no |
| ENSG00000075461 | CACNG4      | 16.713  | -1.787 | 0.375 | -4.765 | 1.89E-06 | 3.25E-05 | no |
| ENSG00000162599 | NFIA        | 52.397  | 1.158  | 0.243 | 4.761  | 1.92E-06 | 3.31E-05 | no |
| ENSG00000133302 | SLF1        | 69.174  | -0.876 | 0.184 | -4.760 | 1.94E-06 | 3.32E-05 | no |
| ENSG00000139926 | FRMD6       | 38.137  | 1.634  | 0.344 | 4.751  | 2.02E-06 | 3.46E-05 | no |
| ENSG00000214063 | TSPAN4      | 116.659 | 0.757  | 0.159 | 4.751  | 2.02E-06 | 3.46E-05 | no |
| ENSG00000241685 | ARPC1A      | 87.544  | 0.770  | 0.162 | 4.750  | 2.04E-06 | 3.48E-05 | no |
| ENSG00000100387 | RBX1        | 95.188  | -0.780 | 0.165 | -4.737 | 2.17E-06 | 3.70E-05 | no |
| ENSG00000271122 | HERPUD2-AS1 | 24.441  | 1.190  | 0.252 | 4.730  | 2.25E-06 | 3.81E-05 | no |
| ENSG00000156603 | MED19       | 74.429  | 0.822  | 0.174 | 4.726  | 2.29E-06 | 3.88E-05 | no |
| ENSG00000198130 | HIBCH       | 45.042  | -0.905 | 0.192 | -4.721 | 2.35E-06 | 3.97E-05 | no |
| ENSG00000174243 | DDX23       | 75.555  | -0.845 | 0.179 | -4.715 | 2.42E-06 | 4.08E-05 | no |
| ENSG00000182606 | TRAK1       | 39.804  | 1.001  | 0.213 | 4.702  | 2.58E-06 | 4.31E-05 | no |
| ENSG00000047188 | YTHDC2      | 63.934  | -0.845 | 0.180 | -4.698 | 2.62E-06 | 4.38E-05 | no |
| ENSG00000059378 | PARP12      | 18.643  | 1.636  | 0.349 | 4.684  | 2.82E-06 | 4.68E-05 | no |
| ENSG00000172725 | CORO1B      | 80.094  | 0.833  | 0.178 | 4.683  | 2.83E-06 | 4.70E-05 | no |
| ENSG00000204217 | BMPR2       | 78.087  | 0.849  | 0.181 | 4.678  | 2.90E-06 | 4.79E-05 | no |
| ENSG00000023330 | ALAS1       | 46.836  | 1.177  | 0.252 | 4.673  | 2.97E-06 | 4.91E-05 | no |
| ENSG00000068323 | TFE3        | 59.390  | 0.811  | 0.174 | 4.667  | 3.06E-06 | 5.04E-05 | no |
| ENSG00000120451 | SNX19       | 40.270  | 1.160  | 0.249 | 4.665  | 3.08E-06 | 5.06E-05 | no |
| ENSG00000166920 | C15orf48    | 52.598  | 2.997  | 0.645 | 4.648  | 3.36E-06 | 5.49E-05 | no |
| ENSG00000110435 | PDHX        | 60.792  | 0.820  | 0.176 | 4.645  | 3.41E-06 | 5.57E-05 | no |
| ENSG00000144468 | RHBDD1      | 17.411  | 1.674  | 0.361 | 4.644  | 3.42E-06 | 5.58E-05 | no |
| ENSG00000143740 | SNAP47      | 34.646  | -1.021 | 0.220 | -4.636 | 3.55E-06 | 5.78E-05 | no |
| ENSG00000003147 | ICA1        | 15.388  | 1.841  | 0.398 | 4.627  | 3.71E-06 | 6.02E-05 | no |
| ENSG00000196611 | MMP1        | 15.449  | -2.200 | 0.476 | -4.618 | 3.87E-06 | 6.26E-05 | no |
| ENSG00000277791 | PSMB3       | 112.080 | -0.892 | 0.193 | -4.613 | 3.97E-06 | 6.40E-05 | no |
| ENSG00000154265 | ABCA5       | 15.330  | 1.683  | 0.365 | 4.613  | 3.98E-06 | 6.41E-05 | no |
| ENSG00000142408 | CACNG8      | 127.801 | 0.701  | 0.152 | 4.612  | 3.99E-06 | 6.41E-05 | no |
| ENSG00000151503 | NCAPD3      | 69.996  | -0.818 | 0.177 | -4.610 | 4.02E-06 | 6.46E-05 | no |
| ENSG00000189171 | S100A13     | 150.115 | -0.819 | 0.178 | -4.605 | 4.12E-06 | 6.60E-05 | no |
| ENSG00000129003 | VPS13C      | 83.259  | 0.748  | 0.163 | 4.595  | 4.32E-06 | 6.89E-05 | no |
| ENSG00000168496 | FEN1        | 78.285  | -0.822 | 0.179 | -4.594 | 4.36E-06 | 6.93E-05 | no |

|                 |          |         |        |       |        |          |          |    |
|-----------------|----------|---------|--------|-------|--------|----------|----------|----|
| ENSG00000228594 | FNDC10   | 13.487  | 1.616  | 0.352 | 4.593  | 4.37E-06 | 6.94E-05 | no |
| ENSG00000143158 | MPC2     | 60.863  | -0.816 | 0.178 | -4.590 | 4.42E-06 | 7.01E-05 | no |
| ENSG00000196204 | RNF216P1 | 60.274  | 0.847  | 0.185 | 4.584  | 4.55E-06 | 7.19E-05 | no |
| ENSG00000032742 | IFT88    | 36.233  | -1.116 | 0.244 | -4.581 | 4.64E-06 | 7.30E-05 | no |
| ENSG00000174804 | FZD4     | 11.404  | 1.746  | 0.381 | 4.579  | 4.67E-06 | 7.34E-05 | no |
| ENSG00000136868 | SLC31A1  | 55.371  | 0.837  | 0.183 | 4.568  | 4.92E-06 | 7.69E-05 | no |
| ENSG00000162413 | KLHL21   | 40.345  | 0.957  | 0.210 | 4.561  | 5.08E-06 | 7.93E-05 | no |
| ENSG00000197321 | SVIL     | 60.727  | 0.935  | 0.205 | 4.562  | 5.08E-06 | 7.93E-05 | no |
| ENSG00000163001 | CFAP36   | 79.228  | -0.743 | 0.163 | -4.551 | 5.33E-06 | 8.28E-05 | no |
| ENSG00000163918 | RFC4     | 43.933  | -0.876 | 0.194 | -4.528 | 5.96E-06 | 9.20E-05 | no |
| ENSG00000196976 | LAGE3    | 103.660 | -0.785 | 0.174 | -4.521 | 6.16E-06 | 9.49E-05 | no |
| ENSG00000127564 | PKMYT1   | 49.425  | -0.936 | 0.207 | -4.517 | 6.27E-06 | 9.62E-05 | no |
| ENSG00000136450 | SRSF1    | 160.008 | -1.111 | 0.246 | -4.511 | 6.44E-06 | 9.87E-05 | no |
| ENSG00000122952 | ZWINT    | 55.869  | -0.863 | 0.191 | -4.510 | 6.48E-06 | 9.92E-05 | no |
| ENSG00000116584 | ARHGEF2  | 146.548 | 0.757  | 0.168 | 4.509  | 6.53E-06 | 9.98E-05 | no |
| ENSG00000173207 | CKS1B    | 202.286 | -0.921 | 0.204 | -4.507 | 6.58E-06 | 1.00E-04 | no |
| ENSG00000113645 | WWC1     | 88.862  | -0.914 | 0.203 | -4.504 | 6.68E-06 | 1.02E-04 | no |
| ENSG00000080200 | CRYBG3   | 67.339  | 0.830  | 0.185 | 4.493  | 7.02E-06 | 1.06E-04 | no |
| ENSG00000240065 | PSMB9    | 38.727  | 1.107  | 0.247 | 4.486  | 7.26E-06 | 1.09E-04 | no |
| ENSG00000170955 | CAVIN3   | 26.996  | 1.105  | 0.247 | 4.484  | 7.34E-06 | 1.10E-04 | no |
| ENSG00000177830 | CHID1    | 78.731  | 0.794  | 0.177 | 4.481  | 7.43E-06 | 1.11E-04 | no |
| ENSG00000172888 | ZNF621   | 57.705  | 0.823  | 0.184 | 4.480  | 7.48E-06 | 1.12E-04 | no |
| ENSG00000178531 | CTXN1    | 45.577  | -1.041 | 0.233 | -4.472 | 7.76E-06 | 1.16E-04 | no |
| ENSG00000254635 | WAC-AS1  | 45.215  | 0.953  | 0.214 | 4.465  | 8.02E-06 | 1.19E-04 | no |
| ENSG00000242802 | AP5Z1    | 54.582  | 0.781  | 0.175 | 4.461  | 8.15E-06 | 1.21E-04 | no |
| ENSG00000198925 | ATG9A    | 41.627  | 0.982  | 0.220 | 4.458  | 8.26E-06 | 1.22E-04 | no |
| ENSG00000184986 | TMEM121  | 15.077  | -1.534 | 0.344 | -4.458 | 8.29E-06 | 1.22E-04 | no |
| ENSG00000197712 | FAM114A1 | 65.564  | 0.849  | 0.190 | 4.457  | 8.31E-06 | 1.23E-04 | no |
| ENSG00000031691 | CENPQ    | 52.669  | -0.964 | 0.217 | -4.453 | 8.47E-06 | 1.25E-04 | no |
| ENSG00000147155 | EBP      | 81.425  | -0.712 | 0.160 | -4.453 | 8.48E-06 | 1.25E-04 | no |
| ENSG00000168404 | MLKL     | 18.684  | 1.446  | 0.325 | 4.452  | 8.50E-06 | 1.25E-04 | no |
| ENSG00000137965 | IFI44    | 10.619  | 2.647  | 0.596 | 4.445  | 8.77E-06 | 1.29E-04 | no |
| ENSG00000117593 | DARS2    | 40.178  | -0.919 | 0.207 | -4.442 | 8.93E-06 | 1.31E-04 | no |
| ENSG00000108679 | LGALS3BP | 88.548  | 0.845  | 0.190 | 4.440  | 8.99E-06 | 1.31E-04 | no |
| ENSG00000130921 | MTRFR    | 82.912  | 0.746  | 0.168 | 4.438  | 9.09E-06 | 1.33E-04 | no |
| ENSG00000088367 | EPB41L1  | 37.217  | -0.934 | 0.211 | -4.422 | 9.79E-06 | 1.42E-04 | no |
| ENSG00000148841 | ITPRIP   | 29.259  | 1.167  | 0.264 | 4.415  | 1.01E-05 | 1.46E-04 | no |
| ENSG00000108852 | MPP2     | 16.627  | -1.522 | 0.345 | -4.413 | 1.02E-05 | 1.47E-04 | no |
| ENSG00000065457 | ADAT1    | 42.675  | 0.902  | 0.204 | 4.411  | 1.03E-05 | 1.48E-04 | no |
| ENSG00000272068 | BCAN-AS1 | 34.787  | 0.908  | 0.206 | 4.407  | 1.05E-05 | 1.50E-04 | no |
| ENSG00000171960 | PPIH     | 51.390  | -0.998 | 0.227 | -4.406 | 1.05E-05 | 1.51E-04 | no |
| ENSG00000084112 | SSH1     | 94.412  | 0.772  | 0.175 | 4.403  | 1.07E-05 | 1.53E-04 | no |
| ENSG00000115902 | SLC1A4   | 23.250  | 1.198  | 0.272 | 4.401  | 1.08E-05 | 1.54E-04 | no |

|                 |           |         |        |       |        |          |          |    |
|-----------------|-----------|---------|--------|-------|--------|----------|----------|----|
| ENSG00000157514 | TSC22D3   | 21.418  | 1.943  | 0.443 | 4.388  | 1.14E-05 | 1.63E-04 | no |
| ENSG00000078902 | TOLLIP    | 54.444  | 0.940  | 0.214 | 4.386  | 1.15E-05 | 1.64E-04 | no |
| ENSG00000111321 | LTBR      | 108.172 | 0.802  | 0.183 | 4.386  | 1.16E-05 | 1.64E-04 | no |
| ENSG00000157193 | LRP8      | 45.034  | -0.846 | 0.193 | -4.381 | 1.18E-05 | 1.68E-04 | no |
| ENSG00000164237 | CMBL      | 36.320  | 0.980  | 0.224 | 4.379  | 1.19E-05 | 1.68E-04 | no |
| ENSG00000016391 | CHDH      | 11.111  | 2.084  | 0.476 | 4.378  | 1.20E-05 | 1.69E-04 | no |
| ENSG00000233085 | n/a       | 97.920  | 0.747  | 0.171 | 4.377  | 1.20E-05 | 1.70E-04 | no |
| ENSG00000111700 | SLCO1B3   | 19.187  | 1.348  | 0.308 | 4.374  | 1.22E-05 | 1.72E-04 | no |
| ENSG00000059758 | CDK17     | 30.264  | 1.144  | 0.262 | 4.364  | 1.27E-05 | 1.79E-04 | no |
| ENSG00000169567 | HINT1     | 719.669 | -0.725 | 0.166 | -4.358 | 1.31E-05 | 1.84E-04 | no |
| ENSG00000103196 | CRISPLD2  | 26.530  | 1.286  | 0.295 | 4.354  | 1.34E-05 | 1.87E-04 | no |
| ENSG00000213186 | TRIM59    | 22.146  | 5.393  | 1.240 | 4.350  | 1.36E-05 | 1.90E-04 | no |
| ENSG00000143641 | GALNT2    | 61.213  | -0.938 | 0.216 | -4.348 | 1.37E-05 | 1.91E-04 | no |
| ENSG00000117226 | GBP3      | 16.684  | 1.815  | 0.418 | 4.346  | 1.39E-05 | 1.92E-04 | no |
| ENSG00000168505 | GBX2      | 11.990  | -1.437 | 0.331 | -4.341 | 1.42E-05 | 1.96E-04 | no |
| ENSG00000135763 | URB2      | 26.254  | -1.329 | 0.306 | -4.338 | 1.44E-05 | 1.99E-04 | no |
| ENSG00000145362 | ANK2      | 17.689  | 1.396  | 0.322 | 4.334  | 1.46E-05 | 2.01E-04 | no |
| ENSG00000099337 | KCNK6     | 20.615  | 1.391  | 0.321 | 4.334  | 1.46E-05 | 2.01E-04 | no |
| ENSG00000125257 | ABCC4     | 59.158  | -0.818 | 0.189 | -4.331 | 1.48E-05 | 2.04E-04 | no |
| ENSG00000157693 | TMEM268   | 18.662  | 1.169  | 0.271 | 4.315  | 1.60E-05 | 2.18E-04 | no |
| ENSG00000145050 | MANF      | 81.737  | -0.891 | 0.207 | -4.314 | 1.60E-05 | 2.19E-04 | no |
| ENSG00000164919 | COX6C     | 313.832 | -0.791 | 0.184 | -4.308 | 1.64E-05 | 2.24E-04 | no |
| ENSG00000006756 | ARSD      | 54.449  | 0.795  | 0.185 | 4.305  | 1.67E-05 | 2.27E-04 | no |
| ENSG00000105011 | ASF1B     | 61.695  | -0.907 | 0.211 | -4.302 | 1.70E-05 | 2.30E-04 | no |
| ENSG00000140525 | FANCI     | 60.134  | -0.804 | 0.187 | -4.299 | 1.71E-05 | 2.32E-04 | no |
| ENSG00000149636 | DSN1      | 60.382  | -0.854 | 0.199 | -4.294 | 1.76E-05 | 2.37E-04 | no |
| ENSG00000169926 | KLF13     | 39.327  | 1.010  | 0.235 | 4.290  | 1.79E-05 | 2.41E-04 | no |
| ENSG00000257178 | n/a       | 19.223  | 1.851  | 0.432 | 4.285  | 1.83E-05 | 2.45E-04 | no |
| ENSG00000005801 | ZNF195    | 62.943  | 0.850  | 0.198 | 4.283  | 1.85E-05 | 2.47E-04 | no |
| ENSG00000143179 | UCK2      | 71.240  | -0.731 | 0.171 | -4.279 | 1.88E-05 | 2.52E-04 | no |
| ENSG00000158402 | CDC25C    | 44.425  | -0.880 | 0.206 | -4.276 | 1.91E-05 | 2.55E-04 | no |
| ENSG00000035499 | DEPDC1B   | 52.979  | -0.979 | 0.230 | -4.264 | 2.01E-05 | 2.68E-04 | no |
| ENSG00000197256 | KANK2     | 58.681  | -1.077 | 0.253 | -4.264 | 2.01E-05 | 2.68E-04 | no |
| ENSG00000233493 | TMEM238   | 33.968  | 1.030  | 0.242 | 4.261  | 2.04E-05 | 2.72E-04 | no |
| ENSG00000104783 | KCNN4     | 71.412  | 0.758  | 0.178 | 4.258  | 2.07E-05 | 2.75E-04 | no |
| ENSG00000147862 | NFIB      | 115.635 | 0.775  | 0.182 | 4.254  | 2.10E-05 | 2.78E-04 | no |
| ENSG00000228742 | LINC02577 | 32.876  | -1.000 | 0.235 | -4.249 | 2.14E-05 | 2.84E-04 | no |
| ENSG00000148926 | ADM       | 95.383  | 1.628  | 0.385 | 4.231  | 2.33E-05 | 3.06E-04 | no |
| ENSG00000204116 | CHIC1     | 11.528  | 3.104  | 0.734 | 4.229  | 2.35E-05 | 3.09E-04 | no |
| ENSG00000176593 | n/a       | 19.464  | 1.362  | 0.322 | 4.224  | 2.40E-05 | 3.15E-04 | no |
| ENSG00000198830 | HMG2      | 72.261  | -0.838 | 0.199 | -4.217 | 2.48E-05 | 3.25E-04 | no |
| ENSG00000106415 | GLCCI1    | 14.737  | 2.235  | 0.531 | 4.209  | 2.57E-05 | 3.36E-04 | no |
| ENSG00000139684 | ESD       | 90.157  | -0.861 | 0.205 | -4.205 | 2.61E-05 | 3.41E-04 | no |



|                 |            |         |        |       |        |          |          |    |
|-----------------|------------|---------|--------|-------|--------|----------|----------|----|
| ENSG00000136048 | DRAM1      | 21.959  | 1.268  | 0.302 | 4.200  | 2.67E-05 | 3.49E-04 | no |
| ENSG00000063322 | MED29      | 248.385 | 0.716  | 0.170 | 4.199  | 2.68E-05 | 3.49E-04 | no |
| ENSG00000175115 | PACS1      | 54.694  | 0.989  | 0.236 | 4.198  | 2.70E-05 | 3.51E-04 | no |
| ENSG00000179833 | SERTAD2    | 51.100  | 1.002  | 0.239 | 4.188  | 2.81E-05 | 3.65E-04 | no |
| ENSG00000024526 | DEPDC1     | 91.189  | -0.743 | 0.178 | -4.183 | 2.88E-05 | 3.74E-04 | no |
| ENSG00000164172 | MOCS2      | 52.017  | -0.887 | 0.212 | -4.181 | 2.90E-05 | 3.76E-04 | no |
| ENSG00000215788 | TNFRSF25   | 23.766  | 1.130  | 0.270 | 4.178  | 2.95E-05 | 3.81E-04 | no |
| ENSG00000171864 | PRND       | 18.586  | -1.623 | 0.389 | -4.176 | 2.96E-05 | 3.83E-04 | no |
| ENSG00000176208 | ATAD5      | 85.727  | -0.724 | 0.174 | -4.171 | 3.03E-05 | 3.92E-04 | no |
| ENSG00000082515 | MRPL22     | 107.346 | -0.760 | 0.182 | -4.169 | 3.06E-05 | 3.95E-04 | no |
| ENSG00000023839 | ABCC2      | 32.539  | 0.816  | 0.196 | 4.167  | 3.08E-05 | 3.97E-04 | no |
| ENSG00000137500 | CCDC90B    | 64.404  | 0.721  | 0.173 | 4.166  | 3.09E-05 | 3.98E-04 | no |
| ENSG00000165480 | SKA3       | 38.990  | -0.948 | 0.227 | -4.166 | 3.10E-05 | 3.98E-04 | no |
| ENSG00000051341 | POLQ       | 45.385  | -0.850 | 0.204 | -4.165 | 3.12E-05 | 4.00E-04 | no |
| ENSG00000240972 | MIF        | 29.687  | -1.239 | 0.298 | -4.163 | 3.14E-05 | 4.03E-04 | no |
| ENSG00000113356 | POLR3G     | 59.971  | -0.711 | 0.171 | -4.158 | 3.22E-05 | 4.11E-04 | no |
| ENSG00000107960 | STN1       | 23.481  | 1.217  | 0.293 | 4.157  | 3.22E-05 | 4.11E-04 | no |
| ENSG00000153879 | CEBPG      | 101.760 | 0.758  | 0.182 | 4.156  | 3.24E-05 | 4.13E-04 | no |
| ENSG00000131174 | COX7B      | 205.479 | -0.710 | 0.171 | -4.151 | 3.31E-05 | 4.21E-04 | no |
| ENSG00000172977 | KAT5       | 47.193  | 1.137  | 0.274 | 4.147  | 3.37E-05 | 4.27E-04 | no |
| ENSG00000196754 | S100A2     | 44.182  | -0.873 | 0.210 | -4.146 | 3.38E-05 | 4.27E-04 | no |
| ENSG00000148985 | PGAP2      | 41.228  | 1.036  | 0.250 | 4.145  | 3.39E-05 | 4.29E-04 | no |
| ENSG00000180917 | CMTR2      | 55.187  | 0.795  | 0.192 | 4.142  | 3.44E-05 | 4.34E-04 | no |
| ENSG00000169733 | RFNG       | 72.858  | 0.737  | 0.178 | 4.140  | 3.48E-05 | 4.37E-04 | no |
| ENSG00000029153 | ARNTL2     | 29.363  | 1.829  | 0.443 | 4.134  | 3.57E-05 | 4.49E-04 | no |
| ENSG00000170385 | SLC30A1    | 33.014  | 1.033  | 0.250 | 4.128  | 3.65E-05 | 4.58E-04 | no |
| ENSG00000261824 | LINC00662  | 49.287  | 0.826  | 0.200 | 4.125  | 3.70E-05 | 4.64E-04 | no |
| ENSG00000165572 | KBTBD6     | 24.231  | -1.152 | 0.280 | -4.121 | 3.77E-05 | 4.71E-04 | no |
| ENSG00000123104 | ITPR2      | 93.077  | 0.702  | 0.170 | 4.120  | 3.79E-05 | 4.73E-04 | no |
| ENSG00000175606 | TMEM70     | 35.832  | -1.120 | 0.272 | -4.118 | 3.83E-05 | 4.77E-04 | no |
| ENSG00000167972 | ABCA3      | 13.046  | 1.655  | 0.402 | 4.117  | 3.83E-05 | 4.78E-04 | no |
| ENSG00000205885 | C1RL-AS1   | 26.323  | 1.216  | 0.296 | 4.104  | 4.05E-05 | 5.03E-04 | no |
| ENSG00000173598 | NUDT4      | 37.668  | 0.898  | 0.219 | 4.103  | 4.07E-05 | 5.05E-04 | no |
| ENSG00000134250 | NOTCH2     | 74.342  | -0.701 | 0.171 | -4.100 | 4.12E-05 | 5.11E-04 | no |
| ENSG00000120708 | TGFBI      | 70.573  | 0.822  | 0.200 | 4.100  | 4.13E-05 | 5.11E-04 | no |
| ENSG00000138735 | PDE5A      | 22.276  | -3.587 | 0.877 | -4.088 | 4.35E-05 | 5.36E-04 | no |
| ENSG00000130208 | APOC1      | 32.223  | 1.005  | 0.246 | 4.087  | 4.36E-05 | 5.37E-04 | no |
| ENSG00000015475 | BID        | 68.613  | -0.727 | 0.178 | -4.085 | 4.41E-05 | 5.43E-04 | no |
| ENSG00000119899 | SLC17A5    | 37.376  | 0.915  | 0.224 | 4.081  | 4.48E-05 | 5.50E-04 | no |
| ENSG00000154144 | TBRG1      | 76.453  | 0.751  | 0.184 | 4.081  | 4.49E-05 | 5.51E-04 | no |
| ENSG00000267270 | PARD6G-AS1 | 11.335  | -1.619 | 0.397 | -4.077 | 4.56E-05 | 5.56E-04 | no |
| ENSG00000179348 | GATA2      | 41.393  | -0.836 | 0.206 | -4.067 | 4.77E-05 | 5.79E-04 | no |
| ENSG00000102897 | LYRM1      | 24.556  | 1.049  | 0.258 | 4.063  | 4.85E-05 | 5.86E-04 | no |

|                 |          |         |        |       |        |          |          |    |
|-----------------|----------|---------|--------|-------|--------|----------|----------|----|
| ENSG00000123609 | NMI      | 72.742  | 0.767  | 0.189 | 4.058  | 4.95E-05 | 5.97E-04 | no |
| ENSG00000156535 | CD109    | 69.154  | 0.814  | 0.201 | 4.056  | 5.00E-05 | 6.01E-04 | no |
| ENSG00000076513 | ANKRD13A | 58.571  | 0.875  | 0.216 | 4.049  | 5.14E-05 | 6.17E-04 | no |
| ENSG00000126822 | PLEKHG3  | 31.102  | -1.304 | 0.322 | -4.048 | 5.17E-05 | 6.19E-04 | no |
| ENSG00000093009 | CDC45    | 27.842  | -1.068 | 0.264 | -4.043 | 5.27E-05 | 6.30E-04 | no |
| ENSG00000155324 | GRAMD2B  | 33.279  | -1.113 | 0.275 | -4.043 | 5.28E-05 | 6.30E-04 | no |
| ENSG00000139629 | GALNT6   | 23.384  | 1.282  | 0.317 | 4.040  | 5.35E-05 | 6.39E-04 | no |
| ENSG00000135116 | HRK      | 10.462  | 1.734  | 0.430 | 4.035  | 5.45E-05 | 6.48E-04 | no |
| ENSG00000140931 | CMTM3    | 46.713  | 0.790  | 0.196 | 4.034  | 5.49E-05 | 6.51E-04 | no |
| ENSG00000166333 | ILK      | 50.123  | 0.826  | 0.205 | 4.034  | 5.49E-05 | 6.51E-04 | no |
| ENSG00000210140 | MT-TC    | 21.884  | 1.175  | 0.291 | 4.033  | 5.50E-05 | 6.51E-04 | no |
| ENSG00000161800 | RACGAP1  | 38.301  | -1.153 | 0.286 | -4.034 | 5.49E-05 | 6.51E-04 | no |
| ENSG00000160783 | PMF1     | 19.746  | -1.490 | 0.371 | -4.016 | 5.91E-05 | 6.95E-04 | no |
| ENSG00000170779 | CDCA4    | 49.924  | -0.885 | 0.221 | -4.015 | 5.95E-05 | 6.99E-04 | no |
| ENSG00000165996 | HACD1    | 30.115  | 0.945  | 0.235 | 4.013  | 6.00E-05 | 7.03E-04 | no |
| ENSG00000145604 | SKP2     | 55.740  | -0.905 | 0.226 | -4.013 | 6.00E-05 | 7.03E-04 | no |
| ENSG00000067715 | SYT1     | 38.240  | 0.913  | 0.228 | 4.003  | 6.26E-05 | 7.31E-04 | no |
| ENSG00000198858 | R3HDM4   | 53.081  | 0.883  | 0.221 | 3.996  | 6.44E-05 | 7.50E-04 | no |
| ENSG00000129757 | CDKN1C   | 20.137  | 1.524  | 0.382 | 3.993  | 6.53E-05 | 7.57E-04 | no |
| ENSG00000188483 | IER5L    | 48.799  | -0.894 | 0.224 | -3.984 | 6.77E-05 | 7.84E-04 | no |
| ENSG00000166452 | AKIP1    | 52.503  | 0.789  | 0.198 | 3.982  | 6.83E-05 | 7.89E-04 | no |
| ENSG00000140199 | SLC12A6  | 28.582  | 1.254  | 0.315 | 3.980  | 6.88E-05 | 7.94E-04 | no |
| ENSG00000176046 | NUPR1    | 31.760  | 1.676  | 0.422 | 3.976  | 7.02E-05 | 8.09E-04 | no |
| ENSG00000149716 | LTO1     | 23.791  | 1.130  | 0.285 | 3.971  | 7.16E-05 | 8.24E-04 | no |
| ENSG00000133131 | MORC4    | 56.898  | -0.789 | 0.199 | -3.967 | 7.28E-05 | 8.36E-04 | no |
| ENSG00000160957 | RECQL4   | 36.389  | -0.986 | 0.249 | -3.961 | 7.47E-05 | 8.56E-04 | no |
| ENSG00000181264 | TLCD5    | 35.395  | 0.933  | 0.236 | 3.961  | 7.47E-05 | 8.56E-04 | no |
| ENSG00000128708 | HAT1     | 62.487  | -0.773 | 0.195 | -3.959 | 7.51E-05 | 8.60E-04 | no |
| ENSG00000104147 | OIP5     | 32.791  | -1.256 | 0.318 | -3.955 | 7.64E-05 | 8.73E-04 | no |
| ENSG00000165507 | DEPP1    | 13.012  | 1.554  | 0.394 | 3.946  | 7.95E-05 | 9.06E-04 | no |
| ENSG00000163516 | ANKZF1   | 53.836  | 0.866  | 0.219 | 3.945  | 7.99E-05 | 9.08E-04 | no |
| ENSG00000173559 | NABP1    | 48.877  | 1.021  | 0.259 | 3.945  | 7.99E-05 | 9.08E-04 | no |
| ENSG00000138495 | COX17    | 98.070  | -0.859 | 0.218 | -3.937 | 8.26E-05 | 9.33E-04 | no |
| ENSG00000100092 | SH3BP1   | 18.062  | -1.298 | 0.330 | -3.934 | 8.37E-05 | 9.44E-04 | no |
| ENSG00000110628 | SLC22A18 | 23.269  | 1.210  | 0.308 | 3.933  | 8.38E-05 | 9.45E-04 | no |
| ENSG00000165626 | BEND7    | 16.932  | 1.407  | 0.358 | 3.933  | 8.41E-05 | 9.46E-04 | no |
| ENSG00000174371 | EXO1     | 32.535  | -1.087 | 0.277 | -3.930 | 8.50E-05 | 9.57E-04 | no |
| ENSG00000233461 | n/a      | 11.602  | -1.957 | 0.499 | -3.923 | 8.73E-05 | 9.82E-04 | no |
| ENSG00000167555 | ZNF528   | 13.577  | 1.366  | 0.348 | 3.922  | 8.79E-05 | 9.88E-04 | no |
| ENSG00000165704 | HPRT1    | 65.129  | -0.855 | 0.219 | -3.909 | 9.29E-05 | 1.04E-03 | no |
| ENSG00000164171 | ITGA2    | 115.252 | -1.787 | 0.457 | -3.908 | 9.30E-05 | 1.04E-03 | no |
| ENSG00000094880 | CDC23    | 63.508  | -0.877 | 0.225 | -3.906 | 9.39E-05 | 1.05E-03 | no |
| ENSG00000181751 | MACIR    | 17.699  | -1.371 | 0.351 | -3.901 | 9.57E-05 | 1.06E-03 | no |

|                 |           |         |        |       |        |          |          |    |
|-----------------|-----------|---------|--------|-------|--------|----------|----------|----|
| ENSG00000165983 | PTER      | 32.626  | 0.863  | 0.222 | 3.895  | 9.84E-05 | 1.09E-03 | no |
| ENSG00000065833 | ME1       | 52.995  | -0.741 | 0.191 | -3.877 | 0.000106 | 0.001166 | no |
| ENSG00000135926 | TMBIM1    | 68.198  | 0.847  | 0.219 | 3.874  | 0.000107 | 0.001178 | no |
| ENSG00000210077 | MT-TV     | 114.303 | 0.849  | 0.219 | 3.872  | 0.000108 | 0.00119  | no |
| ENSG00000158828 | PINK1     | 57.879  | 0.759  | 0.196 | 3.870  | 0.000109 | 0.001195 | no |
| ENSG00000146574 | CCZ1B     | 25.156  | -1.347 | 0.349 | -3.863 | 0.000112 | 0.001225 | no |
| ENSG00000099377 | HSD3B7    | 43.996  | 0.913  | 0.236 | 3.863  | 0.000112 | 0.001225 | no |
| ENSG00000204264 | PSMB8     | 28.371  | 1.385  | 0.360 | 3.853  | 0.000117 | 0.00127  | no |
| ENSG00000204876 | n/a       | 14.368  | 1.125  | 0.292 | 3.852  | 0.000117 | 0.001275 | no |
| ENSG00000198113 | TOR4A     | 62.197  | 0.707  | 0.184 | 3.849  | 0.000119 | 0.001287 | no |
| ENSG00000163050 | COQ8A     | 25.678  | -1.013 | 0.263 | -3.846 | 0.00012  | 0.001304 | no |
| ENSG00000101213 | PTK6      | 11.450  | 1.558  | 0.405 | 3.844  | 0.000121 | 0.00131  | no |
| ENSG00000134049 | IER3IP1   | 56.328  | -0.788 | 0.205 | -3.842 | 0.000122 | 0.00132  | no |
| ENSG00000167323 | STIM1     | 52.593  | 0.766  | 0.200 | 3.837  | 0.000125 | 0.001347 | no |
| ENSG00000178773 | CPNE7     | 84.744  | 0.854  | 0.223 | 3.836  | 0.000125 | 0.001347 | no |
| ENSG00000107521 | HPS1      | 56.815  | 0.714  | 0.186 | 3.836  | 0.000125 | 0.001347 | no |
| ENSG00000204227 | RING1     | 75.044  | 0.726  | 0.189 | 3.836  | 0.000125 | 0.001347 | no |
| ENSG00000101447 | FAM83D    | 46.599  | -0.930 | 0.243 | -3.830 | 0.000128 | 0.001376 | no |
| ENSG00000135269 | TES       | 137.335 | 2.986  | 0.781 | 3.826  | 0.000131 | 0.001401 | no |
| ENSG00000235884 | LINC00941 | 12.446  | 1.464  | 0.385 | 3.800  | 0.000145 | 0.001542 | no |
| ENSG00000133393 | CEP20     | 77.399  | -0.779 | 0.205 | -3.796 | 0.000147 | 0.001562 | no |
| ENSG00000005448 | WDR54     | 52.734  | -0.754 | 0.199 | -3.793 | 0.000149 | 0.00158  | no |
| ENSG00000135801 | TAF5L     | 42.678  | -0.850 | 0.224 | -3.791 | 0.00015  | 0.001589 | no |
| ENSG00000186871 | ERCC6L    | 32.784  | -0.925 | 0.244 | -3.790 | 0.000151 | 0.001592 | no |
| ENSG00000185869 | ZNF829    | 10.645  | 2.447  | 0.646 | 3.790  | 0.000151 | 0.001595 | no |
| ENSG00000158966 | CACHD1    | 10.313  | 2.001  | 0.528 | 3.787  | 0.000152 | 0.001606 | no |
| ENSG00000184992 | BRI3BP    | 70.230  | -0.734 | 0.194 | -3.785 | 0.000154 | 0.001621 | no |
| ENSG00000075340 | ADD2      | 27.718  | 0.955  | 0.252 | 3.781  | 0.000156 | 0.001643 | no |
| ENSG00000173267 | SNCG      | 14.880  | -1.595 | 0.422 | -3.776 | 0.000159 | 0.001672 | no |
| ENSG00000136153 | LMO7      | 28.847  | 1.159  | 0.307 | 3.771  | 0.000163 | 0.001704 | no |
| ENSG00000106351 | AGFG2     | 10.320  | 1.819  | 0.483 | 3.764  | 0.000167 | 0.001741 | no |
| ENSG00000141753 | IGFBP4    | 42.784  | 0.968  | 0.257 | 3.762  | 0.000168 | 0.001751 | no |
| ENSG00000101003 | GINS1     | 39.917  | -1.014 | 0.269 | -3.761 | 0.000169 | 0.001758 | no |
| ENSG00000077458 | FAM76B    | 39.247  | 0.930  | 0.247 | 3.758  | 0.000171 | 0.001777 | no |
| ENSG00000215251 | FASTKD5   | 30.905  | -0.846 | 0.225 | -3.754 | 0.000174 | 0.001798 | no |
| ENSG00000229833 | PET100    | 30.226  | -1.027 | 0.274 | -3.751 | 0.000176 | 0.001819 | no |
| ENSG00000139624 | CERS5     | 21.884  | 1.009  | 0.269 | 3.748  | 0.000178 | 0.001834 | no |
| ENSG00000168569 | TMEM223   | 35.278  | 0.920  | 0.246 | 3.744  | 0.000181 | 0.001861 | no |
| ENSG00000249992 | TMEM158   | 79.393  | 0.757  | 0.202 | 3.741  | 0.000184 | 0.001883 | no |
| ENSG00000132182 | NUP210    | 50.023  | -0.763 | 0.204 | -3.736 | 0.000187 | 0.001919 | no |
| ENSG00000008838 | MED24     | 63.617  | 0.882  | 0.236 | 3.730  | 0.000191 | 0.001957 | no |
| ENSG00000183340 | JRKL      | 24.374  | 1.222  | 0.328 | 3.725  | 0.000196 | 0.001998 | no |
| ENSG00000067113 | PLPP1     | 23.931  | 0.996  | 0.267 | 3.724  | 0.000196 | 0.002001 | no |

|                 |          |        |        |       |        |          |          |    |
|-----------------|----------|--------|--------|-------|--------|----------|----------|----|
| ENSG00000148400 | NOTCH1   | 28.694 | -0.999 | 0.268 | -3.723 | 0.000197 | 0.002007 | no |
| ENSG00000142694 | EVA1B    | 13.884 | 1.350  | 0.363 | 3.721  | 0.000199 | 0.002022 | no |
| ENSG00000237649 | KIFC1    | 86.491 | -0.706 | 0.191 | -3.695 | 0.00022  | 0.002222 | no |
| ENSG00000149823 | VPS51    | 54.885 | 0.828  | 0.224 | 3.693  | 0.000222 | 0.002236 | no |
| ENSG00000164109 | MAD2L1   | 42.227 | -0.847 | 0.229 | -3.692 | 0.000222 | 0.002239 | no |
| ENSG00000059728 | MXD1     | 21.706 | 1.292  | 0.351 | 3.683  | 0.00023  | 0.002313 | no |
| ENSG00000129195 | PIMREG   | 34.894 | -0.957 | 0.260 | -3.680 | 0.000233 | 0.002336 | no |
| ENSG00000164597 | COG5     | 30.640 | 0.850  | 0.231 | 3.679  | 0.000234 | 0.002342 | no |
| ENSG00000188910 | GJB3     | 41.786 | 0.924  | 0.252 | 3.671  | 0.000242 | 0.002411 | no |
| ENSG00000085117 | CD82     | 11.889 | 1.488  | 0.406 | 3.667  | 0.000246 | 0.002447 | no |
| ENSG00000115738 | ID2      | 44.003 | -1.015 | 0.277 | -3.661 | 0.000251 | 0.002494 | no |
| ENSG00000103061 | SLC7A6OS | 46.312 | 0.718  | 0.196 | 3.661  | 0.000252 | 0.002499 | no |
| ENSG00000135540 | NHSL1    | 17.502 | 1.301  | 0.356 | 3.656  | 0.000256 | 0.002543 | no |
| ENSG00000101935 | AMMECR1  | 47.701 | 0.716  | 0.196 | 3.655  | 0.000257 | 0.002549 | no |
| ENSG00000065989 | PDE4A    | 17.122 | -1.831 | 0.501 | -3.653 | 0.000259 | 0.002566 | no |
| ENSG00000179222 | MAGED1   | 69.008 | -0.734 | 0.201 | -3.649 | 0.000264 | 0.0026   | no |
| ENSG00000139370 | SLC15A4  | 27.538 | 1.074  | 0.294 | 3.648  | 0.000264 | 0.002601 | no |
| ENSG00000196517 | SLC6A9   | 16.766 | 1.181  | 0.324 | 3.647  | 0.000265 | 0.002607 | no |
| ENSG00000135452 | TSPAN31  | 10.144 | 2.519  | 0.692 | 3.643  | 0.000269 | 0.002636 | no |
| ENSG00000057294 | PKP2     | 16.342 | 1.907  | 0.523 | 3.643  | 0.00027  | 0.002636 | no |
| ENSG00000212283 | SNORD89  | 21.218 | 1.329  | 0.366 | 3.634  | 0.000279 | 0.002717 | no |
| ENSG00000172269 | DPAGT1   | 42.679 | 0.794  | 0.219 | 3.626  | 0.000288 | 0.002803 | no |
| ENSG00000124782 | RREB1    | 46.584 | 0.791  | 0.219 | 3.615  | 0.0003   | 0.002909 | no |
| ENSG00000276043 | UHRF1    | 18.435 | -1.227 | 0.340 | -3.613 | 0.000303 | 0.002935 | no |
| ENSG00000158161 | EYA3     | 33.931 | -0.856 | 0.237 | -3.611 | 0.000305 | 0.002948 | no |
| ENSG00000272763 | n/a      | 20.300 | 1.799  | 0.499 | 3.604  | 0.000313 | 0.003009 | no |
| ENSG00000197299 | BLM      | 40.901 | -0.957 | 0.266 | -3.601 | 0.000317 | 0.00304  | no |
| ENSG00000135476 | ESPL1    | 23.280 | -1.156 | 0.321 | -3.601 | 0.000317 | 0.00304  | no |
| ENSG00000116199 | FAM20B   | 52.535 | -0.730 | 0.203 | -3.597 | 0.000322 | 0.003079 | no |
| ENSG00000242498 | ARPIN    | 12.085 | 1.375  | 0.382 | 3.596  | 0.000323 | 0.003087 | no |
| ENSG00000181929 | PRKAG1   | 65.694 | 0.720  | 0.201 | 3.592  | 0.000328 | 0.003116 | no |
| ENSG00000086200 | IPO11    | 36.663 | -0.838 | 0.234 | -3.587 | 0.000335 | 0.00317  | no |
| ENSG00000185347 | TEDC1    | 20.285 | -1.000 | 0.279 | -3.584 | 0.000338 | 0.003201 | no |
| ENSG00000136986 | DERL1    | 54.448 | -1.006 | 0.281 | -3.581 | 0.000342 | 0.00323  | no |
| ENSG00000162496 | DHRS3    | 36.596 | -1.113 | 0.311 | -3.580 | 0.000344 | 0.003248 | no |
| ENSG00000141574 | SECTM1   | 15.069 | 1.164  | 0.325 | 3.578  | 0.000346 | 0.003266 | no |
| ENSG00000012963 | UBR7     | 37.939 | -0.964 | 0.270 | -3.568 | 0.00036  | 0.003374 | no |
| ENSG00000183856 | IQGAP3   | 50.009 | -0.747 | 0.210 | -3.563 | 0.000367 | 0.003435 | no |
| ENSG00000146278 | PNRC1    | 86.118 | -0.786 | 0.221 | -3.560 | 0.00037  | 0.003463 | no |
| ENSG00000008277 | ADAM22   | 12.712 | 1.335  | 0.375 | 3.558  | 0.000373 | 0.003488 | no |
| ENSG00000125637 | PSD4     | 27.381 | 0.800  | 0.225 | 3.555  | 0.000379 | 0.003531 | no |
| ENSG00000197943 | PLCG2    | 13.113 | 1.391  | 0.392 | 3.551  | 0.000384 | 0.003568 | no |
| ENSG00000235106 | BRD3OS   | 26.006 | -0.937 | 0.264 | -3.551 | 0.000384 | 0.003573 | no |

|                 |          |        |        |       |        |          |          |    |
|-----------------|----------|--------|--------|-------|--------|----------|----------|----|
| ENSG00000117228 | GBP1     | 12.834 | 1.327  | 0.374 | 3.550  | 0.000385 | 0.003577 | no |
| ENSG00000185163 | DDX51    | 31.040 | 0.857  | 0.242 | 3.546  | 0.000391 | 0.003625 | no |
| ENSG00000157837 | SPPL3    | 52.235 | 0.703  | 0.198 | 3.543  | 0.000395 | 0.003661 | no |
| ENSG00000105329 | TGFB1    | 27.682 | 1.141  | 0.323 | 3.531  | 0.000414 | 0.003807 | no |
| ENSG00000089060 | SLC8B1   | 15.743 | 1.434  | 0.406 | 3.529  | 0.000416 | 0.003825 | no |
| ENSG00000059122 | FLYWCH1  | 26.377 | 0.922  | 0.261 | 3.528  | 0.000419 | 0.003847 | no |
| ENSG00000168994 | PXDC1    | 33.188 | 1.233  | 0.351 | 3.513  | 0.000442 | 0.004047 | no |
| ENSG00000156521 | TYSND1   | 32.277 | 0.764  | 0.218 | 3.512  | 0.000445 | 0.004066 | no |
| ENSG00000188010 | MORN2    | 12.764 | -1.412 | 0.402 | -3.511 | 0.000446 | 0.004074 | no |
| ENSG00000090975 | PITPNM2  | 13.076 | 1.466  | 0.418 | 3.511  | 0.000447 | 0.004074 | no |
| ENSG00000204516 | MICB     | 31.863 | 1.273  | 0.363 | 3.510  | 0.000448 | 0.004082 | no |
| ENSG00000026950 | BTN3A1   | 12.002 | 1.566  | 0.446 | 3.510  | 0.000449 | 0.004088 | no |
| ENSG00000213347 | MXD3     | 11.968 | -1.364 | 0.389 | -3.509 | 0.00045  | 0.004101 | no |
| ENSG00000135241 | PNPLA8   | 48.264 | 0.772  | 0.220 | 3.505  | 0.000456 | 0.004143 | no |
| ENSG00000164070 | HSPA4L   | 47.455 | 0.748  | 0.213 | 3.503  | 0.00046  | 0.004169 | no |
| ENSG00000111725 | PRKAB1   | 18.968 | 1.263  | 0.362 | 3.491  | 0.00048  | 0.004321 | no |
| ENSG00000247746 | USP51    | 18.171 | -1.085 | 0.311 | -3.490 | 0.000483 | 0.004344 | no |
| ENSG00000159110 | IFNAR2   | 24.908 | 0.906  | 0.260 | 3.485  | 0.000493 | 0.004421 | no |
| ENSG00000175130 | MARCKSL1 | 47.536 | -0.733 | 0.210 | -3.484 | 0.000494 | 0.004431 | no |
| ENSG00000173334 | TRIB1    | 18.732 | 1.308  | 0.376 | 3.480  | 0.000501 | 0.004484 | no |
| ENSG00000145781 | COMMD10  | 30.509 | -0.839 | 0.241 | -3.477 | 0.000507 | 0.004529 | no |
| ENSG00000118689 | FOXO3    | 60.428 | 0.752  | 0.216 | 3.476  | 0.000509 | 0.00454  | no |
| ENSG00000175482 | POLD4    | 19.380 | 1.415  | 0.407 | 3.475  | 0.000511 | 0.00455  | no |
| ENSG00000205544 | TMEM256  | 40.820 | -0.837 | 0.241 | -3.473 | 0.000514 | 0.004581 | no |
| ENSG00000158373 | H2BC5    | 37.538 | -1.038 | 0.299 | -3.466 | 0.000528 | 0.004694 | no |
| ENSG00000105516 | DBP      | 25.735 | -1.150 | 0.332 | -3.459 | 0.000542 | 0.004796 | no |
| ENSG00000233338 | TLR8-AS1 | 12.980 | -1.216 | 0.352 | -3.452 | 0.000556 | 0.004887 | no |
| ENSG00000167112 | TRUB2    | 38.480 | -0.739 | 0.214 | -3.452 | 0.000557 | 0.004888 | no |
| ENSG00000100426 | ZBED4    | 45.726 | -0.738 | 0.214 | -3.451 | 0.000559 | 0.004902 | no |
| ENSG00000101188 | NTSR1    | 24.675 | 1.004  | 0.291 | 3.450  | 0.00056  | 0.004908 | no |
| ENSG00000148459 | PDSS1    | 12.004 | -1.371 | 0.398 | -3.449 | 0.000562 | 0.004926 | no |
| ENSG00000189410 | SH2D5    | 23.755 | 0.940  | 0.273 | 3.448  | 0.000565 | 0.004946 | no |
| ENSG00000137868 | STRA6    | 25.027 | -1.009 | 0.293 | -3.442 | 0.000578 | 0.005039 | no |
| ENSG00000155158 | TTC39B   | 19.739 | 0.982  | 0.285 | 3.442  | 0.000578 | 0.005042 | no |
| ENSG00000141391 | PRELID3A | 14.274 | 1.324  | 0.385 | 3.440  | 0.000582 | 0.005065 | no |
| ENSG00000198689 | SLC9A6   | 27.467 | -0.966 | 0.281 | -3.439 | 0.000583 | 0.005067 | no |
| ENSG00000172932 | ANKRD13D | 17.765 | 1.229  | 0.358 | 3.438  | 0.000585 | 0.005081 | no |
| ENSG00000106615 | RHEB     | 50.557 | -0.701 | 0.204 | -3.438 | 0.000585 | 0.005081 | no |
| ENSG00000116191 | RALGPS2  | 52.993 | -0.829 | 0.241 | -3.435 | 0.000592 | 0.005127 | no |
| ENSG00000147592 | LACTB2   | 33.712 | 1.008  | 0.294 | 3.433  | 0.000598 | 0.005171 | no |
| ENSG00000139970 | RTN1     | 14.042 | -1.873 | 0.546 | -3.433 | 0.000598 | 0.005171 | no |
| ENSG00000186283 | TOR3A    | 21.526 | -0.987 | 0.288 | -3.429 | 0.000606 | 0.005232 | no |
| ENSG00000167702 | KIFC2    | 32.285 | 0.894  | 0.261 | 3.421  | 0.000624 | 0.005353 | no |

|                 |           |         |        |       |        |          |          |    |
|-----------------|-----------|---------|--------|-------|--------|----------|----------|----|
| ENSG00000170903 | MSANTD4   | 37.235  | 0.778  | 0.228 | 3.419  | 0.000628 | 0.00538  | no |
| ENSG00000154639 | CXADR     | 33.566  | -1.025 | 0.300 | -3.418 | 0.000631 | 0.005405 | no |
| ENSG00000011028 | MRC2      | 40.155  | -0.810 | 0.237 | -3.413 | 0.000643 | 0.005496 | no |
| ENSG00000005513 | SOX8      | 18.266  | -0.947 | 0.278 | -3.412 | 0.000644 | 0.005507 | no |
| ENSG00000113621 | TXNDC15   | 34.221  | -0.808 | 0.237 | -3.412 | 0.000645 | 0.00551  | no |
| ENSG00000269028 | MTRNR2L12 | 436.050 | 0.791  | 0.232 | 3.402  | 0.000668 | 0.005686 | no |
| ENSG00000189046 | ALKBH2    | 38.540  | 0.822  | 0.242 | 3.398  | 0.00068  | 0.005777 | no |
| ENSG00000083635 | NUFIP1    | 40.365  | -0.704 | 0.207 | -3.397 | 0.000682 | 0.005787 | no |
| ENSG00000135457 | TFCP2     | 42.551  | -0.800 | 0.236 | -3.392 | 0.000695 | 0.00588  | no |
| ENSG00000020577 | SAMD4A    | 32.099  | 0.903  | 0.267 | 3.389  | 0.000703 | 0.005938 | no |
| ENSG00000225648 | SBDSP1    | 44.520  | 0.713  | 0.211 | 3.387  | 0.000706 | 0.005957 | no |
| ENSG00000120333 | MRPS14    | 45.793  | -0.737 | 0.218 | -3.387 | 0.000707 | 0.005965 | no |
| ENSG00000152439 | ZNF773    | 13.405  | 1.192  | 0.352 | 3.386  | 0.00071  | 0.005978 | no |
| ENSG00000171606 | ZNF274    | 26.410  | 0.898  | 0.265 | 3.384  | 0.000714 | 0.006009 | no |
| ENSG00000164692 | COL1A2    | 39.909  | 1.052  | 0.311 | 3.380  | 0.000724 | 0.006086 | no |
| ENSG00000108175 | ZMIZ1     | 42.210  | 0.783  | 0.232 | 3.376  | 0.000735 | 0.006166 | no |
| ENSG00000214114 | MYCBP     | 19.004  | -1.013 | 0.301 | -3.369 | 0.000754 | 0.006302 | no |
| ENSG00000151553 | FHIP2A    | 21.750  | 1.224  | 0.363 | 3.368  | 0.000757 | 0.006326 | no |
| ENSG00000116729 | WLS       | 26.711  | -1.130 | 0.336 | -3.363 | 0.000771 | 0.00643  | no |
| ENSG00000243364 | EFNA4     | 11.595  | -1.315 | 0.392 | -3.359 | 0.000782 | 0.006512 | no |
| ENSG00000210196 | MT-TP     | 284.986 | 1.151  | 0.343 | 3.359  | 0.000782 | 0.006512 | no |
| ENSG00000182749 | PAQR7     | 24.958  | 1.147  | 0.342 | 3.356  | 0.00079  | 0.00657  | no |
| ENSG00000118096 | IFT46     | 16.778  | 1.101  | 0.329 | 3.350  | 0.000809 | 0.006723 | no |
| ENSG00000103024 | NME3      | 43.004  | 0.721  | 0.215 | 3.347  | 0.000816 | 0.006772 | no |
| ENSG00000153037 | SRP19     | 44.184  | -0.982 | 0.294 | -3.344 | 0.000826 | 0.006836 | no |
| ENSG00000275180 | n/a       | 11.358  | -1.283 | 0.384 | -3.342 | 0.000833 | 0.006884 | no |
| ENSG00000107485 | GATA3     | 19.230  | 1.613  | 0.484 | 3.336  | 0.000849 | 0.006992 | no |
| ENSG00000151690 | MFSD6     | 25.029  | -0.907 | 0.272 | -3.336 | 0.000849 | 0.006992 | no |
| ENSG00000134222 | PSRC1     | 33.857  | -0.778 | 0.233 | -3.333 | 0.000861 | 0.007068 | no |
| ENSG00000074590 | NUAK1     | 35.456  | 0.950  | 0.285 | 3.327  | 0.000878 | 0.007199 | no |
| ENSG00000132256 | TRIM5     | 19.317  | 1.170  | 0.352 | 3.326  | 0.00088  | 0.00721  | no |
| ENSG00000130244 | FAM98C    | 27.198  | 0.911  | 0.274 | 3.326  | 0.000883 | 0.007225 | no |
| ENSG00000197696 | NMB       | 18.861  | 0.922  | 0.278 | 3.319  | 0.000904 | 0.007378 | no |
| ENSG00000203760 | CENPW     | 37.742  | -0.844 | 0.254 | -3.317 | 0.000909 | 0.007407 | no |
| ENSG00000278970 | HEIH      | 41.499  | 0.710  | 0.214 | 3.316  | 0.000912 | 0.007427 | no |
| ENSG00000167766 | ZNF83     | 41.310  | 0.772  | 0.233 | 3.316  | 0.000914 | 0.007431 | no |
| ENSG00000100154 | TTC28     | 30.520  | 0.832  | 0.251 | 3.310  | 0.000932 | 0.007567 | no |
| ENSG00000136159 | NUDT15    | 26.040  | -0.977 | 0.295 | -3.308 | 0.000938 | 0.007611 | no |
| ENSG00000163346 | PBXIP1    | 22.147  | -1.014 | 0.306 | -3.307 | 0.000942 | 0.007633 | no |
| ENSG00000121211 | MND1      | 38.411  | -0.739 | 0.224 | -3.305 | 0.000949 | 0.007673 | no |
| ENSG00000171421 | MRPL36    | 46.326  | -0.888 | 0.269 | -3.296 | 0.000981 | 0.007901 | no |
| ENSG00000065809 | FAM107B   | 51.159  | -0.855 | 0.260 | -3.295 | 0.000986 | 0.007934 | no |
| ENSG00000110801 | PSMD9     | 57.234  | 0.725  | 0.220 | 3.293  | 0.00099  | 0.007957 | no |

|                 |          |        |        |       |        |          |          |    |
|-----------------|----------|--------|--------|-------|--------|----------|----------|----|
| ENSG00000145703 | IQGAP2   | 27.709 | -0.822 | 0.250 | -3.289 | 0.001004 | 0.008069 | no |
| ENSG00000143499 | SMYD2    | 29.913 | -0.786 | 0.239 | -3.289 | 0.001007 | 0.008084 | no |
| ENSG00000144736 | SHQ1     | 16.309 | -1.134 | 0.345 | -3.288 | 0.001007 | 0.008084 | no |
| ENSG00000158552 | ZFAND2B  | 16.887 | 1.296  | 0.394 | 3.288  | 0.00101  | 0.008091 | no |
| ENSG00000165821 | SALL2    | 17.867 | -0.962 | 0.294 | -3.273 | 0.001066 | 0.008493 | no |
| ENSG00000163491 | NEK10    | 10.083 | -1.432 | 0.438 | -3.268 | 0.001082 | 0.008599 | no |
| ENSG00000143515 | ATP8B2   | 22.661 | -0.803 | 0.247 | -3.258 | 0.001122 | 0.008852 | no |
| ENSG00000081721 | DUSP12   | 19.908 | -1.130 | 0.347 | -3.253 | 0.001142 | 0.008996 | no |
| ENSG00000156463 | SH3RF2   | 14.789 | 1.297  | 0.399 | 3.249  | 0.001157 | 0.009085 | no |
| ENSG00000147509 | RGS20    | 17.926 | 1.112  | 0.342 | 3.247  | 0.001167 | 0.009147 | no |
| ENSG00000113742 | CPEB4    | 41.271 | 0.910  | 0.280 | 3.245  | 0.001175 | 0.009189 | no |
| ENSG00000266028 | SRGAP2   | 31.396 | -0.784 | 0.242 | -3.245 | 0.001175 | 0.009189 | no |
| ENSG00000162341 | TPCN2    | 12.426 | 1.167  | 0.360 | 3.242  | 0.001187 | 0.009258 | no |
| ENSG00000201098 | RNY1     | 15.682 | -1.252 | 0.386 | -3.241 | 0.001191 | 0.00928  | no |
| ENSG00000083844 | ZNF264   | 43.711 | 0.736  | 0.227 | 3.240  | 0.001197 | 0.009318 | no |
| ENSG00000173064 | HECTD4   | 44.622 | 0.762  | 0.235 | 3.234  | 0.001219 | 0.009449 | no |
| ENSG00000066322 | ELOVL1   | 52.991 | 0.730  | 0.226 | 3.234  | 0.00122  | 0.009451 | no |
| ENSG00000175832 | ETV4     | 26.003 | 0.805  | 0.249 | 3.233  | 0.001227 | 0.009494 | no |
| ENSG00000165501 | LRR1     | 37.804 | -0.785 | 0.243 | -3.232 | 0.00123  | 0.009511 | no |
| ENSG00000110011 | DNAJC4   | 17.127 | 1.345  | 0.416 | 3.232  | 0.001231 | 0.009515 | no |
| ENSG00000166831 | RBPM52   | 16.038 | -1.076 | 0.333 | -3.231 | 0.001235 | 0.009539 | no |
| ENSG00000110844 | PRPF40B  | 24.113 | 1.004  | 0.311 | 3.230  | 0.001237 | 0.009555 | no |
| ENSG00000119138 | KLF9     | 24.007 | 0.983  | 0.305 | 3.224  | 0.001262 | 0.009723 | no |
| ENSG00000043514 | TRIT1    | 27.993 | -0.919 | 0.285 | -3.220 | 0.001282 | 0.009847 | no |
| ENSG00000165949 | IFI27    | 12.425 | 2.677  | 0.834 | 3.210  | 0.001326 | 0.010136 | no |
| ENSG00000183048 | SLC25A10 | 20.625 | -1.084 | 0.338 | -3.208 | 0.001338 | 0.010202 | no |
| ENSG00000131196 | NFATC1   | 26.543 | -0.755 | 0.236 | -3.203 | 0.001359 | 0.010352 | no |
| ENSG00000156671 | SAMD8    | 36.467 | 0.758  | 0.237 | 3.203  | 0.001362 | 0.010356 | no |
| ENSG00000263731 | n/a      | 12.358 | -1.350 | 0.422 | -3.198 | 0.001382 | 0.010498 | no |
| ENSG00000163913 | IFT122   | 24.996 | -0.899 | 0.282 | -3.191 | 0.001419 | 0.01074  | no |
| ENSG00000135821 | GLUL     | 10.157 | 1.522  | 0.478 | 3.188  | 0.001433 | 0.010827 | no |
| ENSG00000115594 | IL1R1    | 21.945 | 0.977  | 0.307 | 3.185  | 0.001447 | 0.010906 | no |
| ENSG00000135924 | DNAJB2   | 25.738 | 1.145  | 0.360 | 3.184  | 0.001451 | 0.010929 | no |
| ENSG00000106605 | BLVRA    | 31.990 | 0.746  | 0.235 | 3.181  | 0.001468 | 0.011045 | no |
| ENSG00000052795 | FNIP2    | 22.156 | 1.119  | 0.353 | 3.171  | 0.001517 | 0.011397 | no |
| ENSG00000196639 | HRH1     | 17.861 | 1.079  | 0.340 | 3.171  | 0.00152  | 0.011417 | no |
| ENSG00000147654 | EBAG9    | 44.352 | 0.810  | 0.256 | 3.170  | 0.001522 | 0.01142  | no |
| ENSG00000214357 | NEURL1B  | 54.359 | -0.774 | 0.244 | -3.168 | 0.001535 | 0.011494 | no |
| ENSG00000121940 | CLCC1    | 35.664 | -0.739 | 0.234 | -3.162 | 0.001566 | 0.01168  | no |
| ENSG00000080819 | CPOX     | 18.108 | -0.980 | 0.310 | -3.162 | 0.001568 | 0.011681 | no |
| ENSG00000149548 | CCDC15   | 19.921 | 0.950  | 0.300 | 3.161  | 0.00157  | 0.011692 | no |
| ENSG00000168268 | NT5DC2   | 32.604 | -0.899 | 0.284 | -3.161 | 0.001572 | 0.011692 | no |
| ENSG00000105290 | APLP1    | 19.012 | -1.122 | 0.355 | -3.160 | 0.001578 | 0.011733 | no |

|                 |            |         |        |       |        |          |          |    |
|-----------------|------------|---------|--------|-------|--------|----------|----------|----|
| ENSG00000102125 | TFAZZIN    | 43.948  | 0.730  | 0.231 | 3.157  | 0.001597 | 0.011856 | no |
| ENSG00000116691 | MIIP       | 21.422  | 0.936  | 0.297 | 3.155  | 0.001603 | 0.011894 | no |
| ENSG00000131650 | KREMEN2    | 14.994  | -1.015 | 0.322 | -3.150 | 0.001634 | 0.012084 | no |
| ENSG00000106803 | SEC61B     | 120.759 | -0.831 | 0.264 | -3.149 | 0.001636 | 0.012091 | no |
| ENSG00000129636 | ITFG1      | 34.453  | 0.770  | 0.245 | 3.148  | 0.001642 | 0.012133 | no |
| ENSG00000148572 | NRBF2      | 31.889  | 0.746  | 0.237 | 3.146  | 0.001655 | 0.012213 | no |
| ENSG00000151883 | PARP8      | 12.405  | -4.024 | 1.281 | -3.142 | 0.001679 | 0.012329 | no |
| ENSG0000019485  | PRDM11     | 16.920  | 0.952  | 0.303 | 3.142  | 0.001679 | 0.012329 | no |
| ENSG00000186854 | TRABD2A    | 16.485  | 0.946  | 0.302 | 3.136  | 0.001716 | 0.012536 | no |
| ENSG00000197375 | SLC22A5    | 17.965  | -1.029 | 0.329 | -3.127 | 0.001764 | 0.012865 | no |
| ENSG00000197183 | NOL4L      | 13.520  | -1.286 | 0.411 | -3.127 | 0.001768 | 0.012885 | no |
| ENSG00000246695 | RASSF8-AS1 | 22.532  | 1.116  | 0.357 | 3.126  | 0.001773 | 0.01291  | no |
| ENSG00000171488 | LRRRC8C    | 17.923  | -1.153 | 0.369 | -3.125 | 0.001779 | 0.012946 | no |
| ENSG00000183814 | LIN9       | 19.097  | -1.116 | 0.357 | -3.124 | 0.001783 | 0.012964 | no |
| ENSG00000112576 | CCND3      | 31.706  | -0.782 | 0.250 | -3.121 | 0.001802 | 0.013091 | no |
| ENSG00000155254 | MARVELD1   | 51.189  | 0.810  | 0.260 | 3.118  | 0.001822 | 0.013211 | no |
| ENSG00000142173 | COL6A2     | 22.957  | 0.953  | 0.306 | 3.117  | 0.001825 | 0.013225 | no |
| ENSG00000154237 | LRRK1      | 27.756  | 0.984  | 0.316 | 3.109  | 0.001878 | 0.013571 | no |
| ENSG00000198890 | PRMT6      | 11.878  | -1.272 | 0.410 | -3.105 | 0.001906 | 0.013744 | no |
| ENSG00000187801 | ZFP69B     | 10.258  | 1.486  | 0.479 | 3.104  | 0.001911 | 0.013762 | no |
| ENSG00000148175 | STOM       | 20.454  | 1.802  | 0.581 | 3.102  | 0.001921 | 0.01381  | no |
| ENSG00000115828 | QPCT       | 14.060  | -1.109 | 0.358 | -3.100 | 0.001932 | 0.013874 | no |
| ENSG00000196458 | ZNF605     | 33.796  | 0.799  | 0.258 | 3.098  | 0.001949 | 0.013974 | no |
| ENSG00000148835 | TAF5       | 27.098  | -0.811 | 0.262 | -3.098 | 0.00195  | 0.013976 | no |
| ENSG00000178202 | POGLUT3    | 35.090  | 0.782  | 0.252 | 3.097  | 0.001952 | 0.01398  | no |
| ENSG00000100077 | GRK3       | 17.420  | -1.030 | 0.333 | -3.092 | 0.00199  | 0.014174 | no |
| ENSG00000110046 | ATG2A      | 26.866  | 0.707  | 0.229 | 3.087  | 0.002021 | 0.014349 | no |
| ENSG00000162062 | TEDC2      | 10.519  | -1.884 | 0.610 | -3.087 | 0.002023 | 0.014359 | no |
| ENSG00000125827 | TMX4       | 59.062  | -0.725 | 0.235 | -3.087 | 0.002024 | 0.01436  | no |
| ENSG00000178996 | SNX18      | 40.111  | -0.710 | 0.230 | -3.083 | 0.00205  | 0.014515 | no |
| ENSG00000197757 | HOXC6      | 50.429  | 0.913  | 0.296 | 3.081  | 0.002066 | 0.014587 | no |
| ENSG00000182197 | EXT1       | 29.516  | 0.944  | 0.307 | 3.073  | 0.002116 | 0.014877 | no |
| ENSG00000205213 | LGR4       | 18.419  | 1.404  | 0.458 | 3.065  | 0.002179 | 0.015238 | no |
| ENSG00000129810 | SGO1       | 33.738  | -0.811 | 0.265 | -3.062 | 0.002201 | 0.015369 | no |
| ENSG00000162236 | STX5       | 24.469  | 0.834  | 0.273 | 3.057  | 0.002235 | 0.015566 | no |
| ENSG00000166169 | POLL       | 22.552  | 1.023  | 0.335 | 3.051  | 0.002282 | 0.015861 | no |
| ENSG00000149476 | TKFC       | 20.202  | 0.925  | 0.304 | 3.045  | 0.002325 | 0.016121 | no |
| ENSG00000184281 | TSSC4      | 50.711  | 0.746  | 0.245 | 3.045  | 0.002326 | 0.016122 | no |
| ENSG00000112655 | PTK7       | 62.903  | -0.745 | 0.245 | -3.044 | 0.002337 | 0.01619  | no |
| ENSG00000105486 | LIG1       | 36.635  | -0.767 | 0.252 | -3.041 | 0.002361 | 0.016337 | no |
| ENSG00000247627 | MTND4P12   | 23.075  | 0.747  | 0.246 | 3.037  | 0.002386 | 0.016452 | no |
| ENSG00000225791 | TRAM2-AS1  | 12.135  | 1.108  | 0.365 | 3.035  | 0.002407 | 0.01658  | no |
| ENSG00000118655 | DCLRE1B    | 15.763  | -1.268 | 0.418 | -3.031 | 0.002439 | 0.01677  | no |



|                 |             |        |        |       |        |          |          |    |
|-----------------|-------------|--------|--------|-------|--------|----------|----------|----|
| ENSG00000131153 | GINS2       | 40.498 | -0.719 | 0.237 | -3.030 | 0.002444 | 0.016777 | no |
| ENSG00000147536 | GINS4       | 26.098 | -0.774 | 0.256 | -3.029 | 0.002454 | 0.016823 | no |
| ENSG00000187193 | MT1X        | 41.928 | 0.704  | 0.233 | 3.023  | 0.002503 | 0.017125 | no |
| ENSG00000221164 | SNORA11F    | 12.141 | 1.295  | 0.429 | 3.020  | 0.002525 | 0.01726  | no |
| ENSG00000166435 | XRRA1       | 29.303 | 0.806  | 0.267 | 3.017  | 0.002553 | 0.017429 | no |
| ENSG00000112144 | CILK1       | 19.616 | 0.955  | 0.317 | 3.013  | 0.002588 | 0.017645 | no |
| ENSG00000133816 | MICAL2      | 47.046 | 0.706  | 0.235 | 3.009  | 0.002622 | 0.017817 | no |
| ENSG00000170500 | LONRF2      | 34.036 | 0.806  | 0.268 | 3.009  | 0.002623 | 0.017819 | no |
| ENSG00000071205 | ARHGAP10    | 26.392 | -0.948 | 0.315 | -3.005 | 0.002652 | 0.017976 | no |
| ENSG00000088305 | DNMT3B      | 10.958 | -1.244 | 0.414 | -3.005 | 0.002656 | 0.017988 | no |
| ENSG00000204498 | NFKBIL1     | 74.982 | 1.068  | 0.356 | 3.004  | 0.002661 | 0.018005 | no |
| ENSG00000159267 | H LCS       | 27.696 | 0.788  | 0.263 | 3.003  | 0.002676 | 0.018087 | no |
| ENSG00000240694 | PNMA2       | 22.303 | 0.943  | 0.314 | 2.999  | 0.002706 | 0.01826  | no |
| ENSG00000029534 | ANK1        | 41.932 | 0.763  | 0.255 | 2.988  | 0.002805 | 0.018812 | no |
| ENSG00000111875 | ASF1A       | 33.581 | 0.729  | 0.244 | 2.986  | 0.002823 | 0.018915 | no |
| ENSG00000183765 | CHEK2       | 27.492 | 0.867  | 0.291 | 2.985  | 0.002836 | 0.018972 | no |
| ENSG00000068001 | HYAL2       | 27.980 | -0.802 | 0.270 | -2.977 | 0.002913 | 0.019416 | no |
| ENSG00000137478 | FCHSD2      | 24.269 | 0.859  | 0.289 | 2.976  | 0.002921 | 0.019448 | no |
| ENSG00000185880 | TRIM69      | 13.487 | 1.181  | 0.397 | 2.975  | 0.00293  | 0.019485 | no |
| ENSG00000176401 | EID2B       | 25.919 | -0.891 | 0.300 | -2.973 | 0.002947 | 0.019577 | no |
| ENSG00000143368 | SF3B4       | 91.098 | -0.848 | 0.285 | -2.972 | 0.002959 | 0.019647 | no |
| ENSG00000215105 | TTC3P1      | 20.260 | -0.889 | 0.299 | -2.972 | 0.002963 | 0.019667 | no |
| ENSG00000231131 | LNCAROD     | 21.042 | 0.867  | 0.292 | 2.969  | 0.002986 | 0.019776 | no |
| ENSG00000125726 | CD70        | 49.997 | 0.955  | 0.322 | 2.969  | 0.002987 | 0.019778 | no |
| ENSG00000170412 | GPRC5C      | 13.774 | -1.177 | 0.398 | -2.961 | 0.003069 | 0.020221 | no |
| ENSG00000210184 | MT-TS2      | 62.084 | 1.028  | 0.347 | 2.960  | 0.003077 | 0.020249 | no |
| ENSG00000112874 | NUDT12      | 22.739 | -0.845 | 0.285 | -2.960 | 0.003081 | 0.020257 | no |
| ENSG00000221909 | FAM200A     | 22.588 | 0.904  | 0.306 | 2.956  | 0.003115 | 0.020451 | no |
| ENSG00000256940 | PPP1R14B-AS | 12.484 | 1.226  | 0.415 | 2.955  | 0.003129 | 0.020513 | no |
| ENSG00000170345 | FOS         | 64.560 | 0.967  | 0.327 | 2.953  | 0.003144 | 0.0206   | no |
| ENSG00000145740 | SLC30A5     | 36.618 | -0.726 | 0.246 | -2.953 | 0.003152 | 0.020639 | no |
| ENSG00000183421 | RIPK4       | 29.899 | 0.812  | 0.275 | 2.950  | 0.003177 | 0.020747 | no |
| ENSG00000106665 | CLIP2       | 12.018 | 1.386  | 0.471 | 2.943  | 0.003253 | 0.021127 | no |
| ENSG00000127328 | RAB3IP      | 49.901 | 0.776  | 0.264 | 2.942  | 0.003256 | 0.021133 | no |
| ENSG00000105136 | ZNF419      | 19.938 | 0.918  | 0.312 | 2.939  | 0.003292 | 0.021338 | no |
| ENSG00000137145 | DENND4C     | 25.139 | 0.878  | 0.299 | 2.939  | 0.003296 | 0.021356 | no |
| ENSG00000064042 | LIMCH1      | 45.875 | -1.368 | 0.466 | -2.937 | 0.003311 | 0.021439 | no |
| ENSG00000105696 | TMEM59L     | 20.464 | -0.788 | 0.270 | -2.922 | 0.003474 | 0.022388 | no |
| ENSG00000114383 | TUSC2       | 34.612 | -0.717 | 0.245 | -2.921 | 0.003486 | 0.022456 | no |
| ENSG00000100726 | TELO2       | 11.161 | -1.254 | 0.429 | -2.921 | 0.003489 | 0.022462 | no |
| ENSG00000171161 | ZNF672      | 13.552 | -1.260 | 0.431 | -2.921 | 0.003492 | 0.022472 | no |
| ENSG00000102078 | SLC25A14    | 16.903 | -0.961 | 0.329 | -2.919 | 0.003509 | 0.02257  | no |
| ENSG00000079257 | LXN         | 11.520 | -3.639 | 1.248 | -2.916 | 0.00355  | 0.022802 | no |

|                 |             |        |        |       |        |          |          |    |
|-----------------|-------------|--------|--------|-------|--------|----------|----------|----|
| ENSG00000167216 | KATNAL2     | 16.369 | 0.992  | 0.341 | 2.911  | 0.003599 | 0.023093 | no |
| ENSG00000146411 | SLC2A12     | 11.506 | 1.471  | 0.506 | 2.909  | 0.003623 | 0.023237 | no |
| ENSG00000175213 | ZNF408      | 12.458 | 1.192  | 0.410 | 2.905  | 0.003668 | 0.023445 | no |
| ENSG00000149289 | ZC3H12C     | 14.856 | 1.340  | 0.462 | 2.902  | 0.003711 | 0.023696 | no |
| ENSG00000160179 | ABCG1       | 14.395 | -1.006 | 0.347 | -2.897 | 0.003768 | 0.023999 | no |
| ENSG00000188747 | NOXA1       | 11.623 | 0.945  | 0.326 | 2.897  | 0.003769 | 0.023999 | no |
| ENSG00000116761 | CTH         | 15.695 | 0.901  | 0.312 | 2.888  | 0.003872 | 0.024481 | no |
| ENSG00000167965 | MLST8       | 25.044 | 1.013  | 0.351 | 2.887  | 0.003885 | 0.024549 | no |
| ENSG00000247092 | SNHG10      | 12.552 | -1.086 | 0.376 | -2.886 | 0.003899 | 0.024614 | no |
| ENSG00000136943 | CTSV        | 27.574 | -0.985 | 0.341 | -2.885 | 0.003912 | 0.024688 | no |
| ENSG00000137501 | SYTL2       | 36.286 | 1.390  | 0.482 | 2.883  | 0.003945 | 0.024868 | no |
| ENSG00000182362 | YBEY        | 14.242 | 1.205  | 0.419 | 2.879  | 0.003996 | 0.025141 | no |
| ENSG00000242588 | n/a         | 24.817 | 0.740  | 0.258 | 2.871  | 0.004087 | 0.025646 | no |
| ENSG00000144366 | GULP1       | 68.951 | 0.762  | 0.266 | 2.866  | 0.004156 | 0.026002 | no |
| ENSG00000187790 | FANCM       | 29.471 | -0.812 | 0.284 | -2.863 | 0.004198 | 0.026228 | no |
| ENSG00000130940 | CASZ1       | 24.439 | -0.931 | 0.325 | -2.862 | 0.004205 | 0.026261 | no |
| ENSG00000145723 | GIN1        | 10.822 | -1.228 | 0.429 | -2.862 | 0.004209 | 0.026271 | no |
| ENSG00000170946 | DNAJC24     | 27.412 | 0.760  | 0.266 | 2.859  | 0.004246 | 0.026429 | no |
| ENSG00000173852 | DPY19L1     | 36.091 | -0.767 | 0.268 | -2.859 | 0.004245 | 0.026429 | no |
| ENSG00000132563 | REEP2       | 19.295 | -0.832 | 0.291 | -2.858 | 0.004262 | 0.026518 | no |
| ENSG00000214944 | ARHGEF28    | 44.654 | 0.838  | 0.293 | 2.857  | 0.004281 | 0.026609 | no |
| ENSG00000139178 | C1RL        | 18.127 | 0.914  | 0.320 | 2.856  | 0.004294 | 0.026641 | no |
| ENSG00000184489 | PTP4A3      | 12.317 | 1.017  | 0.356 | 2.855  | 0.004301 | 0.026666 | no |
| ENSG00000158301 | GPRASP2     | 14.398 | -0.981 | 0.345 | -2.846 | 0.004427 | 0.027354 | no |
| ENSG00000105963 | ADAP1       | 18.436 | 1.028  | 0.361 | 2.844  | 0.004453 | 0.027477 | no |
| ENSG00000111224 | PARP11      | 13.250 | 0.978  | 0.344 | 2.840  | 0.004509 | 0.027755 | no |
| ENSG00000109189 | USP46       | 23.723 | -0.906 | 0.319 | -2.837 | 0.004559 | 0.028001 | no |
| ENSG00000177030 | DEAF1       | 43.028 | 0.774  | 0.273 | 2.833  | 0.004613 | 0.028303 | no |
| ENSG00000248593 | DSTNP2      | 11.106 | 1.277  | 0.451 | 2.831  | 0.004638 | 0.028393 | no |
| ENSG00000267750 | RUNDC3A-AS1 | 16.548 | 0.919  | 0.324 | 2.831  | 0.004639 | 0.028393 | no |
| ENSG00000170571 | EMB         | 23.465 | -1.932 | 0.683 | -2.828 | 0.004687 | 0.028575 | no |
| ENSG00000187231 | SESTD1      | 15.185 | -1.443 | 0.511 | -2.827 | 0.004699 | 0.028624 | no |
| ENSG00000067365 | METTL22     | 13.498 | 1.068  | 0.378 | 2.826  | 0.004707 | 0.028631 | no |
| ENSG00000124104 | SNX21       | 14.658 | 0.916  | 0.324 | 2.824  | 0.004736 | 0.028743 | no |
| ENSG00000167987 | VPS37C      | 29.984 | 0.728  | 0.258 | 2.823  | 0.004759 | 0.028841 | no |
| ENSG00000107537 | PHYH        | 28.315 | 0.780  | 0.277 | 2.816  | 0.004855 | 0.029265 | no |
| ENSG00000186635 | ARAP1       | 28.574 | 0.774  | 0.275 | 2.814  | 0.004893 | 0.02944  | no |
| ENSG00000187189 | TSPYL4      | 27.381 | -0.743 | 0.264 | -2.814 | 0.00489  | 0.02944  | no |
| ENSG00000108384 | RAD51C      | 27.353 | -0.799 | 0.284 | -2.813 | 0.004916 | 0.029522 | no |
| ENSG00000156973 | PDE6D       | 24.986 | -0.763 | 0.271 | -2.812 | 0.004918 | 0.029526 | no |
| ENSG00000185753 | CXorf38     | 16.089 | 0.998  | 0.355 | 2.810  | 0.004949 | 0.029682 | no |
| ENSG00000200090 | n/a         | 14.629 | 1.143  | 0.407 | 2.806  | 0.005011 | 0.029958 | no |
| ENSG00000168795 | ZBTB5       | 20.266 | -1.224 | 0.437 | -2.799 | 0.005133 | 0.030538 | no |

|                 |           |         |        |       |        |          |          |    |
|-----------------|-----------|---------|--------|-------|--------|----------|----------|----|
| ENSG00000143801 | PSEN2     | 17.851  | -0.866 | 0.311 | -2.788 | 0.005308 | 0.031422 | no |
| ENSG00000166199 | ALKBH3    | 18.906  | 1.018  | 0.366 | 2.784  | 0.00537  | 0.031683 | no |
| ENSG00000072609 | CHFR      | 20.266  | 0.870  | 0.312 | 2.784  | 0.005369 | 0.031683 | no |
| ENSG00000079156 | OSBPL6    | 16.455  | 0.794  | 0.285 | 2.782  | 0.005404 | 0.031825 | no |
| ENSG00000044090 | CUL7      | 20.704  | 0.814  | 0.293 | 2.780  | 0.005437 | 0.031978 | no |
| ENSG00000163545 | NUAK2     | 24.230  | -0.716 | 0.258 | -2.780 | 0.00544  | 0.031978 | no |
| ENSG00000167985 | SDHAF2    | 30.387  | 0.734  | 0.265 | 2.770  | 0.005604 | 0.032858 | no |
| ENSG00000104381 | GDAP1     | 17.715  | -0.988 | 0.357 | -2.769 | 0.005628 | 0.032966 | no |
| ENSG00000166896 | ATP23     | 10.330  | -1.324 | 0.478 | -2.768 | 0.005644 | 0.033047 | no |
| ENSG00000015133 | CCDC88C   | 26.721  | 0.703  | 0.254 | 2.768  | 0.005649 | 0.033047 | no |
| ENSG00000122971 | ACADS     | 13.117  | 1.011  | 0.366 | 2.764  | 0.005717 | 0.033433 | no |
| ENSG00000227036 | LINC00511 | 15.810  | 1.588  | 0.575 | 2.762  | 0.005744 | 0.033539 | no |
| ENSG00000059145 | UNKL      | 20.391  | -0.941 | 0.341 | -2.758 | 0.005812 | 0.033853 | no |
| ENSG00000143252 | SDHC      | 150.634 | -0.770 | 0.280 | -2.754 | 0.005886 | 0.034181 | no |
| ENSG00000071889 | FAM3A     | 37.955  | 0.702  | 0.256 | 2.747  | 0.00602  | 0.034778 | no |
| ENSG00000254614 | n/a       | 11.052  | 1.141  | 0.415 | 2.747  | 0.006023 | 0.034778 | no |
| ENSG00000178381 | ZFAND2A   | 16.167  | 1.084  | 0.396 | 2.742  | 0.006113 | 0.035226 | no |
| ENSG00000214756 | CSKMT     | 29.087  | 0.821  | 0.300 | 2.738  | 0.006184 | 0.035569 | no |
| ENSG00000259623 | n/a       | 21.686  | -0.827 | 0.303 | -2.734 | 0.006252 | 0.035849 | no |
| ENSG00000108439 | PNPO      | 25.506  | 0.947  | 0.347 | 2.732  | 0.006296 | 0.036091 | no |
| ENSG00000056558 | TRAF1     | 14.099  | 1.019  | 0.373 | 2.730  | 0.006335 | 0.036281 | no |
| ENSG00000102384 | CENPI     | 21.531  | -0.930 | 0.341 | -2.728 | 0.006364 | 0.036402 | no |
| ENSG00000081320 | STK17B    | 23.092  | -0.883 | 0.324 | -2.727 | 0.006391 | 0.036465 | no |
| ENSG00000256771 | ZNF253    | 10.541  | 1.253  | 0.459 | 2.727  | 0.006388 | 0.036465 | no |
| ENSG00000165997 | ARL5B     | 39.636  | 0.751  | 0.276 | 2.725  | 0.006423 | 0.036612 | no |
| ENSG00000213397 | HAUS7     | 22.769  | -0.732 | 0.269 | -2.723 | 0.006471 | 0.036791 | no |
| ENSG00000128656 | CHN1      | 14.698  | -1.024 | 0.377 | -2.717 | 0.006595 | 0.037398 | no |
| ENSG00000087008 | ACOX3     | 13.028  | 0.937  | 0.345 | 2.714  | 0.006647 | 0.037597 | no |
| ENSG00000197892 | KIF13B    | 17.929  | 0.812  | 0.299 | 2.712  | 0.006681 | 0.037712 | no |
| ENSG00000137760 | ALKBH8    | 16.848  | 0.884  | 0.326 | 2.711  | 0.0067   | 0.037773 | no |
| ENSG00000230148 | HOXB-AS1  | 17.023  | 0.930  | 0.344 | 2.706  | 0.006806 | 0.038317 | no |
| ENSG00000146242 | TPBG      | 17.319  | -1.062 | 0.393 | -2.706 | 0.006809 | 0.038319 | no |
| ENSG00000167700 | MFSD3     | 27.823  | 0.786  | 0.291 | 2.704  | 0.006842 | 0.038409 | no |
| ENSG00000131876 | SNRPA1    | 32.260  | -0.764 | 0.283 | -2.702 | 0.006895 | 0.038625 | no |
| ENSG00000132591 | ERAL1     | 22.434  | -0.745 | 0.276 | -2.701 | 0.006903 | 0.038652 | no |
| ENSG00000272079 | n/a       | 10.940  | -1.887 | 0.699 | -2.701 | 0.00691  | 0.038652 | no |
| ENSG00000203326 | ZNF525    | 14.140  | 3.390  | 1.255 | 2.701  | 0.006922 | 0.038662 | no |
| ENSG00000112149 | CD83      | 14.081  | 1.060  | 0.394 | 2.688  | 0.007189 | 0.039954 | no |
| ENSG00000085840 | ORC1      | 13.615  | -1.181 | 0.440 | -2.683 | 0.00729  | 0.04043  | no |
| ENSG00000075043 | KCNQ2     | 31.706  | -0.805 | 0.300 | -2.681 | 0.007345 | 0.040622 | no |
| ENSG00000160298 | C21orf58  | 26.668  | -0.742 | 0.277 | -2.679 | 0.007394 | 0.040801 | no |
| ENSG00000136631 | VPS45     | 28.640  | -0.737 | 0.275 | -2.679 | 0.007391 | 0.040801 | no |
| ENSG00000166575 | TMEM135   | 24.354  | 0.734  | 0.274 | 2.675  | 0.007483 | 0.041124 | no |

|                 |          |        |        |       |        |          |          |     |
|-----------------|----------|--------|--------|-------|--------|----------|----------|-----|
| ENSG00000147789 | ZNF7     | 21.454 | 0.928  | 0.348 | 2.669  | 0.007606 | 0.041767 | no  |
| ENSG00000120696 | KBTBD7   | 14.780 | -0.981 | 0.368 | -2.665 | 0.007708 | 0.042219 | no  |
| ENSG00000239282 | CASTOR1  | 16.553 | 0.851  | 0.320 | 2.658  | 0.007851 | 0.042896 | no  |
| ENSG00000107371 | EXOSC3   | 33.358 | -0.741 | 0.279 | -2.655 | 0.007936 | 0.043273 | no  |
| ENSG00000112855 | HARS2    | 22.750 | -0.765 | 0.288 | -2.653 | 0.007981 | 0.043462 | no  |
| ENSG00000173846 | PLK3     | 17.763 | 0.744  | 0.280 | 2.652  | 0.007996 | 0.043491 | no  |
| ENSG00000126705 | AHDC1    | 26.574 | -0.727 | 0.274 | -2.651 | 0.008016 | 0.043583 | no  |
| ENSG00000151332 | MBIP     | 16.966 | -0.861 | 0.325 | -2.651 | 0.008033 | 0.04364  | no  |
| ENSG00000116604 | MEF2D    | 33.766 | -0.730 | 0.276 | -2.649 | 0.008072 | 0.043763 | no  |
| ENSG00000078487 | ZCWPW1   | 16.513 | 0.800  | 0.302 | 2.649  | 0.008067 | 0.043763 | no  |
| ENSG00000183486 | MX2      | 17.337 | 0.841  | 0.318 | 2.645  | 0.008158 | 0.044177 | no  |
| ENSG00000189362 | NEMP2    | 12.632 | 0.967  | 0.366 | 2.645  | 0.008165 | 0.044195 | no  |
| ENSG00000279088 | n/a      | 16.384 | 0.764  | 0.290 | 2.638  | 0.008348 | 0.044948 | no  |
| ENSG00000196967 | ZNF585A  | 17.382 | 0.836  | 0.317 | 2.637  | 0.008364 | 0.044996 | no  |
| ENSG00000198040 | ZNF84    | 26.661 | 0.756  | 0.287 | 2.635  | 0.008404 | 0.045125 | no  |
| ENSG00000164741 | DLC1     | 29.053 | -0.838 | 0.318 | -2.634 | 0.008436 | 0.045276 | no  |
| ENSG00000138835 | RGS3     | 20.024 | -0.892 | 0.339 | -2.634 | 0.008443 | 0.045295 | no  |
| ENSG00000152661 | GJA1     | 24.475 | 1.569  | 0.596 | 2.631  | 0.008513 | 0.045636 | no  |
| ENSG00000178878 | APOLD1   | 19.764 | 0.766  | 0.291 | 2.630  | 0.008532 | 0.045718 | no  |
| ENSG00000158158 | CNNM4    | 23.097 | -0.801 | 0.305 | -2.630 | 0.008551 | 0.045801 | no  |
| ENSG00000104626 | ERI1     | 35.605 | 0.713  | 0.273 | 2.616  | 0.008905 | 0.047289 | no  |
| ENSG00000104671 | DCTN6    | 19.170 | -0.894 | 0.342 | -2.612 | 0.009007 | 0.047724 | no  |
| ENSG00000160191 | PDE9A    | 12.005 | 0.907  | 0.348 | 2.603  | 0.009239 | 0.048721 | no  |
| ENSG00000092445 | TYRO3    | 14.376 | -0.869 | 0.334 | -2.600 | 0.009332 | 0.049074 | no  |
| ENSG00000130675 | MNX1     | 19.097 | -0.795 | 0.306 | -2.597 | 0.009392 | 0.049355 | no  |
| ENSG00000145675 | PIK3R1   | 23.056 | -0.821 | 0.316 | -2.597 | 0.009415 | 0.049418 | no  |
| ENSG00000102781 | KATNAL1  | 20.911 | -0.761 | 0.294 | -2.585 | 0.009734 | 0.05079  | no  |
| ENSG00000152894 | PTPRK    | 15.832 | -1.438 | 0.557 | -2.580 | 0.009893 | 0.051498 | no  |
| ENSG00000171163 | ZNF692   | 22.690 | -0.852 | 0.331 | -2.578 | 0.009924 | 0.051641 | no  |
| ENSG00000066583 | ISOC1    | 27.047 | -0.855 | 0.332 | -2.576 | 0.010009 | 0.051962 | no  |
| ENSG00000271383 | NBPF19   | 11.912 | -0.937 | 0.364 | -2.572 | 0.010109 | 0.052238 | no  |
| ENSG00000174705 | SH3PXD2B | 22.492 | -0.808 | 0.314 | -2.571 | 0.010134 | 0.052304 | no  |
| ENSG00000123179 | EBPL     | 42.075 | -0.715 | 0.279 | -2.560 | 0.010452 | 0.053614 | no  |
| ENSG00000075234 | TTC38    | 12.531 | -0.960 | 0.375 | -2.561 | 0.010452 | 0.053614 | no  |
| ENSG00000010072 | SPRTN    | 24.245 | -0.752 | 0.294 | -2.559 | 0.01051  | 0.053826 | no  |
| ENSG00000103254 | ANTKMT   | 25.259 | -0.786 | 0.308 | -2.553 | 0.010688 | 0.054568 | no  |
| ENSG00000126603 | GLIS2    | 26.574 | -1.083 | 0.424 | -2.553 | 0.010685 | 0.054568 | no  |
| ENSG00000135525 | MAP7     | 20.347 | -1.252 | 0.493 | -2.540 | 0.011095 | 0.056218 | no  |
| ENSG00000198053 | SIRPA    | 15.235 | -0.830 | 0.328 | -2.530 | 0.011409 | 0.057458 | no  |
| ENSG00000062822 | POLD1    | 16.404 | -0.795 | 0.317 | -2.510 | 0.012073 | 0.059875 | no  |
| ENSG00000002079 | MYH16    | 15.842 | 2.628  | 0.405 | 6.497  | 8.20E-11 | 6.19E-09 | yes |
| ENSG00000006459 | KDM7A    | 20.969 | 1.081  | 0.308 | 3.506  | 0.000456 | 0.006546 | yes |

|                 |          |         |       |       |        |          |          |     |
|-----------------|----------|---------|-------|-------|--------|----------|----------|-----|
| ENSG00000011422 | PLAUR    | 131.985 | 1.274 | 0.203 | 6.285  | 3.29E-10 | 2.35E-08 | yes |
| ENSG00000013364 | MVP      | 48.713  | 0.903 | 0.239 | 3.776  | 0.000159 | 0.002752 | yes |
| ENSG00000014216 | CAPN1    | 71.156  | 0.794 | 0.199 | 3.994  | 6.50E-05 | 0.001284 | yes |
| ENSG00000016391 | CHDH     | 11.111  | 2.286 | 0.491 | 4.654  | 3.26E-06 | 9.25E-05 | yes |
| ENSG00000018408 | WWTR1    | 340.848 | 0.824 | 0.100 | 8.222  | 2.00E-16 | 2.83E-14 | yes |
| ENSG00000023191 | RNH1     | 160.440 | 0.875 | 0.123 | 7.092  | 1.32E-12 | 1.30E-10 | yes |
| ENSG00000023330 | ALAS1    | 46.836  | 1.050 | 0.257 | 4.079  | 4.52E-05 | 0.000944 | yes |
| ENSG00000023445 | BIRC3    | 139.420 | 2.357 | 0.144 | 16.377 | 2.77E-60 | 1.92E-56 | yes |
| ENSG00000026508 | CD44     | 874.240 | 1.020 | 0.075 | 13.580 | 5.28E-42 | 3.49E-39 | yes |
| ENSG00000028203 | VEZT     | 121.229 | 0.725 | 0.140 | 5.174  | 2.29E-07 | 8.54E-06 | yes |
| ENSG00000029153 | ARNTL2   | 29.363  | 1.295 | 0.435 | 2.974  | 0.002935 | 0.029065 | yes |
| ENSG00000041353 | RAB27B   | 130.622 | 2.448 | 0.167 | 14.617 | 2.20E-48 | 2.78E-45 | yes |
| ENSG00000042493 | CAPG     | 133.883 | 0.938 | 0.198 | 4.729  | 2.26E-06 | 6.68E-05 | yes |
| ENSG00000043039 | BARX2    | 14.526  | 1.719 | 0.371 | 4.634  | 3.59E-06 | 0.000101 | yes |
| ENSG00000048052 | HDAC9    | 42.298  | 1.715 | 0.247 | 6.947  | 3.73E-12 | 3.39E-10 | yes |
| ENSG00000049249 | TNFRSF9  | 14.223  | 2.046 | 0.382 | 5.354  | 8.59E-08 | 3.50E-06 | yes |
| ENSG00000050344 | NFE2L3   | 71.258  | 1.698 | 0.189 | 9.006  | 2.13E-19 | 4.30E-17 | yes |
| ENSG00000050820 | BCAR1    | 82.464  | 1.117 | 0.192 | 5.811  | 6.20E-09 | 3.44E-07 | yes |
| ENSG00000051108 | HERPUD1  | 68.204  | 1.066 | 0.202 | 5.265  | 1.40E-07 | 5.45E-06 | yes |
| ENSG00000051825 | MPHOSPH9 | 61.401  | 0.725 | 0.216 | 3.360  | 0.00078  | 0.010097 | yes |
| ENSG00000057294 | PKP2     | 16.342  | 1.818 | 0.501 | 3.633  | 0.000281 | 0.004404 | yes |
| ENSG00000059378 | PARP12   | 18.643  | 1.374 | 0.348 | 3.947  | 7.91E-05 | 0.001533 | yes |
| ENSG00000059758 | CDK17    | 30.264  | 1.324 | 0.292 | 4.531  | 5.88E-06 | 0.000156 | yes |
| ENSG00000064012 | CASP8    | 68.542  | 0.868 | 0.221 | 3.929  | 8.55E-05 | 0.001638 | yes |
| ENSG00000065308 | TRAM2    | 54.359  | 0.763 | 0.257 | 2.967  | 0.003006 | 0.029536 | yes |
| ENSG00000065613 | SLK      | 579.073 | 0.786 | 0.081 | 9.751  | 1.83E-22 | 4.47E-20 | yes |
| ENSG00000067066 | SP100    | 97.485  | 0.815 | 0.139 | 5.874  | 4.26E-09 | 2.46E-07 | yes |
| ENSG00000067715 | SYT1     | 38.240  | 0.813 | 0.247 | 3.293  | 0.00099  | 0.012297 | yes |
| ENSG00000069702 | TGFBR3   | 31.381  | 0.996 | 0.266 | 3.750  | 0.000177 | 0.002983 | yes |
| ENSG00000071242 | RPS6KA2  | 14.517  | 1.576 | 0.453 | 3.478  | 0.000506 | 0.007118 | yes |
| ENSG00000071575 | TRIB2    | 48.093  | 0.925 | 0.246 | 3.758  | 0.000171 | 0.002901 | yes |
| ENSG00000071967 | CYBRD1   | 23.600  | 0.784 | 0.279 | 2.805  | 0.005032 | 0.044191 | yes |
| ENSG00000072609 | CHFR     | 20.266  | 1.162 | 0.354 | 3.285  | 0.00102  | 0.012581 | yes |
| ENSG00000073417 | PDE8A    | 32.483  | 1.225 | 0.265 | 4.617  | 3.90E-06 | 0.000109 | yes |
| ENSG00000074201 | CLNS1A   | 215.795 | 0.759 | 0.115 | 6.582  | 4.63E-11 | 3.62E-09 | yes |
| ENSG00000075213 | SEMA3A   | 312.088 | 0.746 | 0.114 | 6.546  | 5.92E-11 | 4.57E-09 | yes |
| ENSG00000075223 | SEMA3C   | 148.607 | 2.345 | 0.156 | 15.024 | 5.08E-51 | 1.18E-47 | yes |
| ENSG00000075618 | FSCN1    | 157.715 | 1.363 | 0.162 | 8.400  | 4.46E-17 | 6.73E-15 | yes |
| ENSG00000075711 | DLG1     | 303.613 | 1.579 | 0.101 | 15.609 | 6.36E-55 | 2.21E-51 | yes |
| ENSG00000076685 | NT5C2    | 100.661 | 0.821 | 0.191 | 4.300  | 1.71E-05 | 0.000397 | yes |
| ENSG00000077238 | IL4R     | 26.778  | 0.839 | 0.277 | 3.030  | 0.002444 | 0.025359 | yes |
| ENSG00000077458 | FAM76B   | 39.247  | 0.754 | 0.263 | 2.865  | 0.004172 | 0.038136 | yes |
| ENSG00000078114 | NEBL     | 18.071  | 1.259 | 0.376 | 3.350  | 0.000809 | 0.010395 | yes |

|                 |           |         |       |       |        |          |          |     |
|-----------------|-----------|---------|-------|-------|--------|----------|----------|-----|
| ENSG00000080503 | SMARCA2   | 36.959  | 1.000 | 0.284 | 3.525  | 0.000424 | 0.006244 | yes |
| ENSG00000081041 | CXCL2     | 15.145  | 3.819 | 0.535 | 7.140  | 9.37E-13 | 9.71E-11 | yes |
| ENSG00000081923 | ATP8B1    | 15.469  | 3.687 | 1.236 | 2.983  | 0.002854 | 0.028483 | yes |
| ENSG00000085832 | EPS15     | 91.952  | 1.085 | 0.158 | 6.862  | 6.80E-12 | 5.98E-10 | yes |
| ENSG00000088826 | SMOX      | 40.989  | 1.020 | 0.225 | 4.542  | 5.57E-06 | 0.000149 | yes |
| ENSG00000089127 | OAS1      | 10.147  | 3.361 | 0.516 | 6.508  | 7.60E-11 | 5.80E-09 | yes |
| ENSG00000091136 | LAMB1     | 112.642 | 0.788 | 0.229 | 3.437  | 0.000588 | 0.008054 | yes |
| ENSG00000095383 | TBC1D2    | 29.632  | 1.080 | 0.285 | 3.789  | 0.000151 | 0.002629 | yes |
| ENSG00000099284 | MACROH2A2 | 15.393  | 0.901 | 0.305 | 2.959  | 0.003091 | 0.030096 | yes |
| ENSG00000099810 | MTAP      | 44.128  | 2.185 | 0.650 | 3.360  | 0.000779 | 0.010092 | yes |
| ENSG00000100106 | TRIOBP    | 24.536  | 1.138 | 0.331 | 3.439  | 0.000584 | 0.008038 | yes |
| ENSG00000100154 | TTC28     | 30.520  | 0.891 | 0.258 | 3.450  | 0.00056  | 0.007731 | yes |
| ENSG00000100219 | XBP1      | 99.308  | 0.714 | 0.151 | 4.714  | 2.43E-06 | 7.10E-05 | yes |
| ENSG00000100342 | APOL1     | 16.947  | 1.464 | 0.391 | 3.742  | 0.000183 | 0.003067 | yes |
| ENSG00000100441 | KHNYN     | 53.463  | 0.703 | 0.207 | 3.389  | 0.000701 | 0.009293 | yes |
| ENSG00000100612 | DHRS7     | 55.889  | 0.710 | 0.211 | 3.369  | 0.000753 | 0.00978  | yes |
| ENSG00000100852 | ARHGAP5   | 343.284 | 1.532 | 0.106 | 14.497 | 1.27E-47 | 1.26E-44 | yes |
| ENSG00000100906 | NFKBIA    | 387.539 | 0.857 | 0.119 | 7.211  | 5.55E-13 | 5.84E-11 | yes |
| ENSG00000100994 | PYGB      | 423.073 | 1.071 | 0.132 | 8.140  | 3.95E-16 | 5.37E-14 | yes |
| ENSG00000101187 | SLCO4A1   | 131.353 | 1.010 | 0.138 | 7.319  | 2.50E-13 | 2.67E-11 | yes |
| ENSG00000101213 | PTK6      | 11.450  | 1.486 | 0.438 | 3.395  | 0.000687 | 0.009139 | yes |
| ENSG00000101255 | TRIB3     | 93.875  | 0.876 | 0.187 | 4.688  | 2.75E-06 | 7.94E-05 | yes |
| ENSG00000101457 | DNTTIP1   | 135.358 | 1.101 | 0.154 | 7.133  | 9.85E-13 | 1.01E-10 | yes |
| ENSG00000101935 | AMMECR1   | 47.701  | 0.949 | 0.212 | 4.489  | 7.17E-06 | 0.000185 | yes |
| ENSG00000102218 | RP2       | 10.472  | 1.310 | 0.446 | 2.935  | 0.003331 | 0.032069 | yes |
| ENSG00000102897 | LYRM1     | 24.556  | 1.106 | 0.314 | 3.519  | 0.000434 | 0.006333 | yes |
| ENSG00000103037 | SETD6     | 28.378  | 0.829 | 0.270 | 3.066  | 0.002167 | 0.023148 | yes |
| ENSG00000103196 | CRISPLD2  | 26.530  | 1.269 | 0.305 | 4.168  | 3.08E-05 | 0.000673 | yes |
| ENSG00000103335 | PIEZO1    | 105.019 | 0.757 | 0.137 | 5.507  | 3.65E-08 | 1.63E-06 | yes |
| ENSG00000104332 | SFRP1     | 27.576  | 4.637 | 0.526 | 8.817  | 1.18E-18 | 2.15E-16 | yes |
| ENSG00000105810 | CDK6      | 198.946 | 2.309 | 0.209 | 11.022 | 2.98E-28 | 1.15E-25 | yes |
| ENSG00000105879 | CBLL1     | 40.693  | 0.780 | 0.230 | 3.395  | 0.000686 | 0.009135 | yes |
| ENSG00000105953 | OGDH      | 109.040 | 0.831 | 0.148 | 5.636  | 1.74E-08 | 8.53E-07 | yes |
| ENSG00000105993 | DNAJB6    | 174.925 | 0.916 | 0.116 | 7.892  | 2.96E-15 | 3.81E-13 | yes |
| ENSG00000106049 | HIBADH    | 13.181  | 1.214 | 0.388 | 3.128  | 0.00176  | 0.019787 | yes |
| ENSG00000106278 | PTPRZ1    | 19.690  | 1.467 | 0.372 | 3.944  | 8.01E-05 | 0.00155  | yes |
| ENSG00000106366 | SERPINE1  | 445.748 | 1.636 | 0.197 | 8.323  | 8.58E-17 | 1.26E-14 | yes |
| ENSG00000106392 | C1GALT1   | 57.719  | 0.700 | 0.240 | 2.924  | 0.003454 | 0.033005 | yes |
| ENSG00000106603 | COA1      | 46.300  | 0.885 | 0.246 | 3.597  | 0.000322 | 0.00495  | yes |
| ENSG00000107201 | DDX58     | 51.948  | 1.229 | 0.211 | 5.830  | 5.54E-09 | 3.11E-07 | yes |
| ENSG00000107438 | PDLIM1    | 80.576  | 1.805 | 0.309 | 5.850  | 4.92E-09 | 2.79E-07 | yes |
| ENSG00000107485 | GATA3     | 19.230  | 1.595 | 0.538 | 2.962  | 0.003058 | 0.029879 | yes |
| ENSG00000107554 | DNMBP     | 51.518  | 1.306 | 0.246 | 5.301  | 1.15E-07 | 4.61E-06 | yes |

|                 |         |          |       |       |        |          |          |     |
|-----------------|---------|----------|-------|-------|--------|----------|----------|-----|
| ENSG00000107798 | LIPA    | 110.684  | 0.916 | 0.164 | 5.577  | 2.45E-08 | 1.16E-06 | yes |
| ENSG00000107960 | STN1    | 23.481   | 1.126 | 0.296 | 3.805  | 0.000142 | 0.002501 | yes |
| ENSG00000107984 | DKK1    | 86.357   | 0.803 | 0.251 | 3.196  | 0.001393 | 0.016179 | yes |
| ENSG00000108342 | CSF3    | 19.686   | 2.846 | 0.308 | 9.234  | 2.60E-20 | 5.47E-18 | yes |
| ENSG00000108439 | PNPO    | 25.506   | 1.026 | 0.335 | 3.060  | 0.002211 | 0.023502 | yes |
| ENSG00000108511 | HOXB6   | 39.271   | 1.193 | 0.285 | 4.181  | 2.90E-05 | 0.000639 | yes |
| ENSG00000109452 | INPP4B  | 21.944   | 2.226 | 0.407 | 5.474  | 4.40E-08 | 1.93E-06 | yes |
| ENSG00000109572 | CLCN3   | 99.091   | 0.789 | 0.168 | 4.707  | 2.51E-06 | 7.29E-05 | yes |
| ENSG00000109929 | SC5D    | 21.698   | 1.231 | 0.424 | 2.903  | 0.003701 | 0.034818 | yes |
| ENSG00000110047 | EHD1    | 130.784  | 0.935 | 0.162 | 5.777  | 7.60E-09 | 4.08E-07 | yes |
| ENSG00000110057 | UNC93B1 | 34.506   | 1.233 | 0.326 | 3.789  | 0.000151 | 0.002633 | yes |
| ENSG00000110090 | CPT1A   | 91.930   | 1.440 | 0.232 | 6.201  | 5.62E-10 | 3.79E-08 | yes |
| ENSG00000110330 | BIRC2   | 163.381  | 0.748 | 0.131 | 5.693  | 1.25E-08 | 6.32E-07 | yes |
| ENSG00000110422 | HIPK3   | 68.229   | 1.180 | 0.215 | 5.493  | 3.95E-08 | 1.75E-06 | yes |
| ENSG00000110435 | PDHX    | 60.792   | 0.946 | 0.188 | 5.040  | 4.66E-07 | 1.63E-05 | yes |
| ENSG00000110871 | COQ5    | 40.545   | 0.809 | 0.235 | 3.438  | 0.000586 | 0.008042 | yes |
| ENSG00000110888 | CAPRIN2 | 428.918  | 0.706 | 0.123 | 5.766  | 8.12E-09 | 4.31E-07 | yes |
| ENSG00000110906 | KCTD10  | 39.135   | 0.720 | 0.247 | 2.921  | 0.003487 | 0.033203 | yes |
| ENSG00000111057 | KRT18   | 1526.946 | 0.751 | 0.074 | 10.147 | 3.43E-24 | 1.04E-21 | yes |
| ENSG00000111145 | ELK3    | 117.773  | 0.751 | 0.134 | 5.584  | 2.34E-08 | 1.11E-06 | yes |
| ENSG00000111331 | OAS3    | 42.949   | 2.382 | 0.252 | 9.435  | 3.90E-21 | 8.74E-19 | yes |
| ENSG00000111335 | OAS2    | 11.094   | 3.877 | 0.549 | 7.063  | 1.63E-12 | 1.59E-10 | yes |
| ENSG00000111450 | STX2    | 63.817   | 0.803 | 0.189 | 4.260  | 2.04E-05 | 0.000467 | yes |
| ENSG00000111671 | SPSB2   | 10.710   | 1.563 | 0.516 | 3.030  | 0.002444 | 0.025359 | yes |
| ENSG00000111696 | NT5DC3  | 23.371   | 1.027 | 0.345 | 2.976  | 0.002918 | 0.028996 | yes |
| ENSG00000111981 | ULBP1   | 33.227   | 0.833 | 0.290 | 2.872  | 0.004083 | 0.03752  | yes |
| ENSG00000112096 | SOD2    | 68.304   | 1.711 | 0.175 | 9.754  | 1.77E-22 | 4.40E-20 | yes |
| ENSG00000112715 | VEGFA   | 117.858  | 0.971 | 0.168 | 5.775  | 7.69E-09 | 4.11E-07 | yes |
| ENSG00000113070 | HBEGF   | 84.188   | 0.873 | 0.194 | 4.500  | 6.81E-06 | 0.000176 | yes |
| ENSG00000113161 | HMGCR   | 91.332   | 0.790 | 0.163 | 4.829  | 1.37E-06 | 4.27E-05 | yes |
| ENSG00000113594 | LIFR    | 46.563   | 1.158 | 0.232 | 5.002  | 5.69E-07 | 1.95E-05 | yes |
| ENSG00000114784 | EIF1B   | 39.843   | 0.745 | 0.243 | 3.067  | 0.002165 | 0.023148 | yes |
| ENSG00000115267 | IFIH1   | 41.210   | 2.323 | 0.237 | 9.809  | 1.03E-22 | 2.70E-20 | yes |
| ENSG00000115415 | STAT1   | 161.309  | 0.765 | 0.123 | 6.247  | 4.17E-10 | 2.91E-08 | yes |
| ENSG00000115594 | IL1R1   | 21.945   | 1.698 | 0.345 | 4.921  | 8.59E-07 | 2.84E-05 | yes |
| ENSG00000115902 | SLC1A4  | 23.250   | 0.995 | 0.328 | 3.036  | 0.002398 | 0.025014 | yes |
| ENSG00000116761 | CTH     | 15.695   | 1.162 | 0.383 | 3.030  | 0.002442 | 0.025359 | yes |
| ENSG00000117226 | GBP3    | 16.684   | 1.699 | 0.533 | 3.189  | 0.001428 | 0.016539 | yes |
| ENSG00000117472 | TSPAN1  | 34.754   | 2.142 | 0.253 | 8.460  | 2.68E-17 | 4.14E-15 | yes |
| ENSG00000117868 | ESYT2   | 123.129  | 0.841 | 0.141 | 5.947  | 2.73E-09 | 1.63E-07 | yes |
| ENSG00000117984 | CTSD    | 363.134  | 1.007 | 0.133 | 7.582  | 3.41E-14 | 3.98E-12 | yes |
| ENSG00000118096 | IFT46   | 16.778   | 1.269 | 0.363 | 3.498  | 0.00047  | 0.006678 | yes |
| ENSG00000118503 | TNFAIP3 | 11.743   | 1.455 | 0.389 | 3.745  | 0.000181 | 0.003036 | yes |

|                 |          |          |       |       |        |          |          |     |
|-----------------|----------|----------|-------|-------|--------|----------|----------|-----|
| ENSG00000118515 | SGK1     | 148.656  | 2.047 | 0.141 | 14.538 | 6.96E-48 | 7.44E-45 | yes |
| ENSG00000118640 | VAMP8    | 41.593   | 2.264 | 0.485 | 4.667  | 3.05E-06 | 8.69E-05 | yes |
| ENSG00000118971 | CCND2    | 20.415   | 1.238 | 0.448 | 2.760  | 0.005772 | 0.048802 | yes |
| ENSG00000119899 | SLC17A5  | 37.376   | 0.700 | 0.249 | 2.811  | 0.004943 | 0.043604 | yes |
| ENSG00000119917 | IFIT3    | 91.516   | 2.902 | 0.187 | 15.521 | 2.49E-54 | 6.93E-51 | yes |
| ENSG00000119922 | IFIT2    | 120.866  | 2.212 | 0.173 | 12.801 | 1.61E-37 | 9.34E-35 | yes |
| ENSG00000120008 | WDR11    | 49.901   | 0.822 | 0.223 | 3.683  | 0.000231 | 0.003732 | yes |
| ENSG00000120068 | HOXB8    | 94.497   | 1.849 | 0.284 | 6.505  | 7.78E-11 | 5.91E-09 | yes |
| ENSG00000120075 | HOXB5    | 124.243  | 1.749 | 0.211 | 8.283  | 1.20E-16 | 1.71E-14 | yes |
| ENSG00000120093 | HOXB3    | 58.243   | 0.937 | 0.236 | 3.962  | 7.42E-05 | 0.001447 | yes |
| ENSG00000120129 | DUSP1    | 42.794   | 1.149 | 0.282 | 4.077  | 4.56E-05 | 0.000945 | yes |
| ENSG00000120451 | SNX19    | 40.270   | 1.406 | 0.290 | 4.854  | 1.21E-06 | 3.86E-05 | yes |
| ENSG00000120458 | MSANTD2  | 19.903   | 0.948 | 0.331 | 2.861  | 0.004224 | 0.038483 | yes |
| ENSG00000120708 | TGFBI    | 70.573   | 0.743 | 0.213 | 3.482  | 0.000498 | 0.007026 | yes |
| ENSG00000120925 | RNF170   | 16.730   | 1.108 | 0.320 | 3.465  | 0.00053  | 0.007365 | yes |
| ENSG00000122550 | KLHL7    | 17.779   | 0.958 | 0.338 | 2.832  | 0.004631 | 0.041321 | yes |
| ENSG00000122557 | HERPUD2  | 59.586   | 0.764 | 0.203 | 3.770  | 0.000163 | 0.002794 | yes |
| ENSG00000122674 | CCZ1     | 60.742   | 0.941 | 0.254 | 3.708  | 0.000209 | 0.003439 | yes |
| ENSG00000122678 | POLM     | 20.314   | 1.341 | 0.425 | 3.152  | 0.001623 | 0.018496 | yes |
| ENSG00000122861 | PLAU     | 296.797  | 1.706 | 0.587 | 2.905  | 0.003671 | 0.034583 | yes |
| ENSG00000122912 | SLC25A16 | 15.585   | 1.141 | 0.383 | 2.979  | 0.002889 | 0.028776 | yes |
| ENSG00000123066 | MED13L   | 161.992  | 0.947 | 0.175 | 5.396  | 6.81E-08 | 2.84E-06 | yes |
| ENSG00000123094 | RASSF8   | 172.841  | 1.518 | 0.149 | 10.217 | 1.66E-24 | 5.13E-22 | yes |
| ENSG00000123096 | SSPN     | 20.332   | 1.267 | 0.329 | 3.855  | 0.000116 | 0.00211  | yes |
| ENSG00000123240 | OPTN     | 166.154  | 0.706 | 0.113 | 6.250  | 4.09E-10 | 2.87E-08 | yes |
| ENSG00000123609 | NMI      | 72.742   | 0.897 | 0.199 | 4.514  | 6.37E-06 | 0.000167 | yes |
| ENSG00000124104 | SNX21    | 14.658   | 0.916 | 0.330 | 2.774  | 0.005532 | 0.047215 | yes |
| ENSG00000124145 | SDC4     | 197.324  | 0.933 | 0.134 | 6.955  | 3.53E-12 | 3.23E-10 | yes |
| ENSG00000124839 | RAB17    | 13.931   | 2.947 | 0.902 | 3.267  | 0.001087 | 0.013198 | yes |
| ENSG00000124942 | AHNAK    | 439.064  | 0.924 | 0.084 | 10.982 | 4.65E-28 | 1.70E-25 | yes |
| ENSG00000125347 | IRF1     | 57.214   | 0.815 | 0.174 | 4.691  | 2.72E-06 | 7.87E-05 | yes |
| ENSG00000125398 | SOX9     | 339.357  | 2.066 | 0.112 | 18.440 | 6.27E-76 | 8.71E-72 | yes |
| ENSG00000125618 | PAX8     | 14.817   | 2.463 | 0.416 | 5.917  | 3.27E-09 | 1.92E-07 | yes |
| ENSG00000125637 | PSD4     | 27.381   | 1.481 | 0.243 | 6.089  | 1.14E-09 | 7.27E-08 | yes |
| ENSG00000125740 | FOSB     | 67.021   | 0.914 | 0.235 | 3.892  | 9.93E-05 | 0.001864 | yes |
| ENSG00000126709 | IFI6     | 41.801   | 1.723 | 0.232 | 7.422  | 1.15E-13 | 1.27E-11 | yes |
| ENSG00000126777 | KTN1     | 2524.085 | 0.843 | 0.066 | 12.726 | 4.25E-37 | 2.36E-34 | yes |
| ENSG00000126821 | SGPP1    | 31.367   | 1.103 | 0.287 | 3.846  | 0.00012  | 0.002173 | yes |
| ENSG00000126934 | MAP2K2   | 233.020  | 0.730 | 0.131 | 5.562  | 2.67E-08 | 1.24E-06 | yes |
| ENSG00000127603 | MACF1    | 714.172  | 1.213 | 0.081 | 14.896 | 3.52E-50 | 5.44E-47 | yes |
| ENSG00000128342 | LIF      | 13.639   | 2.149 | 0.749 | 2.869  | 0.004121 | 0.037792 | yes |
| ENSG00000128564 | VGF      | 41.804   | 1.012 | 0.251 | 4.034  | 5.48E-05 | 0.001113 | yes |
| ENSG00000128567 | PODXL    | 164.094  | 1.890 | 0.285 | 6.627  | 3.42E-11 | 2.73E-09 | yes |



|                 |          |         |       |       |        |          |          |     |
|-----------------|----------|---------|-------|-------|--------|----------|----------|-----|
| ENSG00000128965 | CHAC1    | 50.149  | 0.905 | 0.256 | 3.530  | 0.000415 | 0.00614  | yes |
| ENSG00000130024 | PHF10    | 58.379  | 0.896 | 0.213 | 4.212  | 2.53E-05 | 0.000563 | yes |
| ENSG00000130303 | BST2     | 32.864  | 1.585 | 0.302 | 5.246  | 1.55E-07 | 5.99E-06 | yes |
| ENSG00000130589 | HELZ2    | 82.030  | 0.935 | 0.152 | 6.169  | 6.89E-10 | 4.58E-08 | yes |
| ENSG00000130779 | CLIP1    | 493.116 | 0.750 | 0.086 | 8.692  | 3.55E-18 | 5.94E-16 | yes |
| ENSG00000131069 | ACSS2    | 12.663  | 1.246 | 0.408 | 3.055  | 0.002247 | 0.023777 | yes |
| ENSG00000132109 | TRIM21   | 10.539  | 1.317 | 0.467 | 2.820  | 0.004803 | 0.042502 | yes |
| ENSG00000132141 | CCT6B    | 10.111  | 1.299 | 0.443 | 2.934  | 0.003345 | 0.032178 | yes |
| ENSG00000132254 | ARFIP2   | 22.151  | 0.960 | 0.345 | 2.788  | 0.005309 | 0.0457   | yes |
| ENSG00000132386 | SERPINF1 | 18.415  | 2.084 | 0.346 | 6.021  | 1.74E-09 | 1.07E-07 | yes |
| ENSG00000132470 | ITGB4    | 100.207 | 1.629 | 0.167 | 9.766  | 1.57E-22 | 3.96E-20 | yes |
| ENSG00000133316 | WDR74    | 38.893  | 0.760 | 0.247 | 3.080  | 0.002071 | 0.022465 | yes |
| ENSG00000133321 | PLAAT4   | 16.122  | 2.254 | 0.384 | 5.872  | 4.32E-09 | 2.47E-07 | yes |
| ENSG00000134107 | BHLHE40  | 22.550  | 1.089 | 0.384 | 2.837  | 0.004553 | 0.040894 | yes |
| ENSG00000134824 | FADS2    | 24.100  | 1.468 | 0.376 | 3.907  | 9.33E-05 | 0.001763 | yes |
| ENSG00000134954 | ETS1     | 77.960  | 0.831 | 0.204 | 4.071  | 4.67E-05 | 0.000964 | yes |
| ENSG00000135046 | ANXA1    | 412.100 | 1.121 | 0.082 | 13.631 | 2.62E-42 | 1.92E-39 | yes |
| ENSG00000135114 | OASL     | 32.690  | 2.931 | 0.284 | 10.338 | 4.73E-25 | 1.49E-22 | yes |
| ENSG00000135241 | PNPLA8   | 48.264  | 1.025 | 0.239 | 4.297  | 1.73E-05 | 0.000401 | yes |
| ENSG00000135318 | NT5E     | 187.939 | 2.074 | 0.150 | 13.820 | 1.92E-43 | 1.57E-40 | yes |
| ENSG00000135373 | EHF      | 65.538  | 1.490 | 0.189 | 7.882  | 3.21E-15 | 4.06E-13 | yes |
| ENSG00000135378 | PRRG4    | 33.113  | 1.585 | 0.277 | 5.726  | 1.03E-08 | 5.29E-07 | yes |
| ENSG00000135452 | TSPAN31  | 10.144  | 3.302 | 1.083 | 3.050  | 0.002287 | 0.02402  | yes |
| ENSG00000135821 | GLUL     | 10.157  | 1.452 | 0.493 | 2.946  | 0.003218 | 0.03114  | yes |
| ENSG00000135842 | NIBAN1   | 91.798  | 0.944 | 0.180 | 5.251  | 1.51E-07 | 5.85E-06 | yes |
| ENSG00000135899 | SP110    | 55.371  | 0.808 | 0.167 | 4.835  | 1.33E-06 | 4.18E-05 | yes |
| ENSG00000135926 | TMBIM1   | 68.198  | 0.912 | 0.236 | 3.872  | 0.000108 | 0.001993 | yes |
| ENSG00000136048 | DRAM1    | 21.959  | 0.953 | 0.324 | 2.944  | 0.003238 | 0.031283 | yes |
| ENSG00000136051 | WASHC4   | 103.437 | 0.714 | 0.146 | 4.883  | 1.04E-06 | 3.36E-05 | yes |
| ENSG00000136193 | SCRN1    | 139.297 | 0.753 | 0.176 | 4.287  | 1.81E-05 | 0.000417 | yes |
| ENSG00000137285 | TUBB2B   | 36.388  | 2.063 | 0.382 | 5.403  | 6.55E-08 | 2.74E-06 | yes |
| ENSG00000137478 | FCHSD2   | 24.269  | 1.082 | 0.292 | 3.700  | 0.000215 | 0.003527 | yes |
| ENSG00000137492 | THAP12   | 42.401  | 0.838 | 0.236 | 3.555  | 0.000378 | 0.005713 | yes |
| ENSG00000137500 | CCDC90B  | 64.404  | 0.785 | 0.187 | 4.196  | 2.72E-05 | 0.000602 | yes |
| ENSG00000137628 | DDX60    | 61.775  | 1.969 | 0.252 | 7.797  | 6.32E-15 | 7.77E-13 | yes |
| ENSG00000137720 | C11orf1  | 15.924  | 1.577 | 0.386 | 4.083  | 4.44E-05 | 0.000927 | yes |
| ENSG00000137760 | ALKBH8   | 16.848  | 1.095 | 0.381 | 2.874  | 0.004053 | 0.037341 | yes |
| ENSG00000137831 | UACA     | 595.936 | 1.473 | 0.091 | 16.194 | 5.55E-59 | 2.57E-55 | yes |
| ENSG00000137962 | ARHGAP29 | 523.492 | 0.931 | 0.102 | 9.103  | 8.82E-20 | 1.83E-17 | yes |
| ENSG00000137965 | IFI44    | 10.619  | 2.302 | 0.689 | 3.341  | 0.000835 | 0.010689 | yes |
| ENSG00000138018 | SELENOI  | 43.767  | 0.958 | 0.239 | 4.008  | 6.13E-05 | 0.001221 | yes |
| ENSG00000138459 | SLC35A5  | 11.217  | 2.653 | 0.758 | 3.501  | 0.000463 | 0.006609 | yes |
| ENSG00000138496 | PARP9    | 33.877  | 1.106 | 0.225 | 4.917  | 8.81E-07 | 2.89E-05 | yes |

|                 |          |         |       |       |        |          |          |     |
|-----------------|----------|---------|-------|-------|--------|----------|----------|-----|
| ENSG00000138642 | HERC6    | 13.369  | 2.169 | 0.394 | 5.506  | 3.66E-08 | 1.63E-06 | yes |
| ENSG00000138646 | HERC5    | 46.361  | 3.019 | 0.272 | 11.114 | 1.07E-28 | 4.25E-26 | yes |
| ENSG00000138678 | GPAT3    | 78.062  | 1.589 | 0.183 | 8.704  | 3.21E-18 | 5.58E-16 | yes |
| ENSG00000138685 | FGF2     | 45.520  | 1.107 | 0.187 | 5.928  | 3.07E-09 | 1.82E-07 | yes |
| ENSG00000139083 | ETV6     | 32.068  | 1.089 | 0.280 | 3.886  | 0.000102 | 0.001904 | yes |
| ENSG00000139433 | GLTP     | 82.601  | 1.358 | 0.157 | 8.642  | 5.52E-18 | 9.02E-16 | yes |
| ENSG00000139926 | FRMD6    | 38.137  | 1.059 | 0.373 | 2.836  | 0.004566 | 0.040918 | yes |
| ENSG00000140105 | WARS1    | 362.491 | 1.272 | 0.095 | 13.325 | 1.67E-40 | 1.05E-37 | yes |
| ENSG00000140403 | DNAJA4   | 13.262  | 2.746 | 0.487 | 5.638  | 1.72E-08 | 8.44E-07 | yes |
| ENSG00000140931 | CMTM3    | 46.713  | 0.718 | 0.211 | 3.406  | 0.000659 | 0.008843 | yes |
| ENSG00000141068 | KSR1     | 13.823  | 1.472 | 0.406 | 3.623  | 0.000291 | 0.004549 | yes |
| ENSG00000141574 | SECTM1   | 15.069  | 1.505 | 0.334 | 4.505  | 6.63E-06 | 0.000173 | yes |
| ENSG00000141682 | PMAIP1   | 96.891  | 1.560 | 0.167 | 9.330  | 1.06E-20 | 2.31E-18 | yes |
| ENSG00000142089 | IFITM3   | 481.099 | 1.089 | 0.124 | 8.805  | 1.31E-18 | 2.33E-16 | yes |
| ENSG00000142102 | PGGHG    | 24.862  | 0.865 | 0.296 | 2.921  | 0.003485 | 0.033203 | yes |
| ENSG00000142197 | DOP1B    | 23.313  | 1.014 | 0.254 | 3.999  | 6.36E-05 | 0.001259 | yes |
| ENSG00000142694 | EVA1B    | 13.884  | 1.230 | 0.407 | 3.024  | 0.002494 | 0.025768 | yes |
| ENSG00000142798 | HSPG2    | 37.566  | 1.219 | 0.238 | 5.117  | 3.10E-07 | 1.13E-05 | yes |
| ENSG00000143153 | ATP1B1   | 231.955 | 0.801 | 0.152 | 5.276  | 1.32E-07 | 5.17E-06 | yes |
| ENSG00000144118 | RALB     | 147.436 | 0.703 | 0.140 | 5.014  | 5.32E-07 | 1.83E-05 | yes |
| ENSG00000144468 | RHBDD1   | 17.411  | 1.207 | 0.369 | 3.272  | 0.001068 | 0.013077 | yes |
| ENSG00000144802 | NFKBIZ   | 37.663  | 2.702 | 0.268 | 10.096 | 5.73E-24 | 1.69E-21 | yes |
| ENSG00000145022 | TCTA     | 18.609  | 1.359 | 0.400 | 3.394  | 0.00069  | 0.009164 | yes |
| ENSG00000145362 | ANK2     | 17.689  | 1.659 | 0.367 | 4.521  | 6.16E-06 | 0.000163 | yes |
| ENSG00000145623 | OSMR     | 33.225  | 1.290 | 0.298 | 4.324  | 1.53E-05 | 0.000362 | yes |
| ENSG00000146411 | SLC2A12  | 11.506  | 1.658 | 0.534 | 3.104  | 0.001909 | 0.021083 | yes |
| ENSG00000146535 | GNA12    | 77.220  | 0.744 | 0.180 | 4.138  | 3.50E-05 | 0.000755 | yes |
| ENSG00000146648 | EGFR     | 299.075 | 1.102 | 0.098 | 11.269 | 1.86E-29 | 7.82E-27 | yes |
| ENSG00000147251 | DOCK11   | 136.232 | 1.019 | 0.117 | 8.680  | 3.96E-18 | 6.54E-16 | yes |
| ENSG00000147509 | RGS20    | 17.926  | 1.641 | 0.373 | 4.399  | 1.09E-05 | 0.000266 | yes |
| ENSG00000148175 | STOM     | 20.454  | 2.414 | 0.671 | 3.597  | 0.000322 | 0.00495  | yes |
| ENSG00000148180 | GSN      | 97.885  | 1.154 | 0.176 | 6.558  | 5.45E-11 | 4.23E-09 | yes |
| ENSG00000148484 | RSU1     | 103.583 | 0.714 | 0.137 | 5.218  | 1.80E-07 | 6.88E-06 | yes |
| ENSG00000148719 | DNAJB12  | 51.699  | 0.724 | 0.226 | 3.202  | 0.001362 | 0.015894 | yes |
| ENSG00000149089 | APIP     | 33.334  | 0.751 | 0.238 | 3.151  | 0.001629 | 0.018551 | yes |
| ENSG00000149100 | EIF3M    | 300.532 | 0.809 | 0.199 | 4.059  | 4.92E-05 | 0.001013 | yes |
| ENSG00000149196 | HIKESHI  | 46.521  | 0.895 | 0.252 | 3.548  | 0.000388 | 0.005841 | yes |
| ENSG00000149311 | ATM      | 103.505 | 0.823 | 0.154 | 5.356  | 8.51E-08 | 3.48E-06 | yes |
| ENSG00000149485 | FADS1    | 149.671 | 1.030 | 0.162 | 6.343  | 2.25E-10 | 1.64E-08 | yes |
| ENSG00000149743 | TRPT1    | 16.733  | 1.526 | 0.488 | 3.130  | 0.001745 | 0.019653 | yes |
| ENSG00000149798 | CDC42EP2 | 14.100  | 1.644 | 0.556 | 2.957  | 0.003108 | 0.030242 | yes |
| ENSG00000151491 | EPS8     | 70.878  | 1.470 | 0.266 | 5.537  | 3.07E-08 | 1.40E-06 | yes |
| ENSG00000151657 | KIN      | 35.877  | 0.818 | 0.242 | 3.376  | 0.000735 | 0.009633 | yes |

|                 |          |         |       |       |        |          |          |     |
|-----------------|----------|---------|-------|-------|--------|----------|----------|-----|
| ENSG00000151746 | BICD1    | 58.091  | 0.920 | 0.205 | 4.483  | 7.35E-06 | 0.000189 | yes |
| ENSG00000152464 | RPP38    | 38.179  | 0.801 | 0.227 | 3.536  | 0.000407 | 0.006041 | yes |
| ENSG00000152778 | IFIT5    | 23.241  | 1.099 | 0.277 | 3.973  | 7.11E-05 | 0.001394 | yes |
| ENSG00000153827 | TRIP12   | 512.769 | 0.785 | 0.092 | 8.504  | 1.83E-17 | 2.85E-15 | yes |
| ENSG00000154027 | AK5      | 28.914  | 2.608 | 0.300 | 8.696  | 3.45E-18 | 5.85E-16 | yes |
| ENSG00000154127 | UBASH3B  | 39.175  | 1.666 | 0.448 | 3.717  | 0.000201 | 0.003325 | yes |
| ENSG00000154133 | ROBO4    | 29.565  | 1.488 | 0.257 | 5.798  | 6.73E-09 | 3.71E-07 | yes |
| ENSG00000154134 | ROBO3    | 34.176  | 1.290 | 0.252 | 5.113  | 3.17E-07 | 1.15E-05 | yes |
| ENSG00000154237 | LRRK1    | 27.756  | 0.973 | 0.314 | 3.101  | 0.001927 | 0.02123  | yes |
| ENSG00000154263 | ABCA10   | 36.405  | 4.149 | 0.305 | 13.604 | 3.77E-42 | 2.62E-39 | yes |
| ENSG00000154265 | ABCA5    | 15.330  | 1.411 | 0.333 | 4.241  | 2.22E-05 | 0.000503 | yes |
| ENSG00000154874 | CCDC144B | 13.993  | 1.160 | 0.328 | 3.538  | 0.000404 | 0.006017 | yes |
| ENSG00000155158 | TTC39B   | 19.739  | 0.913 | 0.295 | 3.097  | 0.001957 | 0.021453 | yes |
| ENSG00000155744 | FAM126B  | 40.289  | 0.714 | 0.234 | 3.059  | 0.002223 | 0.023582 | yes |
| ENSG00000156011 | PSD3     | 103.303 | 1.644 | 0.176 | 9.348  | 8.91E-21 | 1.96E-18 | yes |
| ENSG00000156273 | BACH1    | 36.013  | 1.595 | 0.229 | 6.955  | 3.52E-12 | 3.23E-10 | yes |
| ENSG00000156374 | PCGF6    | 16.481  | 1.060 | 0.345 | 3.072  | 0.002128 | 0.022868 | yes |
| ENSG00000156384 | SFR1     | 26.567  | 1.099 | 0.253 | 4.339  | 1.43E-05 | 0.000341 | yes |
| ENSG00000156453 | PCDH1    | 96.811  | 2.604 | 0.228 | 11.424 | 3.19E-30 | 1.38E-27 | yes |
| ENSG00000156521 | TYSND1   | 32.277  | 1.259 | 0.244 | 5.166  | 2.39E-07 | 8.85E-06 | yes |
| ENSG00000156535 | CD109    | 69.154  | 0.708 | 0.199 | 3.561  | 0.00037  | 0.005593 | yes |
| ENSG00000156587 | UBE2L6   | 28.588  | 1.147 | 0.254 | 4.519  | 6.21E-06 | 0.000164 | yes |
| ENSG00000156599 | ZDHHCS   | 85.511  | 0.707 | 0.188 | 3.761  | 0.000169 | 0.002866 | yes |
| ENSG00000156603 | MED19    | 74.429  | 0.850 | 0.193 | 4.398  | 1.09E-05 | 0.000267 | yes |
| ENSG00000157483 | MYO1E    | 69.543  | 0.737 | 0.174 | 4.240  | 2.23E-05 | 0.000503 | yes |
| ENSG00000158604 | TMED4    | 110.474 | 0.747 | 0.152 | 4.927  | 8.33E-07 | 2.78E-05 | yes |
| ENSG00000158805 | ZNF276   | 31.785  | 0.745 | 0.262 | 2.841  | 0.004496 | 0.040457 | yes |
| ENSG00000159110 | IFNAR2   | 24.908  | 0.918 | 0.280 | 3.274  | 0.001059 | 0.012981 | yes |
| ENSG00000159128 | IFNGR2   | 112.200 | 0.869 | 0.235 | 3.693  | 0.000222 | 0.003609 | yes |
| ENSG00000159200 | RCAN1    | 161.447 | 2.204 | 0.148 | 14.910 | 2.86E-50 | 4.96E-47 | yes |
| ENSG00000159579 | RSPRY1   | 75.458  | 0.726 | 0.185 | 3.918  | 8.92E-05 | 0.001702 | yes |
| ENSG00000160199 | PKNOX1   | 30.043  | 0.794 | 0.270 | 2.945  | 0.003226 | 0.031193 | yes |
| ENSG00000160285 | LSS      | 25.347  | 0.721 | 0.244 | 2.950  | 0.003176 | 0.030776 | yes |
| ENSG00000161243 | FBXO27   | 111.710 | 2.256 | 0.289 | 7.798  | 6.29E-15 | 7.77E-13 | yes |
| ENSG00000161671 | EMC10    | 47.481  | 1.051 | 0.302 | 3.487  | 0.000489 | 0.006929 | yes |
| ENSG00000162302 | RPS6KA4  | 29.971  | 1.196 | 0.297 | 4.033  | 5.50E-05 | 0.001115 | yes |
| ENSG00000162366 | PDZK1IP1 | 29.958  | 2.812 | 0.304 | 9.256  | 2.11E-20 | 4.52E-18 | yes |
| ENSG00000162599 | NFIA     | 52.397  | 1.223 | 0.265 | 4.612  | 3.98E-06 | 0.000111 | yes |
| ENSG00000162614 | NEXN     | 25.992  | 0.982 | 0.356 | 2.758  | 0.005822 | 0.049045 | yes |
| ENSG00000162733 | DDR2     | 96.566  | 0.764 | 0.174 | 4.380  | 1.19E-05 | 0.000287 | yes |
| ENSG00000162772 | ATF3     | 50.449  | 1.073 | 0.333 | 3.223  | 0.00127  | 0.01497  | yes |
| ENSG00000163110 | PDLIM5   | 165.656 | 0.773 | 0.115 | 6.725  | 1.76E-11 | 1.50E-09 | yes |
| ENSG00000163249 | CCNYL1   | 55.337  | 0.868 | 0.239 | 3.637  | 0.000275 | 0.004334 | yes |

|                 |          |          |       |       |        |          |          |     |
|-----------------|----------|----------|-------|-------|--------|----------|----------|-----|
| ENSG00000163322 | ABRAXAS1 | 14.582   | 1.313 | 0.407 | 3.228  | 0.001244 | 0.014765 | yes |
| ENSG00000163347 | CLDN1    | 81.998   | 1.824 | 0.182 | 10.029 | 1.14E-23 | 3.17E-21 | yes |
| ENSG00000163359 | COL6A3   | 40.723   | 0.847 | 0.207 | 4.093  | 4.26E-05 | 0.000897 | yes |
| ENSG00000163565 | IFI16    | 45.342   | 1.884 | 0.338 | 5.571  | 2.53E-08 | 1.19E-06 | yes |
| ENSG00000163661 | PTX3     | 49.016   | 3.401 | 0.248 | 13.734 | 6.32E-43 | 4.88E-40 | yes |
| ENSG00000163735 | CXCL5    | 57.101   | 2.909 | 0.221 | 13.181 | 1.12E-39 | 6.77E-37 | yes |
| ENSG00000163738 | MTHFD2L  | 31.123   | 1.132 | 0.261 | 4.343  | 1.40E-05 | 0.000334 | yes |
| ENSG00000163739 | CXCL1    | 39.192   | 3.169 | 0.266 | 11.926 | 8.65E-33 | 4.29E-30 | yes |
| ENSG00000163762 | TM4SF18  | 46.887   | 2.128 | 0.224 | 9.484  | 2.44E-21 | 5.56E-19 | yes |
| ENSG00000163840 | DTX3L    | 118.707  | 0.762 | 0.134 | 5.681  | 1.34E-08 | 6.64E-07 | yes |
| ENSG00000164056 | SPRY1    | 56.897   | 2.246 | 0.251 | 8.964  | 3.14E-19 | 6.23E-17 | yes |
| ENSG00000164430 | CGAS     | 63.913   | 0.930 | 0.221 | 4.197  | 2.70E-05 | 0.000599 | yes |
| ENSG00000164442 | CITED2   | 43.511   | 1.804 | 0.381 | 4.732  | 2.23E-06 | 6.62E-05 | yes |
| ENSG00000164543 | STK17A   | 150.731  | 0.934 | 0.125 | 7.475  | 7.73E-14 | 8.88E-12 | yes |
| ENSG00000164626 | KCNK5    | 25.674   | 0.876 | 0.264 | 3.321  | 0.000897 | 0.01129  | yes |
| ENSG00000164692 | COL1A2   | 39.909   | 1.283 | 0.297 | 4.321  | 1.55E-05 | 0.000364 | yes |
| ENSG00000165030 | NFIL3    | 18.286   | 1.458 | 0.498 | 2.925  | 0.00344  | 0.032918 | yes |
| ENSG00000165102 | HGSNAT   | 33.155   | 0.753 | 0.221 | 3.404  | 0.000665 | 0.008909 | yes |
| ENSG00000165389 | SPTSSA   | 86.954   | 1.013 | 0.233 | 4.355  | 1.33E-05 | 0.000318 | yes |
| ENSG00000165507 | DEPP1    | 13.012   | 2.078 | 0.404 | 5.139  | 2.77E-07 | 1.01E-05 | yes |
| ENSG00000165512 | ZNF22    | 53.863   | 0.767 | 0.198 | 3.869  | 0.000109 | 0.002018 | yes |
| ENSG00000165527 | ARF6     | 204.730  | 0.761 | 0.109 | 7.012  | 2.34E-12 | 2.23E-10 | yes |
| ENSG00000165644 | COMTD1   | 20.239   | 1.019 | 0.344 | 2.959  | 0.003083 | 0.030052 | yes |
| ENSG00000165949 | IFI27    | 12.425   | 2.195 | 0.735 | 2.986  | 0.002822 | 0.02825  | yes |
| ENSG00000165996 | HACD1    | 30.115   | 0.789 | 0.242 | 3.254  | 0.001138 | 0.013675 | yes |
| ENSG00000166326 | TRIM44   | 156.635  | 0.792 | 0.153 | 5.164  | 2.42E-07 | 8.93E-06 | yes |
| ENSG00000166333 | ILK      | 50.123   | 0.757 | 0.219 | 3.462  | 0.000536 | 0.007448 | yes |
| ENSG00000166340 | TPP1     | 99.954   | 1.213 | 0.171 | 7.098  | 1.27E-12 | 1.26E-10 | yes |
| ENSG00000166401 | SERPINB8 | 28.698   | 0.774 | 0.273 | 2.836  | 0.004563 | 0.040918 | yes |
| ENSG00000166432 | ZMAT1    | 25.245   | 0.914 | 0.297 | 3.076  | 0.002101 | 0.022685 | yes |
| ENSG00000166436 | TRIM66   | 19.773   | 1.412 | 0.374 | 3.771  | 0.000162 | 0.002785 | yes |
| ENSG00000166510 | CCDC68   | 45.340   | 1.931 | 0.222 | 8.714  | 2.94E-18 | 5.16E-16 | yes |
| ENSG00000166548 | TK2      | 42.832   | 1.160 | 0.197 | 5.871  | 4.33E-09 | 2.47E-07 | yes |
| ENSG00000166575 | TMEM135  | 24.354   | 0.989 | 0.293 | 3.374  | 0.00074  | 0.009669 | yes |
| ENSG00000166750 | SLFN5    | 65.462   | 1.200 | 0.200 | 5.987  | 2.13E-09 | 1.29E-07 | yes |
| ENSG00000166822 | TMEM170A | 68.053   | 0.779 | 0.185 | 4.211  | 2.54E-05 | 0.000565 | yes |
| ENSG00000166920 | C15orf48 | 52.598   | 3.819 | 0.863 | 4.425  | 9.65E-06 | 0.000241 | yes |
| ENSG00000167601 | AXL      | 245.721  | 1.019 | 0.130 | 7.831  | 4.85E-15 | 6.07E-13 | yes |
| ENSG00000167755 | KLK6     | 47.867   | 0.879 | 0.282 | 3.112  | 0.001858 | 0.020666 | yes |
| ENSG00000167767 | KRT80    | 71.278   | 0.724 | 0.195 | 3.714  | 0.000204 | 0.003361 | yes |
| ENSG00000167772 | ANGPTL4  | 29.969   | 2.170 | 0.296 | 7.328  | 2.34E-13 | 2.54E-11 | yes |
| ENSG00000167972 | ABCA3    | 13.046   | 1.510 | 0.419 | 3.608  | 0.000309 | 0.004804 | yes |
| ENSG00000167996 | FTH1     | 1149.604 | 0.865 | 0.176 | 4.902  | 9.48E-07 | 3.08E-05 | yes |

|                 |          |         |       |       |        |          |          |     |
|-----------------|----------|---------|-------|-------|--------|----------|----------|-----|
| ENSG00000168040 | FADD     | 45.188  | 0.715 | 0.218 | 3.271  | 0.001071 | 0.013095 | yes |
| ENSG00000168283 | BMI1     | 16.117  | 1.971 | 0.530 | 3.721  | 0.000198 | 0.003286 | yes |
| ENSG00000168461 | RAB31    | 170.245 | 0.873 | 0.125 | 7.006  | 2.45E-12 | 2.31E-10 | yes |
| ENSG00000168610 | STAT3    | 219.845 | 0.706 | 0.156 | 4.524  | 6.07E-06 | 0.000161 | yes |
| ENSG00000168876 | ANKRD49  | 40.453  | 0.752 | 0.267 | 2.821  | 0.004792 | 0.042439 | yes |
| ENSG00000169247 | SH3TC2   | 20.910  | 1.339 | 0.297 | 4.503  | 6.71E-06 | 0.000175 | yes |
| ENSG00000169252 | ADRB2    | 18.415  | 3.025 | 1.082 | 2.795  | 0.005188 | 0.045188 | yes |
| ENSG00000169429 | CXCL8    | 28.413  | 3.027 | 0.437 | 6.925  | 4.37E-12 | 3.92E-10 | yes |
| ENSG00000169504 | CLIC4    | 112.584 | 0.844 | 0.186 | 4.547  | 5.45E-06 | 0.000146 | yes |
| ENSG00000169871 | TRIM56   | 68.286  | 0.748 | 0.192 | 3.890  | 0.0001   | 0.001881 | yes |
| ENSG00000169908 | TM4SF1   | 499.184 | 0.804 | 0.090 | 8.934  | 4.10E-19 | 7.84E-17 | yes |
| ENSG00000170035 | UBE2E3   | 82.739  | 1.283 | 0.182 | 7.032  | 2.03E-12 | 1.96E-10 | yes |
| ENSG00000170421 | KRT8     | 371.049 | 0.985 | 0.153 | 6.421  | 1.35E-10 | 1.01E-08 | yes |
| ENSG00000170456 | DENND5B  | 84.317  | 1.010 | 0.179 | 5.627  | 1.83E-08 | 8.92E-07 | yes |
| ENSG00000170485 | NPAS2    | 54.788  | 3.160 | 0.282 | 11.213 | 3.52E-29 | 1.44E-26 | yes |
| ENSG00000170500 | LONRF2   | 34.036  | 0.961 | 0.275 | 3.496  | 0.000472 | 0.006706 | yes |
| ENSG00000170525 | PFKFB3   | 30.251  | 0.957 | 0.266 | 3.602  | 0.000316 | 0.004879 | yes |
| ENSG00000170677 | SOCS6    | 106.887 | 1.106 | 0.158 | 7.012  | 2.35E-12 | 2.23E-10 | yes |
| ENSG00000170689 | HOXB9    | 64.610  | 1.783 | 0.205 | 8.700  | 3.33E-18 | 5.72E-16 | yes |
| ENSG00000170802 | FOXN2    | 47.028  | 0.867 | 0.212 | 4.092  | 4.28E-05 | 0.0009   | yes |
| ENSG00000170955 | CAVIN3   | 26.996  | 1.145 | 0.271 | 4.228  | 2.36E-05 | 0.000529 | yes |
| ENSG00000171316 | CHD7     | 136.525 | 1.106 | 0.155 | 7.115  | 1.12E-12 | 1.14E-10 | yes |
| ENSG00000171365 | CLCN5    | 65.549  | 0.795 | 0.178 | 4.479  | 7.50E-06 | 0.000192 | yes |
| ENSG00000171517 | LPAR3    | 23.627  | 0.825 | 0.279 | 2.959  | 0.003084 | 0.030052 | yes |
| ENSG00000171617 | ENC1     | 94.379  | 0.782 | 0.178 | 4.387  | 1.15E-05 | 0.000279 | yes |
| ENSG00000172059 | KLF11    | 16.531  | 1.527 | 0.519 | 2.942  | 0.003266 | 0.031509 | yes |
| ENSG00000172137 | CALB2    | 70.722  | 2.691 | 0.184 | 14.595 | 3.01E-48 | 3.48E-45 | yes |
| ENSG00000172183 | ISG20    | 22.432  | 0.921 | 0.308 | 2.990  | 0.002789 | 0.027975 | yes |
| ENSG00000172216 | CEBPB    | 103.452 | 1.103 | 0.216 | 5.111  | 3.20E-07 | 1.16E-05 | yes |
| ENSG00000172269 | DPAGT1   | 42.679  | 0.915 | 0.250 | 3.662  | 0.00025  | 0.003976 | yes |
| ENSG00000172432 | GTPBP2   | 22.519  | 1.468 | 0.444 | 3.303  | 0.000957 | 0.011945 | yes |
| ENSG00000173193 | PARP14   | 108.206 | 1.498 | 0.151 | 9.904  | 3.99E-23 | 1.07E-20 | yes |
| ENSG00000173559 | NABP1    | 48.877  | 0.975 | 0.243 | 4.013  | 6.00E-05 | 0.001203 | yes |
| ENSG00000173801 | JUP      | 76.921  | 0.966 | 0.351 | 2.753  | 0.005914 | 0.04945  | yes |
| ENSG00000173848 | NET1     | 106.924 | 0.912 | 0.148 | 6.142  | 8.17E-10 | 5.33E-08 | yes |
| ENSG00000173917 | HOXB2    | 24.613  | 1.322 | 0.377 | 3.509  | 0.00045  | 0.006507 | yes |
| ENSG00000174276 | ZNHIT2   | 12.227  | 1.422 | 0.451 | 3.149  | 0.001639 | 0.018648 | yes |
| ENSG00000174456 | C12orf76 | 12.824  | 1.377 | 0.481 | 2.862  | 0.004208 | 0.038388 | yes |
| ENSG00000174804 | FZD4     | 11.404  | 2.201 | 0.426 | 5.163  | 2.44E-07 | 8.98E-06 | yes |
| ENSG00000175048 | ZDHHC14  | 92.811  | 1.937 | 0.179 | 10.820 | 2.78E-27 | 9.65E-25 | yes |
| ENSG00000175161 | CADM2    | 27.292  | 1.367 | 0.271 | 5.052  | 4.37E-07 | 1.54E-05 | yes |
| ENSG00000175220 | ARHGAP1  | 49.748  | 0.819 | 0.215 | 3.817  | 0.000135 | 0.002408 | yes |
| ENSG00000175224 | ATG13    | 55.017  | 0.754 | 0.195 | 3.859  | 0.000114 | 0.00208  | yes |

|                 |          |         |       |       |        |          |          |     |
|-----------------|----------|---------|-------|-------|--------|----------|----------|-----|
| ENSG00000175471 | MCTP1    | 39.289  | 2.702 | 0.363 | 7.441  | 9.99E-14 | 1.12E-11 | yes |
| ENSG00000175505 | CLCF1    | 24.180  | 1.243 | 0.292 | 4.252  | 2.11E-05 | 0.00048  | yes |
| ENSG00000175745 | NR2F1    | 439.988 | 1.974 | 0.133 | 14.887 | 3.98E-50 | 5.53E-47 | yes |
| ENSG00000177283 | FZD8     | 14.024  | 1.239 | 0.380 | 3.261  | 0.001109 | 0.013373 | yes |
| ENSG00000177606 | JUN      | 442.895 | 1.246 | 0.087 | 14.386 | 6.35E-47 | 5.88E-44 | yes |
| ENSG00000177946 | CENPBD1  | 25.824  | 0.886 | 0.299 | 2.961  | 0.003067 | 0.029924 | yes |
| ENSG00000178202 | POGLUT3  | 35.090  | 1.180 | 0.256 | 4.616  | 3.91E-06 | 0.000109 | yes |
| ENSG00000178397 | FAM220A  | 40.725  | 0.774 | 0.227 | 3.405  | 0.000661 | 0.008861 | yes |
| ENSG00000179431 | FJX1     | 34.552  | 0.800 | 0.262 | 3.050  | 0.002287 | 0.02402  | yes |
| ENSG00000179833 | SERTAD2  | 51.100  | 1.017 | 0.264 | 3.846  | 0.00012  | 0.002173 | yes |
| ENSG00000180263 | FGD6     | 56.912  | 1.607 | 0.230 | 7.000  | 2.56E-12 | 2.41E-10 | yes |
| ENSG00000180537 | RNF182   | 24.381  | 1.778 | 0.313 | 5.674  | 1.40E-08 | 6.91E-07 | yes |
| ENSG00000180914 | OXTR     | 12.378  | 1.824 | 0.474 | 3.848  | 0.000119 | 0.002162 | yes |
| ENSG00000180917 | CMTR2    | 55.187  | 0.816 | 0.187 | 4.367  | 1.26E-05 | 0.000303 | yes |
| ENSG00000181381 | DDX60L   | 45.840  | 1.212 | 0.199 | 6.081  | 1.19E-09 | 7.61E-08 | yes |
| ENSG00000181467 | RAP2B    | 166.948 | 1.856 | 0.169 | 11.003 | 3.70E-28 | 1.39E-25 | yes |
| ENSG00000181649 | PHLDA2   | 293.590 | 1.086 | 0.133 | 8.155  | 3.50E-16 | 4.82E-14 | yes |
| ENSG00000182568 | SATB1    | 14.531  | 0.949 | 0.328 | 2.890  | 0.003858 | 0.036141 | yes |
| ENSG00000182742 | HOXB4    | 44.562  | 1.846 | 0.354 | 5.214  | 1.85E-07 | 7.01E-06 | yes |
| ENSG00000182919 | C11orf54 | 50.427  | 0.788 | 0.225 | 3.505  | 0.000457 | 0.006549 | yes |
| ENSG00000183691 | NOG      | 27.312  | 0.838 | 0.275 | 3.050  | 0.002288 | 0.02402  | yes |
| ENSG00000183765 | CHEK2    | 27.492  | 0.986 | 0.301 | 3.277  | 0.001048 | 0.01286  | yes |
| ENSG00000184584 | STING1   | 14.626  | 1.745 | 0.448 | 3.898  | 9.69E-05 | 0.001824 | yes |
| ENSG00000184743 | ATL3     | 94.323  | 1.116 | 0.204 | 5.460  | 4.77E-08 | 2.08E-06 | yes |
| ENSG00000185112 | FAM43A   | 57.068  | 0.996 | 0.283 | 3.521  | 0.000429 | 0.006283 | yes |
| ENSG00000185306 | C12orf56 | 14.160  | 1.307 | 0.366 | 3.570  | 0.000357 | 0.005418 | yes |
| ENSG00000185745 | IFIT1    | 36.512  | 2.001 | 0.248 | 8.075  | 6.73E-16 | 9.08E-14 | yes |
| ENSG00000185869 | ZNF829   | 10.645  | 2.348 | 0.670 | 3.504  | 0.000458 | 0.006557 | yes |
| ENSG00000186635 | ARAP1    | 28.574  | 0.865 | 0.281 | 3.080  | 0.002069 | 0.022454 | yes |
| ENSG00000187134 | AKR1C1   | 32.519  | 0.822 | 0.276 | 2.976  | 0.002921 | 0.029005 | yes |
| ENSG00000187608 | ISG15    | 103.432 | 1.760 | 0.175 | 10.029 | 1.14E-23 | 3.17E-21 | yes |
| ENSG00000188227 | ZNF793   | 15.157  | 1.440 | 0.380 | 3.784  | 0.000154 | 0.002676 | yes |
| ENSG00000188290 | HES4     | 33.677  | 1.037 | 0.295 | 3.517  | 0.000436 | 0.006358 | yes |
| ENSG00000188313 | PLSCR1   | 42.327  | 1.577 | 0.235 | 6.704  | 2.02E-11 | 1.69E-09 | yes |
| ENSG00000188549 | CCDC9B   | 42.417  | 1.102 | 0.228 | 4.834  | 1.34E-06 | 4.19E-05 | yes |
| ENSG00000189046 | ALKBH2   | 38.540  | 0.787 | 0.264 | 2.978  | 0.002901 | 0.02887  | yes |
| ENSG00000189060 | H1-0     | 103.915 | 0.929 | 0.179 | 5.185  | 2.16E-07 | 8.10E-06 | yes |
| ENSG00000189143 | CLDN4    | 249.231 | 0.792 | 0.143 | 5.530  | 3.21E-08 | 1.45E-06 | yes |
| ENSG00000189223 | PAX8-AS1 | 23.365  | 1.673 | 0.308 | 5.429  | 5.67E-08 | 2.40E-06 | yes |
| ENSG00000196116 | TDRD7    | 10.995  | 1.450 | 0.503 | 2.884  | 0.003932 | 0.036543 | yes |
| ENSG00000196141 | SPATS2L  | 392.103 | 1.651 | 0.110 | 15.000 | 7.37E-51 | 1.46E-47 | yes |
| ENSG00000196182 | STK40    | 54.856  | 0.906 | 0.190 | 4.775  | 1.79E-06 | 5.46E-05 | yes |
| ENSG00000196437 | ZNF569   | 16.428  | 1.203 | 0.414 | 2.903  | 0.003697 | 0.034805 | yes |

|                 |             |         |       |       |        |          |          |     |
|-----------------|-------------|---------|-------|-------|--------|----------|----------|-----|
| ENSG00000196458 | ZNF605      | 33.796  | 0.810 | 0.275 | 2.948  | 0.003199 | 0.030976 | yes |
| ENSG00000196526 | AFAP1       | 79.723  | 1.331 | 0.178 | 7.457  | 8.83E-14 | 9.97E-12 | yes |
| ENSG00000196850 | PPTC7       | 50.740  | 0.900 | 0.240 | 3.748  | 0.000178 | 0.002994 | yes |
| ENSG00000196950 | SLC39A10    | 164.831 | 0.729 | 0.137 | 5.340  | 9.27E-08 | 3.75E-06 | yes |
| ENSG00000197121 | PGAP1       | 33.980  | 2.352 | 0.304 | 7.745  | 9.52E-15 | 1.14E-12 | yes |
| ENSG00000197586 | ENTPD6      | 66.082  | 1.279 | 0.207 | 6.184  | 6.23E-10 | 4.18E-08 | yes |
| ENSG00000197696 | NMB         | 18.861  | 0.958 | 0.287 | 3.334  | 0.000856 | 0.010873 | yes |
| ENSG00000197702 | PARVA       | 38.075  | 0.746 | 0.254 | 2.944  | 0.003245 | 0.031327 | yes |
| ENSG00000197943 | PLCG2       | 13.113  | 1.427 | 0.428 | 3.338  | 0.000842 | 0.010741 | yes |
| ENSG00000198742 | SMURF1      | 46.395  | 1.230 | 0.245 | 5.017  | 5.24E-07 | 1.81E-05 | yes |
| ENSG00000198959 | TGM2        | 180.267 | 1.640 | 0.138 | 11.895 | 1.25E-32 | 6.01E-30 | yes |
| ENSG00000204116 | CHIC1       | 11.528  | 2.546 | 0.810 | 3.145  | 0.001663 | 0.018879 | yes |
| ENSG00000204264 | PSMB8       | 28.371  | 1.594 | 0.397 | 4.017  | 5.89E-05 | 0.001184 | yes |
| ENSG00000205413 | SAMD9       | 74.455  | 2.857 | 0.292 | 9.799  | 1.14E-22 | 2.94E-20 | yes |
| ENSG00000206560 | ANKRD28     | 56.949  | 0.719 | 0.198 | 3.626  | 0.000287 | 0.004496 | yes |
| ENSG00000213186 | TRIM59      | 22.146  | 2.506 | 0.909 | 2.757  | 0.005832 | 0.049045 | yes |
| ENSG00000213465 | ARL2        | 82.328  | 0.921 | 0.171 | 5.374  | 7.70E-08 | 3.17E-06 | yes |
| ENSG00000214900 | LINC01588   | 19.829  | 1.517 | 0.309 | 4.905  | 9.36E-07 | 3.04E-05 | yes |
| ENSG00000215712 | TMEM242     | 14.341  | 1.594 | 0.418 | 3.812  | 0.000138 | 0.002444 | yes |
| ENSG00000215788 | TNFRSF25    | 23.766  | 0.965 | 0.288 | 3.354  | 0.000796 | 0.010287 | yes |
| ENSG00000221869 | CEBPD       | 36.952  | 2.462 | 0.288 | 8.535  | 1.40E-17 | 2.21E-15 | yes |
| ENSG00000221963 | APOL6       | 42.562  | 1.202 | 0.217 | 5.540  | 3.03E-08 | 1.38E-06 | yes |
| ENSG00000224099 | n/a         | 21.881  | 2.072 | 0.398 | 5.200  | 1.99E-07 | 7.49E-06 | yes |
| ENSG00000227036 | LINC00511   | 15.810  | 1.958 | 0.669 | 2.925  | 0.003448 | 0.032966 | yes |
| ENSG00000230453 | ANKRD18B    | 14.998  | 3.373 | 0.484 | 6.970  | 3.16E-12 | 2.93E-10 | yes |
| ENSG00000234608 | MAPKAPK5-A' | 18.717  | 1.047 | 0.349 | 3.001  | 0.002688 | 0.027243 | yes |
| ENSG00000234745 | HLA-B       | 440.335 | 0.780 | 0.145 | 5.369  | 7.91E-08 | 3.25E-06 | yes |
| ENSG00000235884 | LINC00941   | 12.446  | 2.022 | 0.505 | 4.002  | 6.28E-05 | 0.001248 | yes |
| ENSG00000237187 | NR2F1-AS1   | 24.194  | 1.912 | 0.331 | 5.782  | 7.39E-09 | 4.00E-07 | yes |
| ENSG00000240694 | PNMA2       | 22.303  | 1.274 | 0.357 | 3.566  | 0.000363 | 0.005502 | yes |
| ENSG00000241685 | ARPC1A      | 87.544  | 0.837 | 0.175 | 4.769  | 1.85E-06 | 5.61E-05 | yes |
| ENSG00000242498 | ARPIN       | 12.085  | 1.617 | 0.481 | 3.363  | 0.00077  | 0.009986 | yes |
| ENSG00000245694 | CRNDE       | 33.369  | 0.795 | 0.279 | 2.854  | 0.004316 | 0.039167 | yes |
| ENSG00000249992 | TMEM158     | 79.393  | 0.702 | 0.210 | 3.345  | 0.000824 | 0.010557 | yes |
| ENSG00000250072 | SH3TC2-DT   | 61.923  | 1.424 | 0.177 | 8.028  | 9.87E-16 | 1.31E-13 | yes |
| ENSG00000251194 | n/a         | 11.750  | 1.009 | 0.361 | 2.794  | 0.005211 | 0.04528  | yes |
| ENSG00000257178 | n/a         | 19.223  | 1.698 | 0.447 | 3.801  | 0.000144 | 0.002538 | yes |
| ENSG00000258655 | ARHGAP5-AS1 | 11.456  | 2.814 | 0.505 | 5.568  | 2.58E-08 | 1.21E-06 | yes |
| ENSG00000260549 | MT1L        | 70.222  | 1.577 | 0.339 | 4.646  | 3.38E-06 | 9.57E-05 | yes |
| ENSG00000263465 | SRSF8       | 41.357  | 0.782 | 0.254 | 3.081  | 0.00206  | 0.022413 | yes |
| ENSG00000271503 | CCL5        | 10.729  | 3.058 | 0.487 | 6.277  | 3.45E-10 | 2.45E-08 | yes |
| ENSG00000272763 | n/a         | 20.300  | 2.911 | 0.654 | 4.454  | 8.41E-06 | 0.000213 | yes |
| ENSG00000275342 | PRAG1       | 27.782  | 1.732 | 0.356 | 4.866  | 1.14E-06 | 3.64E-05 | yes |

|                  |          |         |        |       |         |          |          |     |
|------------------|----------|---------|--------|-------|---------|----------|----------|-----|
| ENSG00000280138  | n/a      | 13.370  | 1.477  | 0.529 | 2.791   | 0.005253 | 0.045435 | yes |
| ENSG00000000460  | C1orf112 | 17.316  | -0.717 | 0.341 | -2.103  | 0.035505 | 0.177567 | yes |
| ENSG000000003096 | KLHL13   | 10.017  | -0.876 | 0.498 | -1.758  | 0.078691 | 0.294778 | yes |
| ENSG000000005513 | SOX8     | 18.266  | -1.118 | 0.302 | -3.700  | 0.000216 | 0.003527 | yes |
| ENSG000000005882 | PDK2     | 15.652  | -0.742 | 0.531 | -1.398  | 0.162139 | 0.446761 | yes |
| ENSG000000006016 | CRLF1    | 36.219  | -1.590 | 0.293 | -5.436  | 5.45E-08 | 2.32E-06 | yes |
| ENSG000000011028 | MRC2     | 40.155  | -0.739 | 0.216 | -3.418  | 0.000631 | 0.008517 | yes |
| ENSG000000011332 | DPF1     | 13.729  | -0.881 | 0.355 | -2.479  | 0.013167 | 0.088461 | yes |
| ENSG000000013810 | TACC3    | 177.724 | -0.880 | 0.129 | -6.812  | 9.63E-12 | 8.31E-10 | yes |
| ENSG000000014914 | MTMR11   | 13.052  | -0.914 | 0.382 | -2.390  | 0.016853 | 0.105573 | yes |
| ENSG000000022567 | SLC45A4  | 19.245  | -0.901 | 0.355 | -2.540  | 0.011086 | 0.07815  | yes |
| ENSG000000023171 | GRAMD1B  | 25.689  | -1.605 | 0.253 | -6.345  | 2.22E-10 | 1.62E-08 | yes |
| ENSG000000024526 | DEPDC1   | 91.189  | -0.978 | 0.172 | -5.684  | 1.32E-08 | 6.57E-07 | yes |
| ENSG000000025770 | NCAPH2   | 26.115  | -0.749 | 0.289 | -2.589  | 0.009633 | 0.070552 | yes |
| ENSG000000027001 | MIPEP    | 11.781  | -1.080 | 0.363 | -2.975  | 0.002926 | 0.029019 | yes |
| ENSG000000032742 | IFT88    | 36.233  | -1.094 | 0.236 | -4.629  | 3.67E-06 | 0.000103 | yes |
| ENSG000000035499 | DEPDC1B  | 52.979  | -0.932 | 0.234 | -3.974  | 7.05E-05 | 0.001386 | yes |
| ENSG000000037965 | HOXC8    | 26.348  | -0.808 | 0.315 | -2.562  | 0.010406 | 0.074643 | yes |
| ENSG000000039123 | MTREX    | 315.616 | -0.714 | 0.138 | -5.178  | 2.25E-07 | 8.42E-06 | yes |
| ENSG000000040275 | SPDL1    | 216.233 | -0.808 | 0.133 | -6.077  | 1.22E-09 | 7.77E-08 | yes |
| ENSG000000040608 | RTN4R    | 19.390  | -0.832 | 0.317 | -2.627  | 0.00862  | 0.064881 | yes |
| ENSG000000046604 | DSG2     | 80.315  | -0.951 | 0.192 | -4.951  | 7.39E-07 | 2.50E-05 | yes |
| ENSG000000047365 | ARAP2    | 26.135  | -1.531 | 1.675 | -0.914  | 0.360606 | 0.672246 | yes |
| ENSG000000047634 | SCML1    | 10.349  | -1.594 | 1.058 | -1.507  | 0.131905 | 0.400589 | yes |
| ENSG000000052126 | PLEKHA5  | 42.674  | -0.779 | 0.253 | -3.077  | 0.002088 | 0.022615 | yes |
| ENSG000000054277 | OPN3     | 19.376  | -0.790 | 0.391 | -2.017  | 0.043677 | 0.204328 | yes |
| ENSG000000055163 | CYFIP2   | 12.939  | -0.946 | 0.352 | -2.688  | 0.007193 | 0.056879 | yes |
| ENSG000000058085 | LAMC2    | 35.005  | -1.910 | 1.220 | -1.566  | 0.117315 | 0.374964 | yes |
| ENSG000000058091 | CDK14    | 10.484  | -2.309 | 0.875 | -2.638  | 0.00834  | 0.063336 | yes |
| ENSG000000062038 | CDH3     | 16.660  | -1.914 | 1.236 | -1.549  | 0.121471 | 0.382701 | yes |
| ENSG000000064666 | CNN2     | 148.689 | -0.970 | 0.140 | -6.939  | 3.96E-12 | 3.57E-10 | yes |
| ENSG000000065361 | ERBB3    | 16.914  | -1.121 | 0.419 | -2.676  | 0.007458 | 0.058377 | yes |
| ENSG000000065717 | TLE2     | 39.585  | -0.782 | 0.239 | -3.274  | 0.001062 | 0.013013 | yes |
| ENSG000000065989 | PDE4A    | 17.122  | -1.957 | 0.443 | -4.419  | 9.92E-06 | 0.000246 | yes |
| ENSG000000066583 | ISOC1    | 27.047  | -0.949 | 0.349 | -2.720  | 0.006523 | 0.053371 | yes |
| ENSG000000066629 | EML1     | 11.549  | -0.851 | 0.383 | -2.222  | 0.026252 | 0.145087 | yes |
| ENSG000000067798 | NAV3     | 25.808  | -1.613 | 0.318 | -5.078  | 3.82E-07 | 1.36E-05 | yes |
| ENSG000000068489 | PRR11    | 301.358 | -0.724 | 0.129 | -5.619  | 1.92E-08 | 9.26E-07 | yes |
| ENSG000000070814 | TCOF1    | 240.185 | -0.858 | 0.103 | -8.345  | 7.13E-17 | 1.05E-14 | yes |
| ENSG000000072571 | HMMR     | 255.950 | -0.982 | 0.091 | -10.736 | 6.87E-27 | 2.33E-24 | yes |
| ENSG000000072682 | P4HA2    | 39.119  | -0.838 | 0.216 | -3.885  | 0.000102 | 0.001909 | yes |
| ENSG000000073050 | XRCC1    | 27.342  | -0.723 | 0.274 | -2.644  | 0.008191 | 0.062551 | yes |
| ENSG000000074211 | PPP2R2C  | 45.950  | -1.160 | 0.202 | -5.740  | 9.46E-09 | 4.89E-07 | yes |



|                 |          |          |        |       |         |          |          |     |
|-----------------|----------|----------|--------|-------|---------|----------|----------|-----|
| ENSG00000074416 | MGLL     | 39.075   | -0.908 | 0.977 | -0.929  | 0.352876 | 0.664523 | yes |
| ENSG00000074855 | ANO8     | 21.505   | -0.707 | 0.292 | -2.417  | 0.015654 | 0.100366 | yes |
| ENSG00000075218 | GTSE1    | 76.992   | -0.743 | 0.172 | -4.323  | 1.54E-05 | 0.000363 | yes |
| ENSG00000075391 | RASAL2   | 115.531  | -1.614 | 0.160 | -10.064 | 7.95E-24 | 2.30E-21 | yes |
| ENSG00000075461 | CACNG4   | 16.713   | -2.081 | 0.396 | -5.251  | 1.51E-07 | 5.85E-06 | yes |
| ENSG00000075702 | WDR62    | 18.573   | -0.866 | 0.362 | -2.392  | 0.016753 | 0.105135 | yes |
| ENSG00000076382 | SPAG5    | 53.531   | -0.750 | 0.196 | -3.819  | 0.000134 | 0.002387 | yes |
| ENSG00000076662 | ICAM3    | 11.392   | -1.500 | 0.462 | -3.247  | 0.001166 | 0.013966 | yes |
| ENSG00000077152 | UBE2T    | 51.482   | -0.769 | 0.266 | -2.885  | 0.003918 | 0.03651  | yes |
| ENSG00000077782 | FGFR1    | 75.197   | -0.846 | 0.155 | -5.473  | 4.42E-08 | 1.93E-06 | yes |
| ENSG00000078401 | EDN1     | 31.992   | -0.868 | 0.545 | -1.593  | 0.111179 | 0.362999 | yes |
| ENSG00000079257 | LXN      | 11.520   | -1.757 | 0.911 | -1.929  | 0.053705 | 0.2326   | yes |
| ENSG00000079616 | KIF22    | 91.445   | -0.934 | 0.168 | -5.553  | 2.81E-08 | 1.29E-06 | yes |
| ENSG00000080824 | HSP90AA1 | 5750.170 | -0.703 | 0.064 | -10.976 | 5.01E-28 | 1.78E-25 | yes |
| ENSG00000082516 | GEMIN5   | 131.756  | -0.757 | 0.110 | -6.866  | 6.62E-12 | 5.86E-10 | yes |
| ENSG00000083838 | ZNF446   | 11.585   | -0.980 | 0.434 | -2.261  | 0.023782 | 0.13503  | yes |
| ENSG00000085662 | AKR1B1   | 93.028   | -0.884 | 0.144 | -6.136  | 8.49E-10 | 5.51E-08 | yes |
| ENSG00000085872 | CHERP    | 80.801   | -0.738 | 0.160 | -4.603  | 4.17E-06 | 0.000115 | yes |
| ENSG00000086200 | IPO11    | 36.663   | -0.797 | 0.227 | -3.512  | 0.000445 | 0.006465 | yes |
| ENSG00000087253 | LPCAT2   | 25.343   | -2.750 | 1.139 | -2.414  | 0.01576  | 0.10086  | yes |
| ENSG00000087510 | TFAP2C   | 13.644   | -0.799 | 0.515 | -1.553  | 0.120519 | 0.381101 | yes |
| ENSG00000087586 | AURKA    | 238.063  | -0.740 | 0.109 | -6.795  | 1.08E-11 | 9.29E-10 | yes |
| ENSG00000088305 | DNMT3B   | 10.958   | -1.483 | 0.390 | -3.802  | 0.000144 | 0.002531 | yes |
| ENSG00000088992 | TESC     | 10.676   | -1.629 | 0.409 | -3.983  | 6.80E-05 | 0.001338 | yes |
| ENSG00000089820 | ARHGAP4  | 20.853   | -0.914 | 0.983 | -0.930  | 0.35249  | 0.664327 | yes |
| ENSG00000090776 | EFNB1    | 11.299   | -0.958 | 0.385 | -2.488  | 0.012852 | 0.087102 | yes |
| ENSG00000090889 | KIF4A    | 208.039  | -0.716 | 0.111 | -6.441  | 1.18E-10 | 8.90E-09 | yes |
| ENSG00000090932 | DLL3     | 104.509  | -0.793 | 0.399 | -1.988  | 0.046761 | 0.213017 | yes |
| ENSG00000092853 | CLSPN    | 141.170  | -0.730 | 0.148 | -4.919  | 8.70E-07 | 2.86E-05 | yes |
| ENSG00000094804 | CDC6     | 77.746   | -0.715 | 0.166 | -4.294  | 1.75E-05 | 0.000406 | yes |
| ENSG00000094914 | AAAS     | 30.350   | -0.737 | 0.284 | -2.598  | 0.009373 | 0.069383 | yes |
| ENSG00000096092 | TMEM14A  | 47.522   | -0.801 | 0.250 | -3.202  | 0.001366 | 0.015925 | yes |
| ENSG00000100092 | SH3BP1   | 18.062   | -1.059 | 0.322 | -3.285  | 0.00102  | 0.012581 | yes |
| ENSG00000100116 | GCAT     | 14.035   | -0.919 | 0.347 | -2.650  | 0.008039 | 0.06178  | yes |
| ENSG00000100292 | HMOX1    | 24.568   | -0.777 | 0.319 | -2.435  | 0.014899 | 0.096881 | yes |
| ENSG00000100359 | SGSM3    | 18.541   | -0.749 | 0.359 | -2.084  | 0.037136 | 0.183164 | yes |
| ENSG00000100558 | PLEK2    | 23.392   | -0.989 | 1.121 | -0.882  | 0.377515 | 0.68368  | yes |
| ENSG00000100577 | GSTZ1    | 18.356   | -1.404 | 0.372 | -3.773  | 0.000161 | 0.002769 | yes |
| ENSG00000101098 | RIMS4    | 20.572   | -0.911 | 0.306 | -2.972  | 0.002958 | 0.029235 | yes |
| ENSG00000101333 | PLCB4    | 88.337   | -1.907 | 1.213 | -1.573  | 0.115809 | 0.371778 | yes |
| ENSG00000101335 | MYL9     | 85.051   | -1.056 | 0.160 | -6.598  | 4.18E-11 | 3.32E-09 | yes |
| ENSG00000102078 | SLC25A14 | 16.903   | -0.755 | 0.325 | -2.326  | 0.020012 | 0.119896 | yes |
| ENSG00000102543 | CDADC1   | 14.256   | -0.751 | 0.354 | -2.118  | 0.034185 | 0.173917 | yes |

|                 |          |         |        |       |        |          |          |     |
|-----------------|----------|---------|--------|-------|--------|----------|----------|-----|
| ENSG00000102554 | KLF5     | 20.944  | -0.888 | 0.497 | -1.787 | 0.073865 | 0.283869 | yes |
| ENSG00000103260 | METRN    | 44.496  | -1.037 | 0.322 | -3.218 | 0.001291 | 0.01517  | yes |
| ENSG00000103540 | CCP110   | 82.302  | -0.729 | 0.177 | -4.122 | 3.76E-05 | 0.000801 | yes |
| ENSG00000103653 | CSK      | 24.531  | -1.049 | 0.274 | -3.824 | 0.000131 | 0.00235  | yes |
| ENSG00000103876 | FAH      | 16.418  | -0.946 | 0.304 | -3.108 | 0.001882 | 0.02087  | yes |
| ENSG00000104147 | OIP5     | 32.791  | -0.704 | 0.305 | -2.311 | 0.020836 | 0.123135 | yes |
| ENSG00000104369 | JPH1     | 14.344  | -1.065 | 0.590 | -1.804 | 0.07117  | 0.277061 | yes |
| ENSG00000104611 | SH2D4A   | 22.176  | -1.178 | 1.327 | -0.887 | 0.374892 | 0.682607 | yes |
| ENSG00000104738 | MCM4     | 265.707 | -0.838 | 0.126 | -6.635 | 3.24E-11 | 2.62E-09 | yes |
| ENSG00000104763 | ASAH1    | 21.866  | -0.772 | 0.324 | -2.384 | 0.017146 | 0.106973 | yes |
| ENSG00000104853 | CLPTM1   | 48.791  | -0.799 | 0.280 | -2.850 | 0.004375 | 0.03963  | yes |
| ENSG00000104889 | RNASEH2A | 59.822  | -0.788 | 0.189 | -4.161 | 3.17E-05 | 0.000691 | yes |
| ENSG00000104967 | NOVA2    | 16.460  | -0.711 | 0.327 | -2.170 | 0.02998  | 0.158742 | yes |
| ENSG00000105011 | ASF1B    | 61.695  | -0.707 | 0.219 | -3.228 | 0.001247 | 0.014771 | yes |
| ENSG00000105048 | TNNT1    | 190.949 | -0.700 | 0.122 | -5.719 | 1.07E-08 | 5.48E-07 | yes |
| ENSG00000105290 | APLP1    | 19.012  | -0.718 | 0.341 | -2.108 | 0.034996 | 0.176171 | yes |
| ENSG00000105419 | MEIS3    | 31.176  | -1.047 | 0.210 | -4.976 | 6.48E-07 | 2.21E-05 | yes |
| ENSG00000105486 | LIG1     | 36.635  | -0.862 | 0.261 | -3.304 | 0.000952 | 0.011908 | yes |
| ENSG00000105516 | DBP      | 25.735  | -0.866 | 0.318 | -2.726 | 0.006411 | 0.052668 | yes |
| ENSG00000105520 | PLPPR2   | 17.950  | -1.296 | 0.366 | -3.536 | 0.000406 | 0.006028 | yes |
| ENSG00000105605 | CACNG7   | 19.515  | -2.083 | 0.372 | -5.595 | 2.21E-08 | 1.05E-06 | yes |
| ENSG00000105662 | CRTC1    | 11.701  | -0.705 | 0.389 | -1.814 | 0.069664 | 0.273888 | yes |
| ENSG00000105696 | TMEM59L  | 20.464  | -1.213 | 0.287 | -4.233 | 2.31E-05 | 0.000519 | yes |
| ENSG00000105722 | ERF      | 58.182  | -0.856 | 0.307 | -2.784 | 0.005363 | 0.046048 | yes |
| ENSG00000106484 | MEST     | 13.910  | -1.330 | 0.794 | -1.674 | 0.094043 | 0.327805 | yes |
| ENSG00000106546 | AHR      | 34.028  | -2.497 | 0.379 | -6.590 | 4.41E-11 | 3.47E-09 | yes |
| ENSG00000107331 | ABCA2    | 14.591  | -0.798 | 0.366 | -2.180 | 0.029265 | 0.156342 | yes |
| ENSG00000107738 | VSIR     | 13.400  | -0.952 | 0.364 | -2.615 | 0.008911 | 0.066602 | yes |
| ENSG00000107821 | KAZALD1  | 10.252  | -1.448 | 0.502 | -2.884 | 0.003923 | 0.036513 | yes |
| ENSG00000108813 | DLX4     | 10.558  | -0.730 | 0.376 | -1.944 | 0.051867 | 0.227834 | yes |
| ENSG00000108852 | MPP2     | 16.627  | -1.472 | 0.340 | -4.324 | 1.53E-05 | 0.000362 | yes |
| ENSG00000109016 | DHRS7B   | 13.020  | -0.851 | 0.396 | -2.146 | 0.031901 | 0.16663  | yes |
| ENSG00000109321 | AREG     | 454.603 | -1.048 | 0.110 | -9.538 | 1.45E-21 | 3.37E-19 | yes |
| ENSG00000109466 | KLHL2    | 12.159  | -0.952 | 0.580 | -1.640 | 0.101021 | 0.342817 | yes |
| ENSG00000109501 | WFS1     | 14.028  | -1.130 | 0.387 | -2.922 | 0.003482 | 0.033203 | yes |
| ENSG00000110723 | EXPH5    | 26.007  | -0.951 | 0.545 | -1.743 | 0.08128  | 0.299473 | yes |
| ENSG00000111907 | TPD52L1  | 12.488  | -0.932 | 0.533 | -1.749 | 0.08037  | 0.297934 | yes |
| ENSG00000112576 | CCND3    | 31.706  | -0.917 | 0.265 | -3.462 | 0.000537 | 0.00745  | yes |
| ENSG00000112742 | TTK      | 86.223  | -0.970 | 0.178 | -5.445 | 5.18E-08 | 2.22E-06 | yes |
| ENSG00000112984 | KIF20A   | 59.365  | -1.200 | 0.204 | -5.892 | 3.81E-09 | 2.20E-07 | yes |
| ENSG00000113580 | NR3C1    | 134.069 | -0.829 | 0.144 | -5.748 | 9.04E-09 | 4.74E-07 | yes |
| ENSG00000113645 | WWC1     | 88.862  | -0.751 | 0.204 | -3.689 | 0.000225 | 0.003658 | yes |
| ENSG00000114405 | C3orf14  | 12.508  | -2.029 | 1.466 | -1.384 | 0.16631  | 0.453477 | yes |

|                 |         |          |        |       |         |          |          |     |
|-----------------|---------|----------|--------|-------|---------|----------|----------|-----|
| ENSG00000115289 | PCGF1   | 10.325   | -0.900 | 0.527 | -1.707  | 0.087841 | 0.314227 | yes |
| ENSG00000115738 | ID2     | 44.003   | -1.171 | 0.266 | -4.400  | 1.08E-05 | 0.000266 | yes |
| ENSG00000115828 | QPCT    | 14.060   | -1.316 | 0.362 | -3.636  | 0.000277 | 0.004354 | yes |
| ENSG00000116191 | RALGPS2 | 52.993   | -0.827 | 0.227 | -3.643  | 0.00027  | 0.004254 | yes |
| ENSG00000116729 | WLS     | 26.711   | -1.162 | 0.301 | -3.861  | 0.000113 | 0.002071 | yes |
| ENSG00000116962 | NID1    | 43.832   | -1.228 | 0.636 | -1.931  | 0.053531 | 0.232207 | yes |
| ENSG00000117115 | PADI2   | 43.220   | -1.454 | 1.565 | -0.929  | 0.35286  | 0.664523 | yes |
| ENSG00000117399 | CDC20   | 204.479  | -0.800 | 0.112 | -7.133  | 9.81E-13 | 1.01E-10 | yes |
| ENSG00000117586 | TNFSF4  | 15.978   | -1.499 | 0.417 | -3.591  | 0.00033  | 0.005046 | yes |
| ENSG00000117592 | PRDX6   | 357.748  | -0.951 | 0.079 | -12.012 | 3.08E-33 | 1.58E-30 | yes |
| ENSG00000117650 | NEK2    | 85.914   | -1.294 | 0.171 | -7.588  | 3.24E-14 | 3.82E-12 | yes |
| ENSG00000117724 | CENPF   | 1443.623 | -0.912 | 0.064 | -14.259 | 3.94E-46 | 3.43E-43 | yes |
| ENSG00000118193 | KIF14   | 153.807  | -0.710 | 0.128 | -5.561  | 2.68E-08 | 1.24E-06 | yes |
| ENSG00000119782 | FKBP1B  | 10.765   | -1.737 | 0.515 | -3.374  | 0.000741 | 0.009681 | yes |
| ENSG00000120334 | CENPL   | 34.968   | -0.971 | 0.254 | -3.823  | 0.000132 | 0.002356 | yes |
| ENSG00000120694 | HSPH1   | 865.135  | -0.808 | 0.102 | -7.888  | 3.07E-15 | 3.91E-13 | yes |
| ENSG00000120885 | CLU     | 188.876  | -0.703 | 0.139 | -5.060  | 4.20E-07 | 1.48E-05 | yes |
| ENSG00000120913 | PDLIM2  | 84.276   | -0.808 | 0.262 | -3.083  | 0.002052 | 0.022339 | yes |
| ENSG00000121152 | NCAPH   | 73.047   | -0.960 | 0.194 | -4.943  | 7.68E-07 | 2.58E-05 | yes |
| ENSG00000121211 | MND1    | 38.411   | -0.824 | 0.233 | -3.540  | 0.000401 | 0.005995 | yes |
| ENSG00000122335 | SERAC1  | 11.986   | -0.868 | 0.403 | -2.157  | 0.031025 | 0.163097 | yes |
| ENSG00000122952 | ZWINT   | 55.869   | -0.812 | 0.191 | -4.247  | 2.17E-05 | 0.000491 | yes |
| ENSG00000123297 | TSFM    | 28.171   | -0.706 | 0.271 | -2.604  | 0.009216 | 0.068367 | yes |
| ENSG00000123485 | HJURP   | 173.850  | -0.790 | 0.118 | -6.705  | 2.02E-11 | 1.69E-09 | yes |
| ENSG00000124191 | TOX2    | 54.233   | -0.876 | 0.339 | -2.586  | 0.009697 | 0.070762 | yes |
| ENSG00000124313 | IQSEC2  | 10.075   | -0.723 | 0.443 | -1.633  | 0.102517 | 0.345727 | yes |
| ENSG00000125144 | MT1G    | 15.969   | -3.201 | 0.606 | -5.278  | 1.31E-07 | 5.12E-06 | yes |
| ENSG00000126822 | PLEKHG3 | 31.102   | -0.924 | 0.321 | -2.877  | 0.004019 | 0.037128 | yes |
| ENSG00000127220 | ABHD8   | 10.510   | -0.766 | 0.439 | -1.746  | 0.080809 | 0.298925 | yes |
| ENSG00000127399 | LRRC61  | 17.119   | -2.419 | 1.569 | -1.542  | 0.123084 | 0.385599 | yes |
| ENSG00000127564 | PKMYT1  | 49.425   | -0.727 | 0.207 | -3.504  | 0.000459 | 0.00657  | yes |
| ENSG00000127586 | CHTF18  | 17.880   | -0.759 | 0.341 | -2.228  | 0.025897 | 0.143807 | yes |
| ENSG00000128581 | IFT22   | 37.694   | -0.835 | 0.227 | -3.682  | 0.000232 | 0.003735 | yes |
| ENSG00000128708 | HAT1    | 62.487   | -0.796 | 0.204 | -3.912  | 9.15E-05 | 0.001737 | yes |
| ENSG00000129354 | AP1M2   | 18.392   | -1.170 | 1.331 | -0.879  | 0.379475 | 0.68573  | yes |
| ENSG00000130600 | H19     | 277.993  | -1.453 | 0.246 | -5.900  | 3.63E-09 | 2.12E-07 | yes |
| ENSG00000131188 | PRR7    | 17.222   | -0.902 | 0.348 | -2.588  | 0.00966  | 0.070677 | yes |
| ENSG00000131495 | NDUFA2  | 138.899  | -0.734 | 0.127 | -5.790  | 7.05E-09 | 3.84E-07 | yes |
| ENSG00000131747 | TOP2A   | 2194.679 | -0.910 | 0.091 | -9.973  | 2.00E-23 | 5.44E-21 | yes |
| ENSG00000132122 | SPATA6  | 12.746   | -1.574 | 0.384 | -4.103  | 4.07E-05 | 0.00086  | yes |
| ENSG00000132326 | PER2    | 24.147   | -0.720 | 0.327 | -2.203  | 0.027613 | 0.149965 | yes |
| ENSG00000132563 | REEP2   | 19.295   | -0.731 | 0.284 | -2.570  | 0.010161 | 0.073415 | yes |
| ENSG00000132879 | FBXO44  | 31.521   | -0.821 | 0.246 | -3.338  | 0.000843 | 0.010741 | yes |

|                 |         |         |        |       |         |          |          |     |
|-----------------|---------|---------|--------|-------|---------|----------|----------|-----|
| ENSG00000133119 | RFC3    | 119.447 | -0.800 | 0.132 | -6.071  | 1.27E-09 | 8.00E-08 | yes |
| ENSG00000133131 | MORC4   | 56.898  | -0.858 | 0.202 | -4.254  | 2.10E-05 | 0.000477 | yes |
| ENSG00000133134 | BEX2    | 38.878  | -1.101 | 0.270 | -4.075  | 4.60E-05 | 0.00095  | yes |
| ENSG00000133265 | HSPBP1  | 51.251  | -0.807 | 0.246 | -3.282  | 0.001031 | 0.012693 | yes |
| ENSG00000134057 | CCNB1   | 391.313 | -0.841 | 0.094 | -8.938  | 3.95E-19 | 7.73E-17 | yes |
| ENSG00000134138 | MEIS2   | 57.569  | -1.471 | 0.219 | -6.705  | 2.02E-11 | 1.69E-09 | yes |
| ENSG00000134146 | DPH6    | 49.999  | -1.552 | 0.207 | -7.482  | 7.30E-14 | 8.45E-12 | yes |
| ENSG00000134668 | SPOCD1  | 36.352  | -1.097 | 0.194 | -5.668  | 1.44E-08 | 7.11E-07 | yes |
| ENSG00000134709 | HOOK1   | 18.913  | -1.531 | 1.676 | -0.914  | 0.360934 | 0.672589 | yes |
| ENSG00000134755 | DSC2    | 18.487  | -1.392 | 0.678 | -2.053  | 0.040028 | 0.192105 | yes |
| ENSG00000135083 | CCNJL   | 15.053  | -1.329 | 0.775 | -1.714  | 0.086511 | 0.311879 | yes |
| ENSG00000135272 | MDFIC   | 19.135  | -0.997 | 0.322 | -3.097  | 0.001958 | 0.021453 | yes |
| ENSG00000135525 | MAP7    | 20.347  | -1.424 | 0.414 | -3.438  | 0.000585 | 0.008042 | yes |
| ENSG00000135596 | MICAL1  | 18.664  | -0.743 | 0.300 | -2.478  | 0.013207 | 0.088627 | yes |
| ENSG00000135723 | FHOD1   | 31.429  | -1.115 | 0.236 | -4.725  | 2.30E-06 | 6.78E-05 | yes |
| ENSG00000135749 | PCNX2   | 18.500  | -1.441 | 0.319 | -4.512  | 6.41E-06 | 0.000168 | yes |
| ENSG00000136108 | CKAP2   | 229.587 | -0.833 | 0.113 | -7.373  | 1.67E-13 | 1.82E-11 | yes |
| ENSG00000136542 | GALNT5  | 11.747  | -1.531 | 1.681 | -0.911  | 0.362443 | 0.673773 | yes |
| ENSG00000136928 | GABBR2  | 11.517  | -2.255 | 0.526 | -4.287  | 1.81E-05 | 0.000417 | yes |
| ENSG00000136982 | DSCC1   | 22.049  | -0.925 | 0.361 | -2.562  | 0.010405 | 0.074643 | yes |
| ENSG00000137812 | KNL1    | 117.039 | -0.765 | 0.149 | -5.142  | 2.72E-07 | 9.94E-06 | yes |
| ENSG00000137868 | STRA6   | 25.027  | -1.139 | 0.281 | -4.052  | 5.09E-05 | 0.001044 | yes |
| ENSG00000137941 | TTL7    | 22.932  | -0.781 | 0.409 | -1.909  | 0.056278 | 0.239926 | yes |
| ENSG00000138061 | CYP1B1  | 73.894  | -0.731 | 0.262 | -2.792  | 0.005244 | 0.045424 | yes |
| ENSG00000138347 | MYPN    | 75.149  | -0.852 | 0.148 | -5.764  | 8.19E-09 | 4.33E-07 | yes |
| ENSG00000138495 | COX17   | 98.070  | -0.785 | 0.229 | -3.426  | 0.000613 | 0.008335 | yes |
| ENSG00000138735 | PDE5A   | 22.276  | -3.325 | 0.654 | -5.087  | 3.65E-07 | 1.30E-05 | yes |
| ENSG00000138764 | CCNG2   | 13.142  | -1.077 | 0.378 | -2.851  | 0.004357 | 0.039518 | yes |
| ENSG00000139266 | MARCHF9 | 10.080  | -0.712 | 0.431 | -1.651  | 0.098658 | 0.337792 | yes |
| ENSG00000139291 | TMEM19  | 22.814  | -0.756 | 0.441 | -1.715  | 0.086268 | 0.311489 | yes |
| ENSG00000139318 | DUSP6   | 145.802 | -1.656 | 0.137 | -12.073 | 1.48E-33 | 7.88E-31 | yes |
| ENSG00000139970 | RTN1    | 14.042  | -0.765 | 0.437 | -1.752  | 0.079695 | 0.296539 | yes |
| ENSG00000139998 | RAB15   | 12.410  | -0.935 | 0.360 | -2.597  | 0.009414 | 0.069464 | yes |
| ENSG00000140511 | HAPLN3  | 13.347  | -2.173 | 1.202 | -1.808  | 0.07061  | 0.276259 | yes |
| ENSG00000140525 | FANCI   | 60.134  | -1.021 | 0.201 | -5.088  | 3.61E-07 | 1.29E-05 | yes |
| ENSG00000140545 | MFGE8   | 192.956 | -0.717 | 0.242 | -2.967  | 0.003012 | 0.029554 | yes |
| ENSG00000141404 | GNAL    | 22.467  | -0.908 | 0.289 | -3.140  | 0.00169  | 0.01911  | yes |
| ENSG00000142875 | PRKACB  | 47.738  | -1.598 | 0.288 | -5.557  | 2.75E-08 | 1.26E-06 | yes |
| ENSG00000143228 | NUF2    | 164.063 | -0.884 | 0.121 | -7.321  | 2.47E-13 | 2.66E-11 | yes |
| ENSG00000143315 | PIGM    | 54.328  | -0.745 | 0.194 | -3.841  | 0.000123 | 0.002213 | yes |
| ENSG00000143320 | CRABP2  | 78.103  | -0.913 | 0.980 | -0.932  | 0.351374 | 0.663237 | yes |
| ENSG00000143363 | PRUNE1  | 18.903  | -0.833 | 0.353 | -2.361  | 0.01824  | 0.111988 | yes |
| ENSG00000143375 | CGN     | 33.657  | -1.806 | 1.005 | -1.798  | 0.072129 | 0.279075 | yes |

|                 |          |         |        |       |        |          |          |     |
|-----------------|----------|---------|--------|-------|--------|----------|----------|-----|
| ENSG00000143393 | PI4KB    | 33.676  | -0.848 | 0.232 | -3.656 | 0.000257 | 0.004065 | yes |
| ENSG00000143476 | DTL      | 84.056  | -0.912 | 0.160 | -5.699 | 1.20E-08 | 6.11E-07 | yes |
| ENSG00000143537 | ADAM15   | 109.083 | -1.074 | 0.259 | -4.141 | 3.45E-05 | 0.000746 | yes |
| ENSG00000143622 | RIT1     | 27.433  | -0.712 | 0.278 | -2.560 | 0.010468 | 0.074896 | yes |
| ENSG00000143674 | MAP3K21  | 17.559  | -1.614 | 0.418 | -3.865 | 0.000111 | 0.002044 | yes |
| ENSG00000143799 | PARP1    | 330.206 | -0.779 | 0.103 | -7.590 | 3.21E-14 | 3.81E-12 | yes |
| ENSG00000144369 | FAM171B  | 12.276  | -1.268 | 0.594 | -2.136 | 0.032689 | 0.169682 | yes |
| ENSG00000144455 | SUMF1    | 11.987  | -0.771 | 0.498 | -1.548 | 0.121637 | 0.382716 | yes |
| ENSG00000144815 | NXPE3    | 17.830  | -1.373 | 0.450 | -3.055 | 0.002252 | 0.023789 | yes |
| ENSG00000144840 | RABL3    | 13.098  | -1.091 | 0.433 | -2.518 | 0.011812 | 0.081693 | yes |
| ENSG00000145284 | SCD5     | 20.504  | -0.782 | 0.303 | -2.578 | 0.009941 | 0.072164 | yes |
| ENSG00000145358 | DDIT4L   | 12.735  | -2.484 | 0.442 | -5.617 | 1.94E-08 | 9.34E-07 | yes |
| ENSG00000145386 | CCNA2    | 75.270  | -0.717 | 0.176 | -4.078 | 4.55E-05 | 0.000945 | yes |
| ENSG00000145506 | NKD2     | 18.597  | -0.889 | 0.292 | -3.041 | 0.002361 | 0.024644 | yes |
| ENSG00000145675 | PIK3R1   | 23.056  | -1.865 | 0.345 | -5.408 | 6.36E-08 | 2.68E-06 | yes |
| ENSG00000145703 | IQGAP2   | 27.709  | -1.098 | 0.266 | -4.122 | 3.76E-05 | 0.000801 | yes |
| ENSG00000145782 | ATG12    | 156.832 | -0.748 | 0.155 | -4.833 | 1.34E-06 | 4.19E-05 | yes |
| ENSG00000146373 | RNF217   | 19.839  | -0.776 | 0.342 | -2.269 | 0.023248 | 0.133145 | yes |
| ENSG00000146918 | NCAPG2   | 122.114 | -0.742 | 0.152 | -4.880 | 1.06E-06 | 3.42E-05 | yes |
| ENSG00000147050 | KDM6A    | 12.229  | -2.456 | 1.399 | -1.756 | 0.07911  | 0.295394 | yes |
| ENSG00000147394 | ZNF185   | 16.411  | -2.419 | 1.572 | -1.539 | 0.123898 | 0.386767 | yes |
| ENSG00000147676 | MAL2     | 274.898 | -2.038 | 1.447 | -1.408 | 0.159014 | 0.442931 | yes |
| ENSG00000147689 | FAM83A   | 54.002  | -1.531 | 1.672 | -0.916 | 0.359791 | 0.671342 | yes |
| ENSG00000147813 | NAPRT    | 23.527  | -1.691 | 0.690 | -2.452 | 0.014208 | 0.093436 | yes |
| ENSG00000147889 | CDKN2A   | 45.796  | -2.451 | 1.391 | -1.762 | 0.078042 | 0.293407 | yes |
| ENSG00000148200 | NR6A1    | 13.184  | -1.498 | 0.390 | -3.838 | 0.000124 | 0.002233 | yes |
| ENSG00000148225 | WDR31    | 12.758  | -0.772 | 0.356 | -2.171 | 0.029895 | 0.158536 | yes |
| ENSG00000148400 | NOTCH1   | 28.694  | -0.745 | 0.262 | -2.846 | 0.004427 | 0.040019 | yes |
| ENSG00000148468 | FAM171A1 | 45.487  | -0.790 | 0.199 | -3.967 | 7.26E-05 | 0.001421 | yes |
| ENSG00000148835 | TAF5     | 27.098  | -0.735 | 0.267 | -2.756 | 0.005846 | 0.049063 | yes |
| ENSG00000149591 | TAGLN    | 19.839  | -0.856 | 0.257 | -3.328 | 0.000876 | 0.011059 | yes |
| ENSG00000149679 | CABLES2  | 15.229  | -0.723 | 0.349 | -2.072 | 0.038244 | 0.186789 | yes |
| ENSG00000150782 | IL18     | 11.466  | -0.701 | 0.713 | -0.984 | 0.325036 | 0.638599 | yes |
| ENSG00000151726 | ACSL1    | 18.752  | -0.796 | 0.318 | -2.506 | 0.012221 | 0.083899 | yes |
| ENSG00000151849 | CENPJ    | 80.286  | -1.079 | 0.153 | -7.073 | 1.52E-12 | 1.48E-10 | yes |
| ENSG00000151883 | PARP8    | 12.405  | -0.963 | 0.770 | -1.250 | 0.211119 | 0.516061 | yes |
| ENSG00000152422 | XRCC4    | 68.626  | -0.712 | 0.160 | -4.436 | 9.15E-06 | 0.000229 | yes |
| ENSG00000152465 | NMT2     | 127.566 | -1.178 | 0.133 | -8.835 | 1.00E-18 | 1.88E-16 | yes |
| ENSG00000152527 | PLEKHH2  | 24.305  | -0.878 | 0.385 | -2.278 | 0.022723 | 0.131144 | yes |
| ENSG00000153044 | CENPH    | 39.999  | -0.915 | 0.238 | -3.850 | 0.000118 | 0.002149 | yes |
| ENSG00000153132 | CLGN     | 16.538  | -0.750 | 0.353 | -2.123 | 0.033755 | 0.17274  | yes |
| ENSG00000153208 | MERTK    | 10.607  | -1.299 | 0.551 | -2.355 | 0.018498 | 0.113173 | yes |
| ENSG00000153993 | SEMA3D   | 25.490  | -1.188 | 0.226 | -5.246 | 1.56E-07 | 5.99E-06 | yes |

|                 |          |         |        |       |        |          |          |     |
|-----------------|----------|---------|--------|-------|--------|----------|----------|-----|
| ENSG00000154310 | TNIK     | 18.270  | -0.723 | 0.632 | -1.144 | 0.252829 | 0.565033 | yes |
| ENSG00000154920 | EME1     | 16.818  | -1.439 | 0.364 | -3.949 | 7.86E-05 | 0.001526 | yes |
| ENSG00000155324 | GRAMD2B  | 33.279  | -0.870 | 0.267 | -3.256 | 0.00113  | 0.013598 | yes |
| ENSG00000155858 | LSM11    | 13.677  | -0.798 | 0.359 | -2.221 | 0.026356 | 0.145238 | yes |
| ENSG00000156052 | GNAQ     | 37.853  | -1.177 | 0.341 | -3.451 | 0.000559 | 0.007719 | yes |
| ENSG00000156136 | DCK      | 12.334  | -1.256 | 0.520 | -2.417 | 0.01567  | 0.100427 | yes |
| ENSG00000156510 | HKDC1    | 104.578 | -1.868 | 0.192 | -9.748 | 1.88E-22 | 4.50E-20 | yes |
| ENSG00000156970 | BUB1B    | 93.113  | -0.771 | 0.165 | -4.684 | 2.81E-06 | 8.04E-05 | yes |
| ENSG00000157214 | STEAP2   | 12.756  | -1.867 | 0.687 | -2.718 | 0.006573 | 0.05363  | yes |
| ENSG00000157216 | SSBP3    | 29.819  | -0.762 | 0.266 | -2.863 | 0.004201 | 0.038377 | yes |
| ENSG00000158301 | GPRASP2  | 14.398  | -1.249 | 0.356 | -3.508 | 0.000452 | 0.006512 | yes |
| ENSG00000158373 | H2BC5    | 37.538  | -0.994 | 0.293 | -3.391 | 0.000697 | 0.009247 | yes |
| ENSG00000158402 | CDC25C   | 44.425  | -1.236 | 0.213 | -5.795 | 6.84E-09 | 3.75E-07 | yes |
| ENSG00000158406 | H4C8     | 10.864  | -0.741 | 0.536 | -1.382 | 0.167019 | 0.454566 | yes |
| ENSG00000158710 | TAGLN2   | 436.757 | -0.981 | 0.184 | -5.329 | 9.85E-08 | 3.97E-06 | yes |
| ENSG00000158769 | F11R     | 43.982  | -0.837 | 0.328 | -2.548 | 0.010828 | 0.076757 | yes |
| ENSG00000159167 | STC1     | 41.811  | -1.821 | 0.234 | -7.770 | 7.83E-15 | 9.55E-13 | yes |
| ENSG00000159217 | IGF2BP1  | 22.330  | -1.589 | 1.262 | -1.259 | 0.207925 | 0.511637 | yes |
| ENSG00000160179 | ABCG1    | 14.395  | -1.231 | 0.335 | -3.672 | 0.00024  | 0.00385  | yes |
| ENSG00000160298 | C21orf58 | 26.668  | -0.751 | 0.250 | -3.004 | 0.002666 | 0.027081 | yes |
| ENSG00000160392 | C19orf47 | 19.219  | -0.737 | 0.349 | -2.115 | 0.034449 | 0.174432 | yes |
| ENSG00000160446 | ZDHC12   | 19.040  | -0.826 | 0.335 | -2.463 | 0.013793 | 0.091606 | yes |
| ENSG00000160570 | DEDD2    | 22.097  | -0.961 | 0.319 | -3.013 | 0.00259  | 0.026423 | yes |
| ENSG00000160803 | UBQLN4   | 12.352  | -1.081 | 0.392 | -2.757 | 0.005833 | 0.049045 | yes |
| ENSG00000160957 | RECQL4   | 36.389  | -0.831 | 0.264 | -3.153 | 0.001618 | 0.018462 | yes |
| ENSG00000161010 | MRNIP    | 29.062  | -0.758 | 0.239 | -3.168 | 0.001537 | 0.017622 | yes |
| ENSG00000161677 | JOSD2    | 13.895  | -0.746 | 0.366 | -2.039 | 0.041404 | 0.196747 | yes |
| ENSG00000161682 | FAM171A2 | 10.651  | -1.142 | 0.437 | -2.613 | 0.008967 | 0.066878 | yes |
| ENSG00000161791 | FMNL3    | 10.553  | -1.097 | 0.455 | -2.414 | 0.015795 | 0.100989 | yes |
| ENSG00000161847 | RAVER1   | 20.139  | -0.981 | 0.316 | -3.101 | 0.001929 | 0.021234 | yes |
| ENSG00000162062 | TEDC2    | 10.519  | -0.700 | 0.515 | -1.360 | 0.173918 | 0.464951 | yes |
| ENSG00000162063 | CCNF     | 37.878  | -0.986 | 0.221 | -4.469 | 7.86E-06 | 0.0002   | yes |
| ENSG00000162174 | ASRGL1   | 32.097  | -0.781 | 0.282 | -2.765 | 0.005697 | 0.048321 | yes |
| ENSG00000162396 | PARS2    | 10.259  | -0.707 | 0.456 | -1.552 | 0.120599 | 0.381252 | yes |
| ENSG00000162496 | DHRS3    | 36.596  | -1.165 | 0.300 | -3.879 | 0.000105 | 0.001947 | yes |
| ENSG00000162576 | MXRA8    | 25.029  | -1.177 | 1.332 | -0.884 | 0.376894 | 0.683334 | yes |
| ENSG00000162852 | CNST     | 21.297  | -0.891 | 0.300 | -2.970 | 0.002976 | 0.029326 | yes |
| ENSG00000163006 | CCDC138  | 20.148  | -0.728 | 0.321 | -2.266 | 0.023481 | 0.134021 | yes |
| ENSG00000163013 | FBXO41   | 16.403  | -0.754 | 0.288 | -2.616 | 0.00891  | 0.066602 | yes |
| ENSG00000163171 | CDC42EP3 | 248.106 | -0.962 | 0.135 | -7.113 | 1.13E-12 | 1.14E-10 | yes |
| ENSG00000163346 | PBXIP1   | 22.147  | -0.823 | 0.303 | -2.721 | 0.006517 | 0.053356 | yes |
| ENSG00000163435 | ELF3     | 47.249  | -0.940 | 0.275 | -3.423 | 0.000619 | 0.008397 | yes |
| ENSG00000163463 | KRTCAP2  | 13.832  | -0.927 | 0.415 | -2.234 | 0.025472 | 0.142015 | yes |

|                 |          |         |        |       |         |          |          |     |
|-----------------|----------|---------|--------|-------|---------|----------|----------|-----|
| ENSG00000163491 | NEK10    | 10.083  | -1.467 | 0.384 | -3.823  | 0.000132 | 0.002355 | yes |
| ENSG00000163508 | EOMES    | 12.104  | -1.805 | 0.336 | -5.378  | 7.54E-08 | 3.12E-06 | yes |
| ENSG00000163545 | NUAK2    | 24.230  | -0.996 | 0.283 | -3.522  | 0.000429 | 0.006283 | yes |
| ENSG00000163624 | CDS1     | 17.693  | -1.499 | 0.601 | -2.496  | 0.01256  | 0.085458 | yes |
| ENSG00000163918 | RFC4     | 43.933  | -0.776 | 0.203 | -3.814  | 0.000137 | 0.002431 | yes |
| ENSG00000164171 | ITGA2    | 115.252 | -1.285 | 0.413 | -3.115  | 0.001839 | 0.020505 | yes |
| ENSG00000164611 | PTTG1    | 309.045 | -0.999 | 0.094 | -10.682 | 1.23E-26 | 4.07E-24 | yes |
| ENSG00000164687 | FABP5    | 15.280  | -1.338 | 0.403 | -3.324  | 0.000886 | 0.011168 | yes |
| ENSG00000164695 | CHMP4C   | 67.574  | -1.453 | 1.563 | -0.929  | 0.35287  | 0.664523 | yes |
| ENSG00000164855 | TMEM184A | 24.251  | -0.945 | 0.315 | -3.001  | 0.00269  | 0.027245 | yes |
| ENSG00000165238 | WNK2     | 23.439  | -0.905 | 0.277 | -3.263  | 0.001101 | 0.013317 | yes |
| ENSG00000165480 | SKA3     | 38.990  | -0.935 | 0.246 | -3.799  | 0.000146 | 0.002553 | yes |
| ENSG00000165801 | ARHGEF40 | 11.192  | -1.273 | 0.410 | -3.103  | 0.001919 | 0.021175 | yes |
| ENSG00000165810 | BTNL9    | 19.743  | -1.106 | 0.273 | -4.045  | 5.22E-05 | 0.001069 | yes |
| ENSG00000165821 | SALL2    | 17.867  | -0.973 | 0.295 | -3.299  | 0.000972 | 0.012109 | yes |
| ENSG00000165891 | E2F7     | 27.636  | -0.746 | 0.332 | -2.245  | 0.024773 | 0.139057 | yes |
| ENSG00000165895 | ARHGAP42 | 15.050  | -1.323 | 1.080 | -1.225  | 0.220499 | 0.528118 | yes |
| ENSG00000166825 | ANPEP    | 23.494  | -2.996 | 1.455 | -2.059  | 0.039454 | 0.190142 | yes |
| ENSG00000166831 | RBPM52   | 16.038  | -0.831 | 0.355 | -2.339  | 0.019354 | 0.117274 | yes |
| ENSG00000166974 | MAPRE2   | 13.284  | -0.971 | 0.410 | -2.367  | 0.017921 | 0.110613 | yes |
| ENSG00000167641 | PPP1R14A | 95.843  | -2.155 | 0.250 | -8.619  | 6.74E-18 | 1.09E-15 | yes |
| ENSG00000167645 | YIF1B    | 17.355  | -0.923 | 0.339 | -2.726  | 0.006414 | 0.052668 | yes |
| ENSG00000167670 | CHAF1A   | 86.951  | -0.819 | 0.169 | -4.836  | 1.32E-06 | 4.17E-05 | yes |
| ENSG00000167680 | SEMA6B   | 11.757  | -0.919 | 0.422 | -2.176  | 0.029558 | 0.157068 | yes |
| ENSG00000167703 | SLC43A2  | 19.583  | -1.875 | 0.313 | -5.992  | 2.07E-09 | 1.26E-07 | yes |
| ENSG00000168505 | GBX2     | 11.990  | -1.536 | 0.335 | -4.584  | 4.57E-06 | 0.000125 | yes |
| ENSG00000168672 | LRATD2   | 16.175  | -0.958 | 0.760 | -1.260  | 0.207553 | 0.511423 | yes |
| ENSG00000168779 | SHOX2    | 116.185 | -0.804 | 0.170 | -4.736  | 2.17E-06 | 6.48E-05 | yes |
| ENSG00000169230 | PRELID1  | 255.705 | -0.806 | 0.118 | -6.856  | 7.07E-12 | 6.18E-10 | yes |
| ENSG00000169241 | SLC50A1  | 59.779  | -0.716 | 0.189 | -3.791  | 0.00015  | 0.002622 | yes |
| ENSG00000169258 | GPRIN1   | 13.928  | -0.943 | 0.369 | -2.553  | 0.01067  | 0.076027 | yes |
| ENSG00000169306 | IL1RAPL1 | 16.472  | -2.432 | 0.390 | -6.231  | 4.63E-10 | 3.20E-08 | yes |
| ENSG00000169679 | BUB1     | 150.409 | -0.981 | 0.127 | -7.755  | 8.86E-15 | 1.07E-12 | yes |
| ENSG00000169855 | ROBO1    | 29.656  | -1.040 | 0.260 | -3.999  | 6.36E-05 | 0.001259 | yes |
| ENSG00000170412 | GPRC5C   | 13.774  | -1.263 | 0.457 | -2.764  | 0.005708 | 0.048386 | yes |
| ENSG00000170468 | RIOX1    | 28.973  | -0.706 | 0.253 | -2.788  | 0.005301 | 0.045663 | yes |
| ENSG00000170522 | ELOVL6   | 43.007  | -0.960 | 0.248 | -3.877  | 0.000106 | 0.001961 | yes |
| ENSG00000170571 | EMB      | 23.465  | -3.637 | 0.904 | -4.024  | 5.73E-05 | 0.001161 | yes |
| ENSG00000170734 | POLH     | 17.629  | -0.876 | 0.329 | -2.664  | 0.007727 | 0.059941 | yes |
| ENSG00000171163 | ZNF692   | 22.690  | -0.703 | 0.337 | -2.087  | 0.036871 | 0.182374 | yes |
| ENSG00000171241 | SHCBP1   | 69.567  | -0.743 | 0.181 | -4.114  | 3.89E-05 | 0.000826 | yes |
| ENSG00000171604 | CXXC5    | 96.837  | -0.859 | 0.190 | -4.517  | 6.27E-06 | 0.000165 | yes |
| ENSG00000171729 | TMEM51   | 25.660  | -0.734 | 0.299 | -2.456  | 0.014035 | 0.092638 | yes |

|                 |             |         |        |       |         |          |          |     |
|-----------------|-------------|---------|--------|-------|---------|----------|----------|-----|
| ENSG00000171861 | MRM3        | 26.804  | -0.802 | 0.258 | -3.105  | 0.001905 | 0.021052 | yes |
| ENSG00000171864 | PRND        | 18.586  | -1.204 | 0.343 | -3.508  | 0.000451 | 0.006507 | yes |
| ENSG00000172062 | SMN1        | 13.632  | -0.745 | 0.423 | -1.760  | 0.078353 | 0.294228 | yes |
| ENSG00000172081 | MOB3A       | 18.268  | -0.724 | 0.305 | -2.378  | 0.01742  | 0.108146 | yes |
| ENSG00000172123 | SLFN12      | 22.239  | -2.010 | 0.992 | -2.027  | 0.042684 | 0.200498 | yes |
| ENSG00000172244 | C5orf34     | 10.657  | -0.955 | 0.408 | -2.340  | 0.019287 | 0.116955 | yes |
| ENSG00000172331 | BPGM        | 11.761  | -0.803 | 0.506 | -1.589  | 0.112158 | 0.364867 | yes |
| ENSG00000172965 | MIR4435-2HC | 117.841 | -0.710 | 0.165 | -4.315  | 1.59E-05 | 0.000374 | yes |
| ENSG00000173207 | CKS1B       | 202.286 | -0.866 | 0.210 | -4.131  | 3.61E-05 | 0.000776 | yes |
| ENSG00000173267 | SNCG        | 14.880  | -2.072 | 0.411 | -5.047  | 4.48E-07 | 1.57E-05 | yes |
| ENSG00000174371 | EXO1        | 32.535  | -0.945 | 0.256 | -3.694  | 0.00022  | 0.003595 | yes |
| ENSG00000175137 | SH3BP5L     | 34.705  | -0.895 | 0.307 | -2.910  | 0.003617 | 0.034184 | yes |
| ENSG00000175315 | CST6        | 215.160 | -1.455 | 1.561 | -0.932  | 0.351417 | 0.663237 | yes |
| ENSG00000175455 | CCDC14      | 148.041 | -0.751 | 0.121 | -6.212  | 5.24E-10 | 3.59E-08 | yes |
| ENSG00000176170 | SPHK1       | 13.173  | -1.848 | 0.800 | -2.308  | 0.020984 | 0.123605 | yes |
| ENSG00000176749 | CDK5R1      | 21.261  | -0.881 | 0.326 | -2.703  | 0.006866 | 0.055146 | yes |
| ENSG00000177303 | CASKIN2     | 10.965  | -0.926 | 0.451 | -2.054  | 0.039963 | 0.191958 | yes |
| ENSG00000177570 | SAMD12      | 11.656  | -1.531 | 1.686 | -0.908  | 0.363755 | 0.674588 | yes |
| ENSG00000177706 | FAM20C      | 18.957  | -1.076 | 0.333 | -3.232  | 0.00123  | 0.014628 | yes |
| ENSG00000177707 | NECTIN3     | 51.121  | -1.220 | 0.205 | -5.956  | 2.59E-09 | 1.56E-07 | yes |
| ENSG00000178307 | TMEM11      | 47.082  | -0.815 | 0.218 | -3.733  | 0.00019  | 0.003174 | yes |
| ENSG00000178531 | CTXN1       | 45.577  | -0.921 | 0.232 | -3.963  | 7.40E-05 | 0.001444 | yes |
| ENSG00000178999 | AURKB       | 143.141 | -0.772 | 0.136 | -5.686  | 1.30E-08 | 6.52E-07 | yes |
| ENSG00000179348 | GATA2       | 41.393  | -0.857 | 0.202 | -4.235  | 2.28E-05 | 0.000514 | yes |
| ENSG00000179981 | TSHZ1       | 25.705  | -0.888 | 0.260 | -3.415  | 0.000639 | 0.008609 | yes |
| ENSG00000180448 | ARHGAP45    | 13.507  | -1.035 | 0.431 | -2.399  | 0.016433 | 0.103547 | yes |
| ENSG00000180530 | NRIP1       | 64.931  | -1.473 | 0.236 | -6.231  | 4.65E-10 | 3.20E-08 | yes |
| ENSG00000180596 | H2BC4       | 28.847  | -0.736 | 0.312 | -2.361  | 0.018203 | 0.111861 | yes |
| ENSG00000180806 | HOXC9       | 36.063  | -1.531 | 1.671 | -0.916  | 0.359559 | 0.671342 | yes |
| ENSG00000181104 | F2R         | 181.861 | -1.180 | 0.122 | -9.648  | 5.03E-22 | 1.18E-19 | yes |
| ENSG00000181444 | ZNF467      | 15.461  | -0.801 | 0.375 | -2.137  | 0.032635 | 0.169505 | yes |
| ENSG00000181744 | DIPK2A      | 11.601  | -1.346 | 0.438 | -3.075  | 0.002104 | 0.022698 | yes |
| ENSG00000181885 | CLDN7       | 53.187  | -2.039 | 1.452 | -1.405  | 0.16006  | 0.444336 | yes |
| ENSG00000182405 | PGBD4       | 17.528  | -0.841 | 0.339 | -2.478  | 0.01321  | 0.088627 | yes |
| ENSG00000182518 | FAM104B     | 19.792  | -0.785 | 0.317 | -2.472  | 0.013432 | 0.089765 | yes |
| ENSG00000182809 | CRIP2       | 81.013  | -1.623 | 0.198 | -8.203  | 2.34E-16 | 3.28E-14 | yes |
| ENSG00000183018 | SPNS2       | 14.700  | -2.420 | 1.575 | -1.537  | 0.124412 | 0.387535 | yes |
| ENSG00000183048 | SLC25A10    | 20.625  | -0.772 | 0.324 | -2.381  | 0.017248 | 0.107414 | yes |
| ENSG00000183668 | PSG9        | 29.969  | -3.093 | 0.269 | -11.515 | 1.11E-30 | 4.99E-28 | yes |
| ENSG00000183779 | ZNF703      | 11.472  | -1.013 | 0.391 | -2.591  | 0.009578 | 0.070377 | yes |
| ENSG00000183814 | LIN9        | 19.097  | -0.926 | 0.371 | -2.499  | 0.012439 | 0.084842 | yes |
| ENSG00000183856 | IQGAP3      | 50.009  | -1.011 | 0.206 | -4.919  | 8.70E-07 | 2.86E-05 | yes |
| ENSG00000184205 | TSPYL2      | 68.858  | -0.936 | 0.206 | -4.535  | 5.76E-06 | 0.000154 | yes |



|                 |            |          |        |       |        |          |          |     |
|-----------------|------------|----------|--------|-------|--------|----------|----------|-----|
| ENSG00000184226 | PCDH9      | 11.464   | -1.157 | 0.531 | -2.177 | 0.02947  | 0.156859 | yes |
| ENSG00000184260 | H2AC20     | 91.065   | -0.888 | 0.205 | -4.323 | 1.54E-05 | 0.000363 | yes |
| ENSG00000184292 | TACSTD2    | 73.482   | -1.531 | 1.670 | -0.917 | 0.359256 | 0.671172 | yes |
| ENSG00000184349 | EFNA5      | 53.554   | -1.117 | 0.222 | -5.039 | 4.68E-07 | 1.63E-05 | yes |
| ENSG00000184357 | H1-5       | 35.168   | -0.747 | 0.244 | -3.066 | 0.002167 | 0.023148 | yes |
| ENSG00000184661 | CDCA2      | 114.754  | -0.714 | 0.133 | -5.369 | 7.94E-08 | 3.25E-06 | yes |
| ENSG00000184986 | TMEM121    | 15.077   | -1.693 | 0.347 | -4.887 | 1.02E-06 | 3.32E-05 | yes |
| ENSG00000185347 | TEDC1      | 20.285   | -0.988 | 0.277 | -3.570 | 0.000357 | 0.005418 | yes |
| ENSG00000185483 | ROR1       | 11.721   | -1.558 | 0.558 | -2.792 | 0.005238 | 0.045424 | yes |
| ENSG00000186472 | PCLO       | 25.715   | -1.957 | 0.357 | -5.479 | 4.27E-08 | 1.88E-06 | yes |
| ENSG00000186481 | ANKRD20A5P | 10.246   | -0.956 | 0.661 | -1.447 | 0.147815 | 0.424679 | yes |
| ENSG00000186871 | ERCC6L     | 32.784   | -0.863 | 0.265 | -3.262 | 0.001106 | 0.013349 | yes |
| ENSG00000187098 | MITF       | 30.326   | -3.554 | 0.403 | -8.821 | 1.13E-18 | 2.10E-16 | yes |
| ENSG00000187231 | SESTD1     | 15.185   | -1.327 | 0.433 | -3.063 | 0.002191 | 0.023362 | yes |
| ENSG00000187244 | BCAM       | 17.898   | -0.978 | 0.485 | -2.019 | 0.043498 | 0.203625 | yes |
| ENSG00000187634 | SAMD11     | 18.020   | -0.964 | 0.642 | -1.502 | 0.133207 | 0.402926 | yes |
| ENSG00000187778 | MCRS1      | 49.050   | -0.827 | 0.275 | -3.009 | 0.002618 | 0.026666 | yes |
| ENSG00000188010 | MORN2      | 12.764   | -1.637 | 0.425 | -3.854 | 0.000116 | 0.002116 | yes |
| ENSG00000188641 | DPYD       | 99.498   | -0.772 | 0.180 | -4.292 | 1.77E-05 | 0.000409 | yes |
| ENSG00000189171 | S100A13    | 150.115  | -1.083 | 0.178 | -6.098 | 1.08E-09 | 6.92E-08 | yes |
| ENSG00000189337 | KAZN       | 54.575   | -1.225 | 0.210 | -5.832 | 5.48E-09 | 3.09E-07 | yes |
| ENSG00000196368 | NUDT11     | 21.822   | -1.836 | 0.310 | -5.924 | 3.14E-09 | 1.85E-07 | yes |
| ENSG00000196611 | MMP1       | 15.449   | -1.135 | 0.401 | -2.831 | 0.004643 | 0.041382 | yes |
| ENSG00000196739 | COL27A1    | 47.447   | -0.929 | 0.168 | -5.535 | 3.12E-08 | 1.41E-06 | yes |
| ENSG00000196878 | LAMB3      | 23.311   | -1.591 | 1.037 | -1.534 | 0.125041 | 0.388924 | yes |
| ENSG00000196954 | CASP4      | 98.654   | -0.849 | 0.142 | -5.981 | 2.21E-09 | 1.34E-07 | yes |
| ENSG00000197043 | ANXA6      | 76.321   | -0.947 | 0.179 | -5.297 | 1.18E-07 | 4.71E-06 | yes |
| ENSG00000197061 | H4C3       | 1312.132 | -0.743 | 0.140 | -5.293 | 1.20E-07 | 4.76E-06 | yes |
| ENSG00000197142 | ACSL5      | 13.205   | -1.449 | 1.576 | -0.919 | 0.357953 | 0.669999 | yes |
| ENSG00000197183 | NOL4L      | 13.520   | -0.818 | 0.362 | -2.262 | 0.023709 | 0.134784 | yes |
| ENSG00000197555 | SIPA1L1    | 36.571   | -1.136 | 0.281 | -4.047 | 5.20E-05 | 0.001065 | yes |
| ENSG00000197782 | ZNF780A    | 38.623   | -0.882 | 0.348 | -2.533 | 0.011294 | 0.079128 | yes |
| ENSG00000197948 | FCHSD1     | 16.177   | -0.890 | 0.362 | -2.459 | 0.013937 | 0.092286 | yes |
| ENSG00000198055 | GRK6       | 69.473   | -0.815 | 0.169 | -4.834 | 1.34E-06 | 4.19E-05 | yes |
| ENSG00000198626 | RYR2       | 46.657   | -1.185 | 0.263 | -4.510 | 6.49E-06 | 0.000169 | yes |
| ENSG00000198863 | RUNDC1     | 38.679   | -0.782 | 0.256 | -3.055 | 0.002253 | 0.023789 | yes |
| ENSG00000198892 | SHISA4     | 19.047   | -0.757 | 0.333 | -2.275 | 0.022879 | 0.13174  | yes |
| ENSG00000199377 | RNU5F-1    | 34.949   | -0.936 | 0.361 | -2.591 | 0.009564 | 0.070311 | yes |
| ENSG00000200090 | n/a        | 14.629   | -0.787 | 0.376 | -2.095 | 0.036172 | 0.180151 | yes |
| ENSG00000201098 | RNY1       | 15.682   | -1.767 | 0.458 | -3.862 | 0.000113 | 0.002065 | yes |
| ENSG00000201592 | n/a        | 10.502   | -1.026 | 0.418 | -2.457 | 0.014015 | 0.092595 | yes |
| ENSG00000203668 | CHML       | 49.819   | -0.942 | 0.219 | -4.304 | 1.68E-05 | 0.000392 | yes |
| ENSG00000204186 | ZDBF2      | 10.875   | -2.892 | 1.146 | -2.523 | 0.01163  | 0.080711 | yes |

|                 |           |           |        |       |         |          |          |     |
|-----------------|-----------|-----------|--------|-------|---------|----------|----------|-----|
| ENSG00000204308 | RNF5      | 39.642    | -0.945 | 0.230 | -4.109  | 3.98E-05 | 0.000844 | yes |
| ENSG00000204397 | CARD16    | 23.929    | -2.335 | 0.277 | -8.430  | 3.47E-17 | 5.29E-15 | yes |
| ENSG00000204536 | CCHCR1    | 14.102    | -0.922 | 0.348 | -2.647  | 0.008111 | 0.062227 | yes |
| ENSG00000204650 | LINC02210 | 18.728    | -0.886 | 0.323 | -2.743  | 0.006081 | 0.050656 | yes |
| ENSG00000204859 | ZBTB48    | 10.898    | -0.940 | 0.432 | -2.174  | 0.029669 | 0.157516 | yes |
| ENSG00000205544 | TMEM256   | 40.820    | -0.742 | 0.247 | -2.999  | 0.002705 | 0.027351 | yes |
| ENSG00000205922 | ONECUT3   | 24.923    | -2.413 | 1.568 | -1.539  | 0.123751 | 0.386767 | yes |
| ENSG00000211459 | MT-RNR1   | 48996.297 | -0.716 | 0.260 | -2.752  | 0.005914 | 0.04945  | yes |
| ENSG00000213347 | MXD3      | 11.968    | -1.362 | 0.403 | -3.382  | 0.000719 | 0.009455 | yes |
| ENSG00000213397 | HAUS7     | 22.769    | -0.883 | 0.287 | -3.081  | 0.002066 | 0.022443 | yes |
| ENSG00000214357 | NEURL1B   | 54.359    | -0.884 | 0.251 | -3.522  | 0.000428 | 0.006283 | yes |
| ENSG00000214575 | CPEB1     | 10.082    | -1.017 | 0.823 | -1.235  | 0.216752 | 0.522824 | yes |
| ENSG00000215105 | TTC3P1    | 20.260    | -1.372 | 0.300 | -4.565  | 5.00E-06 | 0.000135 | yes |
| ENSG00000220804 | LINC01881 | 12.899    | -0.813 | 0.396 | -2.054  | 0.039985 | 0.191966 | yes |
| ENSG00000221926 | TRIM16    | 14.178    | -0.862 | 0.425 | -2.029  | 0.042474 | 0.199908 | yes |
| ENSG00000222041 | CYTOR     | 94.123    | -1.063 | 0.177 | -6.013  | 1.82E-09 | 1.12E-07 | yes |
| ENSG00000223784 | LINP1     | 14.137    | -2.511 | 0.764 | -3.285  | 0.001018 | 0.012575 | yes |
| ENSG00000223949 | ROR1-AS1  | 32.242    | -1.891 | 0.226 | -8.379  | 5.35E-17 | 7.99E-15 | yes |
| ENSG00000224287 | MSL3P1    | 10.134    | -2.408 | 1.584 | -1.520  | 0.128418 | 0.394657 | yes |
| ENSG00000226137 | BAIAP2-DT | 18.637    | -0.886 | 0.357 | -2.480  | 0.013146 | 0.088362 | yes |
| ENSG00000228716 | DHFR      | 41.073    | -0.860 | 0.234 | -3.682  | 0.000231 | 0.003732 | yes |
| ENSG00000228742 | LINC02577 | 32.876    | -0.781 | 0.228 | -3.421  | 0.000624 | 0.008444 | yes |
| ENSG00000231607 | DLEU2     | 13.922    | -1.311 | 0.446 | -2.938  | 0.003302 | 0.031815 | yes |
| ENSG00000233461 | n/a       | 11.602    | -1.348 | 0.554 | -2.433  | 0.014975 | 0.09725  | yes |
| ENSG00000235609 | n/a       | 40.588    | -2.084 | 0.200 | -10.399 | 2.50E-25 | 8.09E-23 | yes |
| ENSG00000237649 | KIFC1     | 86.491    | -0.805 | 0.193 | -4.174  | 2.99E-05 | 0.000657 | yes |
| ENSG00000238105 | GOLGA2P5  | 17.072    | -0.784 | 0.311 | -2.524  | 0.011619 | 0.080676 | yes |
| ENSG00000239521 | CASTOR3   | 17.491    | -0.795 | 0.322 | -2.471  | 0.013492 | 0.090087 | yes |
| ENSG00000240616 | RPS6P25   | 10.249    | -0.894 | 0.414 | -2.158  | 0.030914 | 0.162571 | yes |
| ENSG00000241404 | EGFL8     | 14.521    | -0.883 | 0.387 | -2.282  | 0.022503 | 0.130764 | yes |
| ENSG00000242114 | MTFP1     | 18.047    | -0.758 | 0.360 | -2.106  | 0.035206 | 0.17683  | yes |
| ENSG00000242195 | SRRM1P2   | 67.808    | -1.297 | 0.199 | -6.528  | 6.69E-11 | 5.13E-09 | yes |
| ENSG00000250222 | n/a       | 12.153    | -0.999 | 0.359 | -2.784  | 0.005369 | 0.046048 | yes |
| ENSG00000253276 | CCDC71L   | 212.122   | -1.031 | 0.250 | -4.119  | 3.81E-05 | 0.000811 | yes |
| ENSG00000254901 | BORCS8    | 29.635    | -1.132 | 0.277 | -4.091  | 4.30E-05 | 0.000903 | yes |
| ENSG00000255823 | MTRNR2L8  | 11.095    | -0.702 | 0.422 | -1.662  | 0.096425 | 0.332853 | yes |
| ENSG00000257698 | GIHCG     | 18.271    | -1.174 | 0.418 | -2.808  | 0.004983 | 0.04387  | yes |
| ENSG00000258301 | VASH1-AS1 | 10.431    | -0.707 | 0.459 | -1.538  | 0.123943 | 0.386767 | yes |
| ENSG00000264229 | RNU4ATAC  | 2672.982  | -1.122 | 0.243 | -4.614  | 3.95E-06 | 0.00011  | yes |
| ENSG00000266094 | RASSF5    | 10.447    | -0.911 | 0.492 | -1.851  | 0.064224 | 0.26193  | yes |
| ENSG00000269343 | ZNF587B   | 15.681    | -0.984 | 0.386 | -2.549  | 0.010812 | 0.076682 | yes |
| ENSG00000269713 | NBPF9     | 19.080    | -0.915 | 0.294 | -3.112  | 0.001856 | 0.020665 | yes |
| ENSG00000270885 | RASL10B   | 16.681    | -0.778 | 0.314 | -2.475  | 0.013316 | 0.08916  | yes |

|                 |           |         |        |       |        |          |          |     |
|-----------------|-----------|---------|--------|-------|--------|----------|----------|-----|
| ENSG00000272398 | CD24      | 17.220  | -1.169 | 0.955 | -1.224 | 0.220949 | 0.528729 | yes |
| ENSG00000272620 | AFAP1-AS1 | 44.173  | -3.000 | 1.448 | -2.071 | 0.038323 | 0.186883 | yes |
| ENSG00000273706 | LHX1      | 127.982 | -1.191 | 0.138 | -8.611 | 7.23E-18 | 1.15E-15 | yes |
| ENSG00000275180 | n/a       | 11.358  | -1.101 | 0.393 | -2.803 | 0.005055 | 0.044288 | yes |
| ENSG00000276043 | UHRF1     | 18.435  | -0.967 | 0.331 | -2.918 | 0.003522 | 0.033498 | yes |
| ENSG00000276368 | H2AC14    | 55.015  | -1.018 | 0.253 | -4.023 | 5.75E-05 | 0.001163 | yes |
| ENSG00000277268 | LHX1-DT   | 38.591  | -0.868 | 0.245 | -3.549 | 0.000386 | 0.005823 | yes |
