# Supplementary material for: Transcriptomic and functional analysis of ANGPTL4 overexpression in pancreatic cancer nominates targets that reverse chemoresistance
Source: Springer Nature journal article supplement (doi:10.1186/s12885-023-11010-1), 2023-06-08
Supplement: MOESM5 [file 25464062]

Supplementary Table 3: 114 Gemcitabine Resistance Genes

| #  | HGNC Symbol | Ensembl Gene    |
|----|-------------|-----------------|
| 1  | BMI1        | ENSG00000168283 |
| 2  | POLD3       | ENSG00000077514 |
| 3  | PARP1       | ENSG00000143799 |
| 4  | ANO1        | ENSG00000131620 |
| 5  | SCEL        | ENSG00000136155 |
| 6  | NET1        | ENSG00000173848 |
| 7  | BNIP3       | ENSG00000176171 |
| 8  | CCDC148     | ENSG00000153237 |
| 9  | SH3RF2      | ENSG00000156463 |
| 10 | CACNA1D     | ENSG00000157388 |
| 11 | AP1M2       | ENSG00000129354 |
| 12 | C4orf19     | ENSG00000154274 |
| 13 | VGLL1       | ENSG00000102243 |
| 14 | INPP4B      | ENSG00000109452 |
| 15 | INSIG2      | ENSG00000125629 |
| 16 | SLC29A1     | ENSG00000112759 |
| 17 | dCK         | ENSG00000156136 |
| 18 | RRM1        | ENSG00000167325 |
| 19 | RRM2        | ENSG00000171848 |
| 20 | TOR1A       | ENSG00000136827 |
| 21 | VIPR1       | ENSG00000114812 |
| 22 | ATP11C      | ENSG00000101974 |
| 23 | MTSS1       | ENSG00000170873 |
| 24 | SAFB        | ENSG00000160633 |
| 25 | RALBP1      | ENSG00000017797 |
| 26 | SMAD2       | ENSG00000175387 |
| 27 | ptk2        | ENSG00000169398 |
| 28 | TRAF6       | ENSG00000175104 |
| 29 | MADD        | ENSG00000110514 |
| 30 | PPP3CB      | ENSG00000107758 |
| 31 | TSC1        | ENSG00000165699 |
| 32 | STAT5A      | ENSG00000126561 |
| 33 | SOCS5       | ENSG00000171150 |
| 34 | JADE3       | ENSG00000102221 |
| 35 | PIK3C3      | ENSG00000078142 |
| 36 | UNC13B      | ENSG00000198722 |
| 37 | MAP3K7      | ENSG00000135341 |
| 38 | LTBP1       | ENSG00000049323 |
| 39 | ITGA9       | ENSG00000144668 |
| 40 | GNAQ        | ENSG00000156052 |
| 41 | KAT6A       | ENSG00000083168 |

|             |                   |
|-------------|-------------------|
| 42 SKIP     | ENSG00000100603   |
| 43 C5       | ENSG00000106804   |
| 44 PPP1R15A | ENSG00000087074   |
| 45 LRP3     | ENSG00000130881   |
| 46 SLC9A3   | ENSG00000066230   |
| 47 SAC3D1   | ENSG00000168061   |
| 48 SLC25A51 | ENSG00000122696   |
| 49 SEMA5A   | ENSG00000112902   |
| 50 ELN      | ENSG00000049540   |
| 51 ZC3H11A  | ENSG00000058673   |
| 52 OGT      | ENSG00000147162   |
| 53 WAPL     | ENSG00000062650   |
| 54 UAP1     | ENSG00000117143   |
| 55 INPP5E   | ENSG00000148384   |
| 56 HECA     | ENSG00000112406   |
| 57 RPS21    | ENSG00000171858   |
| 58 PCSK7    | ENSG00000160613   |
| 59 SEC23B   | ENSG00000101310   |
| 60 OGA      | ENSG00000198408   |
| 61 LTV1     | ENSG00000135521   |
| 62 HAGH     | ENSG00000063854   |
| 63 LAMP2    | ENSG00000005893   |
| 64 NFKBIB   | ENSG00000104825   |
| 65 AKT1     | ENSG00000142208   |
| 66 MAPK1    | ENSG00000100030   |
| 67 HIF1A    | ENSG00000100644   |
| 68 SHH      | ENSG00000164690   |
| 69 PI3KCB   | ENSG00000051382   |
| 70 MAP3K10  | ENSG00000130758   |
| 71 ABCG2    | ENSG00000118777   |
| 72 ALDH1A1  | ENSG00000165092   |
| 73 CD24     | ENSG00000272398   |
| 74 FZD      | No data available |
| 75 DLV1     | ENSG00000107404   |
| 76 APC      | ENSG00000134982   |
| 77 GSK3A    | ENSG00000105723   |
| 78 AXIN2    | ENSG00000168646   |
| 79 NLK      | ENSG00000087095   |
| 80 NFAM1    | ENSG00000235568   |
| 81 WNT5A    | ENSG00000114251   |
| 82 ZEB1     | ENSG00000148516   |
| 83 AXIN1    | ENSG00000103126   |
| 84 DLL1     | ENSG00000198719   |

|     |         |                   |
|-----|---------|-------------------|
| 85  | JAG1    | ENSG00000101384   |
| 86  | CSNK1A1 | ENSG00000113712   |
| 87  | SNAIL   | No data available |
| 88  | WNT2    | ENSG00000105989   |
| 89  | PDGFRA  | ENSG00000134853   |
| 90  | CD44    | ENSG00000026508   |
| 91  | MET     | ENSG00000105976   |
| 92  | JAG2    | ENSG00000184916   |
| 93  | DLL3    | ENSG00000090932   |
| 94  | DLL4    | ENSG00000128917   |
| 95  | NOTCH1  | ENSG00000148400   |
| 96  | NOTCH2  | ENSG00000134250   |
| 97  | NOTCH3  | ENSG00000074181   |
| 98  | NOTCH4  | ENSG00000204301   |
| 99  | IHH     | ENSG00000163501   |
| 100 | PTCH1   | ENSG00000185920   |
| 101 | PTCH2   | ENSG00000117425   |
| 102 | SMO     | ENSG00000128602   |
| 103 | GLI1    | ENSG00000111087   |
| 104 | GLI2    | ENSG00000074047   |
| 105 | GLI3    | ENSG00000106571   |
| 106 | CTNNB1  | ENSG00000168036   |
| 107 | WNT1    | ENSG00000125084   |
| 108 | FZD5    | ENSG00000163251   |
| 109 | FZD4    | ENSG00000174804   |
| 110 | FZD6    | ENSG00000164930   |
| 111 | FZD8    | ENSG00000177283   |
| 112 | SNAI1   | ENSG00000124216   |
| 113 | SNAI2   | ENSG00000019549   |
| 114 | SNAI3   | ENSG00000185669   |
