# Supplementary material for: Transcriptomic and functional analysis of ANGPTL4 overexpression in pancreatic cancer nominates targets that reverse chemoresistance
Source: Springer Nature journal article supplement (doi:10.1186/s12885-023-11010-1), 2023-06-08
Supplement: MOESM6 [file 25464062]

Supplementary Table 4: AMIGO2 Panther GO biological process EMT results for with or without gemcitabine analysis

| #  | Gene ID                           | Mapped IDs | Gene name                                                      | Panther Family/Subfamily                                                         | Panther Protein Class             | Species      | Genes from Gemcitabine Treatment DEG List |
|----|-----------------------------------|------------|----------------------------------------------------------------|----------------------------------------------------------------------------------|-----------------------------------|--------------|-------------------------------------------|
| 1  | HUMAN HGNC=3372 UniProtKB=O95936  | EOMES      | Eomesodermin homolog                                           | EOMESODERMIN HOMOLOG (PTHR11267:SF13)                                            | Rel homology transcription factor | Homo sapiens | Yes                                       |
| 2  | HUMAN HGNC=11269 UniProtKB=O43609 | SPRY1      | Protein sprouty homolog 1                                      | PROTEIN SPROUTY HOMOLOG 1 (PTHR12365:SF10)                                       | scaffold/adaptor protein          | Homo sapiens | Yes                                       |
| 3  | HUMAN HGNC=11774 UniProtKB=Q03167 | TGFB3      | Transforming growth factor beta receptor type 3                | TRANSFORMING GROWTH FACTOR BETA RECEPTOR TYPE 3 (PTHR14002:SF7)                  | transmembrane signal receptor     | Homo sapiens | Yes                                       |
| 4  | HUMAN HGNC=11654 UniProtKB=Q13428 | TCOF1      | Treacle protein                                                | TREACLE PROTEIN (PTHR20787:SF10)                                                 | RNA metabolism protein            | Homo sapiens | Yes                                       |
| 5  | HUMAN HGNC=3688 UniProtKB=P11362  | FGFR1      | Fibroblast growth factor receptor 1                            | FIBROBLAST GROWTH FACTOR RECEPTOR 1 (PTHR24416:SF131)                            | transmembrane signal receptor     | Homo sapiens | Yes                                       |
| 6  | HUMAN HGNC=20861 UniProtKB=Q9ULF5 | SLC39A10   | Zinc transporter ZIP10                                         | ZINC TRANSPORTER ZIP10 (PTHR12191:SF14)                                          | secondary carrier transporter     | Homo sapiens | Yes                                       |
| 7  | HUMAN HGNC=11204 UniProtKB=P48436 | SOX9       | Transcription factor SOX-9                                     | TRANSCRIPTION FACTOR SOX-9 (PTHR45803:SF1)                                       | -                                 | Homo sapiens | Yes                                       |
| 8  | HUMAN HGNC=10776 UniProtKB=Q8N474 | SFRP1      | Secreted frizzled-related protein 1                            | SECRETED FRIZZLED-RELATED PROTEIN 1 (PTHR11309:SF87)                             | transmembrane signal receptor     | Homo sapiens | Yes                                       |
| 9  | HUMAN HGNC=7866 UniProtKB=Q13253  | NOG        | Noggin                                                         | NOGGIN (PTHR10494:SF5)                                                           | intercellular signal molecule     | Homo sapiens | Yes                                       |
| 10 | HUMAN HGNC=7881 UniProtKB=P46531  | NOTCH1     | Neurogenic locus notch homolog protein 1                       | NEUROGENIC LOCUS NOTCH HOMOLOG PROTEIN 1 (PTHR45836:SF12)                        | -                                 | Homo sapiens | Yes                                       |
| 11 | HUMAN HGNC=3176 UniProtKB=P05305  | EDN1       | Endothelin-1                                                   | ENDOTHELIN-1 (PTHR13874:SF10)                                                    | peptide hormone                   | Homo sapiens | Yes                                       |
| 12 | HUMAN HGNC=193 UniProtKB=Q13444   | ADAM15     | Disintegrin and metalloproteinase domain-containing protein 15 | DISINTEGRIN AND METALLOPROTEINASE DOMAIN-CONTAINING PROTEIN 15 (PTHR11905:SF130) | metalloprotease                   | Homo sapiens | Yes                                       |
| 1  | HUMAN HGNC=3372 UniProtKB=O95936  | EOMES      | Eomesodermin homolog                                           | EOMESODERMIN HOMOLOG (PTHR11267:SF13)                                            | Rel homology transcription factor | Homo sapiens | No                                        |
| 2  | HUMAN HGNC=5034 UniProtKB=Q99729  | HNRNPAB    | Heterogeneous nuclear ribonucleoprotein A/B                    | HETEROGENEOUS NUCLEAR RIBONUCLEOPROTEIN A/B (PTHR48033:SF1)                      | RNA metabolism protein            | Homo sapiens | No                                        |
| 3  | HUMAN HGNC=11269 UniProtKB=O43609 | SPRY1      | Protein sprouty homolog 1                                      | PROTEIN SPROUTY HOMOLOG 1 (PTHR12365:SF10)                                       | scaffold/adaptor protein          | Homo sapiens | No                                        |
| 4  | HUMAN HGNC=11774 UniProtKB=Q03167 | TGFB3      | Transforming growth factor beta receptor type 3                | TRANSFORMING GROWTH FACTOR BETA RECEPTOR TYPE 3 (PTHR14002:SF7)                  | transmembrane signal receptor     | Homo sapiens | No                                        |
| 5  | HUMAN HGNC=4186 UniProtKB=P52951  | GBX2       | Homeobox protein GBX-2                                         | HOMEODOMAIN PROTEIN GBX-2 (PTHR24334:SF3)                                        | homeodomain transcription factor  | Homo sapiens | No                                        |
| 6  | HUMAN HGNC=16122 UniProtKB=Q9H4H8 | FAM83D     | Protein FAM83D                                                 | PROTEIN FAM83B-RELATED (PTHR16181:SF28)                                          | -                                 | Homo sapiens | No                                        |
| 7  | HUMAN HGNC=10494 UniProtKB=P26447 | S100A4     | Protein S100-A4                                                | PROTEIN S100-A4 (PTHR11639:SF51)                                                 | calmodulin-related                | Homo sapiens | No                                        |
| 8  | HUMAN HGNC=11654 UniProtKB=Q13428 | TCOF1      | Treacle protein                                                | TREACLE PROTEIN (PTHR20787:SF10)                                                 | RNA metabolism protein            | Homo sapiens | No                                        |
| 9  | HUMAN HGNC=24042 UniProtKB=Q9GZV5 | WWTR1      | WW domain-containing transcription regulator protein 1         | WW DOMAIN-CONTAINING TRANSCRIPTION REGULATOR PROTEIN 1 (PTHR17616:SF6)           | transcription cofactor            | Homo sapiens | No                                        |
| 10 | HUMAN HGNC=11203 UniProtKB=P57073 | SOX8       | Transcription factor SOX-8                                     | TRANSCRIPTION FACTOR SOX-8 (PTHR45803:SF2)                                       | -                                 | Homo sapiens | No                                        |
| 11 | HUMAN HGNC=3688 UniProtKB=P11362  | FGFR1      | Fibroblast growth factor receptor 1                            | FIBROBLAST GROWTH FACTOR RECEPTOR 1 (PTHR24416:SF131)                            | transmembrane signal receptor     | Homo sapiens | No                                        |
| 12 | HUMAN HGNC=20861 UniProtKB=Q9ULF5 | SLC39A10   | Zinc transporter ZIP10                                         | ZINC TRANSPORTER ZIP10 (PTHR12191:SF14)                                          | secondary carrier transporter     | Homo sapiens | No                                        |
| 13 | HUMAN HGNC=11204 UniProtKB=P48436 | SOX9       | Transcription factor SOX-9                                     | TRANSCRIPTION FACTOR SOX-9 (PTHR45803:SF1)                                       | -                                 | Homo sapiens | No                                        |
| 14 | HUMAN HGNC=10776 UniProtKB=Q8N474 | SFRP1      | Secreted frizzled-related protein 1                            | SECRETED FRIZZLED-RELATED PROTEIN 1 (PTHR11309:SF87)                             | transmembrane signal receptor     | Homo sapiens | No                                        |
| 15 | HUMAN HGNC=1987 UniProtKB=Q99967  | CITED2     | Cbp/p300-interacting transactivator 2                          | CBP/P300-INTERACTING TRANSACTIVATOR 2 (PTHR17045:SF7)                            | transcription cofactor            | Homo sapiens | No                                        |
| 16 | HUMAN HGNC=21024 UniProtKB=Q14999 | CUL7       | Cullin-7                                                       | CULLIN-7 (PTHR22771:SF3)                                                         | -                                 | Homo sapiens | No                                        |
| 17 | HUMAN HGNC=10723 UniProtKB=Q14563 | SEMA3A     | Semaphorin-3A                                                  | SEMAPHORIN-3A (PTHR11036:SF23)                                                   | membrane-bound signaling molecule | Homo sapiens | No                                        |
| 18 | HUMAN HGNC=11362 UniProtKB=P42224 | STAT1      | Signal transducer and activator of transcription 1-alpha/beta  | SIGNAL TRANSDUCER AND ACTIVATOR OF TRANSCRIPTION 1-ALPHA/BETA (PTHR11801:SF18)   | DNA-binding transcription factor  | Homo sapiens | No                                        |
| 19 | HUMAN HGNC=10725 UniProtKB=Q99985 | SEMA3C     | Semaphorin-3C                                                  | SEMAPHORIN-3C (PTHR11036:SF25)                                                   | membrane-bound signaling molecule | Homo sapiens | No                                        |
| 20 | HUMAN HGNC=7881 UniProtKB=P46531  | NOTCH1     | Neurogenic locus notch homolog protein 1                       | NEUROGENIC LOCUS NOTCH HOMOLOG PROTEIN 1 (PTHR45836:SF12)                        | -                                 | Homo sapiens | No                                        |
| 21 | HUMAN HGNC=11766 UniProtKB=P01137 | TGFB1      | Transforming growth factor beta-1 proprotein                   | TRANSFORMING GROWTH FACTOR BETA-1 PROPROTEIN (PTHR11848:SF125)                   | growth factor                     | Homo sapiens | No                                        |
| 22 | HUMAN HGNC=3512 UniProtKB=Q16394  | EXT1       | Exostosin-1                                                    | EXOSTOSIN-1 (PTHR11062:SF97)                                                     | glycosyltransferase               | Homo sapiens | No                                        |
