# Supplementary material for: Transcriptomic and functional analysis of ANGPTL4 overexpression in pancreatic cancer nominates targets that reverse chemoresistance
Source: Springer Nature journal article supplement (doi:10.1186/s12885-023-11010-1), 2023-06-08
Supplement: MOESM7 [file 25464062]

Supplementary Table 5: AMIGO2 Panther GO biological process complete analysis for DEG retrieved from with or without gemcitabine analysis

Analysis Type: PANTHER Overrepresentation Test (Released 20221013)

Annotation Version and Release Date: GO Ontology database DOI: 10.5281/zenodo.7709866 Released 2023-03-06

Analyzed List: upload\_1 (Homo sapiens)

Reference List: Homo sapiens (all genes in database)

Test Type: FISHER

Correction: FDR

| GO biological process complete                                 | Homo sapiens REFLIST (20589) | upload_1 (941) | upload_1 (expected) | upload_1 (over/under) | upload_1 (fold Enrichment) | upload_1 (raw P-value) | upload_1 (FDR) | Genes from Gemcitabine Treatment DEG List |
|----------------------------------------------------------------|------------------------------|----------------|---------------------|-----------------------|----------------------------|------------------------|----------------|-------------------------------------------|
| biological_process (GO:0008150)                                | 17752                        | 877            | 811.34              | +                     | 1.08                       | 4.45E-11               | 2.24E-08       | yes                                       |
| cellular process (GO:0009987)                                  | 14600                        | 757            | 667.28              | +                     | 1.13                       | 7.36E-11               | 3.38E-08       | yes                                       |
| biological regulation (GO:0065007)                             | 12190                        | 675            | 557.13              | +                     | 1.21                       | 6.77E-15               | 7.05E-12       | yes                                       |
| regulation of biological process (GO:0050789)                  | 11772                        | 668            | 538.03              | +                     | 1.24                       | 1.58E-17               | 1.23E-13       | yes                                       |
| regulation of cellular process (GO:0050794)                    | 11006                        | 633            | 503.02              | +                     | 1.26                       | 4.20E-17               | 1.31E-13       | yes                                       |
| response to stimulus (GO:0050896)                              | 8196                         | 462            | 374.59              | +                     | 1.23                       | 1.88E-08               | 3.81E-06       | yes                                       |
| metabolic process (GO:0008152)                                 | 8105                         | 423            | 370.43              | +                     | 1.14                       | 7.33E-04               | 2.75E-02       | yes                                       |
| regulation of metabolic process (GO:0019222)                   | 6681                         | 412            | 305.35              | +                     | 1.35                       | 1.39E-12               | 1.03E-09       | yes                                       |
| positive regulation of biological process (GO:0048518)         | 6234                         | 412            | 284.92              | +                     | 1.45                       | 1.89E-17               | 9.84E-14       | yes                                       |
| regulation of macromolecule metabolic process (GO:0060255)     | 6162                         | 388            | 281.63              | +                     | 1.38                       | 7.46E-13               | 6.46E-10       | yes                                       |
| primary metabolic process (GO:0044238)                         | 7199                         | 385            | 329.02              | +                     | 1.17                       | 2.15E-04               | 1.03E-02       | yes                                       |
| positive regulation of cellular process (GO:0048522)           | 5523                         | 378            | 252.42              | +                     | 1.5                        | 4.93E-18               | 7.69E-14       | yes                                       |
| cellular response to stimulus (GO:0051716)                     | 6443                         | 376            | 294.47              | +                     | 1.28                       | 4.74E-08               | 8.60E-06       | yes                                       |
| developmental process (GO:0032502)                             | 5732                         | 376            | 261.98              | +                     | 1.44                       | 5.77E-15               | 6.43E-12       | yes                                       |
| multicellular organismal process (GO:0032501)                  | 6712                         | 375            | 306.77              | +                     | 1.22                       | 5.41E-06               | 5.25E-04       | yes                                       |
| negative regulation of biological process (GO:0048519)         | 5336                         | 364            | 243.88              | +                     | 1.49                       | 5.99E-17               | 1.56E-13       | yes                                       |
| regulation of primary metabolic process (GO:0080090)           | 5797                         | 363            | 264.95              | +                     | 1.37                       | 2.02E-11               | 1.05E-08       | yes                                       |
| nitrogen compound metabolic process (GO:0006807)               | 6649                         | 358            | 303.89              | +                     | 1.18                       | 2.81E-04               | 1.27E-02       | yes                                       |
| regulation of nitrogen compound metabolic process (GO:0051171) | 5624                         | 356            | 257.04              | +                     | 1.39                       | 7.96E-12               | 5.17E-09       | yes                                       |
| anatomical structure development (GO:0048856)                  | 5193                         | 350            | 237.34              | +                     | 1.47                       | 2.72E-15               | 4.25E-12       | yes                                       |
| cellular component organization or biogenesis (GO:0071840)     | 5700                         | 344            | 260.51              | +                     | 1.32                       | 8.05E-09               | 1.77E-06       | yes                                       |
| regulation of cellular metabolic process (GO:0031323)          | 5447                         | 338            | 248.95              | +                     | 1.36                       | 4.79E-10               | 1.63E-07       | yes                                       |
| cellular component organization (GO:0016043)                   | 5497                         | 338            | 251.23              | +                     | 1.35                       | 1.39E-09               | 3.73E-07       | yes                                       |
| negative regulation of cellular process (GO:0048523)           | 4735                         | 326            | 216.41              | +                     | 1.51                       | 3.39E-15               | 4.81E-12       | yes                                       |
| cellular metabolic process (GO:0044237)                        | 5808                         | 312            | 265.45              | +                     | 1.18                       | 1.14E-03               | 3.78E-02       | yes                                       |

|                                                                             |      |     |        |   |      |          |          |     |
|-----------------------------------------------------------------------------|------|-----|--------|---|------|----------|----------|-----|
| cell communication (GO:0007154)                                             | 5244 | 311 | 239.67 | + | 1.3  | 3.84E-07 | 5.21E-05 | yes |
| signaling (GO:0023052)                                                      | 5081 | 305 | 232.22 | + | 1.31 | 1.90E-07 | 2.85E-05 | yes |
| signal transduction (GO:0007165)                                            | 4783 | 289 | 218.6  | + | 1.32 | 3.04E-07 | 4.20E-05 | yes |
| regulation of gene expression (GO:0010468)                                  | 4847 | 288 | 221.53 | + | 1.3  | 1.42E-06 | 1.70E-04 | yes |
| regulation of response to stimulus (GO:0048583)                             | 3954 | 285 | 180.71 | + | 1.58 | 2.05E-15 | 3.56E-12 | yes |
| multicellular organism development (GO:0007275)                             | 3969 | 275 | 181.4  | + | 1.52 | 7.95E-13 | 6.53E-10 | yes |
| positive regulation of metabolic process (GO:0009893)                       | 3834 | 263 | 175.23 | + | 1.5  | 1.12E-11 | 6.45E-09 | yes |
| regulation of cell communication (GO:0010646)                               | 3402 | 256 | 155.49 | + | 1.65 | 1.10E-15 | 2.14E-12 | yes |
| regulation of signaling (GO:0023051)                                        | 3393 | 253 | 155.07 | + | 1.63 | 4.47E-15 | 5.37E-12 | yes |
| system development (GO:0048731)                                             | 3553 | 248 | 162.39 | + | 1.53 | 9.55E-12 | 5.73E-09 | yes |
| positive regulation of macromolecule metabolic process (GO:0010604)         | 3524 | 248 | 161.06 | + | 1.54 | 4.34E-12 | 3.08E-09 | yes |
| regulation of biosynthetic process (GO:0009889)                             | 4135 | 242 | 188.99 | + | 1.28 | 4.76E-05 | 3.00E-03 | yes |
| response to stress (GO:0006950)                                             | 3407 | 237 | 155.71 | + | 1.52 | 5.02E-11 | 2.37E-08 | yes |
| regulation of nucleobase-containing compound metabolic process (GO:0019219) | 4016 | 237 | 183.55 | + | 1.29 | 3.28E-05 | 2.24E-03 | yes |
| regulation of cellular biosynthetic process (GO:0031326)                    | 4026 | 235 | 184    | + | 1.28 | 6.90E-05 | 3.94E-03 | yes |
| cellular developmental process (GO:0048869)                                 | 3599 | 233 | 164.49 | + | 1.42 | 4.54E-08 | 8.33E-06 | yes |
| cell differentiation (GO:0030154)                                           | 3575 | 232 | 163.39 | + | 1.42 | 4.18E-08 | 7.76E-06 | yes |
| response to chemical (GO:0042221)                                           | 3899 | 231 | 178.2  | + | 1.3  | 3.24E-05 | 2.23E-03 | yes |
| regulation of macromolecule biosynthetic process (GO:0010556)               | 3917 | 230 | 179.02 | + | 1.28 | 5.81E-05 | 3.46E-03 | yes |
| regulation of signal transduction (GO:0009966)                              | 2990 | 229 | 136.66 | + | 1.68 | 1.05E-14 | 1.03E-11 | yes |
| positive regulation of nitrogen compound metabolic process (GO:0051173)     | 3128 | 221 | 142.96 | + | 1.55 | 9.23E-11 | 4.00E-08 | yes |
| animal organ development (GO:0048513)                                       | 2925 | 220 | 133.68 | + | 1.65 | 2.45E-13 | 2.25E-10 | yes |
| regulation of RNA metabolic process (GO:0051252)                            | 3727 | 217 | 170.34 | + | 1.27 | 1.75E-04 | 8.60E-03 | yes |
| regulation of molecular function (GO:0065009)                               | 2567 | 214 | 117.32 | + | 1.82 | 2.81E-17 | 1.10E-13 | yes |
| regulation of multicellular organismal process (GO:0051239)                 | 2980 | 210 | 136.2  | + | 1.54 | 3.50E-10 | 1.30E-07 | yes |
| positive regulation of cellular metabolic process (GO:0031325)              | 2971 | 207 | 135.79 | + | 1.52 | 1.46E-09 | 3.79E-07 | yes |
| regulation of RNA biosynthetic process (GO:2001141)                         | 3431 | 206 | 156.81 | + | 1.31 | 4.99E-05 | 3.09E-03 | yes |
| regulation of DNA-templated transcription (GO:0006355)                      | 3406 | 205 | 155.67 | + | 1.32 | 4.73E-05 | 3.00E-03 | yes |
| regulation of nucleic acid-templated transcription (GO:1903506)             | 3408 | 205 | 155.76 | + | 1.32 | 4.76E-05 | 3.01E-03 | yes |
| regulation of cellular component organization (GO:0051128)                  | 2445 | 199 | 111.75 | + | 1.78 | 4.14E-15 | 5.39E-12 | yes |
| organelle organization (GO:0006996)                                         | 3050 | 195 | 139.4  | + | 1.4  | 1.89E-06 | 2.17E-04 | yes |
| negative regulation of metabolic process (GO:0009892)                       | 2976 | 193 | 136.02 | + | 1.42 | 9.13E-07 | 1.18E-04 | yes |
| regulation of developmental process (GO:0050793)                            | 2460 | 188 | 112.43 | + | 1.67 | 7.16E-12 | 4.86E-09 | yes |
| response to organic substance (GO:0010033)                                  | 2590 | 186 | 118.37 | + | 1.57 | 1.40E-09 | 3.69E-07 | yes |

|                                                                                      |      |     |        |   |      |          |          |     |
|--------------------------------------------------------------------------------------|------|-----|--------|---|------|----------|----------|-----|
| negative regulation of macromolecule metabolic process (GO:0010605)                  | 2746 | 185 | 125.5  | + | 1.47 | 1.36E-07 | 2.12E-05 | yes |
| regulation of protein metabolic process (GO:0051246)                                 | 2486 | 182 | 113.62 | + | 1.6  | 5.19E-10 | 1.72E-07 | yes |
| anatomical structure morphogenesis (GO:0009653)                                      | 2233 | 178 | 102.06 | + | 1.74 | 1.25E-12 | 9.73E-10 | yes |
| regulation of catalytic activity (GO:0050790)                                        | 1825 | 167 | 83.41  | + | 2    | 1.01E-16 | 2.26E-13 | yes |
| response to external stimulus (GO:0009605)                                           | 2410 | 167 | 110.15 | + | 1.52 | 1.40E-07 | 2.15E-05 | yes |
| positive regulation of response to stimulus (GO:0048584)                             | 2197 | 165 | 100.41 | + | 1.64 | 6.70E-10 | 2.13E-07 | yes |
| macromolecule modification (GO:0043412)                                              | 2796 | 165 | 127.79 | + | 1.29 | 8.25E-04 | 3.01E-02 | yes |
| negative regulation of nitrogen compound metabolic process (GO:0051172)              | 2375 | 158 | 108.55 | + | 1.46 | 2.99E-06 | 3.07E-04 | yes |
| protein modification process (GO:0036211)                                            | 2573 | 156 | 117.6  | + | 1.33 | 3.67E-04 | 1.61E-02 | yes |
| cellular response to chemical stimulus (GO:0070887)                                  | 2405 | 154 | 109.92 | + | 1.4  | 3.56E-05 | 2.40E-03 | yes |
| cell development (GO:0048468)                                                        | 2169 | 151 | 99.13  | + | 1.52 | 5.02E-07 | 6.70E-05 | yes |
| nervous system development (GO:0007399)                                              | 2222 | 150 | 101.55 | + | 1.48 | 2.60E-06 | 2.72E-04 | yes |
| macromolecule localization (GO:0033036)                                              | 2368 | 149 | 108.23 | + | 1.38 | 9.68E-05 | 5.27E-03 | yes |
| regulation of transcription by RNA polymerase II (GO:0006357)                        | 2418 | 147 | 110.51 | + | 1.33 | 5.50E-04 | 2.23E-02 | yes |
| tissue development (GO:0009888)                                                      | 1745 | 145 | 79.75  | + | 1.82 | 1.69E-11 | 9.08E-09 | yes |
| regulation of localization (GO:0032879)                                              | 2133 | 144 | 97.49  | + | 1.48 | 4.82E-06 | 4.80E-04 | yes |
| positive regulation of biosynthetic process (GO:0009891)                             | 2073 | 144 | 94.74  | + | 1.52 | 9.57E-07 | 1.22E-04 | yes |
| regulation of cell population proliferation (GO:0042127)                             | 1676 | 141 | 76.6   | + | 1.84 | 1.17E-11 | 6.50E-09 | yes |
| immune system process (GO:0002376)                                                   | 2256 | 140 | 103.11 | + | 1.36 | 3.06E-04 | 1.37E-02 | yes |
| negative regulation of cellular metabolic process (GO:0031324)                       | 2214 | 139 | 101.19 | + | 1.37 | 2.18E-04 | 1.04E-02 | yes |
| regulation of intracellular signal transduction (GO:1902531)                         | 1727 | 137 | 78.93  | + | 1.74 | 1.08E-09 | 3.06E-07 | yes |
| positive regulation of cellular biosynthetic process (GO:0031328)                    | 2014 | 137 | 92.05  | + | 1.49 | 6.11E-06 | 5.82E-04 | yes |
| positive regulation of cell communication (GO:0010647)                               | 1729 | 137 | 79.02  | + | 1.73 | 1.12E-09 | 3.11E-07 | yes |
| positive regulation of nucleobase-containing compound metabolic process (GO:0045935) | 2044 | 137 | 93.42  | + | 1.47 | 1.18E-05 | 1.02E-03 | yes |
| positive regulation of signaling (GO:0023056)                                        | 1728 | 136 | 78.98  | + | 1.72 | 2.24E-09 | 5.37E-07 | yes |
| cellular response to organic substance (GO:0071310)                                  | 1776 | 134 | 81.17  | + | 1.65 | 2.98E-08 | 5.81E-06 | yes |
| positive regulation of macromolecule biosynthetic process (GO:0010557)               | 1934 | 133 | 88.39  | + | 1.5  | 5.41E-06 | 5.28E-04 | yes |
| cell surface receptor signaling pathway (GO:0007166)                                 | 2087 | 130 | 95.38  | + | 1.36 | 5.31E-04 | 2.17E-02 | yes |
| regulation of cell differentiation (GO:0045595)                                      | 1556 | 127 | 71.12  | + | 1.79 | 1.17E-09 | 3.19E-07 | yes |
| regulation of protein modification process (GO:0031399)                              | 1471 | 126 | 67.23  | + | 1.87 | 7.85E-11 | 3.50E-08 | yes |
| phosphorus metabolic process (GO:0006793)                                            | 1841 | 125 | 84.14  | + | 1.49 | 1.73E-05 | 1.33E-03 | yes |
| intracellular signal transduction (GO:0035556)                                       | 1520 | 125 | 69.47  | + | 1.8  | 8.19E-10 | 2.51E-07 | yes |
| phosphate-containing compound metabolic process (GO:0006796)                         | 1815 | 124 | 82.95  | + | 1.49 | 1.51E-05 | 1.19E-03 | yes |

|                                                                                        |      |     |       |   |      |          |          |     |
|----------------------------------------------------------------------------------------|------|-----|-------|---|------|----------|----------|-----|
| positive regulation of signal transduction (GO:0009967)                                | 1551 | 123 | 70.89 | + | 1.74 | 1.09E-08 | 2.30E-06 | yes |
| positive regulation of molecular function (GO:0044093)                                 | 1517 | 123 | 69.33 | + | 1.77 | 2.58E-09 | 6.09E-07 | yes |
| regulation of transport (GO:0051049)                                                   | 1776 | 122 | 81.17 | + | 1.5  | 1.27E-05 | 1.09E-03 | yes |
| positive regulation of RNA metabolic process (GO:0051254)                              | 1847 | 121 | 84.42 | + | 1.43 | 1.27E-04 | 6.60E-03 | yes |
| regulation of cell death (GO:0010941)                                                  | 1668 | 121 | 76.23 | + | 1.59 | 1.19E-06 | 1.45E-04 | yes |
| regulation of multicellular organismal development (GO:2000026)                        | 1399 | 120 | 63.94 | + | 1.88 | 1.74E-10 | 6.98E-08 | yes |
| positive regulation of RNA biosynthetic process (GO:1902680)                           | 1714 | 118 | 78.34 | + | 1.51 | 2.03E-05 | 1.51E-03 | yes |
| positive regulation of nucleic acid-templated transcription (GO:1903508)               | 1707 | 118 | 78.02 | + | 1.51 | 1.51E-05 | 1.20E-03 | yes |
| positive regulation of DNA-templated transcription (GO:0045893)                        | 1707 | 118 | 78.02 | + | 1.51 | 1.51E-05 | 1.20E-03 | yes |
| positive regulation of multicellular organismal process (GO:0051240)                   | 1653 | 116 | 75.55 | + | 1.54 | 8.69E-06 | 7.75E-04 | yes |
| response to oxygen-containing compound (GO:1901700)                                    | 1679 | 114 | 76.74 | + | 1.49 | 4.91E-05 | 3.05E-03 | yes |
| positive regulation of protein metabolic process (GO:0051247)                          | 1446 | 113 | 66.09 | + | 1.71 | 1.05E-07 | 1.66E-05 | yes |
| regulation of phosphorus metabolic process (GO:0051174)                                | 1323 | 113 | 60.47 | + | 1.87 | 8.11E-10 | 2.53E-07 | yes |
| regulation of phosphate metabolic process (GO:0019220)                                 | 1322 | 112 | 60.42 | + | 1.85 | 1.76E-09 | 4.36E-07 | yes |
| negative regulation of response to stimulus (GO:0048585)                               | 1640 | 112 | 74.95 | + | 1.49 | 4.13E-05 | 2.68E-03 | yes |
| regulation of programmed cell death (GO:0043067)                                       | 1510 | 112 | 69.01 | + | 1.62 | 1.35E-06 | 1.63E-04 | yes |
| regulation of response to stress (GO:0080134)                                          | 1451 | 112 | 66.32 | + | 1.69 | 2.21E-07 | 3.29E-05 | yes |
| cellular response to stress (GO:0033554)                                               | 1610 | 110 | 73.58 | + | 1.49 | 4.68E-05 | 2.98E-03 | yes |
| cell cycle (GO:0007049)                                                                | 1267 | 110 | 57.91 | + | 1.9  | 5.78E-10 | 1.88E-07 | yes |
| negative regulation of biosynthetic process (GO:0009890)                               | 1638 | 108 | 74.86 | + | 1.44 | 2.36E-04 | 1.10E-02 | yes |
| regulation of apoptotic process (GO:0042981)                                           | 1466 | 108 | 67    | + | 1.61 | 2.58E-06 | 2.72E-04 | yes |
| negative regulation of cellular biosynthetic process (GO:0031327)                      | 1589 | 107 | 72.62 | + | 1.47 | 1.17E-04 | 6.24E-03 | yes |
| negative regulation of nucleobase-containing compound metabolic process (GO:0045934)   | 1560 | 107 | 71.3  | + | 1.5  | 6.07E-05 | 3.59E-03 | yes |
| biological process involved in interspecies interaction between organisms (GO:0044419) | 1542 | 106 | 70.48 | + | 1.5  | 5.58E-05 | 3.38E-03 | yes |
| regulation of immune system process (GO:0002682)                                       | 1480 | 105 | 67.64 | + | 1.55 | 1.73E-05 | 1.33E-03 | yes |
| negative regulation of macromolecule biosynthetic process (GO:0010558)                 | 1547 | 104 | 70.7  | + | 1.47 | 1.60E-04 | 8.00E-03 | yes |
| regulation of cell cycle (GO:0051726)                                                  | 1120 | 102 | 51.19 | + | 1.99 | 3.20E-10 | 1.22E-07 | yes |
| regulation of phosphorylation (GO:0042325)                                             | 1177 | 102 | 53.79 | + | 1.9  | 3.18E-09 | 7.40E-07 | yes |
| positive regulation of developmental process (GO:0051094)                              | 1314 | 101 | 60.06 | + | 1.68 | 1.06E-06 | 1.33E-04 | yes |
| regulation of organelle organization (GO:0033043)                                      | 1176 | 99  | 53.75 | + | 1.84 | 2.54E-08 | 5.01E-06 | yes |
| response to biotic stimulus (GO:0009607)                                               | 1411 | 99  | 64.49 | + | 1.54 | 4.79E-05 | 3.00E-03 | yes |
| defense response (GO:0006952)                                                          | 1417 | 98  | 64.76 | + | 1.51 | 8.65E-05 | 4.74E-03 | yes |
| regulation of protein phosphorylation (GO:0001932)                                     | 1079 | 97  | 49.31 | + | 1.97 | 1.67E-09 | 4.27E-07 | yes |

|                                                                          |      |    |       |   |      |          |          |     |
|--------------------------------------------------------------------------|------|----|-------|---|------|----------|----------|-----|
| response to other organism (GO:0051707)                                  | 1363 | 97 | 62.29 | + | 1.56 | 3.59E-05 | 2.40E-03 | yes |
| negative regulation of RNA metabolic process (GO:0051253)                | 1441 | 97 | 65.86 | + | 1.47 | 2.73E-04 | 1.25E-02 | yes |
| response to external biotic stimulus (GO:0043207)                        | 1366 | 97 | 62.43 | + | 1.55 | 3.69E-05 | 2.41E-03 | yes |
| negative regulation of RNA biosynthetic process (GO:1902679)             | 1330 | 96 | 60.79 | + | 1.58 | 2.19E-05 | 1.60E-03 | yes |
| positive regulation of catalytic activity (GO:0043085)                   | 1110 | 96 | 50.73 | + | 1.89 | 1.07E-08 | 2.28E-06 | yes |
| negative regulation of nucleic acid-templated transcription (GO:1903507) | 1316 | 96 | 60.15 | + | 1.6  | 1.47E-05 | 1.18E-03 | yes |
| negative regulation of DNA-templated transcription (GO:0045892)          | 1315 | 96 | 60.1  | + | 1.6  | 1.46E-05 | 1.18E-03 | yes |
| regulation of locomotion (GO:0040012)                                    | 1034 | 94 | 47.26 | + | 1.99 | 2.01E-09 | 4.90E-07 | yes |
| regulation of cell motility (GO:2000145)                                 | 989  | 92 | 45.2  | + | 2.04 | 8.93E-10 | 2.63E-07 | yes |
| positive regulation of cellular component organization (GO:0051130)      | 1122 | 92 | 51.28 | + | 1.79 | 2.25E-07 | 3.28E-05 | yes |
| epithelium development (GO:0060429)                                      | 1098 | 91 | 50.18 | + | 1.81 | 1.69E-07 | 2.56E-05 | yes |
| neurogenesis (GO:0022008)                                                | 1310 | 90 | 59.87 | + | 1.5  | 2.45E-04 | 1.13E-02 | yes |
| cytoskeleton organization (GO:0007010)                                   | 1247 | 89 | 56.99 | + | 1.56 | 7.48E-05 | 4.24E-03 | yes |
| positive regulation of transcription by RNA polymerase II (GO:0045944)   | 1256 | 89 | 57.4  | + | 1.55 | 8.16E-05 | 4.52E-03 | yes |
| regulation of cell migration (GO:0030334)                                | 930  | 88 | 42.5  | + | 2.07 | 8.34E-10 | 2.50E-07 | yes |
| animal organ morphogenesis (GO:0009887)                                  | 989  | 86 | 45.2  | + | 1.9  | 5.84E-08 | 1.03E-05 | yes |
| cell death (GO:0008219)                                                  | 1122 | 86 | 51.28 | + | 1.68 | 8.49E-06 | 7.66E-04 | yes |
| cell cycle process (GO:0022402)                                          | 878  | 86 | 40.13 | + | 2.14 | 2.75E-10 | 1.07E-07 | yes |
| regulation of response to external stimulus (GO:0032101)                 | 1058 | 85 | 48.35 | + | 1.76 | 1.58E-06 | 1.86E-04 | yes |
| embryo development (GO:0009790)                                          | 1056 | 85 | 48.26 | + | 1.76 | 1.54E-06 | 1.82E-04 | yes |
| regulation of transferase activity (GO:0051338)                          | 851  | 84 | 38.89 | + | 2.16 | 3.97E-10 | 1.41E-07 | yes |
| programmed cell death (GO:0012501)                                       | 1088 | 84 | 49.73 | + | 1.69 | 8.84E-06 | 7.84E-04 | yes |
| response to abiotic stimulus (GO:0009628)                                | 1117 | 84 | 51.05 | + | 1.65 | 2.21E-05 | 1.59E-03 | yes |
| tube development (GO:0035295)                                            | 897  | 84 | 41    | + | 2.05 | 3.27E-09 | 7.50E-07 | yes |
| regulation of anatomical structure morphogenesis (GO:0022603)            | 871  | 84 | 39.81 | + | 2.11 | 1.06E-09 | 3.07E-07 | yes |
| apoptotic process (GO:0006915)                                           | 1045 | 83 | 47.76 | + | 1.74 | 2.99E-06 | 3.09E-04 | yes |
| negative regulation of signal transduction (GO:0009968)                  | 1265 | 83 | 57.82 | + | 1.44 | 1.51E-03 | 4.80E-02 | yes |
| positive regulation of gene expression (GO:0010628)                      | 1184 | 83 | 54.11 | + | 1.53 | 2.17E-04 | 1.03E-02 | yes |
| positive regulation of cell population proliferation (GO:0008284)        | 952  | 83 | 43.51 | + | 1.91 | 8.37E-08 | 1.39E-05 | yes |
| regulation of cell development (GO:0060284)                              | 827  | 82 | 37.8  | + | 2.17 | 4.31E-10 | 1.49E-07 | yes |
| negative regulation of multicellular organismal process (GO:0051241)     | 1122 | 82 | 51.28 | + | 1.6  | 6.11E-05 | 3.60E-03 | yes |
| cellular response to oxygen-containing compound (GO:1901701)             | 1150 | 81 | 52.56 | + | 1.54 | 2.34E-04 | 1.09E-02 | yes |
| anatomical structure formation involved in morphogenesis (GO:0048646)    | 959  | 81 | 43.83 | + | 1.85 | 4.85E-07 | 6.52E-05 | yes |
| positive regulation of protein modification process (GO:0031401)         | 954  | 81 | 43.6  | + | 1.86 | 3.23E-07 | 4.42E-05 | yes |
| negative regulation of cell death (GO:0060548)                           | 1022 | 81 | 46.71 | + | 1.73 | 4.76E-06 | 4.76E-04 | yes |

|                                                                        |      |    |       |   |      |          |          |     |
|------------------------------------------------------------------------|------|----|-------|---|------|----------|----------|-----|
| positive regulation of intracellular signal transduction (GO:1902533)  | 1005 | 80 | 45.93 | + | 1.74 | 4.17E-06 | 4.19E-04 | yes |
| regulation of hydrolase activity (GO:0051336)                          | 966  | 80 | 44.15 | + | 1.81 | 1.19E-06 | 1.46E-04 | yes |
| positive regulation of cell differentiation (GO:0045597)               | 854  | 78 | 39.03 | + | 2    | 4.08E-08 | 7.66E-06 | yes |
| circulatory system development (GO:0072359)                            | 920  | 77 | 42.05 | + | 1.83 | 1.08E-06 | 1.35E-04 | yes |
| cell adhesion (GO:0007155)                                             | 960  | 77 | 43.88 | + | 1.75 | 5.29E-06 | 5.19E-04 | yes |
| negative regulation of molecular function (GO:0044092)                 | 985  | 77 | 45.02 | + | 1.71 | 1.38E-05 | 1.15E-03 | yes |
| defense response to other organism (GO:0098542)                        | 997  | 77 | 45.57 | + | 1.69 | 2.18E-05 | 1.60E-03 | yes |
| response to nitrogen compound (GO:1901698)                             | 1057 | 76 | 48.31 | + | 1.57 | 2.33E-04 | 1.10E-02 | yes |
| central nervous system development (GO:0007417)                        | 1055 | 74 | 48.22 | + | 1.53 | 5.44E-04 | 2.22E-02 | yes |
| negative regulation of transcription by RNA polymerase II (GO:0000122) | 987  | 74 | 45.11 | + | 1.64 | 7.65E-05 | 4.33E-03 | yes |
| cell motility (GO:0048870)                                             | 1040 | 72 | 47.53 | + | 1.51 | 8.71E-04 | 3.14E-02 | yes |
| regulation of cellular component biogenesis (GO:0044087)               | 967  | 72 | 44.2  | + | 1.63 | 1.24E-04 | 6.52E-03 | yes |
| negative regulation of programmed cell death (GO:0043069)              | 919  | 72 | 42    | + | 1.71 | 2.20E-05 | 1.59E-03 | yes |
| positive regulation of phosphorus metabolic process (GO:0010562)       | 848  | 72 | 38.76 | + | 1.86 | 2.01E-06 | 2.21E-04 | yes |
| positive regulation of phosphate metabolic process (GO:0045937)        | 848  | 72 | 38.76 | + | 1.86 | 2.01E-06 | 2.19E-04 | yes |
| regulation of kinase activity (GO:0043549)                             | 713  | 71 | 32.59 | + | 2.18 | 6.39E-09 | 1.42E-06 | yes |
| regulation of cell adhesion (GO:0030155)                               | 789  | 71 | 36.06 | + | 1.97 | 2.43E-07 | 3.44E-05 | yes |
| response to cytokine (GO:0034097)                                      | 817  | 70 | 37.34 | + | 1.87 | 2.00E-06 | 2.21E-04 | yes |
| cell migration (GO:0016477)                                            | 875  | 70 | 39.99 | + | 1.75 | 1.95E-05 | 1.46E-03 | yes |
| negative regulation of apoptotic process (GO:0043066)                  | 892  | 70 | 40.77 | + | 1.72 | 3.32E-05 | 2.24E-03 | yes |
| mitotic cell cycle (GO:0000278)                                        | 616  | 69 | 28.15 | + | 2.45 | 1.10E-10 | 4.53E-08 | yes |
| response to lipid (GO:0033993)                                         | 851  | 69 | 38.89 | + | 1.77 | 1.51E-05 | 1.19E-03 | yes |
| response to organonitrogen compound (GO:0010243)                       | 983  | 68 | 44.93 | + | 1.51 | 1.13E-03 | 3.75E-02 | yes |
| positive regulation of transport (GO:0051050)                          | 924  | 68 | 42.23 | + | 1.61 | 2.36E-04 | 1.10E-02 | yes |
| positive regulation of phosphorylation (GO:0042327)                    | 774  | 68 | 35.37 | + | 1.92 | 1.09E-06 | 1.35E-04 | yes |
| regulation of cell cycle process (GO:0010564)                          | 726  | 67 | 33.18 | + | 2.02 | 2.99E-07 | 4.17E-05 | yes |
| response to organic cyclic compound (GO:0014070)                       | 871  | 66 | 39.81 | + | 1.66 | 1.53E-04 | 7.74E-03 | yes |
| phosphorylation (GO:0016310)                                           | 883  | 66 | 40.36 | + | 1.64 | 2.33E-04 | 1.10E-02 | yes |
| tube morphogenesis (GO:0035239)                                        | 681  | 66 | 31.12 | + | 2.12 | 7.44E-08 | 1.29E-05 | yes |
| regulation of protein kinase activity (GO:0045859)                     | 619  | 66 | 28.29 | + | 2.33 | 1.72E-09 | 4.33E-07 | yes |
| mitotic cell cycle process (GO:1903047)                                | 522  | 65 | 23.86 | + | 2.72 | 8.52E-12 | 5.32E-09 | yes |
| positive regulation of protein phosphorylation (GO:0001934)            | 714  | 65 | 32.63 | + | 1.99 | 6.34E-07 | 8.38E-05 | yes |
| DNA metabolic process (GO:0006259)                                     | 789  | 65 | 36.06 | + | 1.8  | 1.59E-05 | 1.25E-03 | yes |
| hemopoiesis (GO:0030097)                                               | 684  | 65 | 31.26 | + | 2.08 | 1.40E-07 | 2.16E-05 | yes |
| regulation of cell projection organization (GO:0031344)                | 657  | 64 | 30.03 | + | 2.13 | 7.72E-08 | 1.32E-05 | yes |

|                                                                                 |      |    |        |   |      |          |          |     |
|---------------------------------------------------------------------------------|------|----|--------|---|------|----------|----------|-----|
| Unclassified (UNCLASSIFIED)                                                     | 2837 | 64 | 129.66 | - | 0.49 | 4.45E-11 | 2.17E-08 | yes |
| negative regulation of cellular component organization (GO:0051129)             | 711  | 63 | 32.5   | + | 1.94 | 2.37E-06 | 2.51E-04 | yes |
| regulation of plasma membrane bounded cell projection organization (GO:0120035) | 643  | 63 | 29.39  | + | 2.14 | 9.16E-08 | 1.50E-05 | yes |
| cell division (GO:0051301)                                                      | 521  | 62 | 23.81  | + | 2.6  | 1.00E-10 | 4.23E-08 | yes |
| cellular response to cytokine stimulus (GO:0071345)                             | 719  | 61 | 32.86  | + | 1.86 | 1.04E-05 | 9.04E-04 | yes |
| innate immune response (GO:0045087)                                             | 752  | 61 | 34.37  | + | 1.77 | 4.85E-05 | 3.03E-03 | yes |
| regulation of defense response (GO:0031347)                                     | 748  | 61 | 34.19  | + | 1.78 | 3.30E-05 | 2.24E-03 | yes |
| cell population proliferation (GO:0008283)                                      | 728  | 60 | 33.27  | + | 1.8  | 3.68E-05 | 2.42E-03 | yes |
| regulation of cytokine production (GO:0001817)                                  | 779  | 59 | 35.6   | + | 1.66 | 3.70E-04 | 1.62E-02 | yes |
| negative regulation of cell population proliferation (GO:0008285)               | 708  | 59 | 32.36  | + | 1.82 | 2.89E-05 | 2.02E-03 | yes |
| cell activation (GO:0001775)                                                    | 724  | 58 | 33.09  | + | 1.75 | 8.03E-05 | 4.49E-03 | yes |
| embryo development ending in birth or egg hatching (GO:0009792)                 | 684  | 58 | 31.26  | + | 1.86 | 2.11E-05 | 1.56E-03 | yes |
| protein phosphorylation (GO:0006468)                                            | 708  | 56 | 32.36  | + | 1.73 | 1.93E-04 | 9.36E-03 | yes |
| chordate embryonic development (GO:0043009)                                     | 662  | 56 | 30.26  | + | 1.85 | 3.59E-05 | 2.40E-03 | yes |
| regulation of proteolysis (GO:0030162)                                          | 711  | 56 | 32.5   | + | 1.72 | 1.99E-04 | 9.58E-03 | yes |
| positive regulation of cell motility (GO:2000147)                               | 559  | 54 | 25.55  | + | 2.11 | 1.03E-06 | 1.30E-04 | yes |
| positive regulation of locomotion (GO:0040017)                                  | 575  | 54 | 26.28  | + | 2.05 | 2.35E-06 | 2.51E-04 | yes |
| negative regulation of catalytic activity (GO:0043086)                          | 636  | 53 | 29.07  | + | 1.82 | 8.65E-05 | 4.75E-03 | yes |
| positive regulation of transferase activity (GO:0051347)                        | 524  | 51 | 23.95  | + | 2.13 | 2.11E-06 | 2.29E-04 | yes |
| chromosome organization (GO:0051276)                                            | 456  | 51 | 20.84  | + | 2.45 | 3.19E-08 | 6.15E-06 | yes |
| positive regulation of cell migration (GO:0030335)                              | 534  | 51 | 24.41  | + | 2.09 | 2.82E-06 | 2.94E-04 | yes |
| negative regulation of cell differentiation (GO:0045596)                        | 671  | 50 | 30.67  | + | 1.63 | 1.50E-03 | 4.80E-02 | yes |
| leukocyte activation (GO:0045321)                                               | 601  | 50 | 27.47  | + | 1.82 | 1.24E-04 | 6.50E-03 | yes |
| regulation of cell activation (GO:0050865)                                      | 652  | 50 | 29.8   | + | 1.68 | 6.81E-04 | 2.63E-02 | yes |
| epithelial cell differentiation (GO:0030855)                                    | 631  | 50 | 28.84  | + | 1.73 | 3.77E-04 | 1.62E-02 | yes |
| regulation of mitotic cell cycle (GO:0007346)                                   | 495  | 49 | 22.62  | + | 2.17 | 1.89E-06 | 2.15E-04 | yes |
| regulation of growth (GO:0040008)                                               | 625  | 49 | 28.57  | + | 1.72 | 5.15E-04 | 2.11E-02 | yes |
| cell-cell adhesion (GO:0098609)                                                 | 539  | 49 | 24.63  | + | 1.99 | 2.07E-05 | 1.53E-03 | yes |
| gland development (GO:0048732)                                                  | 425  | 48 | 19.42  | + | 2.47 | 6.91E-08 | 1.21E-05 | yes |
| vasculature development (GO:0001944)                                            | 537  | 47 | 24.54  | + | 1.92 | 5.43E-05 | 3.30E-03 | yes |
| cellular response to lipid (GO:0071396)                                         | 527  | 47 | 24.09  | + | 1.95 | 4.25E-05 | 2.74E-03 | yes |
| embryonic morphogenesis (GO:0048598)                                            | 592  | 47 | 27.06  | + | 1.74 | 5.25E-04 | 2.15E-02 | yes |
| actin filament-based process (GO:0030029)                                       | 601  | 47 | 27.47  | + | 1.71 | 8.16E-04 | 2.99E-02 | yes |
| sensory organ development (GO:0007423)                                          | 593  | 46 | 27.1   | + | 1.7  | 1.07E-03 | 3.62E-02 | yes |
| regulation of cell cycle phase transition (GO:1901987)                          | 435  | 46 | 19.88  | + | 2.31 | 6.96E-07 | 9.12E-05 | yes |
| blood vessel development (GO:0001568)                                           | 517  | 46 | 23.63  | + | 1.95 | 5.66E-05 | 3.40E-03 | yes |
| tissue morphogenesis (GO:0048729)                                               | 571  | 46 | 26.1   | + | 1.76 | 4.24E-04 | 1.80E-02 | yes |

|                                                                        |     |    |       |   |      |          |          |     |
|------------------------------------------------------------------------|-----|----|-------|---|------|----------|----------|-----|
| regulation of cytoskeleton organization<br>(GO:0051493)                | 521 | 46 | 23.81 | + | 1.93 | 6.12E-05 | 3.59E-03 | yes |
| regulation of leukocyte activation<br>(GO:0002694)                     | 595 | 46 | 27.19 | + | 1.69 | 1.10E-03 | 3.69E-02 | yes |
| regulation of nervous system development<br>(GO:0051960)               | 467 | 45 | 21.34 | + | 2.11 | 8.86E-06 | 7.81E-04 | yes |
| response to virus (GO:0009615)                                         | 367 | 45 | 16.77 | + | 2.68 | 2.53E-08 | 5.05E-06 | yes |
| negative regulation of immune system process<br>(GO:0002683)           | 480 | 45 | 21.94 | + | 2.05 | 1.84E-05 | 1.40E-03 | yes |
| leukocyte differentiation (GO:0002521)                                 | 424 | 44 | 19.38 | + | 2.27 | 1.82E-06 | 2.10E-04 | yes |
| embryonic organ development (GO:0048568)                               | 459 | 44 | 20.98 | + | 2.1  | 1.26E-05 | 1.08E-03 | yes |
| regulation of neuron projection development<br>(GO:0010975)            | 450 | 44 | 20.57 | + | 2.14 | 9.50E-06 | 8.33E-04 | yes |
| regulation of vesicle-mediated transport<br>(GO:0060627)               | 536 | 44 | 24.5  | + | 1.8  | 4.08E-04 | 1.75E-02 | yes |
| heart development (GO:0007507)                                         | 560 | 44 | 25.59 | + | 1.72 | 1.11E-03 | 3.72E-02 | yes |
| regulation of protein serine/threonine kinase<br>activity (GO:0071900) | 368 | 43 | 16.82 | + | 2.56 | 1.29E-07 | 2.03E-05 | yes |
| locomotion (GO:0040011)                                                | 541 | 43 | 24.73 | + | 1.74 | 9.20E-04 | 3.28E-02 | yes |
| actin cytoskeleton organization (GO:0030036)                           | 540 | 43 | 24.68 | + | 1.74 | 9.08E-04 | 3.24E-02 | yes |
| blood vessel morphogenesis (GO:0048514)                                | 429 | 42 | 19.61 | + | 2.14 | 1.72E-05 | 1.33E-03 | yes |
| positive regulation of cell development<br>(GO:0010720)                | 439 | 42 | 20.06 | + | 2.09 | 2.20E-05 | 1.60E-03 | yes |
| regulation of response to biotic stimulus<br>(GO:0002831)              | 478 | 42 | 21.85 | + | 1.92 | 1.26E-04 | 6.56E-03 | yes |
| positive regulation of cell adhesion<br>(GO:0045785)                   | 486 | 41 | 22.21 | + | 1.85 | 3.39E-04 | 1.51E-02 | yes |
| positive regulation of kinase activity<br>(GO:0033674)                 | 431 | 41 | 19.7  | + | 2.08 | 3.11E-05 | 2.15E-03 | yes |
| skeletal system development (GO:0001501)                               | 518 | 41 | 23.67 | + | 1.73 | 1.50E-03 | 4.79E-02 | yes |
| response to growth factor (GO:0070848)                                 | 509 | 41 | 23.26 | + | 1.76 | 9.44E-04 | 3.30E-02 | yes |
| regulation of lymphocyte activation<br>(GO:0051249)                    | 503 | 41 | 22.99 | + | 1.78 | 8.74E-04 | 3.13E-02 | yes |
| lymphocyte activation (GO:0046649)                                     | 478 | 41 | 21.85 | + | 1.88 | 2.83E-04 | 1.28E-02 | yes |
| negative regulation of cell cycle (GO:0045786)                         | 363 | 40 | 16.59 | + | 2.41 | 1.53E-06 | 1.82E-04 | yes |
| regulation of actin filament-based process<br>(GO:0032970)             | 390 | 40 | 17.82 | + | 2.24 | 7.10E-06 | 6.60E-04 | yes |
| regulation of mitotic cell cycle phase transition<br>(GO:1901990)      | 334 | 40 | 15.27 | + | 2.62 | 2.32E-07 | 3.35E-05 | yes |
| regulation of anatomical structure size<br>(GO:0090066)                | 503 | 40 | 22.99 | + | 1.74 | 1.31E-03 | 4.24E-02 | yes |
| regulation of neurogenesis (GO:0050767)                                | 386 | 40 | 17.64 | + | 2.27 | 5.98E-06 | 5.73E-04 | yes |
| cellular response to growth factor stimulus<br>(GO:0071363)            | 478 | 39 | 21.85 | + | 1.79 | 9.74E-04 | 3.38E-02 | yes |
| regulation of hemopoiesis (GO:1903706)                                 | 401 | 39 | 18.33 | + | 2.13 | 2.86E-05 | 2.01E-03 | yes |
| cytokine-mediated signaling pathway<br>(GO:0019221)                    | 372 | 38 | 17    | + | 2.24 | 1.34E-05 | 1.13E-03 | yes |
| chromosome segregation (GO:0007059)                                    | 325 | 38 | 14.85 | + | 2.56 | 7.15E-07 | 9.30E-05 | yes |
| response to wounding (GO:0009611)                                      | 453 | 38 | 20.7  | + | 1.84 | 7.05E-04 | 2.70E-02 | yes |
| regulation of protein-containing complex<br>assembly (GO:0043254)      | 422 | 38 | 19.29 | + | 1.97 | 1.83E-04 | 8.94E-03 | yes |
| defense response to symbiont (GO:0140546)                              | 266 | 37 | 12.16 | + | 3.04 | 1.76E-08 | 3.61E-06 | yes |
| defense response to virus (GO:0051607)                                 | 265 | 37 | 12.11 | + | 3.05 | 1.61E-08 | 3.35E-06 | yes |



|                                                                      |      |    |       |   |      |          |          |     |
|----------------------------------------------------------------------|------|----|-------|---|------|----------|----------|-----|
| positive regulation of cell projection organization (GO:0031346)     | 354  | 37 | 16.18 | + | 2.29 | 1.35E-05 | 1.13E-03 | yes |
| positive regulation of protein kinase activity (GO:0045860)          | 365  | 37 | 16.68 | + | 2.22 | 2.01E-05 | 1.50E-03 | yes |
| angiogenesis (GO:0001525)                                            | 336  | 36 | 15.36 | + | 2.34 | 8.53E-06 | 7.65E-04 | yes |
| growth (GO:0040007)                                                  | 419  | 36 | 19.15 | + | 1.88 | 6.63E-04 | 2.57E-02 | yes |
| developmental growth (GO:0048589)                                    | 419  | 36 | 19.15 | + | 1.88 | 6.63E-04 | 2.56E-02 | yes |
| regulation of peptidase activity (GO:0052547)                        | 408  | 35 | 18.65 | + | 1.88 | 8.62E-04 | 3.12E-02 | yes |
| negative regulation of response to external stimulus (GO:0032102)    | 416  | 35 | 19.01 | + | 1.84 | 1.01E-03 | 3.47E-02 | yes |
| regulation of binding (GO:0051098)                                   | 370  | 35 | 16.91 | + | 2.07 | 1.20E-04 | 6.37E-03 | yes |
| regulation of innate immune response (GO:0045088)                    | 385  | 34 | 17.6  | + | 1.93 | 6.07E-04 | 2.42E-02 | yes |
| regulation of cellular component size (GO:0032535)                   | 366  | 34 | 16.73 | + | 2.03 | 2.69E-04 | 1.23E-02 | yes |
| negative regulation of locomotion (GO:0040013)                       | 338  | 34 | 15.45 | + | 2.2  | 5.24E-05 | 3.22E-03 | yes |
| positive regulation of defense response (GO:0031349)                 | 389  | 34 | 17.78 | + | 1.91 | 6.62E-04 | 2.57E-02 | yes |
| lipid localization (GO:0010876)                                      | 383  | 34 | 17.5  | + | 1.94 | 5.85E-04 | 2.35E-02 | yes |
| negative regulation of organelle organization (GO:0010639)           | 341  | 34 | 15.59 | + | 2.18 | 5.90E-05 | 3.50E-03 | yes |
| regulation of supramolecular fiber organization (GO:1902903)         | 381  | 34 | 17.41 | + | 1.95 | 5.67E-04 | 2.29E-02 | yes |
| regulation of epithelial cell proliferation (GO:0050678)             | 372  | 33 | 17    | + | 1.94 | 7.72E-04 | 2.86E-02 | yes |
| axonogenesis (GO:0007409)                                            | 364  | 32 | 16.64 | + | 1.92 | 1.06E-03 | 3.60E-02 | yes |
| G protein-coupled receptor signaling pathway (GO:0007186)            | 1230 | 32 | 56.22 | - | 0.57 | 6.23E-04 | 2.45E-02 | yes |
| renal system development (GO:0072001)                                | 313  | 32 | 14.31 | + | 2.24 | 8.05E-05 | 4.49E-03 | yes |
| regulation of small GTPase mediated signal transduction (GO:0051056) | 304  | 32 | 13.89 | + | 2.3  | 3.72E-05 | 2.42E-03 | yes |
| organelle fission (GO:0048285)                                       | 334  | 32 | 15.27 | + | 2.1  | 2.32E-04 | 1.10E-02 | yes |
| negative regulation of cell cycle process (GO:0010948)               | 275  | 32 | 12.57 | + | 2.55 | 6.26E-06 | 5.92E-04 | yes |
| lipid transport (GO:0006869)                                         | 345  | 31 | 15.77 | + | 1.97 | 7.81E-04 | 2.88E-02 | yes |
| kidney development (GO:0001822)                                      | 303  | 31 | 13.85 | + | 2.24 | 1.10E-04 | 5.89E-03 | yes |
| regulation of actin cytoskeleton organization (GO:0032956)           | 348  | 31 | 15.9  | + | 1.95 | 8.41E-04 | 3.05E-02 | yes |
| embryonic organ morphogenesis (GO:0048562)                           | 302  | 31 | 13.8  | + | 2.25 | 1.08E-04 | 5.79E-03 | yes |
| nuclear division (GO:0000280)                                        | 308  | 31 | 14.08 | + | 2.2  | 1.25E-04 | 6.53E-03 | yes |
| mononuclear cell differentiation (GO:1903131)                        | 335  | 30 | 15.31 | + | 1.96 | 1.04E-03 | 3.56E-02 | yes |
| regulation of leukocyte differentiation (GO:1902105)                 | 319  | 30 | 14.58 | + | 2.06 | 4.74E-04 | 1.98E-02 | yes |
| negative regulation of cell motility (GO:2000146)                    | 301  | 30 | 13.76 | + | 2.18 | 1.85E-04 | 8.97E-03 | yes |
| nuclear chromosome segregation (GO:0098813)                          | 235  | 30 | 10.74 | + | 2.79 | 1.94E-06 | 2.18E-04 | yes |
| apoptotic signaling pathway (GO:0097190)                             | 313  | 30 | 14.31 | + | 2.1  | 4.17E-04 | 1.78E-02 | yes |
| wound healing (GO:0042060)                                           | 338  | 30 | 15.45 | + | 1.94 | 1.11E-03 | 3.72E-02 | yes |
| negative regulation of cell adhesion (GO:0007162)                    | 292  | 29 | 13.35 | + | 2.17 | 2.56E-04 | 1.17E-02 | yes |

|                                                                                            |     |    |       |   |      |          |          |     |
|--------------------------------------------------------------------------------------------|-----|----|-------|---|------|----------|----------|-----|
| regulation of endopeptidase activity<br>(GO:0052548)                                       | 320 | 29 | 14.63 | + | 1.98 | 8.73E-04 | 3.14E-02 | yes |
| negative regulation of cell migration<br>(GO:0030336)                                      | 286 | 29 | 13.07 | + | 2.22 | 2.21E-04 | 1.05E-02 | yes |
| regulation of epithelial cell migration<br>(GO:0010632)                                    | 229 | 29 | 10.47 | + | 2.77 | 3.30E-06 | 3.35E-04 | yes |
| regulation of chromosome organization<br>(GO:0033044)                                      | 251 | 28 | 11.47 | + | 2.44 | 4.34E-05 | 2.77E-03 | yes |
| response to decreased oxygen levels<br>(GO:0036293)                                        | 288 | 28 | 13.16 | + | 2.13 | 4.14E-04 | 1.77E-02 | yes |
| myeloid cell differentiation (GO:0030099)                                                  | 285 | 28 | 13.03 | + | 2.15 | 3.76E-04 | 1.63E-02 | yes |
| mesenchyme development (GO:0060485)                                                        | 243 | 27 | 11.11 | + | 2.43 | 6.31E-05 | 3.69E-03 | yes |
| negative regulation of cell cycle phase<br>transition (GO:1901988)                         | 229 | 27 | 10.47 | + | 2.58 | 3.28E-05 | 2.24E-03 | yes |
| response to hypoxia (GO:0001666)                                                           | 274 | 27 | 12.52 | + | 2.16 | 4.94E-04 | 2.04E-02 | yes |
| cell cycle phase transition (GO:0044770)                                                   | 175 | 27 | 8     | + | 3.38 | 2.40E-07 | 3.44E-05 | yes |
| anterior/posterior pattern specification<br>(GO:0009952)                                   | 209 | 27 | 9.55  | + | 2.83 | 5.12E-06 | 5.06E-04 | yes |
| regulation of viral process (GO:0050792)                                                   | 166 | 27 | 7.59  | + | 3.56 | 9.35E-08 | 1.52E-05 | yes |
| regulation of cell morphogenesis<br>(GO:0022604)                                           | 247 | 27 | 11.29 | + | 2.39 | 7.88E-05 | 4.42E-03 | yes |
| mitotic cell cycle phase transition<br>(GO:0044772)                                        | 164 | 26 | 7.5   | + | 3.47 | 2.51E-07 | 3.53E-05 | yes |
| homeostasis of number of cells<br>(GO:0048872)                                             | 270 | 26 | 12.34 | + | 2.11 | 7.86E-04 | 2.89E-02 | yes |
| regulation of leukocyte proliferation<br>(GO:0070663)                                      | 269 | 26 | 12.29 | + | 2.11 | 7.63E-04 | 2.84E-02 | yes |
| gliogenesis (GO:0042063)                                                                   | 266 | 26 | 12.16 | + | 2.14 | 7.04E-04 | 2.71E-02 | yes |
| axon guidance (GO:0007411)                                                                 | 232 | 25 | 10.6  | + | 2.36 | 1.75E-04 | 8.60E-03 | yes |
| positive regulation of cell cycle process<br>(GO:0090068)                                  | 253 | 25 | 11.56 | + | 2.16 | 9.02E-04 | 3.23E-02 | yes |
| positive regulation of neurogenesis<br>(GO:0050769)                                        | 240 | 25 | 10.97 | + | 2.28 | 3.55E-04 | 1.56E-02 | yes |
| neuron projection guidance (GO:0097485)                                                    | 232 | 25 | 10.6  | + | 2.36 | 1.75E-04 | 8.58E-03 | yes |
| regulation of protein modification by small<br>protein conjugation or removal (GO:1903320) | 257 | 25 | 11.75 | + | 2.13 | 9.78E-04 | 3.38E-02 | yes |
| regulation of chromosome segregation<br>(GO:0051983)                                       | 132 | 24 | 6.03  | + | 3.98 | 7.80E-08 | 1.32E-05 | yes |
| regulation of muscle system process<br>(GO:0090257)                                        | 234 | 24 | 10.69 | + | 2.24 | 5.48E-04 | 2.23E-02 | yes |
| regulation of protein ubiquitination<br>(GO:0031396)                                       | 215 | 24 | 9.83  | + | 2.44 | 1.59E-04 | 7.93E-03 | yes |
| cell cycle checkpoint signaling (GO:0000075)                                               | 161 | 24 | 7.36  | + | 3.26 | 1.90E-06 | 2.15E-04 | yes |
| negative regulation of mitotic cell cycle<br>(GO:0045930)                                  | 214 | 24 | 9.78  | + | 2.45 | 1.51E-04 | 7.70E-03 | yes |
| positive regulation of protein serine/threonine<br>kinase activity (GO:0071902)            | 197 | 23 | 9     | + | 2.55 | 1.53E-04 | 7.75E-03 | yes |
| negative regulation of mitotic cell cycle phase<br>transition (GO:1901991)                 | 167 | 23 | 7.63  | + | 3.01 | 9.98E-06 | 8.70E-04 | yes |
| mesenchymal cell differentiation<br>(GO:0048762)                                           | 171 | 23 | 7.82  | + | 2.94 | 1.41E-05 | 1.16E-03 | yes |
| mitotic nuclear division (GO:0140014)                                                      | 161 | 23 | 7.36  | + | 3.13 | 5.83E-06 | 5.62E-04 | yes |
| skeletal system morphogenesis (GO:0048705)                                                 | 232 | 23 | 10.6  | + | 2.17 | 9.91E-04 | 3.41E-02 | yes |
| regulation of cell-substrate adhesion<br>(GO:0010810)                                      | 219 | 23 | 10.01 | + | 2.3  | 6.45E-04 | 2.52E-02 | yes |

|                                                                            |     |    |       |   |      |          |          |     |
|----------------------------------------------------------------------------|-----|----|-------|---|------|----------|----------|-----|
| regulation of response to cytokine stimulus<br>(GO:0060759)                | 164 | 23 | 7.5   | + | 3.07 | 7.65E-06 | 7.03E-04 | yes |
| regulation of muscle contraction<br>(GO:0006937)                           | 168 | 22 | 7.68  | + | 2.87 | 3.10E-05 | 2.15E-03 | yes |
| regulation of myeloid cell differentiation<br>(GO:0045637)                 | 200 | 22 | 9.14  | + | 2.41 | 3.55E-04 | 1.57E-02 | yes |
| response to mechanical stimulus<br>(GO:0009612)                            | 222 | 22 | 10.15 | + | 2.17 | 1.32E-03 | 4.27E-02 | yes |
| positive regulation of epithelial cell<br>proliferation (GO:0050679)       | 209 | 22 | 9.55  | + | 2.3  | 5.64E-04 | 2.28E-02 | yes |
| regulation of MAP kinase activity<br>(GO:0043405)                          | 184 | 22 | 8.41  | + | 2.62 | 1.05E-04 | 5.68E-03 | yes |
| positive regulation of protein-containing<br>complex assembly (GO:0031334) | 201 | 22 | 9.19  | + | 2.39 | 3.72E-04 | 1.61E-02 | yes |
| regulation of viral life cycle (GO:1903900)                                | 143 | 22 | 6.54  | + | 3.37 | 3.20E-06 | 3.26E-04 | yes |
| sensory perception (GO:0007600)                                            | 995 | 22 | 45.48 | - | 0.48 | 1.52E-04 | 7.75E-03 | yes |
| glial cell differentiation (GO:0010001)                                    | 206 | 21 | 9.42  | + | 2.23 | 1.45E-03 | 4.65E-02 | yes |
| regulation of cytokine-mediated signaling<br>pathway (GO:0001959)          | 153 | 21 | 6.99  | + | 3    | 2.51E-05 | 1.78E-03 | yes |
| mitotic cell cycle checkpoint signaling<br>(GO:0007093)                    | 127 | 21 | 5.8   | + | 3.62 | 1.94E-06 | 2.16E-04 | yes |
| spindle organization (GO:0007051)                                          | 163 | 21 | 7.45  | + | 2.82 | 5.76E-05 | 3.45E-03 | yes |
| regulation of nuclear division (GO:0051783)                                | 146 | 21 | 6.67  | + | 3.15 | 1.34E-05 | 1.13E-03 | yes |
| stem cell differentiation (GO:0048863)                                     | 183 | 21 | 8.36  | + | 2.51 | 3.55E-04 | 1.57E-02 | yes |
| sister chromatid segregation (GO:0000819)                                  | 139 | 21 | 6.35  | + | 3.31 | 6.83E-06 | 6.39E-04 | yes |
| regulation of Ras protein signal transduction<br>(GO:0046578)              | 190 | 21 | 8.68  | + | 2.42 | 4.71E-04 | 1.97E-02 | yes |
| myeloid leukocyte differentiation<br>(GO:0002573)                          | 150 | 20 | 6.86  | + | 2.92 | 5.59E-05 | 3.37E-03 | yes |
| negative regulation of viral process<br>(GO:0048525)                       | 94  | 20 | 4.3   | + | 4.66 | 1.04E-07 | 1.67E-05 | yes |
| regulation of epithelial cell differentiation<br>(GO:0030856)              | 154 | 20 | 7.04  | + | 2.84 | 7.76E-05 | 4.37E-03 | yes |
| mitotic sister chromatid segregation<br>(GO:0000070)                       | 135 | 20 | 6.17  | + | 3.24 | 1.45E-05 | 1.19E-03 | yes |
| regulation of endothelial cell migration<br>(GO:0010594)                   | 169 | 20 | 7.72  | + | 2.59 | 2.41E-04 | 1.12E-02 | yes |
| regulation of cell cycle G1/S phase transition<br>(GO:1902806)             | 192 | 20 | 8.78  | + | 2.28 | 1.12E-03 | 3.74E-02 | yes |
| regulation of mitotic nuclear division<br>(GO:0007088)                     | 118 | 19 | 5.39  | + | 3.52 | 8.29E-06 | 7.52E-04 | yes |
| morphogenesis of a branching structure<br>(GO:0001763)                     | 175 | 19 | 8     | + | 2.38 | 1.05E-03 | 3.60E-02 | yes |
| kidney epithelium development<br>(GO:0072073)                              | 140 | 19 | 6.4   | + | 2.97 | 6.87E-05 | 3.94E-03 | yes |
| regulation of G1/S transition of mitotic cell<br>cycle (GO:2000045)        | 164 | 19 | 7.5   | + | 2.53 | 7.04E-04 | 2.70E-02 | yes |
| negative regulation of lymphocyte activation<br>(GO:0051250)               | 165 | 19 | 7.54  | + | 2.52 | 7.23E-04 | 2.75E-02 | yes |
| positive regulation of epithelial cell migration<br>(GO:0010634)           | 151 | 19 | 6.9   | + | 2.75 | 1.68E-04 | 8.32E-03 | yes |
| morphogenesis of a branching epithelium<br>(GO:0061138)                    | 165 | 19 | 7.54  | + | 2.52 | 7.23E-04 | 2.74E-02 | yes |
| regulation of cell cycle G2/M phase transition<br>(GO:1902749)             | 112 | 18 | 5.12  | + | 3.52 | 1.46E-05 | 1.18E-03 | yes |
| regulation of response to wounding<br>(GO:1903034)                         | 160 | 18 | 7.31  | + | 2.46 | 1.17E-03 | 3.83E-02 | yes |

|                                                                                      |     |    |      |   |      |          |          |     |
|--------------------------------------------------------------------------------------|-----|----|------|---|------|----------|----------|-----|
| regulation of sister chromatid segregation (GO:0033045)                              | 106 | 18 | 4.84 | + | 3.72 | 7.47E-06 | 6.90E-04 | yes |
| regulation of chromosome separation (GO:1905818)                                     | 74  | 18 | 3.38 | + | 5.32 | 7.97E-08 | 1.34E-05 | yes |
| regulation of axonogenesis (GO:0050770)                                              | 157 | 18 | 7.18 | + | 2.51 | 1.07E-03 | 3.60E-02 | yes |
| negative regulation of binding (GO:0051100)                                          | 162 | 18 | 7.4  | + | 2.43 | 1.25E-03 | 4.10E-02 | yes |
| microtubule cytoskeleton organization involved in mitosis (GO:1902850)               | 130 | 18 | 5.94 | + | 3.03 | 8.41E-05 | 4.64E-03 | yes |
| liver development (GO:0001889)                                                       | 135 | 17 | 6.17 | + | 2.76 | 3.61E-04 | 1.59E-02 | yes |
| nephron development (GO:0072006)                                                     | 138 | 17 | 6.31 | + | 2.7  | 4.54E-04 | 1.91E-02 | yes |
| regulation of viral genome replication (GO:0045069)                                  | 86  | 17 | 3.93 | + | 4.33 | 2.24E-06 | 2.41E-04 | yes |
| regulation of metaphase/anaphase transition of cell cycle (GO:1902099)               | 94  | 17 | 4.3  | + | 3.96 | 6.39E-06 | 6.01E-04 | yes |
| regulation of type I interferon production (GO:0032479)                              | 119 | 17 | 5.44 | + | 3.13 | 9.32E-05 | 5.08E-03 | yes |
| regulation of G2/M transition of mitotic cell cycle (GO:0010389)                     | 100 | 17 | 4.57 | + | 3.72 | 1.31E-05 | 1.11E-03 | yes |
| hepaticobiliary system development (GO:0061008)                                      | 138 | 17 | 6.31 | + | 2.7  | 4.54E-04 | 1.91E-02 | yes |
| mitotic spindle organization (GO:0007052)                                            | 95  | 16 | 4.34 | + | 3.69 | 2.59E-05 | 1.83E-03 | yes |
| regulation of animal organ morphogenesis (GO:2000027)                                | 129 | 16 | 5.9  | + | 2.71 | 6.17E-04 | 2.44E-02 | yes |
| mammary gland development (GO:0030879)                                               | 129 | 16 | 5.9  | + | 2.71 | 6.17E-04 | 2.43E-02 | yes |
| regulation of cyclin-dependent protein serine/threonine kinase activity (GO:0000079) | 112 | 16 | 5.12 | + | 3.13 | 1.48E-04 | 7.59E-03 | yes |
| regulation of cell shape (GO:0008360)                                                | 140 | 16 | 6.4  | + | 2.5  | 1.36E-03 | 4.36E-02 | yes |
| regulation of cyclin-dependent protein kinase activity (GO:1904029)                  | 115 | 16 | 5.26 | + | 3.04 | 1.95E-04 | 9.41E-03 | yes |
| regulation of mitotic metaphase/anaphase transition (GO:0030071)                     | 91  | 16 | 4.16 | + | 3.85 | 1.62E-05 | 1.26E-03 | yes |
| negative regulation of response to biotic stimulus (GO:0002832)                      | 133 | 16 | 6.08 | + | 2.63 | 8.30E-04 | 3.02E-02 | yes |
| nephron epithelium development (GO:0072009)                                          | 109 | 15 | 4.98 | + | 3.01 | 3.39E-04 | 1.51E-02 | yes |
| negative regulation of chromosome organization (GO:2001251)                          | 79  | 14 | 3.61 | + | 3.88 | 5.01E-05 | 3.09E-03 | yes |
| mesonephric tubule development (GO:0072164)                                          | 89  | 14 | 4.07 | + | 3.44 | 1.55E-04 | 7.81E-03 | yes |
| mesonephric epithelium development (GO:0072163)                                      | 89  | 14 | 4.07 | + | 3.44 | 1.55E-04 | 7.79E-03 | yes |
| mesonephros development (GO:0001823)                                                 | 93  | 14 | 4.25 | + | 3.29 | 2.33E-04 | 1.09E-02 | yes |
| hematopoietic progenitor cell differentiation (GO:0002244)                           | 106 | 14 | 4.84 | + | 2.89 | 7.62E-04 | 2.84E-02 | yes |
| ureteric bud development (GO:0001657)                                                | 88  | 14 | 4.02 | + | 3.48 | 1.40E-04 | 7.22E-03 | yes |
| negative regulation of viral genome replication (GO:0045071)                         | 56  | 14 | 2.56 | + | 5.47 | 1.66E-06 | 1.93E-04 | yes |
| positive regulation of type I interferon production (GO:0032481)                     | 71  | 14 | 3.24 | + | 4.31 | 1.77E-05 | 1.36E-03 | yes |
| gland morphogenesis (GO:0022612)                                                     | 106 | 14 | 4.84 | + | 2.89 | 7.62E-04 | 2.84E-02 | yes |
| neural crest cell differentiation (GO:0014033)                                       | 93  | 13 | 4.25 | + | 3.06 | 7.24E-04 | 2.74E-02 | yes |
| stem cell development (GO:0048864)                                                   | 86  | 13 | 3.93 | + | 3.31 | 3.72E-04 | 1.62E-02 | yes |
| embryonic skeletal system morphogenesis (GO:0048704)                                 | 95  | 13 | 4.34 | + | 2.99 | 8.65E-04 | 3.12E-02 | yes |
| positive regulation of smooth muscle cell proliferation (GO:0048661)                 | 85  | 13 | 3.88 | + | 3.35 | 3.37E-04 | 1.51E-02 | yes |

|                                                                            |     |    |       |   |      |          |          |     |
|----------------------------------------------------------------------------|-----|----|-------|---|------|----------|----------|-----|
| regulation of fibroblast proliferation<br>(GO:0048145)                     | 89  | 13 | 4.07  | + | 3.2  | 4.99E-04 | 2.06E-02 | yes |
| renal tubule development (GO:0061326)                                      | 91  | 13 | 4.16  | + | 3.13 | 6.03E-04 | 2.41E-02 | yes |
| negative regulation of innate immune response<br>(GO:0045824)              | 86  | 13 | 3.93  | + | 3.31 | 3.72E-04 | 1.62E-02 | yes |
| epithelial to mesenchymal transition<br>(GO:0001837)                       | 81  | 12 | 3.7   | + | 3.24 | 7.25E-04 | 2.73E-02 | yes |
| nephron tubule development (GO:0072080)                                    | 86  | 12 | 3.93  | + | 3.05 | 1.16E-03 | 3.82E-02 | yes |
| neural crest cell development (GO:0014032)                                 | 80  | 12 | 3.66  | + | 3.28 | 6.57E-04 | 2.56E-02 | yes |
| regulation of mitotic sister chromatid<br>segregation (GO:0033047)         | 55  | 12 | 2.51  | + | 4.77 | 2.95E-05 | 2.06E-03 | yes |
| detection of stimulus (GO:0051606)                                         | 686 | 12 | 31.35 | - | 0.38 | 1.48E-04 | 7.58E-03 | yes |
| post-translational protein modification<br>(GO:0043687)                    | 65  | 12 | 2.97  | + | 4.04 | 1.21E-04 | 6.41E-03 | yes |
| regulation of defense response to virus<br>(GO:0050688)                    | 85  | 12 | 3.88  | + | 3.09 | 1.06E-03 | 3.59E-02 | yes |
| regulation of cardiac muscle contraction<br>(GO:0055117)                   | 77  | 12 | 3.52  | + | 3.41 | 4.85E-04 | 2.01E-02 | yes |
| regulation of mitotic sister chromatid<br>separation (GO:0010965)          | 59  | 12 | 2.7   | + | 4.45 | 5.37E-05 | 3.27E-03 | yes |
| protein localization to chromosome<br>(GO:0034502)                         | 81  | 12 | 3.7   | + | 3.24 | 7.25E-04 | 2.73E-02 | yes |
| positive regulation of response to cytokine<br>stimulus (GO:0060760)       | 65  | 12 | 2.97  | + | 4.04 | 1.21E-04 | 6.39E-03 | yes |
| outflow tract morphogenesis (GO:0003151)                                   | 77  | 12 | 3.52  | + | 3.41 | 4.85E-04 | 2.01E-02 | yes |
| nephron epithelium morphogenesis<br>(GO:0072088)                           | 70  | 11 | 3.2   | + | 3.44 | 7.74E-04 | 2.86E-02 | yes |
| nephron tubule morphogenesis<br>(GO:0072078)                               | 68  | 11 | 3.11  | + | 3.54 | 6.25E-04 | 2.45E-02 | yes |
| positive regulation of DNA biosynthetic<br>process (GO:2000573)            | 75  | 11 | 3.43  | + | 3.21 | 1.28E-03 | 4.18E-02 | yes |
| nephron morphogenesis (GO:0072028)                                         | 73  | 11 | 3.34  | + | 3.3  | 1.05E-03 | 3.59E-02 | yes |
| cell cycle G2/M phase transition<br>(GO:0044839)                           | 57  | 11 | 2.61  | + | 4.22 | 1.64E-04 | 8.12E-03 | yes |
| regulation of interferon-beta production<br>(GO:0032648)                   | 60  | 11 | 2.74  | + | 4.01 | 2.43E-04 | 1.12E-02 | yes |
| negative regulation of nuclear division<br>(GO:0051784)                    | 48  | 11 | 2.19  | + | 5.01 | 4.28E-05 | 2.75E-03 | yes |
| regulation of morphogenesis of an epithelium<br>(GO:1905330)               | 65  | 11 | 2.97  | + | 3.7  | 4.46E-04 | 1.89E-02 | yes |
| positive regulation of epithelial cell<br>differentiation (GO:0030858)     | 61  | 11 | 2.79  | + | 3.95 | 2.76E-04 | 1.25E-02 | yes |
| renal tubule morphogenesis (GO:0061333)                                    | 72  | 11 | 3.29  | + | 3.34 | 9.52E-04 | 3.33E-02 | yes |
| response to type I interferon (GO:0034340)                                 | 54  | 11 | 2.47  | + | 4.46 | 1.08E-04 | 5.80E-03 | yes |
| regulation of protein maturation<br>(GO:1903317)                           | 73  | 11 | 3.34  | + | 3.3  | 1.05E-03 | 3.58E-02 | yes |
| negative regulation of cell cycle G2/M phase<br>transition (GO:1902750)    | 65  | 10 | 2.97  | + | 3.37 | 1.53E-03 | 4.86E-02 | yes |
| interferon-mediated signaling pathway<br>(GO:0140888)                      | 59  | 10 | 2.7   | + | 3.71 | 7.93E-04 | 2.91E-02 | yes |
| positive regulation of cytokine-mediated<br>signaling pathway (GO:0001961) | 58  | 10 | 2.65  | + | 3.77 | 7.05E-04 | 2.69E-02 | yes |
| mesonephric tubule morphogenesis<br>(GO:0072171)                           | 58  | 10 | 2.65  | + | 3.77 | 7.05E-04 | 2.68E-02 | yes |
| negative regulation of chromosome segregation<br>(GO:0051985)              | 36  | 10 | 1.65  | + | 6.08 | 2.36E-05 | 1.69E-03 | yes |
| positive regulation of interferon-beta<br>production (GO:0032728)          | 42  | 10 | 1.92  | + | 5.21 | 7.21E-05 | 4.11E-03 | yes |

|                                                                                 |    |    |      |   |       |          |          |     |
|---------------------------------------------------------------------------------|----|----|------|---|-------|----------|----------|-----|
| negative regulation of metaphase/anaphase transition of cell cycle (GO:1902100) | 35 | 10 | 1.6  | + | 6.25  | 1.92E-05 | 1.45E-03 | yes |
| negative regulation of chromosome separation (GO:1905819)                       | 35 | 10 | 1.6  | + | 6.25  | 1.92E-05 | 1.45E-03 | yes |
| regulation of kidney development (GO:0090183)                                   | 36 | 10 | 1.65 | + | 6.08  | 2.36E-05 | 1.68E-03 | yes |
| spindle checkpoint signaling (GO:0031577)                                       | 31 | 10 | 1.42 | + | 7.06  | 7.90E-06 | 7.21E-04 | yes |
| regulation of defense response to virus by host (GO:0050691)                    | 47 | 10 | 2.15 | + | 4.66  | 1.62E-04 | 8.03E-03 | yes |
| positive regulation of fibroblast proliferation (GO:0048146)                    | 54 | 10 | 2.47 | + | 4.05  | 4.30E-04 | 1.82E-02 | yes |
| G2/M transition of mitotic cell cycle (GO:0000086)                              | 52 | 10 | 2.38 | + | 4.21  | 3.30E-04 | 1.48E-02 | yes |
| negative regulation of G2/M transition of mitotic cell cycle (GO:0010972)       | 63 | 10 | 2.88 | + | 3.47  | 1.24E-03 | 4.06E-02 | yes |
| ureteric bud morphogenesis (GO:0060675)                                         | 57 | 10 | 2.61 | + | 3.84  | 6.26E-04 | 2.45E-02 | yes |
| negative regulation of mitotic sister chromatid separation (GO:2000816)         | 33 | 9  | 1.51 | + | 5.97  | 6.79E-05 | 3.96E-03 | yes |
| mitotic spindle assembly checkpoint signaling (GO:0007094)                      | 30 | 9  | 1.37 | + | 6.56  | 3.63E-05 | 2.41E-03 | yes |
| cellular response to type I interferon (GO:0071357)                             | 46 | 9  | 2.1  | + | 4.28  | 5.83E-04 | 2.34E-02 | yes |
| negative regulation of mitotic sister chromatid segregation (GO:0033048)        | 33 | 9  | 1.51 | + | 5.97  | 6.79E-05 | 3.94E-03 | yes |
| negative regulation of sister chromatid segregation (GO:0033046)                | 33 | 9  | 1.51 | + | 5.97  | 6.79E-05 | 3.93E-03 | yes |
| mitotic spindle checkpoint signaling (GO:0071174)                               | 30 | 9  | 1.37 | + | 6.56  | 3.63E-05 | 2.40E-03 | yes |
| spindle assembly checkpoint signaling (GO:0071173)                              | 30 | 9  | 1.37 | + | 6.56  | 3.63E-05 | 2.39E-03 | yes |
| positive regulation of morphogenesis of an epithelium (GO:1905332)              | 37 | 9  | 1.69 | + | 5.32  | 1.44E-04 | 7.39E-03 | yes |
| response to interferon-beta (GO:0035456)                                        | 35 | 9  | 1.6  | + | 5.63  | 9.99E-05 | 5.41E-03 | yes |
| regulation of morphogenesis of a branching structure (GO:0060688)               | 52 | 9  | 2.38 | + | 3.79  | 1.26E-03 | 4.11E-02 | yes |
| cytosolic pattern recognition receptor signaling pathway (GO:0002753)           | 50 | 9  | 2.29 | + | 3.94  | 9.86E-04 | 3.40E-02 | yes |
| negative regulation of mitotic metaphase/anaphase transition (GO:0045841)       | 33 | 9  | 1.51 | + | 5.97  | 6.79E-05 | 3.91E-03 | yes |
| negative regulation of mitotic nuclear division (GO:0045839)                    | 41 | 9  | 1.87 | + | 4.8   | 2.79E-04 | 1.27E-02 | yes |
| positive regulation of miRNA transcription (GO:1902895)                         | 51 | 9  | 2.33 | + | 3.86  | 1.12E-03 | 3.72E-02 | yes |
| regulation of actin filament-based movement (GO:1903115)                        | 40 | 8  | 1.83 | + | 4.38  | 1.03E-03 | 3.53E-02 | yes |
| positive regulation of defense response to virus by host (GO:0002230)           | 35 | 8  | 1.6  | + | 5     | 4.80E-04 | 2.00E-02 | yes |
| cell communication involved in cardiac conduction (GO:0086065)                  | 43 | 8  | 1.97 | + | 4.07  | 1.55E-03 | 4.91E-02 | yes |
| regulation of cardiac muscle cell contraction (GO:0086004)                      | 34 | 8  | 1.55 | + | 5.15  | 4.06E-04 | 1.75E-02 | yes |
| olfactory bulb development (GO:0021772)                                         | 33 | 7  | 1.51 | + | 4.64  | 1.57E-03 | 4.97E-02 | yes |
| positive regulation of animal organ morphogenesis (GO:0110110)                  | 32 | 7  | 1.46 | + | 4.79  | 1.35E-03 | 4.36E-02 | yes |
| regulation of nephron tubule epithelial cell differentiation (GO:0072182)       | 13 | 7  | 0.59 | + | 11.78 | 1.40E-05 | 1.16E-03 | yes |

|                                                                                                    |     |   |       |   |        |          |          |     |
|----------------------------------------------------------------------------------------------------|-----|---|-------|---|--------|----------|----------|-----|
| regulation of epithelial cell differentiation involved in kidney development (GO:2000696)          | 17  | 7 | 0.78  | + | 9.01   | 5.36E-05 | 3.28E-03 | yes |
| positive regulation of chromosome segregation (GO:0051984)                                         | 29  | 7 | 1.33  | + | 5.28   | 8.18E-04 | 2.99E-02 | yes |
| positive regulation of chromosome separation (GO:1905820)                                          | 31  | 7 | 1.42  | + | 4.94   | 1.15E-03 | 3.78E-02 | yes |
| regulation of cardiac muscle cell action potential (GO:0098901)                                    | 30  | 7 | 1.37  | + | 5.11   | 9.72E-04 | 3.38E-02 | yes |
| regulation of branching involved in ureteric bud morphogenesis (GO:0090189)                        | 22  | 7 | 1.01  | + | 6.96   | 2.00E-04 | 9.59E-03 | yes |
| response to gonadotropin (GO:0034698)                                                              | 30  | 7 | 1.37  | + | 5.11   | 9.72E-04 | 3.38E-02 | yes |
| cellular response to gonadotropin stimulus (GO:0071371)                                            | 20  | 6 | 0.91  | + | 6.56   | 7.44E-04 | 2.79E-02 | yes |
| cellular response to exogenous dsRNA (GO:0071360)                                                  | 18  | 6 | 0.82  | + | 7.29   | 4.69E-04 | 1.97E-02 | yes |
| cellular response to dsRNA (GO:0071359)                                                            | 23  | 6 | 1.05  | + | 5.71   | 1.37E-03 | 4.41E-02 | yes |
| regulation of ventricular cardiac muscle cell action potential (GO:0098911)                        | 12  | 6 | 0.55  | + | 10.94  | 8.10E-05 | 4.50E-03 | yes |
| positive regulation of branching involved in ureteric bud morphogenesis (GO:0090190)               | 19  | 6 | 0.87  | + | 6.91   | 5.94E-04 | 2.38E-02 | yes |
| positive regulation of cell migration involved in sprouting angiogenesis (GO:0090050)              | 21  | 6 | 0.96  | + | 6.25   | 9.22E-04 | 3.28E-02 | yes |
| regulation of transcription involved in G1/S transition of mitotic cell cycle (GO:0000083)         | 22  | 6 | 1.01  | + | 5.97   | 1.13E-03 | 3.75E-02 | yes |
| response to interferon-alpha (GO:0035455)                                                          | 21  | 6 | 0.96  | + | 6.25   | 9.22E-04 | 3.27E-02 | yes |
| dendrite self-avoidance (GO:0070593)                                                               | 14  | 5 | 0.64  | + | 7.81   | 1.10E-03 | 3.69E-02 | yes |
| regulation of metanephric nephron tubule epithelial cell differentiation (GO:0072307)              | 7   | 4 | 0.32  | + | 12.5   | 9.35E-04 | 3.31E-02 | yes |
| ureter morphogenesis (GO:0072197)                                                                  | 7   | 4 | 0.32  | + | 12.5   | 9.35E-04 | 3.30E-02 | yes |
| positive regulation of epithelial cell differentiation involved in kidney development (GO:2000698) | 7   | 4 | 0.32  | + | 12.5   | 9.35E-04 | 3.29E-02 | yes |
| regulation of microvillus assembly (GO:0032534)                                                    | 6   | 4 | 0.27  | + | 14.59  | 6.16E-04 | 2.45E-02 | yes |
| positive regulation of chromosome condensation (GO:1905821)                                        | 8   | 4 | 0.37  | + | 10.94  | 1.35E-03 | 4.38E-02 | yes |
| interleukin-27-mediated signaling pathway (GO:0070106)                                             | 7   | 4 | 0.32  | + | 12.5   | 9.35E-04 | 3.29E-02 | yes |
| bundle of His cell-Purkinje myocyte adhesion involved in cell communication (GO:0086073)           | 6   | 4 | 0.27  | + | 14.59  | 6.16E-04 | 2.44E-02 | yes |
| cardiac muscle cell-cardiac muscle cell adhesion (GO:0086042)                                      | 7   | 4 | 0.32  | + | 12.5   | 9.35E-04 | 3.28E-02 | yes |
| response to luteinizing hormone (GO:0034699)                                                       | 8   | 4 | 0.37  | + | 10.94  | 1.35E-03 | 4.37E-02 | yes |
| detection of stimulus involved in sensory perception (GO:0050906)                                  | 565 | 3 | 25.82 | - | 0.12   | 5.45E-08 | 9.78E-06 | yes |
| detection of chemical stimulus (GO:0009593)                                                        | 524 | 3 | 23.95 | - | 0.13   | 2.24E-07 | 3.30E-05 | yes |
| sensory perception of chemical stimulus (GO:0007606)                                               | 549 | 2 | 25.09 | - | 0.08   | 9.45E-09 | 2.05E-06 | yes |
| sensory perception of smell (GO:0007608)                                                           | 470 | 1 | 21.48 | - | 0.05   | 3.20E-08 | 6.09E-06 | yes |
| detection of chemical stimulus involved in sensory perception of smell (GO:0050911)                | 443 | 0 | 20.25 | - | < 0.01 | 4.60E-09 | 1.04E-06 | yes |
| detection of chemical stimulus involved in sensory perception (GO:0050907)                         | 491 | 0 | 22.44 | - | < 0.01 | 3.94E-10 | 1.43E-07 | yes |

|                                                                                                                               |    |    |      |   |       |          |          |    |
|-------------------------------------------------------------------------------------------------------------------------------|----|----|------|---|-------|----------|----------|----|
| positive regulation of fibroblast apoptotic process (GO:2000271)                                                              | 10 | 7  | 0.57 | + | 12.31 | 1.55E-05 | 1.02E-03 | no |
| positive regulation of chromosome condensation (GO:1905821)                                                                   | 8  | 5  | 0.46 | + | 10.99 | 4.00E-04 | 1.53E-02 | no |
| double-strand break repair via break-induced replication (GO:0000727)                                                         | 12 | 7  | 0.68 | + | 10.26 | 3.65E-05 | 2.09E-03 | no |
| DNA strand elongation involved in DNA replication (GO:0006271)                                                                | 15 | 8  | 0.85 | + | 9.38  | 1.63E-05 | 1.05E-03 | no |
| mitotic DNA replication (GO:1902969)                                                                                          | 14 | 7  | 0.8  | + | 8.79  | 7.66E-05 | 3.92E-03 | no |
| DNA unwinding involved in DNA replication (GO:0006268)                                                                        | 21 | 10 | 1.19 | + | 8.37  | 3.08E-06 | 2.67E-04 | no |
| regulation of fibroblast apoptotic process (GO:2000269)                                                                       | 19 | 9  | 1.08 | + | 8.33  | 1.00E-05 | 7.06E-04 | no |
| positive regulation of branching involved in ureteric bud morphogenesis (GO:0090190)                                          | 19 | 9  | 1.08 | + | 8.33  | 1.00E-05 | 7.03E-04 | no |
| positive regulation of DNA-directed DNA polymerase activity (GO:1900264)                                                      | 13 | 6  | 0.74 | + | 8.11  | 3.55E-04 | 1.39E-02 | no |
| regulation of DNA-directed DNA polymerase activity (GO:1900262)                                                               | 13 | 6  | 0.74 | + | 8.11  | 3.55E-04 | 1.39E-02 | no |
| regulation of chromosome condensation (GO:0060623)                                                                            | 11 | 5  | 0.63 | + | 7.99  | 1.19E-03 | 3.80E-02 | no |
| DNA strand elongation (GO:0022616)                                                                                            | 20 | 9  | 1.14 | + | 7.91  | 1.38E-05 | 9.25E-04 | no |
| dendrite self-avoidance (GO:0070593)                                                                                          | 14 | 6  | 0.8  | + | 7.54  | 4.84E-04 | 1.77E-02 | no |
| nuclear DNA replication (GO:0033260)                                                                                          | 26 | 11 | 1.48 | + | 7.44  | 2.45E-06 | 2.18E-04 | no |
| positive regulation of transcription from RNA polymerase II promoter in response to endoplasmic reticulum stress (GO:1990440) | 12 | 5  | 0.68 | + | 7.33  | 1.61E-03 | 4.87E-02 | no |
| skin morphogenesis (GO:0043589)                                                                                               | 12 | 5  | 0.68 | + | 7.33  | 1.61E-03 | 4.86E-02 | no |
| regulation of branching involved in ureteric bud morphogenesis (GO:0090189)                                                   | 22 | 9  | 1.25 | + | 7.19  | 2.52E-05 | 1.51E-03 | no |
| cell cycle DNA replication (GO:0044786)                                                                                       | 27 | 11 | 1.54 | + | 7.16  | 3.28E-06 | 2.80E-04 | no |
| positive regulation of chromosome separation (GO:1905820)                                                                     | 31 | 12 | 1.76 | + | 6.81  | 1.81E-06 | 1.66E-04 | no |
| spindle checkpoint signaling (GO:0031577)                                                                                     | 31 | 12 | 1.76 | + | 6.81  | 1.81E-06 | 1.65E-04 | no |
| regulation of attachment of spindle microtubules to kinetochore (GO:0051988)                                                  | 19 | 7  | 1.08 | + | 6.48  | 3.42E-04 | 1.36E-02 | no |
| mitotic spindle assembly checkpoint signaling (GO:0007094)                                                                    | 30 | 11 | 1.71 | + | 6.45  | 7.42E-06 | 5.54E-04 | no |
| mitotic spindle checkpoint signaling (GO:0071174)                                                                             | 30 | 11 | 1.71 | + | 6.45  | 7.42E-06 | 5.51E-04 | no |
| spindle assembly checkpoint signaling (GO:0071173)                                                                            | 30 | 11 | 1.71 | + | 6.45  | 7.42E-06 | 5.49E-04 | no |
| regulation of mammary gland epithelial cell proliferation (GO:0033599)                                                        | 17 | 6  | 0.97 | + | 6.21  | 1.10E-03 | 3.57E-02 | no |
| mitotic chromosome condensation (GO:0007076)                                                                                  | 17 | 6  | 0.97 | + | 6.21  | 1.10E-03 | 3.57E-02 | no |
| regulation of chemokine (C-X-C motif) ligand 2 production (GO:2000341)                                                        | 17 | 6  | 0.97 | + | 6.21  | 1.10E-03 | 3.56E-02 | no |
| positive regulation of chromosome segregation (GO:0051984)                                                                    | 29 | 10 | 1.65 | + | 6.06  | 2.98E-05 | 1.75E-03 | no |
| negative regulation of metaphase/anaphase transition of cell cycle (GO:1902100)                                               | 35 | 12 | 1.99 | + | 6.03  | 5.04E-06 | 4.04E-04 | no |
| negative regulation of chromosome separation (GO:1905819)                                                                     | 35 | 12 | 1.99 | + | 6.03  | 5.04E-06 | 4.02E-04 | no |
| response to interferon-alpha (GO:0035455)                                                                                     | 21 | 7  | 1.19 | + | 5.86  | 5.60E-04 | 1.99E-02 | no |
| negative regulation of mitotic sister chromatid separation (GO:2000816)                                                       | 33 | 11 | 1.88 | + | 5.86  | 1.55E-05 | 1.02E-03 | no |



|                                                                                                       |    |    |      |   |      |          |          |    |
|-------------------------------------------------------------------------------------------------------|----|----|------|---|------|----------|----------|----|
| negative regulation of chromosome segregation (GO:0051985)                                            | 36 | 12 | 2.05 | + | 5.86 | 6.40E-06 | 4.89E-04 | no |
| negative regulation of mitotic sister chromatid segregation (GO:0033048)                              | 33 | 11 | 1.88 | + | 5.86 | 1.55E-05 | 1.02E-03 | no |
| negative regulation of sister chromatid segregation (GO:0033046)                                      | 33 | 11 | 1.88 | + | 5.86 | 1.55E-05 | 1.01E-03 | no |
| negative regulation of mitotic metaphase/anaphase transition (GO:0045841)                             | 33 | 11 | 1.88 | + | 5.86 | 1.55E-05 | 1.01E-03 | no |
| positive regulation of morphogenesis of an epithelium (GO:1905332)                                    | 37 | 12 | 2.1  | + | 5.7  | 8.06E-06 | 5.91E-04 | no |
| integrated stress response signaling (GO:0140467)                                                     | 32 | 10 | 1.82 | + | 5.49 | 5.94E-05 | 3.18E-03 | no |
| regulation of chromosome separation (GO:1905818)                                                      | 74 | 23 | 4.21 | + | 5.46 | 1.28E-09 | 3.50E-07 | no |
| positive regulation of interferon-beta production (GO:0032728)                                        | 42 | 13 | 2.39 | + | 5.44 | 5.20E-06 | 4.06E-04 | no |
| regulation of kidney development (GO:0090183)                                                         | 36 | 11 | 2.05 | + | 5.37 | 3.04E-05 | 1.76E-03 | no |
| release of cytochrome c from mitochondria (GO:0001836)                                                | 23 | 7  | 1.31 | + | 5.35 | 8.77E-04 | 2.92E-02 | no |
| negative regulation of viral genome replication (GO:0045071)                                          | 56 | 17 | 3.19 | + | 5.34 | 2.39E-07 | 3.06E-05 | no |
| response to X-ray (GO:0010165)                                                                        | 30 | 9  | 1.71 | + | 5.27 | 1.80E-04 | 7.81E-03 | no |
| DNA replication initiation (GO:0006270)                                                               | 28 | 8  | 1.59 | + | 5.02 | 5.39E-04 | 1.93E-02 | no |
| response to interferon-beta (GO:0035456)                                                              | 35 | 10 | 1.99 | + | 5.02 | 1.11E-04 | 5.34E-03 | no |
| regulation of mitotic sister chromatid separation (GO:0010965)                                        | 59 | 16 | 3.36 | + | 4.77 | 1.89E-06 | 1.71E-04 | no |
| negative regulation of mitotic nuclear division (GO:0045839)                                          | 41 | 11 | 2.33 | + | 4.72 | 8.23E-05 | 4.13E-03 | no |
| regulation of interferon-beta production (GO:0032648)                                                 | 60 | 16 | 3.41 | + | 4.69 | 2.27E-06 | 2.04E-04 | no |
| cellular response to glucose starvation (GO:0042149)                                                  | 50 | 13 | 2.84 | + | 4.57 | 2.51E-05 | 1.51E-03 | no |
| liver regeneration (GO:0097421)                                                                       | 31 | 8  | 1.76 | + | 4.54 | 9.49E-04 | 3.13E-02 | no |
| xenobiotic transport (GO:0042908)                                                                     | 43 | 11 | 2.45 | + | 4.5  | 1.18E-04 | 5.61E-03 | no |
| negative regulation of viral process (GO:0048525)                                                     | 94 | 24 | 5.35 | + | 4.49 | 1.47E-08 | 3.07E-06 | no |
| regulation of mitotic sister chromatid segregation (GO:0033047)                                       | 55 | 14 | 3.13 | + | 4.48 | 1.52E-05 | 1.01E-03 | no |
| negative regulation of nuclear division (GO:0051784)                                                  | 48 | 12 | 2.73 | + | 4.4  | 7.07E-05 | 3.68E-03 | no |
| DNA duplex unwinding (GO:0032508)                                                                     | 76 | 19 | 4.32 | + | 4.4  | 6.06E-07 | 6.44E-05 | no |
| regulation of transcription from RNA polymerase II promoter in response to stress (GO:0043618)        | 36 | 9  | 2.05 | + | 4.4  | 5.62E-04 | 1.98E-02 | no |
| DNA geometric change (GO:0032392)                                                                     | 82 | 20 | 4.66 | + | 4.29 | 4.32E-07 | 4.96E-05 | no |
| regulation of endoplasmic reticulum stress-induced intrinsic apoptotic signaling pathway (GO:1902235) | 33 | 8  | 1.88 | + | 4.26 | 1.34E-03 | 4.17E-02 | no |
| ribonucleotide catabolic process (GO:0009261)                                                         | 50 | 12 | 2.84 | + | 4.22 | 9.88E-05 | 4.84E-03 | no |
| DNA damage response, signal transduction by p53 class mediator (GO:0030330)                           | 42 | 10 | 2.39 | + | 4.19 | 3.92E-04 | 1.50E-02 | no |
| positive regulation of miRNA transcription (GO:1902895)                                               | 51 | 12 | 2.9  | + | 4.14 | 1.16E-04 | 5.53E-03 | no |
| regulation of viral genome replication (GO:0045069)                                                   | 86 | 20 | 4.89 | + | 4.09 | 8.23E-07 | 8.34E-05 | no |

|                                                                                                           |     |    |      |   |      |          |          |    |
|-----------------------------------------------------------------------------------------------------------|-----|----|------|---|------|----------|----------|----|
| purine ribonucleotide catabolic process (GO:0009154)                                                      | 43  | 10 | 2.45 | + | 4.09 | 4.60E-04 | 1.71E-02 | no |
| purine nucleotide catabolic process (GO:0006195)                                                          | 52  | 12 | 2.96 | + | 4.06 | 1.36E-04 | 6.26E-03 | no |
| purine-containing compound catabolic process (GO:0072523)                                                 | 57  | 13 | 3.24 | + | 4.01 | 8.03E-05 | 4.09E-03 | no |
| regulation of chromosome segregation (GO:0051983)                                                         | 132 | 30 | 7.51 | + | 4    | 2.54E-09 | 6.40E-07 | no |
| positive regulation of type I interferon production (GO:0032481)                                          | 71  | 16 | 4.04 | + | 3.96 | 1.42E-05 | 9.50E-04 | no |
| response to type I interferon (GO:0034340)                                                                | 54  | 12 | 3.07 | + | 3.91 | 1.85E-04 | 7.99E-03 | no |
| regulation of erythrocyte differentiation (GO:0045646)                                                    | 45  | 10 | 2.56 | + | 3.91 | 6.26E-04 | 2.17E-02 | no |
| mitotic sister chromatid segregation (GO:0000070)                                                         | 135 | 30 | 7.68 | + | 3.91 | 3.99E-09 | 9.43E-07 | no |
| DNA conformation change (GO:0071103)                                                                      | 91  | 20 | 5.18 | + | 3.86 | 1.76E-06 | 1.63E-04 | no |
| somatic diversification of immune receptors via germline recombination within a single locus (GO:0002562) | 41  | 9  | 2.33 | + | 3.86 | 1.25E-03 | 3.94E-02 | no |
| somatic cell DNA recombination (GO:0016444)                                                               | 41  | 9  | 2.33 | + | 3.86 | 1.25E-03 | 3.93E-02 | no |
| sister chromatid segregation (GO:0000819)                                                                 | 139 | 30 | 7.91 | + | 3.79 | 7.13E-09 | 1.61E-06 | no |
| regulation of morphogenesis of an epithelium (GO:1905330)                                                 | 65  | 14 | 3.7  | + | 3.79 | 7.38E-05 | 3.81E-03 | no |
| regulation of DNA-templated transcription in response to stress (GO:0043620)                              | 42  | 9  | 2.39 | + | 3.77 | 1.44E-03 | 4.46E-02 | no |
| somatic diversification of immunoglobulins (GO:0016445)                                                   | 42  | 9  | 2.39 | + | 3.77 | 1.44E-03 | 4.46E-02 | no |
| regulation of metaphase/anaphase transition of cell cycle (GO:1902099)                                    | 94  | 20 | 5.35 | + | 3.74 | 2.70E-06 | 2.38E-04 | no |
| somatic diversification of immune receptors (GO:0002200)                                                  | 52  | 11 | 2.96 | + | 3.72 | 4.88E-04 | 1.78E-02 | no |
| regulation of DNA-templated DNA replication (GO:0090329)                                                  | 52  | 11 | 2.96 | + | 3.72 | 4.88E-04 | 1.77E-02 | no |
| mitotic nuclear division (GO:0140014)                                                                     | 161 | 34 | 9.16 | + | 3.71 | 1.17E-09 | 3.32E-07 | no |
| positive regulation of miRNA metabolic process (GO:2000630)                                               | 57  | 12 | 3.24 | + | 3.7  | 2.85E-04 | 1.15E-02 | no |
| regulation of mitotic metaphase/anaphase transition (GO:0030071)                                          | 91  | 19 | 5.18 | + | 3.67 | 6.04E-06 | 4.64E-04 | no |
| regulation of extrinsic apoptotic signaling pathway via death domain receptors (GO:1902041)               | 48  | 10 | 2.73 | + | 3.66 | 9.65E-04 | 3.16E-02 | no |
| regulation of sister chromatid segregation (GO:0033045)                                                   | 106 | 22 | 6.03 | + | 3.65 | 1.25E-06 | 1.19E-04 | no |
| skeletal muscle cell differentiation (GO:0035914)                                                         | 54  | 11 | 3.07 | + | 3.58 | 6.43E-04 | 2.22E-02 | no |
| regulation of mitotic nuclear division (GO:0007088)                                                       | 118 | 24 | 6.71 | + | 3.58 | 5.70E-07 | 6.18E-05 | no |
| regulation of viral life cycle (GO:1903900)                                                               | 143 | 29 | 8.13 | + | 3.57 | 4.15E-08 | 7.35E-06 | no |
| regulation of miRNA transcription (GO:1902893)                                                            | 70  | 14 | 3.98 | + | 3.52 | 1.47E-04 | 6.57E-03 | no |
| DNA-templated DNA replication (GO:0006261)                                                                | 135 | 27 | 7.68 | + | 3.52 | 1.54E-07 | 2.10E-05 | no |
| protein kinase B signaling (GO:0043491)                                                                   | 51  | 10 | 2.9  | + | 3.45 | 1.44E-03 | 4.46E-02 | no |
| regulation of viral-induced cytoplasmic pattern recognition receptor signaling pathway (GO:0039531)       | 57  | 11 | 3.24 | + | 3.39 | 9.51E-04 | 3.13E-02 | no |
| regulation of viral process (GO:0050792)                                                                  | 166 | 32 | 9.44 | + | 3.39 | 2.39E-08 | 4.67E-06 | no |

|                                                                                 |     |    |       |   |      |          |          |    |
|---------------------------------------------------------------------------------|-----|----|-------|---|------|----------|----------|----|
| G2/M transition of mitotic cell cycle<br>(GO:0000086)                           | 52  | 10 | 2.96  | + | 3.38 | 1.64E-03 | 4.94E-02 | no |
| regulation of morphogenesis of a branching<br>structure (GO:0060688)            | 52  | 10 | 2.96  | + | 3.38 | 1.64E-03 | 4.93E-02 | no |
| animal organ regeneration (GO:0031100)                                          | 68  | 13 | 3.87  | + | 3.36 | 3.67E-04 | 1.43E-02 | no |
| DNA replication (GO:0006260)                                                    | 199 | 38 | 11.32 | + | 3.36 | 1.50E-09 | 3.90E-07 | no |
| negative regulation of chromosome<br>organization (GO:2001251)                  | 79  | 15 | 4.49  | + | 3.34 | 1.43E-04 | 6.46E-03 | no |
| tumor necrosis factor-mediated signaling<br>pathway (GO:0033209)                | 58  | 11 | 3.3   | + | 3.33 | 1.08E-03 | 3.52E-02 | no |
| signal transduction by p53 class mediator<br>(GO:0072331)                       | 90  | 17 | 5.12  | + | 3.32 | 5.58E-05 | 3.00E-03 | no |
| double-strand break repair via homologous<br>recombination (GO:0000724)         | 117 | 22 | 6.65  | + | 3.31 | 5.10E-06 | 4.02E-04 | no |
| nuclear chromosome segregation<br>(GO:0098813)                                  | 235 | 44 | 13.37 | + | 3.29 | 1.34E-10 | 4.75E-08 | no |
| positive regulation of mitotic cell cycle phase<br>transition (GO:1901992)      | 91  | 17 | 5.18  | + | 3.28 | 6.29E-05 | 3.33E-03 | no |
| positive regulation of DNA biosynthetic<br>process (GO:2000573)                 | 75  | 14 | 4.27  | + | 3.28 | 2.75E-04 | 1.11E-02 | no |
| microtubule cytoskeleton organization<br>involved in mitosis (GO:1902850)       | 130 | 24 | 7.39  | + | 3.25 | 2.55E-06 | 2.26E-04 | no |
| positive regulation of cell cycle phase<br>transition (GO:1901989)              | 114 | 21 | 6.48  | + | 3.24 | 1.09E-05 | 7.58E-04 | no |
| response to osmotic stress (GO:0006970)                                         | 76  | 14 | 4.32  | + | 3.24 | 3.09E-04 | 1.24E-02 | no |
| circadian regulation of gene expression<br>(GO:0032922)                         | 71  | 13 | 4.04  | + | 3.22 | 5.27E-04 | 1.90E-02 | no |
| recombinational repair (GO:0000725)                                             | 121 | 22 | 6.88  | + | 3.2  | 8.16E-06 | 5.95E-04 | no |
| nucleotide catabolic process (GO:0009166)                                       | 77  | 14 | 4.38  | + | 3.2  | 3.48E-04 | 1.37E-02 | no |
| protein K48-linked ubiquitination<br>(GO:0070936)                               | 72  | 13 | 4.1   | + | 3.17 | 5.92E-04 | 2.09E-02 | no |
| mitotic spindle organization (GO:0007052)                                       | 95  | 17 | 5.4   | + | 3.15 | 1.00E-04 | 4.89E-03 | no |
| regulation of response to endoplasmic<br>reticulum stress (GO:1905897)          | 84  | 15 | 4.78  | + | 3.14 | 2.57E-04 | 1.06E-02 | no |
| response to unfolded protein (GO:0006986)                                       | 119 | 21 | 6.77  | + | 3.1  | 1.93E-05 | 1.22E-03 | no |
| telomere maintenance (GO:0000723)                                               | 97  | 17 | 5.52  | + | 3.08 | 1.25E-04 | 5.88E-03 | no |
| nucleoside phosphate catabolic process<br>(GO:1901292)                          | 86  | 15 | 4.89  | + | 3.07 | 3.22E-04 | 1.28E-02 | no |
| defense response to virus (GO:0051607)                                          | 265 | 46 | 15.07 | + | 3.05 | 4.54E-10 | 1.39E-07 | no |
| positive regulation of mitotic cell cycle<br>(GO:0045931)                       | 121 | 21 | 6.88  | + | 3.05 | 2.40E-05 | 1.47E-03 | no |
| DNA biosynthetic process (GO:0071897)                                           | 98  | 17 | 5.57  | + | 3.05 | 1.40E-04 | 6.38E-03 | no |
| intrinsic apoptotic signaling pathway in<br>response to DNA damage (GO:0008630) | 75  | 13 | 4.27  | + | 3.05 | 8.30E-04 | 2.77E-02 | no |
| defense response to symbiont (GO:0140546)                                       | 266 | 46 | 15.13 | + | 3.04 | 5.05E-10 | 1.52E-07 | no |
| epithelial to mesenchymal transition<br>(GO:0001837)                            | 81  | 14 | 4.61  | + | 3.04 | 5.45E-04 | 1.95E-02 | no |
| regulation of miRNA metabolic process<br>(GO:2000628)                           | 81  | 14 | 4.61  | + | 3.04 | 5.45E-04 | 1.95E-02 | no |
| regulation of nuclear division (GO:0051783)                                     | 146 | 25 | 8.3   | + | 3.01 | 5.17E-06 | 4.05E-04 | no |
| chromosome organization (GO:0051276)                                            | 456 | 78 | 25.94 | + | 3.01 | 7.27E-16 | 9.46E-13 | no |
| hematopoietic progenitor cell differentiation<br>(GO:0002244)                   | 106 | 18 | 6.03  | + | 2.99 | 1.14E-04 | 5.46E-03 | no |
| telomere organization (GO:0032200)                                              | 107 | 18 | 6.09  | + | 2.96 | 1.27E-04 | 5.94E-03 | no |

|                                                                                               |     |    |       |   |      |          |          |    |
|-----------------------------------------------------------------------------------------------|-----|----|-------|---|------|----------|----------|----|
| regulation of type I interferon production (GO:0032479)                                       | 119 | 20 | 6.77  | + | 2.96 | 5.55E-05 | 3.00E-03 | no |
| positive regulation of axonogenesis (GO:0050772)                                              | 78  | 13 | 4.44  | + | 2.93 | 1.14E-03 | 3.67E-02 | no |
| double-strand break repair (GO:0006302)                                                       | 210 | 35 | 11.94 | + | 2.93 | 1.30E-07 | 1.80E-05 | no |
| positive regulation of smooth muscle cell proliferation (GO:0048661)                          | 85  | 14 | 4.83  | + | 2.9  | 8.30E-04 | 2.77E-02 | no |
| negative regulation of epithelial cell proliferation (GO:0050680)                             | 140 | 23 | 7.96  | + | 2.89 | 2.19E-05 | 1.34E-03 | no |
| chromosome segregation (GO:0007059)                                                           | 325 | 53 | 18.48 | + | 2.87 | 1.63E-10 | 5.65E-08 | no |
| positive regulation of protein polymerization (GO:0032273)                                    | 92  | 15 | 5.23  | + | 2.87 | 6.03E-04 | 2.12E-02 | no |
| regulation of ERBB signaling pathway (GO:1901184)                                             | 80  | 13 | 4.55  | + | 2.86 | 1.40E-03 | 4.34E-02 | no |
| myeloid leukocyte differentiation (GO:0002573)                                                | 150 | 24 | 8.53  | + | 2.81 | 2.15E-05 | 1.33E-03 | no |
| positive regulation of proteasomal ubiquitin-dependent protein catabolic process (GO:0032436) | 94  | 15 | 5.35  | + | 2.81 | 7.35E-04 | 2.49E-02 | no |
| positive regulation of protein localization to nucleus (GO:1900182)                           | 94  | 15 | 5.35  | + | 2.81 | 7.35E-04 | 2.49E-02 | no |
| positive regulation of protein-containing complex assembly (GO:0031334)                       | 201 | 32 | 11.43 | + | 2.8  | 1.08E-06 | 1.06E-04 | no |
| ureteric bud development (GO:0001657)                                                         | 88  | 14 | 5.01  | + | 2.8  | 1.12E-03 | 3.61E-02 | no |
| mitotic cell cycle process (GO:1903047)                                                       | 522 | 83 | 29.69 | + | 2.8  | 5.14E-15 | 3.82E-12 | no |
| response to virus (GO:0009615)                                                                | 367 | 58 | 20.87 | + | 2.78 | 6.62E-11 | 2.40E-08 | no |
| negative regulation of response to biotic stimulus (GO:0002832)                               | 133 | 21 | 7.56  | + | 2.78 | 8.12E-05 | 4.10E-03 | no |
| mitotic cell cycle checkpoint signaling (GO:0007093)                                          | 127 | 20 | 7.22  | + | 2.77 | 1.23E-04 | 5.77E-03 | no |
| mesonephric tubule development (GO:0072164)                                                   | 89  | 14 | 5.06  | + | 2.77 | 1.23E-03 | 3.92E-02 | no |
| mesonephric epithelium development (GO:0072163)                                               | 89  | 14 | 5.06  | + | 2.77 | 1.23E-03 | 3.91E-02 | no |
| kidney epithelium development (GO:0072073)                                                    | 140 | 22 | 7.96  | + | 2.76 | 5.92E-05 | 3.17E-03 | no |
| response to topologically incorrect protein (GO:0035966)                                      | 141 | 22 | 8.02  | + | 2.74 | 6.50E-05 | 3.41E-03 | no |
| response to ionizing radiation (GO:0010212)                                                   | 144 | 22 | 8.19  | + | 2.69 | 8.56E-05 | 4.28E-03 | no |
| mitotic cell cycle phase transition (GO:0044772)                                              | 164 | 25 | 9.33  | + | 2.68 | 3.00E-05 | 1.75E-03 | no |
| positive regulation of ubiquitin-dependent protein catabolic process (GO:2000060)             | 112 | 17 | 6.37  | + | 2.67 | 5.61E-04 | 1.98E-02 | no |
| positive regulation of cell cycle process (GO:0090068)                                        | 253 | 38 | 14.39 | + | 2.64 | 4.95E-07 | 5.48E-05 | no |
| cell division (GO:0051301)                                                                    | 521 | 78 | 29.63 | + | 2.63 | 4.71E-13 | 2.37E-10 | no |
| negative regulation of mitotic cell cycle phase transition (GO:1901991)                       | 167 | 25 | 9.5   | + | 2.63 | 6.25E-05 | 3.32E-03 | no |
| cell cycle checkpoint signaling (GO:0000075)                                                  | 161 | 24 | 9.16  | + | 2.62 | 9.33E-05 | 4.59E-03 | no |
| liver development (GO:0001889)                                                                | 135 | 20 | 7.68  | + | 2.6  | 2.54E-04 | 1.05E-02 | no |
| mitotic cell cycle (GO:0000278)                                                               | 616 | 91 | 35.04 | + | 2.6  | 1.25E-14 | 7.78E-12 | no |
| positive regulation of epithelial cell migration (GO:0010634)                                 | 151 | 22 | 8.59  | + | 2.56 | 2.25E-04 | 9.39E-03 | no |
| viral entry into host cell (GO:0046718)                                                       | 110 | 16 | 6.26  | + | 2.56 | 1.20E-03 | 3.85E-02 | no |
| intrinsic apoptotic signaling pathway (GO:0097193)                                            | 165 | 24 | 9.38  | + | 2.56 | 1.11E-04 | 5.32E-03 | no |

|                                                                               |     |     |       |   |      |          |          |    |
|-------------------------------------------------------------------------------|-----|-----|-------|---|------|----------|----------|----|
| hepaticobiliary system development<br>(GO:0061008)                            | 138 | 20  | 7.85  | + | 2.55 | 4.83E-04 | 1.77E-02 | no |
| regulation of epithelial cell migration<br>(GO:0010632)                       | 229 | 33  | 13.02 | + | 2.53 | 5.53E-06 | 4.29E-04 | no |
| negative regulation of supramolecular fiber<br>organization (GO:1902904)      | 160 | 23  | 9.1   | + | 2.53 | 1.74E-04 | 7.62E-03 | no |
| regulation of mitotic cell cycle phase transition<br>(GO:1901990)             | 334 | 48  | 19    | + | 2.53 | 5.49E-08 | 9.31E-06 | no |
| cell cycle phase transition (GO:0044770)                                      | 175 | 25  | 9.95  | + | 2.51 | 9.21E-05 | 4.56E-03 | no |
| nuclear division (GO:0000280)                                                 | 308 | 44  | 17.52 | + | 2.51 | 2.42E-07 | 3.07E-05 | no |
| regulation of endothelial cell migration<br>(GO:0010594)                      | 169 | 24  | 9.61  | + | 2.5  | 1.38E-04 | 6.31E-03 | no |
| response to transforming growth factor beta<br>(GO:0071559)                   | 162 | 23  | 9.21  | + | 2.5  | 1.94E-04 | 8.26E-03 | no |
| cellular response to transforming growth factor<br>beta stimulus (GO:0071560) | 155 | 22  | 8.82  | + | 2.5  | 2.74E-04 | 1.11E-02 | no |
| spindle organization (GO:0007051)                                             | 163 | 23  | 9.27  | + | 2.48 | 2.05E-04 | 8.66E-03 | no |
| positive regulation of cell cycle (GO:0045787)                                | 346 | 48  | 19.68 | + | 2.44 | 1.16E-07 | 1.71E-05 | no |
| cellular response to starvation (GO:0009267)                                  | 173 | 24  | 9.84  | + | 2.44 | 1.77E-04 | 7.72E-03 | no |
| tube formation (GO:0035148)                                                   | 152 | 21  | 8.65  | + | 2.43 | 4.85E-04 | 1.77E-02 | no |
| organelle fission (GO:0048285)                                                | 334 | 46  | 19    | + | 2.42 | 2.57E-07 | 3.23E-05 | no |
| organophosphate catabolic process<br>(GO:0046434)                             | 138 | 19  | 7.85  | + | 2.42 | 9.63E-04 | 3.16E-02 | no |
| DNA recombination (GO:0006310)                                                | 248 | 34  | 14.11 | + | 2.41 | 1.22E-05 | 8.25E-04 | no |
| establishment of cell polarity (GO:0030010)                                   | 133 | 18  | 7.56  | + | 2.38 | 1.52E-03 | 4.65E-02 | no |
| regulation of myeloid cell differentiation<br>(GO:0045637)                    | 200 | 27  | 11.38 | + | 2.37 | 1.42E-04 | 6.46E-03 | no |
| cellular response to tumor necrosis factor<br>(GO:0071356)                    | 180 | 24  | 10.24 | + | 2.34 | 4.22E-04 | 1.59E-02 | no |
| epithelial cell proliferation (GO:0050673)                                    | 174 | 23  | 9.9   | + | 2.32 | 6.18E-04 | 2.15E-02 | no |
| regulation of chromosome organization<br>(GO:0033044)                         | 251 | 33  | 14.28 | + | 2.31 | 2.98E-05 | 1.74E-03 | no |
| cellular response to radiation (GO:0071478)                                   | 183 | 24  | 10.41 | + | 2.31 | 4.66E-04 | 1.72E-02 | no |
| regulation of cell cycle phase transition<br>(GO:1901987)                     | 435 | 57  | 24.74 | + | 2.3  | 4.74E-08 | 8.13E-06 | no |
| cell cycle process (GO:0022402)                                               | 878 | 115 | 49.94 | + | 2.3  | 5.64E-15 | 4.00E-12 | no |
| negative regulation of cell migration<br>(GO:0030336)                         | 286 | 37  | 16.27 | + | 2.27 | 1.56E-05 | 1.01E-03 | no |
| negative regulation of organelle organization<br>(GO:0010639)                 | 341 | 44  | 19.39 | + | 2.27 | 3.09E-06 | 2.66E-04 | no |
| mesenchymal cell differentiation<br>(GO:0048762)                              | 171 | 22  | 9.73  | + | 2.26 | 1.00E-03 | 3.27E-02 | no |
| DNA metabolic process (GO:0006259)                                            | 789 | 101 | 44.87 | + | 2.25 | 1.01E-12 | 4.77E-10 | no |
| immune system development (GO:0002520)                                        | 165 | 21  | 9.38  | + | 2.24 | 1.46E-03 | 4.50E-02 | no |
| DNA repair (GO:0006281)                                                       | 511 | 65  | 29.06 | + | 2.24 | 1.73E-08 | 3.55E-06 | no |
| negative regulation of cell cycle phase<br>transition (GO:1901988)            | 229 | 29  | 13.02 | + | 2.23 | 2.21E-04 | 9.26E-03 | no |
| regulation of epithelial cell proliferation<br>(GO:0050678)                   | 372 | 47  | 21.16 | + | 2.22 | 1.81E-06 | 1.67E-04 | no |
| negative regulation of cell motility<br>(GO:2000146)                          | 301 | 38  | 17.12 | + | 2.22 | 2.49E-05 | 1.51E-03 | no |
| response to tumor necrosis factor<br>(GO:0034612)                             | 206 | 26  | 11.72 | + | 2.22 | 3.69E-04 | 1.43E-02 | no |
| negative regulation of mitotic cell cycle<br>(GO:0045930)                     | 214 | 27  | 12.17 | + | 2.22 | 4.26E-04 | 1.60E-02 | no |

|                                                                      |      |     |       |   |      |          |          |    |
|----------------------------------------------------------------------|------|-----|-------|---|------|----------|----------|----|
| positive regulation of innate immune response (GO:0045089)           | 254  | 32  | 14.45 | + | 2.22 | 9.37E-05 | 4.60E-03 | no |
| regulation of protein ubiquitination (GO:0031396)                    | 215  | 27  | 12.23 | + | 2.21 | 4.36E-04 | 1.63E-02 | no |
| cellular response to nutrient levels (GO:0031669)                    | 231  | 29  | 13.14 | + | 2.21 | 2.35E-04 | 9.73E-03 | no |
| regulation of mitotic cell cycle (GO:0007346)                        | 495  | 62  | 28.15 | + | 2.2  | 5.78E-08 | 9.70E-06 | no |
| regulation of small GTPase mediated signal transduction (GO:0051056) | 304  | 38  | 17.29 | + | 2.2  | 2.73E-05 | 1.62E-03 | no |
| response to endoplasmic reticulum stress (GO:0034976)                | 224  | 28  | 12.74 | + | 2.2  | 3.29E-04 | 1.31E-02 | no |
| negative regulation of growth (GO:0045926)                           | 250  | 31  | 14.22 | + | 2.18 | 1.49E-04 | 6.62E-03 | no |
| response to starvation (GO:0042594)                                  | 212  | 26  | 12.06 | + | 2.16 | 6.86E-04 | 2.35E-02 | no |
| cellular response to extracellular stimulus (GO:0031668)             | 261  | 32  | 14.84 | + | 2.16 | 1.97E-04 | 8.36E-03 | no |
| kidney development (GO:0001822)                                      | 303  | 37  | 17.23 | + | 2.15 | 4.77E-05 | 2.62E-03 | no |
| regulation of protein polymerization (GO:0032271)                    | 197  | 24  | 11.2  | + | 2.14 | 1.30E-03 | 4.07E-02 | no |
| response to decreased oxygen levels (GO:0036293)                     | 288  | 35  | 16.38 | + | 2.14 | 8.75E-05 | 4.36E-03 | no |
| renal system development (GO:0072001)                                | 313  | 38  | 17.8  | + | 2.13 | 3.97E-05 | 2.25E-03 | no |
| cellular response to external stimulus (GO:0071496)                  | 330  | 40  | 18.77 | + | 2.13 | 3.38E-05 | 1.95E-03 | no |
| regulation of cell cycle process (GO:0010564)                        | 726  | 88  | 41.29 | + | 2.13 | 3.60E-10 | 1.12E-07 | no |
| positive regulation of neurogenesis (GO:0050769)                     | 240  | 29  | 13.65 | + | 2.12 | 3.44E-04 | 1.36E-02 | no |
| DNA damage response (GO:0006974)                                     | 765  | 92  | 43.51 | + | 2.11 | 2.08E-10 | 6.77E-08 | no |
| regulation of innate immune response (GO:0045088)                    | 385  | 46  | 21.9  | + | 2.1  | 1.13E-05 | 7.77E-04 | no |
| myeloid cell differentiation (GO:0030099)                            | 285  | 34  | 16.21 | + | 2.1  | 1.42E-04 | 6.47E-03 | no |
| regulation of response to biotic stimulus (GO:0002831)               | 478  | 57  | 27.19 | + | 2.1  | 8.56E-07 | 8.62E-05 | no |
| lipid transport (GO:0006869)                                         | 345  | 41  | 19.62 | + | 2.09 | 3.24E-05 | 1.88E-03 | no |
| regulation of cell cycle (GO:0051726)                                | 1120 | 133 | 63.7  | + | 2.09 | 2.90E-14 | 1.62E-11 | no |
| regulation of protein-containing complex assembly (GO:0043254)       | 422  | 50  | 24    | + | 2.08 | 6.46E-06 | 4.89E-04 | no |
| negative regulation of cell cycle (GO:0045786)                       | 363  | 43  | 20.65 | + | 2.08 | 2.91E-05 | 1.72E-03 | no |
| regulation of cysteine-type endopeptidase activity (GO:2000116)      | 228  | 27  | 12.97 | + | 2.08 | 7.18E-04 | 2.45E-02 | no |
| negative regulation of locomotion (GO:0040013)                       | 338  | 40  | 19.22 | + | 2.08 | 4.45E-05 | 2.46E-03 | no |
| establishment or maintenance of cell polarity (GO:0007163)           | 203  | 24  | 11.55 | + | 2.08 | 1.58E-03 | 4.83E-02 | no |
| biological process involved in symbiotic interaction (GO:0044403)    | 271  | 32  | 15.41 | + | 2.08 | 2.69E-04 | 1.09E-02 | no |
| positive regulation of DNA metabolic process (GO:0051054)            | 305  | 36  | 17.35 | + | 2.08 | 1.35E-04 | 6.22E-03 | no |
| cellular response to lipid (GO:0071396)                              | 527  | 62  | 29.97 | + | 2.07 | 4.14E-07 | 4.78E-05 | no |
| gland development (GO:0048732)                                       | 425  | 50  | 24.17 | + | 2.07 | 6.93E-06 | 5.22E-04 | no |
| response to hypoxia (GO:0001666)                                     | 274  | 32  | 15.58 | + | 2.05 | 3.06E-04 | 1.23E-02 | no |
| positive regulation of response to biotic stimulus (GO:0002833)      | 283  | 33  | 16.1  | + | 2.05 | 3.46E-04 | 1.36E-02 | no |
| negative regulation of cell cycle process (GO:0010948)               | 275  | 32  | 15.64 | + | 2.05 | 4.69E-04 | 1.73E-02 | no |

|                                                                                         |      |     |       |   |      |          |          |    |
|-----------------------------------------------------------------------------------------|------|-----|-------|---|------|----------|----------|----|
| regulation of I-kappaB kinase/NF-kappaB signaling (GO:0043122)                          | 259  | 30  | 14.73 | + | 2.04 | 5.50E-04 | 1.96E-02 | no |
| cellular response to abiotic stimulus (GO:0071214)                                      | 329  | 38  | 18.71 | + | 2.03 | 1.48E-04 | 6.61E-03 | no |
| cellular response to environmental stimulus (GO:0104004)                                | 329  | 38  | 18.71 | + | 2.03 | 1.48E-04 | 6.59E-03 | no |
| hemopoiesis (GO:0030097)                                                                | 684  | 79  | 38.9  | + | 2.03 | 2.75E-08 | 5.17E-06 | no |
| cellular response to chemical stress (GO:0062197)                                       | 286  | 33  | 16.27 | + | 2.03 | 3.71E-04 | 1.43E-02 | no |
| homeostasis of number of cells (GO:0048872)                                             | 270  | 31  | 15.36 | + | 2.02 | 6.70E-04 | 2.30E-02 | no |
| growth (GO:0040007)                                                                     | 419  | 48  | 23.83 | + | 2.01 | 1.69E-05 | 1.09E-03 | no |
| developmental growth (GO:0048589)                                                       | 419  | 48  | 23.83 | + | 2.01 | 1.69E-05 | 1.08E-03 | no |
| cell cycle (GO:0007049)                                                                 | 1267 | 145 | 72.06 | + | 2.01 | 2.69E-14 | 1.56E-11 | no |
| response to growth factor (GO:0070848)                                                  | 509  | 58  | 28.95 | + | 2    | 2.79E-06 | 2.43E-04 | no |
| cellular response to biotic stimulus (GO:0071216)                                       | 237  | 27  | 13.48 | + | 2    | 1.37E-03 | 4.25E-02 | no |
| response to oxygen levels (GO:0070482)                                                  | 316  | 36  | 17.97 | + | 2    | 2.84E-04 | 1.14E-02 | no |
| regulation of cell morphogenesis (GO:0022604)                                           | 247  | 28  | 14.05 | + | 1.99 | 1.12E-03 | 3.61E-02 | no |
| response to alcohol (GO:0097305)                                                        | 256  | 29  | 14.56 | + | 1.99 | 1.27E-03 | 3.98E-02 | no |
| regulation of neuron death (GO:1901214)                                                 | 327  | 37  | 18.6  | + | 1.99 | 2.27E-04 | 9.45E-03 | no |
| cellular response to growth factor stimulus (GO:0071363)                                | 478  | 54  | 27.19 | + | 1.99 | 8.92E-06 | 6.38E-04 | no |
| regulation of protein modification by small protein conjugation or removal (GO:1903320) | 257  | 29  | 14.62 | + | 1.98 | 1.29E-03 | 4.04E-02 | no |
| cell population proliferation (GO:0008283)                                              | 728  | 82  | 41.41 | + | 1.98 | 3.09E-08 | 5.61E-06 | no |
| lipid localization (GO:0010876)                                                         | 383  | 43  | 21.78 | + | 1.97 | 7.64E-05 | 3.92E-03 | no |
| negative regulation of cytokine production (GO:0001818)                                 | 295  | 33  | 16.78 | + | 1.97 | 7.28E-04 | 2.48E-02 | no |
| regulation of hemopoiesis (GO:1903706)                                                  | 401  | 44  | 22.81 | + | 1.93 | 1.08E-04 | 5.25E-03 | no |
| positive regulation of cell development (GO:0010720)                                    | 439  | 48  | 24.97 | + | 1.92 | 5.99E-05 | 3.19E-03 | no |
| positive regulation of proteolysis (GO:0045862)                                         | 367  | 40  | 20.87 | + | 1.92 | 2.24E-04 | 9.38E-03 | no |
| cellular response to stress (GO:0033554)                                                | 1610 | 175 | 91.57 | + | 1.91 | 3.39E-15 | 2.94E-12 | no |
| positive regulation of cellular component biogenesis (GO:0044089)                       | 508  | 55  | 28.89 | + | 1.9  | 2.49E-05 | 1.51E-03 | no |
| response to lipid (GO:0033993)                                                          | 851  | 92  | 48.4  | + | 1.9  | 3.27E-08 | 5.87E-06 | no |
| positive regulation of defense response (GO:0031349)                                    | 389  | 42  | 22.12 | + | 1.9  | 2.08E-04 | 8.77E-03 | no |
| positive regulation of nervous system development (GO:0051962)                          | 289  | 31  | 16.44 | + | 1.89 | 1.59E-03 | 4.83E-02 | no |
| negative regulation of cellular component organization (GO:0051129)                     | 711  | 76  | 40.44 | + | 1.88 | 7.18E-07 | 7.37E-05 | no |
| regulation of cellular response to stress (GO:0080135)                                  | 694  | 74  | 39.47 | + | 1.87 | 1.19E-06 | 1.14E-04 | no |
| leukocyte differentiation (GO:0002521)                                                  | 424  | 45  | 24.12 | + | 1.87 | 1.70E-04 | 7.48E-03 | no |
| regulation of protein serine/threonine kinase activity (GO:0071900)                     | 368  | 39  | 20.93 | + | 1.86 | 5.08E-04 | 1.83E-02 | no |
| chordate embryonic development (GO:0043009)                                             | 662  | 70  | 37.65 | + | 1.86 | 3.57E-06 | 3.03E-04 | no |
| apoptotic signaling pathway (GO:0097190)                                                | 313  | 33  | 17.8  | + | 1.85 | 1.57E-03 | 4.80E-02 | no |

|                                                                     |      |     |       |   |      |          |          |    |
|---------------------------------------------------------------------|------|-----|-------|---|------|----------|----------|----|
| regulation of apoptotic signaling pathway (GO:2001233)              | 371  | 39  | 21.1  | + | 1.85 | 5.49E-04 | 1.96E-02 | no |
| regulation of DNA metabolic process (GO:0051052)                    | 533  | 56  | 30.31 | + | 1.85 | 3.83E-05 | 2.18E-03 | no |
| regulation of supramolecular fiber organization (GO:1902903)        | 381  | 40  | 21.67 | + | 1.85 | 6.24E-04 | 2.17E-02 | no |
| positive regulation of cell projection organization (GO:0031346)    | 354  | 37  | 20.13 | + | 1.84 | 9.13E-04 | 3.02E-02 | no |
| embryo development ending in birth or egg hatching (GO:0009792)     | 684  | 71  | 38.9  | + | 1.83 | 5.07E-06 | 4.02E-04 | no |
| negative regulation of cell population proliferation (GO:0008285)   | 708  | 73  | 40.27 | + | 1.81 | 4.90E-06 | 3.94E-04 | no |
| regulation of response to stress (GO:0080134)                       | 1451 | 149 | 82.53 | + | 1.81 | 2.43E-11 | 9.48E-09 | no |
| response to radiation (GO:0009314)                                  | 448  | 46  | 25.48 | + | 1.81 | 3.60E-04 | 1.40E-02 | no |
| regulation of actin filament-based process (GO:0032970)             | 390  | 40  | 22.18 | + | 1.8  | 7.42E-04 | 2.51E-02 | no |
| transcription by RNA polymerase II (GO:0006366)                     | 361  | 37  | 20.53 | + | 1.8  | 1.50E-03 | 4.61E-02 | no |
| response to nutrient levels (GO:0031667)                            | 479  | 49  | 27.24 | + | 1.8  | 1.90E-04 | 8.16E-03 | no |
| response to extracellular stimulus (GO:0009991)                     | 509  | 52  | 28.95 | + | 1.8  | 1.32E-04 | 6.15E-03 | no |
| positive regulation of transferase activity (GO:0051347)            | 524  | 53  | 29.8  | + | 1.78 | 1.59E-04 | 7.04E-03 | no |
| regulation of anatomical structure morphogenesis (GO:0022603)       | 871  | 88  | 49.54 | + | 1.78 | 1.08E-06 | 1.06E-04 | no |
| positive regulation of cellular component organization (GO:0051130) | 1122 | 113 | 63.81 | + | 1.77 | 2.57E-08 | 4.89E-06 | no |
| defense response to other organism (GO:0098542)                     | 997  | 100 | 56.7  | + | 1.76 | 2.07E-07 | 2.74E-05 | no |
| response to organic cyclic compound (GO:0014070)                    | 871  | 87  | 49.54 | + | 1.76 | 1.60E-06 | 1.51E-04 | no |
| regulation of intracellular signal transduction (GO:1902531)        | 1727 | 172 | 98.22 | + | 1.75 | 6.19E-12 | 2.61E-09 | no |
| apoptotic process (GO:0006915)                                      | 1045 | 104 | 59.43 | + | 1.75 | 1.81E-07 | 2.43E-05 | no |
| intracellular signal transduction (GO:0035556)                      | 1520 | 151 | 86.45 | + | 1.75 | 1.84E-10 | 6.24E-08 | no |
| regulation of defense response (GO:0031347)                         | 748  | 74  | 42.54 | + | 1.74 | 1.30E-05 | 8.78E-04 | no |
| positive regulation of programmed cell death (GO:0043068)           | 527  | 52  | 29.97 | + | 1.73 | 3.44E-04 | 1.36E-02 | no |
| innate immune response (GO:0045087)                                 | 752  | 74  | 42.77 | + | 1.73 | 1.86E-05 | 1.18E-03 | no |
| lymphocyte activation (GO:0046649)                                  | 478  | 47  | 27.19 | + | 1.73 | 7.82E-04 | 2.63E-02 | no |
| tube development (GO:0035295)                                       | 897  | 88  | 51.02 | + | 1.72 | 3.11E-06 | 2.66E-04 | no |
| regulation of cell development (GO:0060284)                         | 827  | 81  | 47.04 | + | 1.72 | 7.90E-06 | 5.82E-04 | no |
| response to cytokine (GO:0034097)                                   | 817  | 80  | 46.47 | + | 1.72 | 9.89E-06 | 7.02E-04 | no |
| regulation of organelle organization (GO:0033043)                   | 1176 | 115 | 66.89 | + | 1.72 | 7.51E-08 | 1.22E-05 | no |
| protein localization to organelle (GO:0033365)                      | 728  | 71  | 41.41 | + | 1.71 | 4.00E-05 | 2.25E-03 | no |
| positive regulation of cell death (GO:0010942)                      | 595  | 58  | 33.84 | + | 1.71 | 1.93E-04 | 8.25E-03 | no |
| programmed cell death (GO:0012501)                                  | 1088 | 106 | 61.88 | + | 1.71 | 3.13E-07 | 3.85E-05 | no |
| endocytosis (GO:0006897)                                            | 534  | 52  | 30.37 | + | 1.71 | 3.89E-04 | 1.49E-02 | no |
| regulation of programmed cell death (GO:0043067)                    | 1510 | 147 | 85.88 | + | 1.71 | 1.42E-09 | 3.75E-07 | no |



|                                                                       |      |     |        |   |      |          |          |    |
|-----------------------------------------------------------------------|------|-----|--------|---|------|----------|----------|----|
| cellular response to organic cyclic compound (GO:0071407)             | 504  | 49  | 28.67  | + | 1.71 | 7.52E-04 | 2.53E-02 | no |
| positive regulation of organelle organization (GO:0010638)            | 515  | 50  | 29.29  | + | 1.71 | 6.06E-04 | 2.12E-02 | no |
| tube morphogenesis (GO:0035239)                                       | 681  | 66  | 38.73  | + | 1.7  | 9.26E-05 | 4.57E-03 | no |
| negative regulation of cell death (GO:0060548)                        | 1022 | 99  | 58.13  | + | 1.7  | 1.16E-06 | 1.12E-04 | no |
| regulation of apoptotic process (GO:0042981)                          | 1466 | 142 | 83.38  | + | 1.7  | 3.54E-09 | 8.51E-07 | no |
| negative regulation of programmed cell death (GO:0043069)             | 919  | 89  | 52.27  | + | 1.7  | 4.06E-06 | 3.37E-04 | no |
| positive regulation of phosphorus metabolic process (GO:0010562)      | 848  | 82  | 48.23  | + | 1.7  | 1.02E-05 | 7.16E-04 | no |
| positive regulation of phosphate metabolic process (GO:0045937)       | 848  | 82  | 48.23  | + | 1.7  | 1.02E-05 | 7.13E-04 | no |
| skeletal system development (GO:0001501)                              | 518  | 50  | 29.46  | + | 1.7  | 6.37E-04 | 2.20E-02 | no |
| positive regulation of apoptotic process (GO:0043065)                 | 508  | 49  | 28.89  | + | 1.7  | 7.90E-04 | 2.64E-02 | no |
| heart development (GO:0007507)                                        | 560  | 54  | 31.85  | + | 1.7  | 3.74E-04 | 1.44E-02 | no |
| negative regulation of apoptotic process (GO:0043066)                 | 892  | 86  | 50.73  | + | 1.7  | 8.29E-06 | 6.02E-04 | no |
| tissue morphogenesis (GO:0048729)                                     | 571  | 55  | 32.48  | + | 1.69 | 4.09E-04 | 1.56E-02 | no |
| cell death (GO:0008219)                                               | 1122 | 108 | 63.81  | + | 1.69 | 4.50E-07 | 5.05E-05 | no |
| positive regulation of response to external stimulus (GO:0032103)     | 531  | 51  | 30.2   | + | 1.69 | 7.25E-04 | 2.47E-02 | no |
| regulation of growth (GO:0040008)                                     | 625  | 60  | 35.55  | + | 1.69 | 1.99E-04 | 8.42E-03 | no |
| regulation of cell migration (GO:0030334)                             | 930  | 89  | 52.89  | + | 1.68 | 6.42E-06 | 4.89E-04 | no |
| positive regulation of intracellular signal transduction (GO:1902533) | 1005 | 96  | 57.16  | + | 1.68 | 2.71E-06 | 2.38E-04 | no |
| positive regulation of protein modification process (GO:0031401)      | 954  | 91  | 54.26  | + | 1.68 | 5.90E-06 | 4.56E-04 | no |
| regulation of cell death (GO:0010941)                                 | 1668 | 159 | 94.87  | + | 1.68 | 9.79E-10 | 2.83E-07 | no |
| microtubule cytoskeleton organization (GO:0000226)                    | 556  | 53  | 31.62  | + | 1.68 | 6.81E-04 | 2.34E-02 | no |
| regulation of protein kinase activity (GO:0045859)                    | 619  | 59  | 35.21  | + | 1.68 | 2.63E-04 | 1.07E-02 | no |
| regulation of transferase activity (GO:0051338)                       | 851  | 81  | 48.4   | + | 1.67 | 2.06E-05 | 1.29E-03 | no |
| animal organ morphogenesis (GO:0009887)                               | 989  | 94  | 56.25  | + | 1.67 | 4.42E-06 | 3.63E-04 | no |
| cell migration (GO:0016477)                                           | 875  | 83  | 49.77  | + | 1.67 | 1.89E-05 | 1.20E-03 | no |
| positive regulation of cell differentiation (GO:0045597)              | 854  | 81  | 48.57  | + | 1.67 | 2.17E-05 | 1.34E-03 | no |
| leukocyte activation (GO:0045321)                                     | 601  | 57  | 34.18  | + | 1.67 | 4.11E-04 | 1.56E-02 | no |
| response to stress (GO:0006950)                                       | 3407 | 323 | 193.77 | + | 1.67 | 4.73E-20 | 7.38E-16 | no |
| regulation of phosphate metabolic process (GO:0019220)                | 1322 | 125 | 75.19  | + | 1.66 | 1.27E-07 | 1.80E-05 | no |
| regulation of phosphorus metabolic process (GO:0051174)               | 1323 | 125 | 75.25  | + | 1.66 | 1.29E-07 | 1.79E-05 | no |
| positive regulation of phosphorylation (GO:0042327)                   | 774  | 73  | 44.02  | + | 1.66 | 6.78E-05 | 3.55E-03 | no |
| locomotion (GO:0040011)                                               | 541  | 51  | 30.77  | + | 1.66 | 1.13E-03 | 3.63E-02 | no |
| regulation of proteolysis (GO:0030162)                                | 711  | 67  | 40.44  | + | 1.66 | 1.34E-04 | 6.23E-03 | no |
| response to abiotic stimulus (GO:0009628)                             | 1117 | 105 | 63.53  | + | 1.65 | 1.67E-06 | 1.56E-04 | no |
| positive regulation of immune response (GO:0050778)                   | 621  | 58  | 35.32  | + | 1.64 | 5.09E-04 | 1.83E-02 | no |

|                                                                                        |      |     |        |   |      |          |          |    |
|----------------------------------------------------------------------------------------|------|-----|--------|---|------|----------|----------|----|
| biological process involved in interspecies interaction between organisms (GO:0044419) | 1542 | 144 | 87.7   | + | 1.64 | 2.17E-08 | 4.35E-06 | no |
| negative regulation of signal transduction (GO:0009968)                                | 1265 | 118 | 71.95  | + | 1.64 | 5.23E-07 | 5.71E-05 | no |
| regulation of catalytic activity (GO:0050790)                                          | 1825 | 170 | 103.8  | + | 1.64 | 1.20E-09 | 3.33E-07 | no |
| regulation of cell motility (GO:2000145)                                               | 989  | 92  | 56.25  | + | 1.64 | 1.19E-05 | 8.10E-04 | no |
| cellular response to organic substance (GO:0071310)                                    | 1776 | 165 | 101.01 | + | 1.63 | 2.79E-09 | 6.92E-07 | no |
| epithelium development (GO:0060429)                                                    | 1098 | 102 | 62.45  | + | 1.63 | 4.85E-06 | 3.92E-04 | no |
| positive regulation of protein metabolic process (GO:0051247)                          | 1446 | 134 | 82.24  | + | 1.63 | 1.15E-07 | 1.71E-05 | no |
| regulation of response to external stimulus (GO:0032101)                               | 1058 | 98  | 60.17  | + | 1.63 | 8.60E-06 | 6.18E-04 | no |
| regulation of cell adhesion (GO:0030155)                                               | 789  | 73  | 44.87  | + | 1.63 | 1.45E-04 | 6.55E-03 | no |
| positive regulation of protein phosphorylation (GO:0001934)                            | 714  | 66  | 40.61  | + | 1.63 | 2.59E-04 | 1.06E-02 | no |
| negative regulation of transcription by RNA polymerase II (GO:0000122)                 | 987  | 91  | 56.14  | + | 1.62 | 2.13E-05 | 1.33E-03 | no |
| cellular response to oxygen-containing compound (GO:1901701)                           | 1150 | 106 | 65.41  | + | 1.62 | 4.17E-06 | 3.44E-04 | no |
| regulation of locomotion (GO:0040012)                                                  | 1034 | 95  | 58.81  | + | 1.62 | 1.32E-05 | 8.91E-04 | no |
| cellular response to cytokine stimulus (GO:0071345)                                    | 719  | 66  | 40.89  | + | 1.61 | 3.60E-04 | 1.40E-02 | no |
| regulation of protein modification process (GO:0031399)                                | 1471 | 135 | 83.66  | + | 1.61 | 1.95E-07 | 2.60E-05 | no |
| regulation of phosphorylation (GO:0042325)                                             | 1177 | 108 | 66.94  | + | 1.61 | 3.89E-06 | 3.26E-04 | no |
| response to other organism (GO:0051707)                                                | 1363 | 125 | 77.52  | + | 1.61 | 5.07E-07 | 5.57E-05 | no |
| response to external biotic stimulus (GO:0043207)                                      | 1366 | 125 | 77.69  | + | 1.61 | 6.83E-07 | 7.06E-05 | no |
| response to organic substance (GO:0010033)                                             | 2590 | 237 | 147.31 | + | 1.61 | 8.86E-13 | 4.32E-10 | no |
| regulation of kinase activity (GO:0043549)                                             | 713  | 65  | 40.55  | + | 1.6  | 4.64E-04 | 1.72E-02 | no |
| defense response (GO:0006952)                                                          | 1417 | 129 | 80.59  | + | 1.6  | 5.71E-07 | 6.15E-05 | no |
| regulation of signal transduction (GO:0009966)                                         | 2990 | 272 | 170.06 | + | 1.6  | 1.77E-14 | 1.06E-11 | no |
| positive regulation of molecular function (GO:0044093)                                 | 1517 | 138 | 86.28  | + | 1.6  | 2.12E-07 | 2.79E-05 | no |
| negative regulation of response to stimulus (GO:0048585)                               | 1640 | 149 | 93.28  | + | 1.6  | 6.96E-08 | 1.14E-05 | no |
| response to biotic stimulus (GO:0009607)                                               | 1411 | 127 | 80.25  | + | 1.58 | 1.03E-06 | 1.01E-04 | no |
| regulation of protein phosphorylation (GO:0001932)                                     | 1079 | 97  | 61.37  | + | 1.58 | 2.58E-05 | 1.54E-03 | no |
| nucleobase-containing compound biosynthetic process (GO:0034654)                       | 1035 | 93  | 58.87  | + | 1.58 | 4.33E-05 | 2.41E-03 | no |
| positive regulation of signal transduction (GO:0009967)                                | 1551 | 139 | 88.21  | + | 1.58 | 3.83E-07 | 4.47E-05 | no |
| regulation of cellular component organization (GO:0051128)                             | 2445 | 219 | 139.06 | + | 1.57 | 5.98E-11 | 2.22E-08 | no |
| positive regulation of nitrogen compound metabolic process (GO:0051173)                | 3128 | 280 | 177.91 | + | 1.57 | 5.03E-14 | 2.71E-11 | no |
| tissue development (GO:0009888)                                                        | 1745 | 156 | 99.25  | + | 1.57 | 8.77E-08 | 1.34E-05 | no |
| regulation of cell communication (GO:0010646)                                          | 3402 | 304 | 193.49 | + | 1.57 | 2.31E-15 | 2.40E-12 | no |
| regulation of multicellular organismal development (GO:2000026)                        | 1399 | 125 | 79.57  | + | 1.57 | 2.19E-06 | 1.97E-04 | no |
| regulation of MAPK cascade (GO:0043408)                                                | 672  | 60  | 38.22  | + | 1.57 | 1.12E-03 | 3.61E-02 | no |

|                                                                                         |      |     |        |   |      |          |          |    |
|-----------------------------------------------------------------------------------------|------|-----|--------|---|------|----------|----------|----|
| negative regulation of gene expression<br>(GO:0010629)                                  | 941  | 84  | 53.52  | + | 1.57 | 1.19E-04 | 5.61E-03 | no |
| positive regulation of RNA biosynthetic<br>process (GO:1902680)                         | 1714 | 153 | 97.48  | + | 1.57 | 1.25E-07 | 1.79E-05 | no |
| circulatory system development (GO:0072359)                                             | 920  | 82  | 52.33  | + | 1.57 | 1.38E-04 | 6.34E-03 | no |
| embryo development (GO:0009790)                                                         | 1056 | 94  | 60.06  | + | 1.57 | 5.12E-05 | 2.78E-03 | no |
| negative regulation of cell communication<br>(GO:0010648)                               | 1360 | 121 | 77.35  | + | 1.56 | 3.87E-06 | 3.27E-04 | no |
| regulation of cellular component biogenesis<br>(GO:0044087)                             | 967  | 86  | 55     | + | 1.56 | 1.09E-04 | 5.29E-03 | no |
| negative regulation of signaling (GO:0023057)                                           | 1361 | 121 | 77.41  | + | 1.56 | 3.91E-06 | 3.26E-04 | no |
| regulation of cell population proliferation<br>(GO:0042127)                             | 1676 | 149 | 95.32  | + | 1.56 | 2.27E-07 | 2.95E-05 | no |
| regulation of signaling (GO:0023051)                                                    | 3393 | 301 | 192.98 | + | 1.56 | 7.97E-15 | 5.19E-12 | no |
| heterocycle biosynthetic process<br>(GO:0018130)                                        | 1106 | 98  | 62.9   | + | 1.56 | 4.21E-05 | 2.36E-03 | no |
| regulation of cytokine production<br>(GO:0001817)                                       | 779  | 69  | 44.31  | + | 1.56 | 6.04E-04 | 2.11E-02 | no |
| positive regulation of macromolecule<br>metabolic process (GO:0010604)                  | 3524 | 312 | 200.43 | + | 1.56 | 2.88E-15 | 2.64E-12 | no |
| positive regulation of cellular biosynthetic<br>process (GO:0031328)                    | 2014 | 178 | 114.55 | + | 1.55 | 1.47E-08 | 3.09E-06 | no |
| positive regulation of catalytic activity<br>(GO:0043085)                               | 1110 | 98  | 63.13  | + | 1.55 | 4.40E-05 | 2.44E-03 | no |
| positive regulation of biosynthetic process<br>(GO:0009891)                             | 2073 | 183 | 117.9  | + | 1.55 | 9.36E-09 | 2.00E-06 | no |
| positive regulation of nucleobase-containing<br>compound metabolic process (GO:0045935) | 2044 | 180 | 116.25 | + | 1.55 | 1.76E-08 | 3.57E-06 | no |
| response to nitrogen compound<br>(GO:1901698)                                           | 1057 | 93  | 60.12  | + | 1.55 | 9.05E-05 | 4.50E-03 | no |
| response to external stimulus (GO:0009605)                                              | 2410 | 212 | 137.07 | + | 1.55 | 6.77E-10 | 1.99E-07 | no |
| positive regulation of macromolecule<br>biosynthetic process (GO:0010557)               | 1934 | 170 | 110    | + | 1.55 | 4.72E-08 | 8.18E-06 | no |
| positive regulation of nucleic acid-templated<br>transcription (GO:1903508)             | 1707 | 150 | 97.09  | + | 1.55 | 3.80E-07 | 4.49E-05 | no |
| positive regulation of DNA-templated<br>transcription (GO:0045893)                      | 1707 | 150 | 97.09  | + | 1.55 | 3.80E-07 | 4.46E-05 | no |
| regulation of molecular function<br>(GO:0065009)                                        | 2567 | 225 | 146    | + | 1.54 | 1.96E-10 | 6.52E-08 | no |
| positive regulation of transcription by RNA<br>polymerase II (GO:0045944)               | 1256 | 110 | 71.44  | + | 1.54 | 2.31E-05 | 1.41E-03 | no |
| positive regulation of response to stimulus<br>(GO:0048584)                             | 2197 | 192 | 124.95 | + | 1.54 | 9.01E-09 | 1.95E-06 | no |
| positive regulation of signaling (GO:0023056)                                           | 1728 | 151 | 98.28  | + | 1.54 | 4.46E-07 | 5.04E-05 | no |
| positive regulation of cell communication<br>(GO:0010647)                               | 1729 | 151 | 98.34  | + | 1.54 | 4.52E-07 | 5.03E-05 | no |
| organic cyclic compound biosynthetic process<br>(GO:1901362)                            | 1238 | 108 | 70.41  | + | 1.53 | 2.73E-05 | 1.62E-03 | no |
| positive regulation of cellular metabolic<br>process (GO:0031325)                       | 2971 | 259 | 168.98 | + | 1.53 | 8.10E-12 | 3.33E-09 | no |
| response to oxygen-containing compound<br>(GO:1901700)                                  | 1679 | 146 | 95.49  | + | 1.53 | 9.65E-07 | 9.65E-05 | no |
| regulation of hydrolase activity (GO:0051336)                                           | 966  | 84  | 54.94  | + | 1.53 | 2.55E-04 | 1.05E-02 | no |
| aromatic compound biosynthetic process<br>(GO:0019438)                                  | 1116 | 97  | 63.47  | + | 1.53 | 8.10E-05 | 4.12E-03 | no |
| negative regulation of DNA-templated<br>transcription (GO:0045892)                      | 1315 | 114 | 74.79  | + | 1.52 | 2.03E-05 | 1.28E-03 | no |

|                                                                                      |      |     |        |   |      |          |          |    |
|--------------------------------------------------------------------------------------|------|-----|--------|---|------|----------|----------|----|
| cellular response to endogenous stimulus (GO:0071495)                                | 1200 | 104 | 68.25  | + | 1.52 | 4.83E-05 | 2.65E-03 | no |
| positive regulation of RNA metabolic process (GO:0051254)                            | 1847 | 160 | 105.05 | + | 1.52 | 3.22E-07 | 3.93E-05 | no |
| negative regulation of nucleic acid-templated transcription (GO:1903507)             | 1316 | 114 | 74.85  | + | 1.52 | 2.06E-05 | 1.29E-03 | no |
| cytoskeleton organization (GO:0007010)                                               | 1247 | 108 | 70.92  | + | 1.52 | 3.77E-05 | 2.15E-03 | no |
| organelle organization (GO:0006996)                                                  | 3050 | 264 | 173.47 | + | 1.52 | 9.94E-12 | 3.98E-09 | no |
| positive regulation of metabolic process (GO:0009893)                                | 3834 | 331 | 218.06 | + | 1.52 | 6.54E-15 | 4.44E-12 | no |
| regulation of response to stimulus (GO:0048583)                                      | 3954 | 341 | 224.88 | + | 1.52 | 2.83E-15 | 2.76E-12 | no |
| negative regulation of RNA biosynthetic process (GO:1902679)                         | 1330 | 114 | 75.64  | + | 1.51 | 3.74E-05 | 2.14E-03 | no |
| cellular response to chemical stimulus (GO:0070887)                                  | 2405 | 206 | 136.78 | + | 1.51 | 8.64E-09 | 1.90E-06 | no |
| regulation of cell differentiation (GO:0045595)                                      | 1556 | 133 | 88.5   | + | 1.5  | 8.38E-06 | 6.05E-04 | no |
| response to organonitrogen compound (GO:0010243)                                     | 983  | 84  | 55.91  | + | 1.5  | 4.76E-04 | 1.75E-02 | no |
| organonitrogen compound catabolic process (GO:1901565)                               | 1113 | 95  | 63.3   | + | 1.5  | 1.77E-04 | 7.74E-03 | no |
| regulation of protein metabolic process (GO:0051246)                                 | 2486 | 212 | 141.39 | + | 1.5  | 7.91E-09 | 1.76E-06 | no |
| positive regulation of cell population proliferation (GO:0008284)                    | 952  | 81  | 54.15  | + | 1.5  | 6.63E-04 | 2.28E-02 | no |
| phosphorylation (GO:0016310)                                                         | 883  | 75  | 50.22  | + | 1.49 | 1.21E-03 | 3.86E-02 | no |
| nucleic acid metabolic process (GO:0090304)                                          | 2279 | 193 | 129.62 | + | 1.49 | 7.72E-08 | 1.22E-05 | no |
| positive regulation of developmental process (GO:0051094)                            | 1314 | 111 | 74.73  | + | 1.49 | 7.47E-05 | 3.85E-03 | no |
| negative regulation of cellular process (GO:0048523)                                 | 4735 | 399 | 269.3  | + | 1.48 | 8.18E-17 | 1.82E-13 | no |
| positive regulation of multicellular organismal process (GO:0051240)                 | 1653 | 139 | 94.01  | + | 1.48 | 1.13E-05 | 7.77E-04 | no |
| regulation of immune system process (GO:0002682)                                     | 1480 | 124 | 84.18  | + | 1.47 | 4.16E-05 | 2.34E-03 | no |
| positive regulation of gene expression (GO:0010628)                                  | 1184 | 99  | 67.34  | + | 1.47 | 2.67E-04 | 1.09E-02 | no |
| negative regulation of biological process (GO:0048519)                               | 5336 | 446 | 303.49 | + | 1.47 | 8.07E-19 | 4.20E-15 | no |
| response to endogenous stimulus (GO:0009719)                                         | 1462 | 122 | 83.15  | + | 1.47 | 4.95E-05 | 2.70E-03 | no |
| negative regulation of macromolecule biosynthetic process (GO:0010558)               | 1547 | 128 | 87.99  | + | 1.45 | 4.70E-05 | 2.59E-03 | no |
| macromolecule catabolic process (GO:0009057)                                         | 1004 | 83  | 57.1   | + | 1.45 | 1.45E-03 | 4.46E-02 | no |
| regulation of developmental process (GO:0050793)                                     | 2460 | 202 | 139.91 | + | 1.44 | 2.59E-07 | 3.24E-05 | no |
| positive regulation of cellular process (GO:0048522)                                 | 5523 | 452 | 314.12 | + | 1.44 | 1.98E-17 | 6.17E-14 | no |
| negative regulation of macromolecule metabolic process (GO:0010605)                  | 2746 | 224 | 156.18 | + | 1.43 | 8.40E-08 | 1.30E-05 | no |
| negative regulation of nucleobase-containing compound metabolic process (GO:0045934) | 1560 | 127 | 88.73  | + | 1.43 | 1.01E-04 | 4.93E-03 | no |
| nucleobase-containing compound metabolic process (GO:0006139)                        | 2794 | 227 | 158.91 | + | 1.43 | 8.27E-08 | 1.29E-05 | no |
| negative regulation of biosynthetic process (GO:0009890)                             | 1638 | 133 | 93.16  | + | 1.43 | 7.32E-05 | 3.80E-03 | no |

|                                                                             |      |     |        |   |      |          |          |    |
|-----------------------------------------------------------------------------|------|-----|--------|---|------|----------|----------|----|
| negative regulation of RNA metabolic process (GO:0051253)                   | 1441 | 117 | 81.96  | + | 1.43 | 2.31E-04 | 9.59E-03 | no |
| positive regulation of biological process (GO:0048518)                      | 6234 | 503 | 354.56 | + | 1.42 | 6.33E-19 | 4.94E-15 | no |
| negative regulation of cellular biosynthetic process (GO:0031327)           | 1589 | 128 | 90.37  | + | 1.42 | 1.45E-04 | 6.53E-03 | no |
| phosphate-containing compound metabolic process (GO:0006796)                | 1815 | 146 | 103.23 | + | 1.41 | 5.08E-05 | 2.76E-03 | no |
| heterocycle metabolic process (GO:0046483)                                  | 2969 | 238 | 168.86 | + | 1.41 | 1.07E-07 | 1.62E-05 | no |
| phosphorus metabolic process (GO:0006793)                                   | 1841 | 147 | 104.71 | + | 1.4  | 7.04E-05 | 3.68E-03 | no |
| protein-containing complex assembly (GO:0065003)                            | 1267 | 101 | 72.06  | + | 1.4  | 1.25E-03 | 3.94E-02 | no |
| regulation of primary metabolic process (GO:0080090)                        | 5797 | 462 | 329.7  | + | 1.4  | 7.07E-16 | 1.00E-12 | no |
| regulation of nitrogen compound metabolic process (GO:0051171)              | 5624 | 448 | 319.87 | + | 1.4  | 3.43E-15 | 2.68E-12 | no |
| establishment of protein localization (GO:0045184)                          | 1284 | 102 | 73.03  | + | 1.4  | 1.33E-03 | 4.16E-02 | no |
| macromolecule localization (GO:0033036)                                     | 2368 | 188 | 134.68 | + | 1.4  | 7.03E-06 | 5.27E-04 | no |
| protein-containing complex organization (GO:0043933)                        | 1412 | 112 | 80.31  | + | 1.39 | 7.65E-04 | 2.57E-02 | no |
| animal organ development (GO:0048513)                                       | 2925 | 232 | 166.36 | + | 1.39 | 3.57E-07 | 4.26E-05 | no |
| regulation of multicellular organismal process (GO:0051239)                 | 2980 | 235 | 169.49 | + | 1.39 | 4.40E-07 | 5.01E-05 | no |
| negative regulation of nitrogen compound metabolic process (GO:0051172)     | 2375 | 187 | 135.08 | + | 1.38 | 1.12E-05 | 7.71E-04 | no |
| organic cyclic compound metabolic process (GO:1901360)                      | 3255 | 256 | 185.13 | + | 1.38 | 1.29E-07 | 1.81E-05 | no |
| negative regulation of metabolic process (GO:0009892)                       | 2976 | 234 | 169.26 | + | 1.38 | 6.65E-07 | 6.92E-05 | no |
| regulation of macromolecule metabolic process (GO:0060255)                  | 6162 | 484 | 350.46 | + | 1.38 | 9.95E-16 | 1.19E-12 | no |
| anatomical structure morphogenesis (GO:0009653)                             | 2233 | 175 | 127    | + | 1.38 | 2.96E-05 | 1.74E-03 | no |
| cellular component organization (GO:0016043)                                | 5497 | 430 | 312.64 | + | 1.38 | 3.28E-13 | 1.70E-10 | no |
| cellular nitrogen compound biosynthetic process (GO:0044271)                | 1627 | 127 | 92.54  | + | 1.37 | 6.02E-04 | 2.12E-02 | no |
| cellular macromolecule localization (GO:0070727)                            | 1935 | 151 | 110.05 | + | 1.37 | 1.53E-04 | 6.79E-03 | no |
| regulation of metabolic process (GO:0019222)                                | 6681 | 521 | 379.98 | + | 1.37 | 7.59E-17 | 1.97E-13 | no |
| cellular aromatic compound metabolic process (GO:0006725)                   | 3014 | 235 | 171.42 | + | 1.37 | 1.17E-06 | 1.12E-04 | no |
| protein localization (GO:0008104)                                           | 1929 | 150 | 109.71 | + | 1.37 | 1.84E-04 | 7.99E-03 | no |
| regulation of cellular metabolic process (GO:0031323)                       | 5447 | 423 | 309.8  | + | 1.37 | 2.02E-12 | 8.76E-10 | no |
| regulation of RNA biosynthetic process (GO:2001141)                         | 3431 | 266 | 195.14 | + | 1.36 | 2.29E-07 | 2.96E-05 | no |
| response to chemical (GO:0042221)                                           | 3899 | 302 | 221.76 | + | 1.36 | 2.50E-08 | 4.81E-06 | no |
| cell development (GO:0048468)                                               | 2169 | 168 | 123.36 | + | 1.36 | 8.17E-05 | 4.11E-03 | no |
| cellular component organization or biogenesis (GO:0071840)                  | 5700 | 440 | 324.19 | + | 1.36 | 1.22E-12 | 5.59E-10 | no |
| regulation of nucleobase-containing compound metabolic process (GO:0019219) | 4016 | 309 | 228.41 | + | 1.35 | 2.87E-08 | 5.34E-06 | no |
| organic substance transport (GO:0071702)                                    | 2210 | 170 | 125.69 | + | 1.35 | 1.13E-04 | 5.43E-03 | no |

|                                                                 |       |     |        |   |      |          |          |    |
|-----------------------------------------------------------------|-------|-----|--------|---|------|----------|----------|----|
| regulation of DNA-templated transcription (GO:0006355)          | 3406  | 262 | 193.72 | + | 1.35 | 6.06E-07 | 6.48E-05 | no |
| regulation of localization (GO:0032879)                         | 2133  | 164 | 121.31 | + | 1.35 | 1.34E-04 | 6.21E-03 | no |
| regulation of nucleic acid-templated transcription (GO:1903506) | 3408  | 262 | 193.83 | + | 1.35 | 6.11E-07 | 6.44E-05 | no |
| system development (GO:0048731)                                 | 3553  | 273 | 202.08 | + | 1.35 | 3.32E-07 | 4.01E-05 | no |
| regulation of macromolecule biosynthetic process (GO:0010556)   | 3917  | 299 | 222.78 | + | 1.34 | 1.18E-07 | 1.72E-05 | no |
| negative regulation of cellular metabolic process (GO:0031324)  | 2214  | 169 | 125.92 | + | 1.34 | 1.69E-04 | 7.46E-03 | no |
| regulation of transcription by RNA polymerase II (GO:0006357)   | 2418  | 184 | 137.52 | + | 1.34 | 8.11E-05 | 4.11E-03 | no |
| regulation of biosynthetic process (GO:0009889)                 | 4135  | 314 | 235.18 | + | 1.34 | 7.55E-08 | 1.21E-05 | no |
| immune system process (GO:0002376)                              | 2256  | 171 | 128.31 | + | 1.33 | 1.93E-04 | 8.26E-03 | no |
| regulation of cellular biosynthetic process (GO:0031326)        | 4026  | 305 | 228.98 | + | 1.33 | 1.59E-07 | 2.15E-05 | no |
| cellular nitrogen compound metabolic process (GO:0034641)       | 3344  | 252 | 190.19 | + | 1.32 | 4.66E-06 | 3.79E-04 | no |
| regulation of RNA metabolic process (GO:0051252)                | 3727  | 280 | 211.97 | + | 1.32 | 1.46E-06 | 1.38E-04 | no |
| cellular component assembly (GO:0022607)                        | 2413  | 181 | 137.24 | + | 1.32 | 2.03E-04 | 8.59E-03 | no |
| multicellular organism development (GO:0007275)                 | 3969  | 296 | 225.74 | + | 1.31 | 1.01E-06 | 1.00E-04 | no |
| regulation of gene expression (GO:0010468)                      | 4847  | 361 | 275.67 | + | 1.31 | 3.04E-08 | 5.58E-06 | no |
| cellular localization (GO:0051641)                              | 2701  | 201 | 153.62 | + | 1.31 | 1.19E-04 | 5.61E-03 | no |
| protein modification process (GO:0036211)                       | 2573  | 189 | 146.34 | + | 1.29 | 4.22E-04 | 1.59E-02 | no |
| cellular biosynthetic process (GO:0044249)                      | 2221  | 163 | 126.32 | + | 1.29 | 1.25E-03 | 3.94E-02 | no |
| cellular component biogenesis (GO:0044085)                      | 2648  | 194 | 150.61 | + | 1.29 | 4.19E-04 | 1.58E-02 | no |
| cellular metabolic process (GO:0044237)                         | 5808  | 425 | 330.33 | + | 1.29 | 5.63E-09 | 1.31E-06 | no |
| anatomical structure development (GO:0048856)                   | 5193  | 379 | 295.35 | + | 1.28 | 1.09E-07 | 1.63E-05 | no |
| macromolecule modification (GO:0043412)                         | 2796  | 203 | 159.02 | + | 1.28 | 4.10E-04 | 1.56E-02 | no |
| cellular response to stimulus (GO:0051716)                      | 6443  | 463 | 366.45 | + | 1.26 | 7.06E-09 | 1.62E-06 | no |
| localization (GO:0051179)                                       | 4498  | 322 | 255.82 | + | 1.26 | 9.86E-06 | 7.03E-04 | no |
| macromolecule metabolic process (GO:0043170)                    | 5934  | 424 | 337.5  | + | 1.26 | 1.19E-07 | 1.72E-05 | no |
| establishment of localization (GO:0051234)                      | 3934  | 281 | 223.75 | + | 1.26 | 6.40E-05 | 3.38E-03 | no |
| developmental process (GO:0032502)                              | 5732  | 406 | 326.01 | + | 1.25 | 7.46E-07 | 7.61E-05 | no |
| nitrogen compound metabolic process (GO:0006807)                | 6649  | 469 | 378.16 | + | 1.24 | 5.95E-08 | 9.88E-06 | no |
| cell differentiation (GO:0030154)                               | 3575  | 252 | 203.33 | + | 1.24 | 3.79E-04 | 1.46E-02 | no |
| response to stimulus (GO:0050896)                               | 8196  | 577 | 466.15 | + | 1.24 | 2.09E-10 | 6.64E-08 | no |
| cellular developmental process (GO:0048869)                     | 3599  | 253 | 204.69 | + | 1.24 | 4.53E-04 | 1.68E-02 | no |
| regulation of cellular process (GO:0050794)                     | 11006 | 769 | 625.97 | + | 1.23 | 1.83E-16 | 2.85E-13 | no |
| primary metabolic process (GO:0044238)                          | 7199  | 503 | 409.44 | + | 1.23 | 4.34E-08 | 7.60E-06 | no |
| metabolic process (GO:0008152)                                  | 8105  | 565 | 460.97 | + | 1.23 | 2.43E-09 | 6.22E-07 | no |
| protein metabolic process (GO:0019538)                          | 3867  | 269 | 219.94 | + | 1.22 | 4.89E-04 | 1.77E-02 | no |
| regulation of biological process (GO:0050789)                   | 11772 | 816 | 669.53 | + | 1.22 | 1.16E-17 | 4.52E-14 | no |
| organic substance metabolic process (GO:0071704)                | 7694  | 526 | 437.6  | + | 1.2  | 3.05E-07 | 3.77E-05 | no |

|                                                                                     |       |      |         |   |        |          |          |    |
|-------------------------------------------------------------------------------------|-------|------|---------|---|--------|----------|----------|----|
| organonitrogen compound metabolic process (GO:1901564)                              | 4908  | 333  | 279.14  | + | 1.19   | 4.38E-04 | 1.64E-02 | no |
| biological regulation (GO:0065007)                                                  | 12190 | 827  | 693.31  | + | 1.19   | 3.42E-15 | 2.81E-12 | no |
| cell communication (GO:0007154)                                                     | 5244  | 353  | 298.25  | + | 1.18   | 4.52E-04 | 1.68E-02 | no |
| signal transduction (GO:0007165)                                                    | 4783  | 320  | 272.03  | + | 1.18   | 1.59E-03 | 4.84E-02 | no |
| signaling (GO:0023052)                                                              | 5081  | 339  | 288.98  | + | 1.17   | 1.23E-03 | 3.91E-02 | no |
| cellular process (GO:0009987)                                                       | 14600 | 953  | 830.38  | + | 1.15   | 1.35E-15 | 1.50E-12 | no |
| biological_process (GO:0008150)                                                     | 17752 | 1100 | 1009.65 | + | 1.09   | 1.74E-16 | 3.40E-13 | no |
| nervous system process (GO:0050877)                                                 | 1460  | 51   | 83.04   | - | 0.61   | 1.88E-04 | 8.10E-03 | no |
| G protein-coupled receptor signaling pathway (GO:0007186)                           | 1230  | 32   | 69.96   | - | 0.46   | 6.22E-07 | 6.52E-05 | no |
| sensory perception (GO:0007600)                                                     | 995   | 25   | 56.59   | - | 0.44   | 4.58E-06 | 3.74E-04 | no |
| Unclassified (UNCLASSIFIED)                                                         | 2837  | 71   | 161.35  | - | 0.44   | 1.74E-16 | 3.02E-13 | no |
| detection of stimulus (GO:0051606)                                                  | 686   | 11   | 39.02   | - | 0.28   | 3.36E-07 | 4.03E-05 | no |
| detection of chemical stimulus (GO:0009593)                                         | 524   | 5    | 29.8    | - | 0.17   | 7.71E-08 | 1.23E-05 | no |
| sensory perception of chemical stimulus (GO:0007606)                                | 549   | 4    | 31.22   | - | 0.13   | 2.83E-09 | 6.91E-07 | no |
| detection of stimulus involved in sensory perception (GO:0050906)                   | 565   | 4    | 32.13   | - | 0.12   | 1.36E-09 | 3.66E-07 | no |
| sensory perception of smell (GO:0007608)                                            | 470   | 3    | 26.73   | - | 0.11   | 2.30E-08 | 4.54E-06 | no |
| cilium-dependent cell motility (GO:0060285)                                         | 136   | 0    | 7.74    | - | < 0.01 | 8.98E-04 | 2.98E-02 | no |
| cilium or flagellum-dependent cell motility (GO:0001539)                            | 136   | 0    | 7.74    | - | < 0.01 | 8.98E-04 | 2.98E-02 | no |
| detection of chemical stimulus involved in sensory perception of smell (GO:0050911) | 443   | 0    | 25.2    | - | < 0.01 | 3.20E-11 | 1.22E-08 | no |
| detection of chemical stimulus involved in sensory perception (GO:0050907)          | 491   | 0    | 27.93   | - | < 0.01 | 1.89E-12 | 8.43E-10 | no |
