# Supplementary material for: Transcriptomic and functional analysis of ANGPTL4 overexpression in pancreatic cancer nominates targets that reverse chemoresistance
Source: Springer Nature journal article supplement (doi:10.1186/s12885-023-11010-1), 2023-06-08
Supplement: MOESM8 [file 25464062]

Supplementary Table 6: List of 42 DEG genes for both ANGPTL4 expression and gemcitabine

HGNC Symbol

MYH16

KDM7A

PLAUR

MVP

CHDH

WWTR1

RNH1

ALAS1

FAM76B

SMARCA2

CXCL2

ATP8B1

EPS15

SMOX

OAS1

TBC1D2

TTC28

XBP1

APOL1

ARHGAP5

NFKBIA

PYGB

SLCO4A1

PTK6

TRIB3

DNTTIP1

AMMECR1

LYRM1

CRISPLD2

SFRP1

CDK6

OGDH

DNAJB6

PTPRZ1

SERPINE1

DDX58

PDLIM1

GATA3

DNMBP

STN1

CSF3

PNPO

: resistance
