# Supplementary material for: Transcriptomic and functional analysis of ANGPTL4 overexpression in pancreatic cancer nominates targets that reverse chemoresistance
Source: Springer Nature journal article supplement (doi:10.1186/s12885-023-11010-1), 2023-06-08
Supplement: MOESM9 [file 25464062]

Supplementary Table 7: Correlation analysis of TCGA-PAAD data using DEG gene list from MP2\_ANGPTL4\_OE vs MP2\_ANGPTL4\_KD analysis with or without gemcitabine treatment

| Gemcitabine treatment | row     | column  | correlation (r <sup>2</sup> ) | pvalue   | row     | column   | correlation (r <sup>2</sup> ) | pvalue     |
|-----------------------|---------|---------|-------------------------------|----------|---------|----------|-------------------------------|------------|
| yes                   | ANGPTL4 | CLCF1   | 0.482                         | 9.27E-12 | CLCF1   | Survival | -0.379                        | 1.82E-07   |
| yes                   | ANGPTL4 | TGM2    | 0.475                         | 2.10E-11 | TGM2    | Survival | -0.325                        | 9.40E-06   |
| yes                   | ANGPTL4 | CEBPB   | 0.474                         | 2.38E-11 | CEBPB   | Survival | -0.329                        | 7.55E-06   |
| yes                   | ANGPTL4 | PLAU    | 0.454                         | 2.03E-10 | PLAU    | Survival | -0.348                        | 1.91E-06   |
| yes                   | ANGPTL4 | PLAUR   | 0.386                         | 9.90E-08 | PLAUR   | Survival | -0.318                        | 1.53E-05   |
| yes                   | ANGPTL4 | APOL1   | 0.372                         | 3.10E-07 | APOL1   | Survival | -0.287                        | 0.00010078 |
| yes                   | ANGPTL4 | CD44    | 0.364                         | 5.80E-07 | CD44    | Survival | -0.373                        | 3.02E-07   |
| yes                   | ANGPTL4 | BHLHE40 | 0.363                         | 6.42E-07 | BHLHE40 | Survival | -0.319                        | 1.39E-05   |
| yes                   | ANGPTL4 | ITGB4   | 0.359                         | 8.63E-07 | ITGB4   | Survival | -0.297                        | 5.80E-05   |
| yes                   | ANGPTL4 | ARNTL2  | 0.357                         | 1.00E-06 | ARNTL2  | Survival | -0.280                        | 0.00015296 |
| yes                   | ANGPTL4 | RAP2B   | 0.352                         | 1.50E-06 | RAP2B   | Survival | -0.293                        | 7.37E-05   |
| yes                   | ANGPTL4 | NT5E    | 0.339                         | 3.65E-06 | NT5E    | Survival | -0.295                        | 6.40E-05   |
| yes                   | ANGPTL4 | UBASH3B | 0.335                         | 4.76E-06 | UBASH3B | Survival | -0.300                        | 4.63E-05   |
| yes                   | ANGPTL4 | TM4SF1  | 0.335                         | 4.99E-06 | TM4SF1  | Survival | -0.287                        | 0.00010357 |
| yes                   | ANGPTL4 | RALB    | 0.335                         | 5.02E-06 | RALB    | Survival | -0.382                        | 1.44E-07   |
| no                    | ANGPTL4 | DDIT4   | 0.534                         | 1.60E-14 | DDIT4   | Survival | -0.352                        | 1.48E-06   |
| no                    | ANGPTL4 | CMTM7   | 0.481                         | 1.05E-11 | CMTM7   | Survival | -0.360                        | 7.93E-07   |
| no                    | ANGPTL4 | TGM2    | 0.475                         | 2.10E-11 | TGM2    | Survival | -0.325                        | 9.40E-06   |
| no                    | ANGPTL4 | CEBPB   | 0.474                         | 2.38E-11 | CEBPB   | Survival | -0.329                        | 7.55E-06   |
| no                    | ANGPTL4 | PLAUR   | 0.386                         | 9.90E-08 | PLAUR   | Survival | -0.318                        | 1.53E-05   |
| no                    | ANGPTL4 | APOL1   | 0.372                         | 3.10E-07 | APOL1   | Survival | -0.287                        | 0.00010078 |
| no                    | ANGPTL4 | GJB3    | 0.372                         | 3.18E-07 | GJB3    | Survival | -0.353                        | 1.37E-06   |
| no                    | ANGPTL4 | CD44    | 0.364                         | 5.80E-07 | CD44    | Survival | -0.373                        | 3.02E-07   |
| no                    | ANGPTL4 | ITGB4   | 0.359                         | 8.63E-07 | ITGB4   | Survival | -0.297                        | 5.80E-05   |
| no                    | ANGPTL4 | RHOF    | 0.354                         | 1.21E-06 | RHOF    | Survival | -0.414                        | 9.03E-09   |
| no                    | ANGPTL4 | CAV2    | 0.354                         | 1.22E-06 | CAV2    | Survival | -0.340                        | 3.45E-06   |
| no                    | ANGPTL4 | RAP2B   | 0.352                         | 1.50E-06 | RAP2B   | Survival | -0.293                        | 7.37E-05   |
| no                    | ANGPTL4 | NT5E    | 0.339                         | 3.65E-06 | NT5E    | Survival | -0.295                        | 6.40E-05   |
| no                    | ANGPTL4 | TM4SF1  | 0.335                         | 4.99E-06 | TM4SF1  | Survival | -0.287                        | 0.00010357 |
| no                    | ANGPTL4 | RALB    | 0.335                         | 5.02E-06 | RALB    | Survival | -0.382                        | 1.44E-07   |
| no                    | ANGPTL4 | SDC4    | 0.334                         | 5.04E-06 | SDC4    | Survival | -0.304                        | 3.64E-05   |
