# Supplementary material for: Transcriptomic and functional analysis of ANGPTL4 overexpression in pancreatic cancer nominates targets that reverse chemoresistance
Source: Springer Nature journal article supplement (doi:10.1186/s12885-023-11010-1), 2023-06-08
Supplement: MOESM10 [file 25464062]

Supplementary Table 8: Pathway analysis results from DEG from MP2\_ANGPTL4\_OE vs MP2\_ANGPTL4\_KD analysis

| HGNC Symbol     | Ensembl Gene | log2 FoldChange | padj       | RTK | Notch | PIK3K-AKT | MAPK | RAS | MTOR | Extra Cellular Matrix | Angiogenesis | NFKB | TGFB | TNF SIGNALING | HIF1 | Description                                                                                                                           |
|-----------------|--------------|-----------------|------------|-----|-------|-----------|------|-----|------|-----------------------|--------------|------|------|---------------|------|---------------------------------------------------------------------------------------------------------------------------------------|
| ENSG00000164692 | COL1A2       | 1.05174507      | 0.00608569 |     |       | X         |      |     |      | X                     |              |      |      |               |      | collagen type I alpha 2 chain [Source:HGNC Symbol;Acc:HGNC:2198]                                                                      |
| ENSG00000163359 | COL6A3       | 1.06215621      | 5.93E-07   |     |       | X         |      |     |      | X                     |              |      |      |               |      | collagen type VI alpha 3 chain [Source:HGNC Symbol;Acc:HGNC:2213]                                                                     |
| ENSG00000146648 | EGFR         | 1.29021197      | 6.54E-40   |     |       | X         | X    | X   |      | X                     |              |      |      |               | X    | epidermal growth factor receptor [Source:HGNC Symbol;Acc:HGNC:3236]                                                                   |
| ENSG00000145675 | PIK3R1       | -0.8208581      | 0.04941779 |     |       | X         |      | X   | X    | X                     |              |      |      | X             | X    | phosphoinositide-3-kinase regulatory subunit 1 [Source:HGNC Symbol;Acc:HGNC:8979]                                                     |
| ENSG00000142173 | COL6A2       | 0.9527075       | 0.01322492 |     |       | X         |      |     |      | X                     |              |      |      |               |      | collagen type VI alpha 2 chain [Source:HGNC Symbol;Acc:HGNC:2212]                                                                     |
| ENSG00000138685 | FGF2         | 1.64001621      | 2.52E-17   |     |       | X         | X    | X   |      | X                     |              |      |      |               |      | fibroblast growth factor 2 [Source:HGNC Symbol;Acc:HGNC:3676]                                                                         |
| ENSG00000132470 | ITGB4        | 2.16782864      | 1.51E-35   |     |       | X         |      |     |      | X                     |              |      |      |               |      | integrin subunit beta 4 [Source:HGNC Symbol;Acc:HGNC:6158]                                                                            |
| ENSG00000126934 | MAP2K2       | 1.08827795      | 1.58E-15   |     |       | X         | X    | X   | X    | X                     |              |      |      |               | X    | mitogen-activated protein kinase kinase 2 [Source:HGNC Symbol;Acc:HGNC:6842]                                                          |
| ENSG00000118971 | CCND2        | 2.45910658      | 4.08E-06   |     |       | X         |      |     |      | X                     |              |      |      |               |      | cyclin D2 [Source:HGNC Symbol;Acc:HGNC:1583]                                                                                          |
| ENSG00000112715 | VEGFA        | 1.00958653      | 4.83E-09   | x   |       | X         | X    | X   |      | X                     |              |      |      |               | X    | vascular endothelial growth factor A [Source:HGNC Symbol;Acc:HGNC:12680]                                                              |
| ENSG00000112576 | CCND3        | -0.7815831      | 0.01309118 |     |       | X         |      |     |      | X                     |              |      |      |               |      | cyclin D3 [Source:HGNC Symbol;Acc:HGNC:1585]                                                                                          |
| ENSG00000247596 | TWF2         | 1.00044919      | 5.03E-06   |     |       | X         |      |     |      | X                     |              |      |      |               |      | twinfilin actin binding protein 2 [Source:HGNC Symbol;Acc:HGNC:9621]                                                                  |
| ENSG00000242498 | ARPN         | 1.37539404      | 0.00308745 |     |       |           |      |     |      | X                     |              |      |      |               |      | actin related protein 2/3 complex inhibitor [Source:HGNC Symbol;Acc:HGNC:28782]                                                       |
| ENSG00000241685 | ARPC1A       | 0.7700163       | 3.48E-05   |     |       |           |      |     |      | X                     |              |      |      |               |      | actin related protein 2/3 complex subunit 1A [Source:HGNC Symbol;Acc:HGNC:703]                                                        |
| ENSG00000197324 | LRP10        | 0.86561696      | 1.63E-06   |     |       |           |      |     |      | X                     |              |      |      |               |      | LDL receptor related protein 10 [Source:HGNC Symbol;Acc:HGNC:14553]                                                                   |
| ENSG00000196914 | ARHGEF12     | 0.87362959      | 4.12E-10   |     |       |           |      |     |      | X                     |              |      |      |               |      | Rho guanine nucleotide exchange factor 12 [Source:HGNC Symbol;Acc:HGNC:14193]                                                         |
| ENSG00000196526 | AFAP1        | 1.93406149      | 6.30E-27   |     |       |           |      |     |      | X                     |              |      |      |               |      | actin filament associated protein 1 [Source:HGNC Symbol;Acc:HGNC:24017]                                                               |
| ENSG00000189143 | CLDN4        | 0.88738427      | 3.31E-09   |     |       |           |      |     |      | X                     |              |      |      |               |      | claudin 4 [Source:HGNC Symbol;Acc:HGNC:2046]                                                                                          |
| ENSG00000183856 | IQGAP3       | -0.7473013      | 0.00343476 |     |       |           |      |     |      | X                     |              |      |      |               |      | IQ motif containing GTPase activating protein 3 [Source:HGNC Symbol;Acc:HGNC:20669]                                                   |
| ENSG00000181929 | PRKAG1       | 0.7203521       | 0.00311602 |     |       |           |      |     |      | X                     | X            |      |      |               |      | protein kinase AMP-activated non-catalytic subunit gamma 1 [Source:HGNC Symbol;Acc:HGNC:9385]                                         |
| ENSG00000177606 | JUN          | 1.46533239      | 2.60E-76   |     |       |           | X    |     |      | X                     |              |      |      | X             |      | Jun proto-oncogene, AP-1 transcription factor subunit [Source:HGNC Symbol;Acc:HGNC:6204]                                              |
| ENSG00000166333 | ILK          | 0.82609866      | 0.00065069 |     |       |           |      |     |      | X                     |              |      |      |               |      | integrin linked kinase [Source:HGNC Symbol;Acc:HGNC:6040]                                                                             |
| ENSG00000163347 | CLDN1        | 2.30926492      | 1.27E-40   |     |       |           |      |     |      | X                     |              |      |      |               |      | claudin 1 [Source:HGNC Symbol;Acc:HGNC:2032]                                                                                          |
| ENSG00000162733 | DDR2         | 1.24715432      | 8.01E-12   | x   |       |           |      |     |      | X                     |              |      |      |               |      | discoidin domain receptor tyrosine kinase 2 [Source:HGNC Symbol;Acc:HGNC:2731]                                                        |
| ENSG00000151491 | EP58         | 2.07406874      | 2.22E-10   |     |       |           |      |     |      | X                     |              |      |      |               |      | epidermal growth factor receptor pathway substrate 8 [Source:HGNC Symbol;Acc:HGNC:3420]                                               |
| ENSG00000148180 | GSN          | 1.65833359      | 5.18E-18   |     |       |           |      |     |      | X                     |              |      |      |               |      | gelsolin [Source:HGNC Symbol;Acc:HGNC:4620]                                                                                           |
| ENSG00000145703 | IQGAP2       | -0.8222412      | 0.00806923 |     |       |           |      |     |      | X                     |              |      |      |               |      | IQ motif containing GTPase activating protein 2 [Source:HGNC Symbol;Acc:HGNC:6111]                                                    |
| ENSG00000143621 | ILF2         | -0.9182398      | 7.17E-14   |     |       |           |      |     |      | X                     |              |      |      |               |      | interleukin enhancer binding factor 2 [Source:HGNC Symbol;Acc:HGNC:6037]                                                              |
| ENSG00000142798 | HSPG2        | 1.3060925       | 5.44E-07   |     |       |           |      |     |      | X                     |              |      |      |               |      | heparan sulfate proteoglycan 2 [Source:HGNC Symbol;Acc:HGNC:5273]                                                                     |
| ENSG00000142330 | CAPN10       | -0.8837466      | 0.07913583 |     |       |           |      |     |      | X                     |              |      |      |               |      | calpain 10 [Source:HGNC Symbol;Acc:HGNC:1477]                                                                                         |
| ENSG00000139734 | DIAPH3       | -0.9810457      | 2.83E-16   |     |       |           |      |     |      | X                     |              |      |      |               |      | diaphanous related formin 3 [Source:HGNC Symbol;Acc:HGNC:15480]                                                                       |
| ENSG00000139725 | RHOF         | 1.03585557      | 2.76E-05   |     |       |           |      |     |      | X                     |              |      |      |               |      | ras homolog family member F, filopodia associated [Source:HGNC Symbol;Acc:HGNC:15703]                                                 |
| ENSG00000136943 | CTSV         | -0.9850849      | 0.02468769 |     |       |           |      |     |      | X                     |              |      |      |               |      | cathepsin V [Source:HGNC Symbol;Acc:HGNC:2538]                                                                                        |
| ENSG00000132646 | PCNA         | -0.857796       | 9.40E-06   |     |       |           |      |     |      | X                     |              |      |      |               |      | proliferating cell nuclear antigen [Source:HGNC Symbol;Acc:HGNC:8729]                                                                 |
| ENSG00000124145 | SDC4         | 1.0208095       | 5.76E-14   |     |       |           |      |     |      | X                     |              |      |      |               |      | syndecan 4 [Source:HGNC Symbol;Acc:HGNC:10661]                                                                                        |
| ENSG00000120708 | TGFB1        | 0.82204711      | 0.00051109 |     |       |           |      |     |      | X                     |              |      |      |               |      | transforming growth factor beta induced [Source:HGNC Symbol;Acc:HGNC:11771]                                                           |
| ENSG00000117984 | CTSD         | 1.40793211      | 6.23E-25   |     |       |           |      |     |      | X                     |              |      |      |               |      | cathepsin D [Source:HGNC Symbol;Acc:HGNC:2529]                                                                                        |
| ENSG00000116584 | ARHGEF2      | 0.75720292      | 9.98E-05   |     |       |           |      |     |      | X                     |              |      |      |               |      | Rho/Rac guanine nucleotide exchange factor 2 [Source:HGNC Symbol;Acc:HGNC:682]                                                        |
| ENSG00000115594 | IL1R1        | 0.97733147      | 0.01090607 |     |       |           | X    |     |      | X                     |              |      |      |               |      | interleukin 1 receptor type 1 [Source:HGNC Symbol;Acc:HGNC:5993]                                                                      |
| ENSG00000111725 | PRKAB1       | 1.26260234      | 0.00432138 |     |       |           |      |     |      | X                     | X            |      |      |               |      | protein kinase AMP-activated non-catalytic subunit beta 1 [Source:HGNC Symbol;Acc:HGNC:9378]                                          |
| ENSG00000110330 | BIRC2        | 1.15897148      | 6.68E-20   |     |       |           |      |     |      | X                     |              | X    |      |               |      | baculoviral IAP repeat containing 2 [Source:HGNC Symbol;Acc:HGNC:590]                                                                 |
| ENSG00000106366 | SERPINE1     | 1.71793858      | 3.01E-17   |     |       |           |      |     |      | X                     |              |      |      |               | X    | serpin family E member 1 [Source:HGNC Symbol;Acc:HGNC:8583]                                                                           |
| ENSG00000105971 | CAV2         | 1.11343361      | 1.27E-06   |     |       |           |      |     |      | X                     |              |      |      |               |      | caveolin 2 [Source:HGNC Symbol;Acc:HGNC:1528]                                                                                         |
| ENSG00000105329 | TGFB1        | 1.14053495      | 0.0038067  |     |       |           | X    |     |      | X                     |              |      |      |               |      | transforming growth factor beta 1 [Source:HGNC Symbol;Acc:HGNC:11766]                                                                 |
| ENSG00000100852 | ARHGAP5      | 1.6313948       | 9.59E-53   |     |       |           |      |     |      | X                     |              |      |      |               |      | Rho GTPase activating protein 5 [Source:HGNC Symbol;Acc:HGNC:675]                                                                     |
| ENSG00000085832 | EPS15        | 0.79988838      | 5.40E-07   |     |       |           |      |     |      | X                     |              |      |      |               |      | epidermal growth factor receptor pathway substrate 15 [Source:HGNC Symbol;Acc:HGNC:3419]                                              |
| ENSG00000084112 | SSH1         | 0.77249691      | 0.000153   |     |       |           |      |     |      | X                     |              |      |      |               |      | slingshot protein phosphatase 1 [Source:HGNC Symbol;Acc:HGNC:30579]                                                                   |
| ENSG00000080503 | SMARCA2      | 1.96671123      | 9.82E-08   |     |       |           |      |     |      | X                     |              |      |      |               |      | SWI/SNF related, matrix associated, actin dependent regulator of chromatin, subfamily a, member 2 [Source:HGNC Symbol;Acc:HGNC:11098] |

|                 |          |            |            |   |  |  |   |   |   |   |   |  |   |   |  |  |   |   |                                                                                         |
|-----------------|----------|------------|------------|---|--|--|---|---|---|---|---|--|---|---|--|--|---|---|-----------------------------------------------------------------------------------------|
| ENSG00000075711 | DLG1     | 1.56519072 | 3.51E-52   |   |  |  |   |   |   | X |   |  |   |   |  |  |   |   | discs large MAGUK scaffold protein 1 [Source:HGNC Symbol;Acc:HGNC:2900]                 |
| ENSG00000075618 | FSCN1    | 1.8429407  | 6.06E-32   |   |  |  |   |   |   | X |   |  |   |   |  |  |   |   | fascin actin-bundling protein 1 [Source:HGNC Symbol;Acc:HGNC:11148]                     |
| ENSG00000072571 | HMMR     | -1.0431829 | 8.25E-29   |   |  |  |   |   |   | X |   |  |   |   |  |  |   |   | hyaluronan mediated motility receptor [Source:HGNC Symbol;Acc:HGNC:5012]                |
| ENSG00000069702 | TGFBR3   | 1.31130991 | 3.73E-06   |   |  |  |   |   |   | X |   |  |   |   |  |  |   |   | transforming growth factor beta receptor 3 [Source:HGNC Symbol;Acc:HGNC:11774]          |
| ENSG00000050820 | BCAR1    | 0.89241441 | 2.09E-05   |   |  |  |   |   |   | X |   |  |   |   |  |  |   |   | BCAR1 scaffold protein, Cas family member [Source:HGNC Symbol;Acc:HGNC:971]             |
| ENSG00000042493 | CAPG     | 1.40020523 | 2.27E-11   |   |  |  |   |   |   | X |   |  |   |   |  |  |   |   | capping actin protein, gelsolin like [Source:HGNC Symbol;Acc:HGNC:1474]                 |
| ENSG00000026508 | CD44     | 0.97128601 | 2.21E-36   |   |  |  |   |   |   | X |   |  |   |   |  |  |   |   | CD44 molecule (Indian blood group) [Source:HGNC Symbol;Acc:HGNC:1681]                   |
| ENSG00000023445 | BIRC3    | 2.29088949 | 3.59E-72   |   |  |  |   |   |   | X |   |  | X |   |  |  |   | X | baculoviral IAP repeat containing 3 [Source:HGNC Symbol;Acc:HGNC:591]                   |
| ENSG00000077782 | FGFR1    | -1.1990805 | 4.42E-13   | x |  |  | X | X | X | X |   |  |   |   |  |  |   |   | fibroblast growth factor receptor 1 [Source:HGNC Symbol;Acc:HGNC:3688]                  |
| ENSG00000072682 | P4HA2    | -1.2010348 | 2.53E-07   |   |  |  |   |   |   | X |   |  |   |   |  |  |   |   | prolyl 4-hydroxylase subunit alpha 2 [Source:HGNC Symbol;Acc:HGNC:8547]                 |
| ENSG00000074211 | PPP2R2C  | -1.431944  | 5.67E-12   |   |  |  | X |   |   | X |   |  |   |   |  |  |   |   | protein phosphatase 2 regulatory subunit Bgamma [Source:HGNC Symbol;Acc:HGNC:9306]      |
| ENSG00000181104 | F2R      | -1.5238348 | 1.52E-30   |   |  |  | X |   |   | X |   |  |   |   |  |  |   |   | coagulation factor II thrombin receptor [Source:HGNC Symbol;Acc:HGNC:3537]              |
| ENSG00000142875 | PRKACB   | -1.5719502 | 3.49E-06   |   |  |  | X | X | X | X |   |  |   |   |  |  |   |   | protein kinase cAMP-activated catalytic subunit beta [Source:HGNC Symbol;Acc:HGNC:9381] |
| ENSG00000164171 | ITGA2    | -1.7871498 | 0.00103898 |   |  |  | X |   |   | X |   |  |   |   |  |  |   |   | integrin subunit alpha 2 [Source:HGNC Symbol;Acc:HGNC:6137]                             |
| ENSG00000169306 | IL1RAPL1 | -2.0239219 | 1.50E-05   |   |  |  | X |   |   | X |   |  |   |   |  |  |   |   | interleukin 1 receptor accessory protein like 1 [Source:HGNC Symbol;Acc:HGNC:5996]      |
| ENSG00000196611 | MMP1     | -2.1998129 | 6.26E-05   |   |  |  |   |   |   | X |   |  |   |   |  |  |   |   | matrix metalloproteinase 1 [Source:HGNC Symbol;Acc:HGNC:7155]                           |
| ENSG00000108342 | CSF3     | 3.0665071  | 7.25E-29   | x |  |  | X |   |   |   |   |  |   |   |  |  |   |   | colony stimulating factor 3 [Source:HGNC Symbol;Acc:HGNC:2438]                          |
| ENSG00000105810 | CDK6     | 2.97163644 | 5.23E-53   |   |  |  | X |   |   |   |   |  |   |   |  |  |   |   | cyclin dependent kinase 6 [Source:HGNC Symbol;Acc:HGNC:1777]                            |
| ENSG00000118515 | SGK1     | 2.27112501 | 1.86E-62   |   |  |  | X |   | X |   |   |  |   |   |  |  |   |   | serum/glucocorticoid regulated kinase 1 [Source:HGNC Symbol;Acc:HGNC:10810]             |
| ENSG00000171552 | BCL2L1   | 1.53907412 | 1.08E-07   |   |  |  | X |   |   |   | X |  |   |   |  |  |   |   | BCL2 like 1 [Source:HGNC Symbol;Acc:HGNC:992]                                           |
| ENSG00000171517 | LPAR3    | 1.39467386 | 1.85E-06   |   |  |  | X |   |   |   |   |  |   |   |  |  |   |   | lysophosphatidic acid receptor 3 [Source:HGNC Symbol;Acc:HGNC:14298]                    |
| ENSG00000168209 | DDIT4    | 1.06477855 | 2.92E-06   |   |  |  | X |   |   |   |   |  |   |   |  |  |   |   | DNA damage inducible transcript 4 [Source:HGNC Symbol;Acc:HGNC:24944]                   |
| ENSG00000167965 | MLST8    | 1.01322785 | 0.02454895 |   |  |  | X |   |   | X |   |  |   |   |  |  |   |   | MTOR associated protein, LST8 homolog [Source:HGNC Symbol;Acc:HGNC:24825]               |
| ENSG00000159110 | IFNAR2   | 0.90591756 | 0.00442067 |   |  |  | X |   |   |   |   |  |   |   |  |  |   |   | interferon alpha and beta receptor subunit 2 [Source:HGNC Symbol;Acc:HGNC:5433]         |
| ENSG00000128272 | ATF4     | 0.88624762 | 4.17E-09   |   |  |  | X | X |   |   |   |  |   |   |  |  | X |   | activating transcription factor 4 [Source:HGNC Symbol;Acc:HGNC:786]                     |
| ENSG00000118689 | FOXO3    | 0.75228084 | 0.00454049 |   |  |  | X |   |   |   |   |  |   |   |  |  |   |   | forkhead box O3 [Source:HGNC Symbol;Acc:HGNC:3821]                                      |
| ENSG00000106615 | RHEB     | -0.7014471 | 0.00508062 |   |  |  | X |   | X |   |   |  |   |   |  |  | X |   | Ras homolog, mTORC1 binding [Source:HGNC Symbol;Acc:HGNC:10011]                         |
| ENSG00000080824 | HSP90AA1 | -1.0018819 | 1.15E-52   |   |  |  | X |   |   | X |   |  |   |   |  |  |   |   | heat shock protein 90 alpha family class A member 1 [Source:HGNC Symbol;Acc:HGNC:5253]  |
| ENSG00000109321 | AREG     | -1.1116935 | 6.40E-22   |   |  |  | X | X |   |   |   |  |   |   |  |  |   |   | amphiregulin [Source:HGNC Symbol;Acc:HGNC:651]                                          |
| ENSG00000243364 | EFNA4    | -1.3153421 | 0.00651192 |   |  |  | X | X | X |   |   |  |   |   |  |  |   |   | ephrin A4 [Source:HGNC Symbol;Acc:HGNC:3224]                                            |
| ENSG00000184349 | EFNA5    | -1.6461496 | 2.96E-11   |   |  |  | X | X | X |   |   |  |   |   |  |  |   |   | ephrin A5 [Source:HGNC Symbol;Acc:HGNC:3225]                                            |
| ENSG00000081041 | CXCL2    | 3.57312971 | 2.35E-14   |   |  |  |   |   |   | X |   |  |   | X |  |  |   |   | C-X-C motif chemokine ligand 2 [Source:HGNC Symbol;Acc:HGNC:4603]                       |
| ENSG00000169429 | CXCL8    | 3.06218352 | 9.22E-12   |   |  |  |   |   |   | X |   |  |   |   |  |  |   |   | C-X-C motif chemokine ligand 8 [Source:HGNC Symbol;Acc:HGNC:6025]                       |
| ENSG00000163739 | CXCL1    | 2.83695335 | 7.47E-36   |   |  |  |   |   |   | X |   |  |   | X |  |  |   |   | C-X-C motif chemokine ligand 1 [Source:HGNC Symbol;Acc:HGNC:4602]                       |
| ENSG00000118503 | TNFAIP3  | 1.88124069 | 1.82E-06   |   |  |  |   |   |   | X |   |  |   | X |  |  |   |   | TNF alpha induced protein 3 [Source:HGNC Symbol;Acc:HGNC:11896]                         |
| ENSG00000116717 | GADD45A  | 1.47231859 | 1.58E-45   |   |  |  | X |   |   | X |   |  |   |   |  |  |   |   | growth arrest and DNA damage inducible alpha [Source:HGNC Symbol;Acc:HGNC:4095]         |
| ENSG00000104856 | RELB     | 1.44412326 | 6.27E-09   |   |  |  | X |   |   | X |   |  |   |   |  |  |   |   | RELB proto-oncogene, NF-kB subunit [Source:HGNC Symbol;Acc:HGNC:9956]                   |
| ENSG00000197943 | PLCG2    | 1.3911277  | 0.00356793 |   |  |  |   |   | X | X |   |  |   |   |  |  |   | X | phospholipase C gamma 2 [Source:HGNC Symbol;Acc:HGNC:9066]                              |
| ENSG00000056558 | TRAF1    | 1.01878692 | 0.03628074 |   |  |  |   |   |   | X |   |  |   | X |  |  |   |   | TNF receptor associated factor 1 [Source:HGNC Symbol;Acc:HGNC:12031]                    |
| ENSG00000121060 | TRIM25   | 0.91804367 | 1.08E-12   |   |  |  |   |   |   | X |   |  |   |   |  |  |   |   | tripartite motif containing 25 [Source:HGNC Symbol;Acc:HGNC:12932]                      |
| ENSG00000100906 | NFKBIA   | 0.8222283  | 8.22E-11   |   |  |  |   |   |   | X |   |  |   | X |  |  |   |   | NFKB inhibitor alpha [Source:HGNC Symbol;Acc:HGNC:7797]                                 |
| ENSG00000111321 | LTBR     | 0.80203738 | 0.00016421 |   |  |  |   |   |   | X |   |  |   |   |  |  |   | X | lymphotoxin beta receptor [Source:HGNC Symbol;Acc:HGNC:6718]                            |
| ENSG00000149311 | ATM      | 0.73192289 | 3.25E-05   |   |  |  |   |   |   | X | X |  |   |   |  |  |   |   | ATM serine/threonine kinase [Source:HGNC Symbol;Acc:HGNC:795]                           |
| ENSG00000143799 | PARP1    | -0.7575778 | 3.98E-12   |   |  |  |   |   |   | X |   |  |   |   |  |  |   |   | poly(ADP-ribose) polymerase 1 [Source:HGNC Symbol;Acc:HGNC:270]                         |
| ENSG00000071242 | RPS6KA2  | 2.15943903 | 5.01E-06   |   |  |  | X |   | X |   |   |  |   |   |  |  |   |   | ribosomal protein S6 kinase A2 [Source:HGNC Symbol;Acc:HGNC:10431]                      |
| ENSG00000130766 | SESN2    | 1.8209808  | 9.32E-37   |   |  |  |   |   |   | X |   |  |   |   |  |  |   |   | sesn2 [Source:HGNC Symbol;Acc:HGNC:20746]                                               |
| ENSG00000174804 | FZD4     | 1.74620214 | 7.34E-05   |   |  |  |   |   |   | X |   |  |   |   |  |  |   |   | frizzled class receptor 4 [Source:HGNC Symbol;Acc:HGNC:4042]                            |
| ENSG00000103257 | SLC7A5   | 1.30985335 | 7.00E-17   |   |  |  |   |   |   | X |   |  |   |   |  |  |   |   | solute carrier family 7 member 5 [Source:HGNC Symbol;Acc:HGNC:11063]                    |
| ENSG00000052795 | FNIP2    | 1.11927327 | 0.01139713 |   |  |  |   |   |   | X |   |  |   |   |  |  |   |   | folliculin interacting protein 2 [Source:HGNC Symbol;Acc:HGNC:29280]                    |
| ENSG00000106070 | GRB10    | 1.03315855 | 1.10E-06   |   |  |  |   |   |   | X |   |  |   |   |  |  |   |   | growth factor receptor bound protein 10 [Source:HGNC Symbol;Acc:HGNC:4564]              |

|                 |           |            |            |  |   |   |   |   |   |   |   |   |   |   |  |                                                                                                 |
|-----------------|-----------|------------|------------|--|---|---|---|---|---|---|---|---|---|---|--|-------------------------------------------------------------------------------------------------|
| ENSG00000130779 | CLIP1     | 0.99280546 | 1.19E-29   |  |   |   |   |   | X |   |   |   |   |   |  | CAP-Gly domain containing linker protein 1 [Source:HGNC Symbol;Acc:HGNC:10461]                  |
| ENSG00000239282 | CASTOR1   | 0.85109626 | 0.04289612 |  |   |   |   |   | X |   |   |   |   |   |  | cytosolic arginine sensor for mTORC1 subunit 1 [Source:HGNC Symbol;Acc:HGNC:34423]              |
| ENSG00000168003 | SLC3A2    | 0.80537299 | 3.22E-07   |  |   |   |   |   | X |   |   |   |   |   |  | solute carrier family 3 member 2 [Source:HGNC Symbol;Acc:HGNC:11026]                            |
| ENSG00000145604 | SKP2      | -0.9049038 | 0.00070327 |  |   |   |   |   | X |   |   |   |   |   |  | S-phase kinase associated protein 2 [Source:HGNC Symbol;Acc:HGNC:10901]                         |
| ENSG00000100726 | TELO2     | -1.2538611 | 0.02246188 |  |   |   |   |   | X |   |   |   |   |   |  | telomere maintenance 2 [Source:HGNC Symbol;Acc:HGNC:29099]                                      |
| ENSG00000145358 | DDIT4L    | -2.6130451 | 1.53E-08   |  |   |   |   |   | X |   |   |   |   |   |  | DNA damage inducible transcript 4 like [Source:HGNC Symbol;Acc:HGNC:30555]                      |
| ENSG00000198925 | ATG9A     | 0.98236548 | 0.00012216 |  |   |   |   |   |   | X |   |   |   |   |  | autophagy related 9A [Source:HGNC Symbol;Acc:HGNC:22408]                                        |
| ENSG00000167987 | VPS37C    | 0.72807486 | 0.02884073 |  |   |   |   |   |   | X |   |   |   |   |  | VPS37C subunit of ESCRT-I [Source:HGNC Symbol;Acc:HGNC:26097]                                   |
| ENSG00000164741 | DLC1      | -0.8376075 | 0.04527561 |  |   |   |   |   |   | X |   |   |   |   |  | DLC1 Rho GTPase activating protein [Source:HGNC Symbol;Acc:HGNC:2897]                           |
| ENSG00000158828 | PINK1     | 0.7592507  | 0.00119544 |  |   |   |   |   |   | X |   |   |   |   |  | PTEN induced kinase 1 [Source:HGNC Symbol;Acc:HGNC:14581]                                       |
| ENSG00000140941 | MAP1LC3B  | 0.95591442 | 8.69E-14   |  |   |   |   |   |   | X |   |   |   |   |  | microtubule associated protein 1 light chain 3 beta [Source:HGNC Symbol;Acc:HGNC:13352]         |
| ENSG00000139112 | GABARAPL1 | 1.30417222 | 2.34E-06   |  |   |   |   |   |   | X |   |   |   |   |  | GABA type A receptor associated protein like 1 [Source:HGNC Symbol;Acc:HGNC:4068]               |
| ENSG00000137285 | TUBB2B    | 3.16751393 | 1.97E-12   |  |   |   |   |   |   | X |   |   |   |   |  | tubulin beta 2B class IIb [Source:HGNC Symbol;Acc:HGNC:30829]                                   |
| ENSG00000110497 | AMBRA1    | 1.43453185 | 1.79E-05   |  |   |   |   |   |   | X |   |   |   |   |  | autophagy and beclin 1 regulator 1 [Source:HGNC Symbol;Acc:HGNC:25990]                          |
| ENSG00000109971 | HSPA8     | -0.8176342 | 2.50E-14   |  | X |   |   |   |   | X |   |   |   |   |  | heat shock protein family A (Hsp70) member 8 [Source:HGNC Symbol;Acc:HGNC:5241]                 |
| ENSG00000074319 | TSG101    | 0.91985685 | 2.74E-06   |  |   |   |   |   |   | X |   |   |   |   |  | tumor susceptibility 101 [Source:HGNC Symbol;Acc:HGNC:15971]                                    |
| ENSG00000032742 | IFT88     | -1.1159913 | 7.30E-05   |  |   |   |   |   |   | X |   |   |   |   |  | intraflagellar transport 88 [Source:HGNC Symbol;Acc:HGNC:20606]                                 |
| ENSG00000204388 | HSPA1B    | -1.5535942 | 2.67E-07   |  |   | X |   |   |   |   |   |   |   |   |  | heat shock protein family A (Hsp70) member 1B [Source:HGNC Symbol;Acc:HGNC:5233]                |
| ENSG00000175197 | DDIT3     | 1.30934941 | 2.16E-09   |  |   | X |   |   |   |   |   |   |   |   |  | DNA damage inducible transcript 3 [Source:HGNC Symbol;Acc:HGNC:2726]                            |
| ENSG00000170345 | FOS       | 0.96670504 | 0.02059999 |  |   | X |   |   |   |   |   | X |   |   |  | Fos proto-oncogene, AP-1 transcription factor subunit [Source:HGNC Symbol;Acc:HGNC:3796]        |
| ENSG00000142408 | CACNG8    | 0.70087874 | 6.41E-05   |  |   | X |   |   |   |   |   |   |   |   |  | calcium voltage-gated channel auxiliary subunit gamma 8 [Source:HGNC Symbol;Acc:HGNC:13628]     |
| ENSG00000139318 | DUSP6     | -2.0689486 | 6.60E-49   |  |   | X |   |   |   |   |   |   |   |   |  | dual specificity phosphatase 6 [Source:HGNC Symbol;Acc:HGNC:3072]                               |
| ENSG00000138166 | DUSP5     | 3.09561866 | 4.70E-09   |  |   | X |   |   |   |   |   |   |   |   |  | dual specificity phosphatase 5 [Source:HGNC Symbol;Acc:HGNC:3071]                               |
| ENSG00000131196 | NFATC1    | -0.7546608 | 0.01035181 |  |   | X |   |   |   |   |   |   |   |   |  | nuclear factor of activated T cells 1 [Source:HGNC Symbol;Acc:HGNC:7775]                        |
| ENSG00000075461 | CACNG4    | -1.7865064 | 3.25E-05   |  |   | X |   |   |   |   |   |   |   |   |  | calcium voltage-gated channel auxiliary subunit gamma 4 [Source:HGNC Symbol;Acc:HGNC:1408]      |
| ENSG00000169733 | RFNG      | 0.73737487 | 0.00043724 |  |   |   | X |   |   |   |   |   |   |   |  | RFNG O-fucosylpeptide 3-beta-N-acetylglucosaminyltransferase [Source:HGNC Symbol;Acc:HGNC:9974] |
| ENSG00000163840 | DTX3L     | 1.07497    | 1.42E-14   |  |   |   | X |   |   |   |   |   |   |   |  | deltex E3 ubiquitin ligase 3L [Source:HGNC Symbol;Acc:HGNC:30323]                               |
| ENSG00000148400 | NOTCH1    | -0.9986385 | 0.00200746 |  |   |   | X |   |   |   |   |   |   |   |  | notch receptor 1 [Source:HGNC Symbol;Acc:HGNC:7881]                                             |
| ENSG00000143801 | PSEN2     | -0.8661833 | 0.03142169 |  |   |   | X |   |   |   |   |   |   |   |  | presenilin 2 [Source:HGNC Symbol;Acc:HGNC:9509]                                                 |
| ENSG00000134250 | NOTCH2    | -0.7006488 | 0.00051098 |  |   |   | X |   |   |   |   |   |   |   |  | notch receptor 2 [Source:HGNC Symbol;Acc:HGNC:7882]                                             |
| ENSG00000100342 | APOL1     | 2.48116154 | 1.71E-07   |  |   |   | X |   |   |   |   |   |   |   |  | apolipoprotein L1 [Source:HGNC Symbol;Acc:HGNC:618]                                             |
| ENSG00000204217 | BMPR2     | 0.84863886 | 4.79E-05   |  |   |   |   |   |   |   | X |   |   |   |  | bone morphogenetic protein receptor type 2 [Source:HGNC Symbol;Acc:HGNC:1078]                   |
| ENSG00000198742 | SMURF1    | 1.35528098 | 6.05E-08   |  |   |   |   |   |   |   | X |   |   |   |  | SMAD specific E3 ubiquitin protein ligase 1 [Source:HGNC Symbol;Acc:HGNC:16807]                 |
| ENSG00000115738 | ID2       | -1.0154861 | 0.00249446 |  |   |   |   |   |   |   | X |   |   |   |  | inhibitor of DNA binding 2 [Source:HGNC Symbol;Acc:HGNC:5361]                                   |
| ENSG00000113658 | SMAD5     | -0.7429178 | 1.19E-10   |  |   |   |   |   |   |   | X |   |   |   |  | SMAD family member 5 [Source:HGNC Symbol;Acc:HGNC:6771]                                         |
| ENSG00000113558 | SKP1      | -0.7194287 | 8.62E-16   |  |   |   |   |   |   |   | X |   |   |   |  | S-phase kinase associated protein 1 [Source:HGNC Symbol;Acc:HGNC:10899]                         |
| ENSG00000100387 | RBX1      | -0.7802642 | 3.70E-05   |  |   |   |   |   |   |   | X |   |   | X |  | ring-box 1 [Source:HGNC Symbol;Acc:HGNC:9928]                                                   |
| ENSG00000271503 | CCL5      | 4.27573986 | 7.14E-15   |  |   |   |   |   |   |   |   | X |   |   |  | C-C motif chemokine ligand 5 [Source:HGNC Symbol;Acc:HGNC:10632]                                |
| ENSG00000172216 | CEBPB     | 1.24574732 | 5.54E-09   |  |   |   |   |   |   |   |   | X |   |   |  | CCAAT enhancer binding protein beta [Source:HGNC Symbol;Acc:HGNC:1834]                          |
| ENSG00000168404 | MLKL      | 1.44577841 | 0.00012485 |  |   |   |   |   |   |   |   | X |   |   |  | mixed lineage kinase domain like pseudokinase [Source:HGNC Symbol;Acc:HGNC:26617]               |
| ENSG00000163735 | CXCL5     | 2.69800517 | 5.33E-42   |  |   |   |   |   |   |   |   |   | X |   |  | C-X-C motif chemokine ligand 5 [Source:HGNC Symbol;Acc:HGNC:10642]                              |
| ENSG00000125347 | IRF1      | 0.94828505 | 1.33E-06   |  |   |   |   |   |   |   |   | X |   |   |  | interferon regulatory factor 1 [Source:HGNC Symbol;Acc:HGNC:6116]                               |
| ENSG00000165527 | ARF6      | 0.82372665 | 4.87E-14   |  |   |   |   | X |   |   |   |   |   |   |  | ADP ribosylation factor 6 [Source:HGNC Symbol;Acc:HGNC:659]                                     |
| ENSG00000144118 | RALB      | 0.9491103  | 6.07E-11   |  |   |   |   | X |   |   |   |   |   |   |  | RAS like proto-oncogene B [Source:HGNC Symbol;Acc:HGNC:9840]                                    |
| ENSG00000134954 | ETS1      | 1.19167042 | 1.16E-09   |  |   |   |   | X |   |   |   |   |   |   |  | ETS proto-oncogene 1, transcription factor [Source:HGNC Symbol;Acc:HGNC:3488]                   |
| ENSG00000075391 | RASAL2    | -2.1760086 | 1.94E-31   |  |   |   |   | X |   |   |   |   |   |   |  | RAS protein activator like 2 [Source:HGNC Symbol;Acc:HGNC:9874]                                 |
| ENSG00000113070 | HBEGF     | 1.64130511 | 6.42E-17   |  | X |   |   |   |   |   |   |   |   |   |  | heparin binding EGF like growth factor [Source:HGNC Symbol;Acc:HGNC:3059]                       |
| ENSG00000168610 | STAT3     | 0.97476839 | 6.71E-09   |  |   |   |   |   |   |   |   |   |   | X |  | signal transducer and activator of transcription 3 [Source:HGNC Symbol;Acc:HGNC:11364]          |
| ENSG00000156510 | HKDC1     | -2.5992454 | 6.74E-38   |  |   |   |   |   |   |   |   |   |   | X |  | hexokinase domain containing 1 [Source:HGNC Symbol;Acc:HGNC:23302]                              |
| ENSG00000072274 | TFRC      | -0.739833  | 1.68E-07   |  |   |   |   |   |   |   |   |   |   | X |  | transferrin receptor [Source:HGNC Symbol;Acc:HGNC:11763]                                        |
